# Supplementary material for: Testing the Global Malaise Trap Program – How well does the current barcode reference library identify flying insects in Germany?
Source: Biodivers Data J. 2016 Dec 1;(4):e10671. doi: 10.3897/BDJ.4.e10671 (PMC5136679; doi:10.3897/BDJ.4.e10671)
Supplement: Supplementary material 1 — Result of the BIN discordance analysis (BOLD, September 25th 2015) for all BINs. [file biodiversity_data_journal-4-e10671-s001.xlsx]

## Sheet: ALL Bins
BINs with Taxonomic Discordance													BINs with Concordant Taxonomy								BINs with Single Specimens
Process ID	Order	Identification	Conflicting Taxon in BIN	Rank of Conflict	BIN	BIN Total Members	BIN Tax Variation						Process ID	Order	Identification	Rank of Conflict	BIN	BIN Total Members			Process ID	Order	Identification	Rank of Conflict	BIN
GMGMN1184-14	Coleoptera	Coccinella septempunctata	Insecta	Class	BOLD:AAA8933	391	Insecta[405], Arachnida[1]						GMGMD1080-14	Araneae	Eutichuridae	Family	BOLD:ACQ9920	2			GMGMC584-14	Hemiptera	Hemiptera	Order	BOLD:ACR2292
GMGML1210-14	Dermaptera	Forficula auricularia-B	Insecta	Class	BOLD:AAE0456	69	Insecta[70], Collembola[1]						GMGRA1816-13	Coleoptera	Staphylinidae	Family	BOLD:ACF7879	31			GMGMF1101-14	Trombidiformes	Trombidiformes	Order	BOLD:ACR2663
GMGMF1074-14	Diptera	Bibionidae	Insecta	Class	BOLD:ACG2955	10	Insecta[9], Arachnida[1]						GMGRD3018-13	Coleoptera	Latridiidae	Family	BOLD:ACG3363	2			GMGMA155-14	Coleoptera	Cantharidae	Family	BOLD:ACQ8810
GMGRD1574-13	Heteroptera	Stenotus binotatus	Insecta	Class	BOLD:AAC0635	228	Insecta[237], Arachnida[1]						GMGMA151-14	Coleoptera	Mordellidae	Family	BOLD:ACO6512	3			GMGMB1514-14	#N/A	Cecidomyiidae	Family	BOLD:ACX1144
GMGMA643-14	Coleoptera	Oulema	Chrysomelidae	Family	BOLD:AAK5928	109	Chrysomelidae[109], Cleridae[2]						GMGML1303-14	Coleoptera	Mordellidae	Family	BOLD:ACP3789	2			GMGMA885-14	Diptera	Cecidomyiidae	Family	BOLD:ACQ9748
GMGRE2936-13	Coleoptera	Cartodere nodifer	Latridiidae	Family	BOLD:AAO0516	109	Latridiidae[102], Dermestidae[1]						GMGMA1171-14	Coleoptera	Mordellidae	Family	BOLD:ACP5293	10			GMGMA1404-14	Diptera	Cecidomyiidae	Family	BOLD:ACQ8849
GMGMN1160-14	Coleoptera	Schizotus pectinicornis	Pyrochroidae	Family	BOLD:AAP7191	26	Pyrochroidae[24], Cerambycidae[2]						GMGRF6164-13	Diptera	Phoridae	Family	BOLD:AAG3254	176			GMGMA1268-14	Diptera	Cecidomyiidae	Family	BOLD:ACQ9098
GMGMB1385-14	Coleoptera	Aleochara curtula	Staphylinidae	Family	BOLD:AAJ2741	25	Staphylinidae[22], Dytiscidae[3]						GMGMJ1511-14	Diptera	Phoridae	Family	BOLD:AAG3316	599			GMGMA1385-14	Diptera	Cecidomyiidae	Family	BOLD:ACQ9862
GMGRD3014-13	Diptera	Lasiomma strigilatum	Anthomyiidae	Family	BOLD:ACI8977	37	Anthomyiidae[21], Sphaeroceridae[1]						GMGRH1517-13	Diptera	Cecidomyiidae	Family	BOLD:AAG3625	591			GMGMA1252-14	Diptera	Cecidomyiidae	Family	BOLD:ACQ9038
GMGMH1561-14	Diptera	Calliphoridae	Calliphoridae	Family	BOLD:ACR0452	21	Fanniidae[13], Calliphoridae[8]						GMGMK1316-14	Diptera	Mycetophilidae	Family	BOLD:AAG4899	17			GMGMA173-14	Diptera	Cecidomyiidae	Family	BOLD:ACQ9689
GMGRD3048-13	Diptera	Clusiodes ruficollis	Clusiidae	Family	BOLD:ACK9548	14	Clusiidae[11], Anthomyzidae[1]						GMGMI992-14	Diptera	Fanniinae	Family	BOLD:AAG6810	34			GMGMA1243-14	Diptera	Cecidomyiidae	Family	BOLD:ACQ9709
GMGRD1508-13	Diptera	Mycetophilidae	Mycetophilidae	Family	BOLD:ACJ7389	2	Keroplatidae[1], Mycetophilidae[1]						GMGRG3366-13	Diptera	Cecidomyiidae	Family	BOLD:AAH2876	54			GMGMA1532-14	Coleoptera	Cerambycidae	Family	BOLD:ACR2993
GMGMG498-14	Diptera	Tricyphona alticola	Pediciidae	Family	BOLD:ABA7460	10	Limoniidae[10], Pediciidae[4]						GMGRE1257-13	Diptera	Cecidomyiidae	Family	BOLD:AAH3621	1598			GMGMA1313-14	Diptera	Chamaemyiidae	Family	BOLD:ACQ9317
GMGME1047-14	Diptera	Ula sylvatica	Pediciidae	Family	BOLD:AAV1814	148	Pediciidae[144], Limoniidae[4]						GMGRD2240-13	Diptera	Cecidomyiidae	Family	BOLD:AAH3623	12			GMGMA1454-14	Hymenoptera	Ichneumonidae	Family	BOLD:ACQ9358
GMGMC778-14	Diptera	Callomyia amoena	Platypezidae	Family	BOLD:ACB7798	6	Platypezidae[5], Empididae[1]						GMGRE1265-13	Diptera	Cecidomyiidae	Family	BOLD:AAH3664	158			GMGMA1206-14	Hymenoptera	Ichneumonidae	Family	BOLD:ACQ9406
GMGML1054-14	Diptera	Rhagionidae	Rhagionidae	Family	BOLD:ACI4789	16	Rhagionidae[14], Tachinidae[1]						GMGRD3400-13	Diptera	Cecidomyiidae	Family	BOLD:AAH3709	57			GMGMA709-14	Hymenoptera	Ichneumonidae	Family	BOLD:ACR0437
GMGRB1981-13	Diptera	Sarcophagidae	Sarcophagidae	Family	BOLD:ACD2673	11	Sarcophagidae[6], Tachinidae[1], Calliphoridae[1]						GMGRE1844-13	Diptera	Cecidomyiidae	Family	BOLD:AAH3720	1527			GMGMA1244-14	Diptera	Sciaridae	Family	BOLD:ACQ8798
GMGMI933-14	Diptera	Sphaeroceridae	Sphaeroceridae	Family	BOLD:ACG7813	12	Sphaeroceridae[10], Clusiidae[1]						GMGRG2558-13	Diptera	Cecidomyiidae	Family	BOLD:AAH3738	319			GMGMC497-14	Diptera	Agromyzidae	Family	BOLD:ACR0535
GMGRC1074-13	Diptera	Spelobia	Sphaeroceridae	Family	BOLD:ACE0514	11	Sphaeroceridae[10], Phoridae[1]						GMGRD2443-13	Diptera	Cecidomyiidae	Family	BOLD:AAH3752	180			GMGMC1176-14	Diptera	Agromyzidae	Family	BOLD:ACR0115
GMGRB1146-13	Diptera	Chrysotoxum arcuatum	Syrphidae	Family	BOLD:ABY8541	28	Syrphidae[24], Tachinidae[3]						GMGRE1187-13	Diptera	Cecidomyiidae	Family	BOLD:AAM6107	1345			GMGMC914-14	Hymenoptera	Braconidae	Family	BOLD:ACR0460
GMGRD3659-13	Diptera	Chrysotoxum fasciolatum	Syrphidae	Family	BOLD:ABY8540	19	Syrphidae[16], Tachinidae[2], Sciaridae[1]						GMGRD3088-13	Diptera	Cecidomyiidae	Family	BOLD:AAM6116	167			GMGMC1363-14	Hymenoptera	Braconidae	Family	BOLD:ACR0466
GMGMI930-14	Diptera	Tachinidae	Tachinidae	Family	BOLD:ACL8661	4	Tachinidae[3], Syrphidae[1]						GMGMA027-14	Diptera	Phoridae	Family	BOLD:AAM9376	47			GMGMC331-14	Diptera	Cecidomyiidae	Family	BOLD:ACR0636
GMGMG1182-14	Hymenoptera	Braconidae	Braconidae	Family	BOLD:ACR4623	9	Braconidae[6], Ichneumonidae[2]						GMGRD1270-13	Diptera	Cecidomyiidae	Family	BOLD:AAN5178	82			GMGMC531-14	Diptera	Cecidomyiidae	Family	BOLD:ACR0322
GMGME1049-14	Hymenoptera	Cynipidae	Cynipidae	Family	BOLD:ACG4509	2	Figitidae[1], Cynipidae[1]						GMGRB1264-13	Diptera	Cecidomyiidae	Family	BOLD:AAN5190	23			GMGMC519-14	Diptera	Cecidomyiidae	Family	BOLD:ACQ9957
GMGML1202-14	Hymenoptera	Diapriidae	Diapriidae	Family	BOLD:ACC0804	19	Diapriidae[20], Pteromalidae[1]						GMGRE1930-13	Diptera	Cecidomyiidae	Family	BOLD:AAN5199	259			GMGMC1109-14	Diptera	Cecidomyiidae	Family	BOLD:ACQ8816
GMGMG1202-14	Hymenoptera	Lasioglossum	Halictidae	Family	BOLD:AAB0353	100	Halictidae[96], Apidae[4]						GMGMB1523-14	Diptera	Cecidomyiidae	Family	BOLD:AAN5205	58			GMGMC1257-14	Diptera	Cecidomyiidae	Family	BOLD:ACR1015
GMGMD370-14	Hymenoptera	Halictus rubicundus	Halictidae	Family	BOLD:AAA3534	168	Halictidae[199], Apidae[1]						GMGRB1311-13	Diptera	Cecidomyiidae	Family	BOLD:AAN5250	72			GMGMC533-14	Diptera	Cecidomyiidae	Family	BOLD:ACR0103
GMGRD3023-13	Hymenoptera	Ichneumonidae	Ichneumonidae	Family	BOLD:ACG5294	9	Ichneumonidae[8], Braconidae[1]						GMGMB896-14	Diptera	Cecidomyiidae	Family	BOLD:AAN5259	14			GMGMC1148-14	Diptera	Cecidomyiidae	Family	BOLD:ACQ9172
GMGMJ1391-14	Hymenoptera	Stenomacrus	Ichneumonidae	Family	BOLD:AAN8654	122	Ichneumonidae[89], Braconidae[1]						GMGMC1486-14	Diptera	Cecidomyiidae	Family	BOLD:AAN5271	31			GMGMC1586-14	Diptera	Cecidomyiidae	Family	BOLD:ACR0689
GMGMH1159-14	Hymenoptera	Megachile	Megachilidae	Family	BOLD:ABZ3482	37	Megachilidae[36], Apidae[1]						GMGMC1553-14	Diptera	Orthocladiinae	Family	BOLD:AAN5342	604			GMGMC1261-14	Diptera	Dolichopodidae	Family	BOLD:ACR0561
GMGMH1556-14	Hymenoptera	Megachile ligniseca	Megachilidae	Family	BOLD:AAE8869	18	Megachilidae[16], Apidae[2]						GMGRG3504-13	Diptera	Sphaeroceridae	Family	BOLD:AAN6411	6			GMGMC957-14	Hymenoptera	Eulophidae	Family	BOLD:ACR0354
GMGMJ1377-14	Hymenoptera	Alaptus	Mymaridae	Family	BOLD:ACE1230	14	Mymaridae[109], Aphelinidae[1]						GMGMD750-14	Diptera	Sciaridae	Family	BOLD:AAN6441	7			GMGMC1178-14	Diptera	Phoridae	Family	BOLD:ACR0693
GMGRF5571-13	Hymenoptera	Proctotrupidae	Proctotrupidae	Family	BOLD:ACI4065	3	Proctotrupidae[2], Figitidae[1]						GMGMN343-14	Diptera	Phoridae	Family	BOLD:AAN8713	29			GMGMC1501-14	Diptera	Phoridae	Family	BOLD:ACR0978
GMGRB1986-13	Hymenoptera	Symmorphus bifasciatus	Vespidae	Family	BOLD:AAN3541	68	Vespidae[64], Eumenidae[5]						GMGRE2533-13	Diptera	Sphaeroceridae	Family	BOLD:AAP3625	17			GMGMC1252-14	Diptera	Phoridae	Family	BOLD:ACU7651
GMGRD3006-13	Hymenoptera	Symmorphus allobrogus	Vespidae	Family	BOLD:AAN0135	30	Vespidae[27], Eumenidae[3]						GMGRH1282-13	Diptera	Cecidomyiidae	Family	BOLD:AAP6843	29			GMGMC1051-14	Hymenoptera	Proctotrupidae	Family	BOLD:ACQ9969
GMGMK029-14	Hymenoptera	Ancistrocerus antilope	Vespidae	Family	BOLD:AAM2254	32	Vespidae[31], Eumenidae[1]						GMGRF427-13	Diptera	Cecidomyiidae	Family	BOLD:AAP6847	35			GMGMB876-14	Hymenoptera	Braconidae	Family	BOLD:ACQ8909
GMGMH1559-14	Hymenoptera	Ancistrocerus trifasciatus	Vespidae	Family	BOLD:AAM3937	51	Vespidae[48], Eumenidae[4]						GMGRE3760-13	Diptera	Cecidomyiidae	Family	BOLD:AAP8816	15			GMGMB1166-14	Hymenoptera	Braconidae	Family	BOLD:ACQ8468
GMGRF5278-13	Lepidoptera	Elachista consortella	Elachistidae	Family	BOLD:AAP4341	23	Elachistidae[22], Gelechiidae[1]						GMGRC1343-13	Diptera	Cecidomyiidae	Family	BOLD:AAP9029	176			GMGMB130-14	Hymenoptera	Braconidae	Family	BOLD:ACQ9513
GMGRG3959-13	Lepidoptera	Rivula sericealis	Erebidae	Family	BOLD:AAB4777	47	Erebidae[46], Noctuidae[1]						GMGRD513-13	Diptera	Cecidomyiidae	Family	BOLD:AAP9033	24			GMGMB1542-14	Diptera	Cecidomyiidae	Family	BOLD:ACR0633
GMGRC1067-13	Lepidoptera	Laspeyria flexula	Erebidae	Family	BOLD:AAC1014	39	Erebidae[38], Geometridae[1]						GMGRE582-13	Diptera	Cecidomyiidae	Family	BOLD:AAP9039	231			GMGMB307-14	Diptera	Cecidomyiidae	Family	BOLD:ACQ9478
GMGRD3651-13	Lepidoptera	Euspilapteryx auroguttella	Gracillariidae	Family	BOLD:AAD7434	51	Gracillariidae[49], Depressariidae[1]						GMGRD2452-13	Diptera	Psychodidae	Family	BOLD:AAP9909	143			GMGMB1528-14	Diptera	Cecidomyiidae	Family	BOLD:ACR0113
GMGRD2964-13	Lepidoptera	Parornix torquillella	Gracillariidae	Family	BOLD:AAF8206	62	Gracillariidae[61], Tortricidae[1]						GMGRF4142-13	Diptera	Orthocladiinae	Family	BOLD:AAQ0599	23			GMGMB1548-14	Diptera	Cecidomyiidae	Family	BOLD:ACQ9964
GMGRG3973-13	Lepidoptera	Thymelicus sylvestris	Hesperiidae	Family	BOLD:AAA6764	65	Hesperiidae[64], Lycaenidae[1]						GMGMK1387-14	Diptera	Lauxaniidae	Family	BOLD:AAQ0774	33			GMGMB234-14	Diptera	Cecidomyiidae	Family	BOLD:ACQ9141
GMGMM1465-14	Lepidoptera	Autographa	Noctuidae	Family	BOLD:AAB4345	263	Noctuidae[259], Geometridae[1], Erebidae[1]						GMGRG4629-13	Diptera	Cecidomyiidae	Family	BOLD:AAU6512	11			GMGMB273-14	Diptera	Cecidomyiidae	Family	BOLD:ACQ8676
GMGME1035-14	Lepidoptera	Argynnis	Nymphalidae	Family	BOLD:AAA8958	127	Nymphalidae[126], Hesperiidae[1]						GMGRG3650-13	Diptera	Cecidomyiidae	Family	BOLD:AAU6607	8			GMGMB228-14	Diptera	Cecidomyiidae	Family	BOLD:ACQ9637
GMGMG1197-14	Lepidoptera	Pieris	Pieridae	Family	BOLD:AAA2226	542	Pieridae[538], Lycaenidae[1]						GMGMD724-14	Diptera	Phoridae	Family	BOLD:AAU6624	165			GMGMB101-14	Diptera	Cecidomyiidae	Family	BOLD:ACQ9742
GMGMI940-14	Lepidoptera	Plutella	Plutellidae	Family	BOLD:AAA1513	1736	Plutellidae[1750], Gracillariidae[1], Tortricidae[1]						GMGRG4144-13	Diptera	Sphaeroceridae	Family	BOLD:AAV0751	20			GMGMB1516-14	Diptera	Cecidomyiidae	Family	BOLD:ACR0668
GMGMK1011-14	Lepidoptera	Archips	Tortricidae	Family	BOLD:AAB9404	80	Tortricidae[73], Drepanidae[1]						GMGMA087-14	Diptera	Agromyzidae	Family	BOLD:AAV4830	45			GMGMB1162-14	Diptera	Cecidomyiidae	Family	BOLD:ACQ8957
GMGMI950-14	Araneae	Agyneta	Agyneta	Genus	BOLD:AAE5234	54	Agyneta[52], Meioneta[2]						GMGMJ1103-14	Diptera	Cecidomyiidae	Family	BOLD:AAV5319	7			GMGMB219-14	Diptera	Cecidomyiidae	Family	BOLD:ACQ8530
GMGRC1079-13	Coleoptera	Absidia schoenherri	Absidia	Genus	BOLD:ABX1912	20	Podistra[19], Absidia[1]						GMGRG4063-13	Diptera	Cecidomyiidae	Family	BOLD:AAV5324	16			GMGMB309-14	Diptera	Cecidomyiidae	Family	BOLD:ACQ8724
GMGMK1078-14	Coleoptera	Apocatops nigritus	Apocatops	Genus	BOLD:AAI7294	9	Apocatops[7], Catops[1]						GMGRE1402-13	Diptera	Cecidomyiidae	Family	BOLD:AAV5325	165			GMGMB850-14	Hymenoptera	Cynipidae	Family	BOLD:ACQ9830
GMGMK1003-14	Coleoptera	Bruchidius villosus	Bruchidius	Genus	BOLD:AAN6212	15	Bruchidius[9], Bruchus[1]						GMGRF4784-13	Diptera	Cecidomyiidae	Family	BOLD:AAV5575	69			GMGMB899-14	Diptera	Empididae	Family	BOLD:ACQ9247
GMGML1065-14	Coleoptera	Caenorhinus germanicus	Caenorhinus	Genus	BOLD:AAO1238	14	Caenorhinus[7], Neocoenorrhinus[5]						GMGRH1631-13	Diptera	Cecidomyiidae	Family	BOLD:AAV5679	2			GMGMB180-14	Diptera	Hybotidae	Family	BOLD:ACQ8639
GMGMM1487-14	Coleoptera	Corymbia rubra	Corymbia	Genus	BOLD:AAI8975	18	Corymbia[13], Stictoleptura[5]						GMGRG4773-13	Diptera	Cecidomyiidae	Family	BOLD:AAV5788	222			GMGMB817-14	Hymenoptera	Ichneumonidae	Family	BOLD:ACQ9713
GMGMN1134-14	Coleoptera	Dasytes niger	Dasytes	Genus	BOLD:AAO1143	38	Dasytes[35], Danacea[1]						GMGRD454-13	Diptera	Cecidomyiidae	Family	BOLD:AAV5793	322			GMGMB672-14	Hymenoptera	Ichneumonidae	Family	BOLD:ACR2553
GMGMG1185-14	Coleoptera	Hadrobregmus denticollis	Hadrobregmus	Genus	BOLD:AAO1095	8	Anobium[5], Hadrobregmus[4]						GMGMA1375-14	Diptera	Cecidomyiidae	Family	BOLD:AAY6445	15			GMGMB1232-14	Hymenoptera	Ichneumonidae	Family	BOLD:ACQ9468
GMGML067-14	Coleoptera	Leptura maculata	Leptura	Genus	BOLD:AAE6807	39	Leptura[32], Rutpela[6]						GMGRG3415-13	Diptera	Cecidomyiidae	Family	BOLD:AAY6448	81			GMGMB1565-14	Diptera	Sciaridae	Family	BOLD:ACR0169
GMGMK947-14	Coleoptera	Aleocharinae	NO TAXONOMY	Genus	BOLD:AAO0293	8	Gyrophaena[3], Atheta[2]						GMGML525-14	Diptera	Sciaridae	Family	BOLD:AAZ5626	281			GMGMB1313-14	Diptera	Sphaeroceridae	Family	BOLD:ACQ9591
GMGMC473-14	Coleoptera	Aleocharinae	NO TAXONOMY	Genus	BOLD:AAO4549	20	Gyrophaena[6], Atheta[1]						GMGMI729-14	Diptera	Phoridae	Family	BOLD:ABA6991	84			GMGMD655-14	Diptera	Agromyzidae	Family	BOLD:ACR0357
GMGMN797-14	Coleoptera	Entiminae	NO TAXONOMY	Genus	BOLD:AAG5244	90	Phyllobius[77], Polydrusus[14]						GMGMC1336-14	Diptera	Cecidomyiidae	Family	BOLD:ABA7870	80			GMGMD780-14	Diptera	Cecidomyiidae	Family	BOLD:ACR0427
GMGRA1618-13	Coleoptera	Entiminae	NO TAXONOMY	Genus	BOLD:AAN1759	34	Phyllobius[18], Sitona[3], Tanymecus[1], Cyphocleonus[1], Omias[1]						GMGRE1805-13	Diptera	Cecidomyiidae	Family	BOLD:ABV0448	122			GMGMD1351-14	Diptera	Cecidomyiidae	Family	BOLD:ACR3505
GMGME244-14	Coleoptera	Platystomos albinus	Platystomos	Genus	BOLD:AAP7159	28	Platystomos[25], Anthribus[3]						GMGRD1429-13	Diptera	Cecidomyiidae	Family	BOLD:ABV0466	16			GMGMD877-14	Diptera	Cecidomyiidae	Family	BOLD:ACR0961
GMGME161-14	Coleoptera	Rhynchaenus fagi	Rhynchaenus	Genus	BOLD:AAK5387	65	Orchestes[42], Rhynchaenus[29], Isochnus[1]						GMGMB1327-14	Diptera	Cecidomyiidae	Family	BOLD:ABV0498	36			GMGMD1269-14	Diptera	Cecidomyiidae	Family	BOLD:ACR3545
GMGMG185-14	Coleoptera	Squamapion flavimanum	Squamapion	Genus	BOLD:ACD0357	9	Squamapion[8], Protapion[1]						GMGRH1175-13	Diptera	Cecidomyiidae	Family	BOLD:ABV1375	83			GMGMD728-14	Diptera	Cecidomyiidae	Family	BOLD:ACR0093
GMGRC2662-13	Coleoptera	Stenurella melanura	Stenurella	Genus	BOLD:AAP7171	56	Stenurella[54], Acmaeops[1]						GMGMM819-14	Diptera	Cecidomyiidae	Family	BOLD:ABW0442	8			GMGMD1317-14	Diptera	Cecidomyiidae	Family	BOLD:ACR3523
GMGMG760-14	Coleoptera	Stictoleptura rubra	Stictoleptura	Genus	BOLD:AAJ8299	8	Corymbia[5], Stictoleptura[2], Aredolpona[1]						GMGMA1584-14	Diptera	Cecidomyiidae	Family	BOLD:ABW5559	216			GMGMD1580-14	Diptera	Chironomidae	Family	BOLD:ACR1613
GMGRC3034-13	Coleoptera	Tachyta nana	Tachyta	Genus	BOLD:AAL6600	24	Tachyta[22], Trichocellus[1]						GMGRC976-13	Diptera	Cecidomyiidae	Family	BOLD:ABW6098	9			GMGMD645-14	Diptera	Chloropidae	Family	BOLD:ACR0786
GMGRE2794-13	Coleoptera	Xyleborinus saxeseni	Xyleborinus	Genus	BOLD:AAB9578	150	Xyleborinus[149], Xyleborus[4]						GMGMI1464-14	Diptera	Cecidomyiidae	Family	BOLD:ABW6099	4			GMGMD1198-14	Hymenoptera	Ichneumonidae	Family	BOLD:ACR2979
GMGMB920-14	Dermaptera	Forficulidae	NO TAXONOMY	Genus	BOLD:ACB5499	14	Chelidura[6], Chelidurella[3]						GMGRG3124-13	Diptera	Cecidomyiidae	Family	BOLD:ABW7906	7			GMGMD1124-14	Hymenoptera	Ichneumonidae	Family	BOLD:ACR2973
GMGRI504-13	Diptera	Admontia grandicornis	Admontia	Genus	BOLD:AAV9893	29	Admontia[4], Phorinia[1], Oswaldia[1]						GMGRG3208-13	Diptera	Cecidomyiidae	Family	BOLD:ABW8057	168			GMGMD435-14	Hymenoptera	Ichneumonidae	Family	BOLD:ACR0061
GMGRC3025-13	Diptera	Aedes geniculatus	Aedes	Genus	BOLD:AAM5898	34	Aedes[30], Dahliana[3], Ochlerotatus[1]						GMGMK1372-14	Diptera	Ceratopogonidae	Family	BOLD:ABW8112	66			GMGMD771-14	Diptera	Mycetophilidae	Family	BOLD:ACR0954
GMGMH546-14	Diptera	Bothria subalpina	Bothria	Genus	BOLD:ACB0930	15	Bothria[22], Botria[1]						GMGMA1421-14	Diptera	Cecidomyiidae	Family	BOLD:ABX0130	49			GMGMD1553-14	Diptera	Phoridae	Family	BOLD:ACR2003
GMGRC3080-13	Diptera	Cephalops	Cephalops	Genus	BOLD:ABY4074	23	Cephalops[13], Dasydorylas[1]						GMGMM1536-14	Diptera	Agromyzidae	Family	BOLD:ABX0204	3			GMGMD1309-14	Diptera	Phoridae	Family	BOLD:ACR2907
GMGMM499-14	Diptera	Cephalops	Cephalops	Genus	BOLD:AAI7554	32	Cephalops[20], Tomosvaryella[1]						GMGMJ1083-14	Diptera	Lauxaniidae	Family	BOLD:ABX3096	23			GMGMD1098-14	Diptera	Psychodidae	Family	BOLD:ACR0729
GMGRI473-13	Diptera	Chaetorellia	Chaetorellia	Genus	BOLD:AAB3256	14	Chaetorellia[12], Chaetostomella[1]						GMGRB1305-13	Diptera	Cecidomyiidae	Family	BOLD:ABX4964	15			GMGME138-14	Diptera	Asilidae	Family	BOLD:ACR3099
GMGRE2808-13	Diptera	Chromatomyia fuscula	Chromatomyia	Genus	BOLD:AAJ5430	126	Chromatomyia[101], Phytomyza[4]						GMGMB085-14	Diptera	Cecidomyiidae	Family	BOLD:ABX7961	20			GMGME890-14	Diptera	Cecidomyiidae	Family	BOLD:ACR0351
GMGMA1396-14	Diptera	Chromatomyia horticola	Chromatomyia	Genus	BOLD:ABU6382	51	Chromatomyia[41], Liriomyza[4]						GMGRG2405-13	Diptera	Cecidomyiidae	Family	BOLD:ABX9178	43			GMGME733-14	Diptera	Cecidomyiidae	Family	BOLD:ACR0340
GMGRB1481-13	Diptera	Conops vesicularis	Conops	Genus	BOLD:AAN1059	13	Conops[12], Conopa[1]						GMGRD1251-13	Diptera	Cecidomyiidae	Family	BOLD:ABY1983	387			GMGME1000-14	Diptera	Cecidomyiidae	Family	BOLD:ACR1420
GMGMF486-14	Diptera	Dasyopa triangulata	Dasyopa	Genus	BOLD:AAG1518	496	Dasyopa[176], Trachysiphonella[2]						GMGMA1324-14	Diptera	Sciaridae	Family	BOLD:ACA5300	23			GMGME863-14	Diptera	Cecidomyiidae	Family	BOLD:ACR0667
GMGMM1120-14	Diptera	Dinera ferina	Dinera	Genus	BOLD:AAV6797	29	Dinera[25], Tachina[1]						GMGRG4719-13	Diptera	Cecidomyiidae	Family	BOLD:ACA8582	69			GMGME945-14	Diptera	Cecidomyiidae	Family	BOLD:ACR2022
GMGMN1065-14	Diptera	Dryomyza anilis	Dryomyza	Genus	BOLD:ABW1932	12	Dryomyza[10], Neuroctena[2]						GMGRA731-13	Diptera	Cecidomyiidae	Family	BOLD:ACA8829	8			GMGME1314-14	Diptera	Cecidomyiidae	Family	BOLD:ACR1818
GMGRC1428-13	Diptera	Egle	Egle	Genus	BOLD:ACG3973	3	Egle[2], Chirosia[1]						GMGMB1546-14	Diptera	Cecidomyiidae	Family	BOLD:ACA9188	19			GMGME631-14	Diptera	Cecidomyiidae	Family	BOLD:ACR1182
GMGRA403-13	Diptera	Epistrophe euchromus	Epistrophe	Genus	BOLD:AAZ1955	27	Epistrophella[13], Epistrophe[10]						GMGRF5972-13	Diptera	Cecidomyiidae	Family	BOLD:ACA9976	137			GMGME1260-14	Diptera	Cecidomyiidae	Family	BOLD:ACR1586
GMGMC332-14	Diptera	Episyrphus balteatus	Episyrphus	Genus	BOLD:ACF2414	305	Episyrphus[262], Episyphus[14], Epistrophe[1]						GMGRH1448-13	Diptera	Cecidomyiidae	Family	BOLD:ACB0632	12			GMGME1166-14	Diptera	Cecidomyiidae	Family	BOLD:ACR1115
GMGMH529-14	Diptera	Eumerus	Eumerus	Genus	BOLD:AAG4654	44	Eumerus[29], Pipizella[1]						GMGRF4037-13	Diptera	Cecidomyiidae	Family	BOLD:ACB0652	16			GMGME1447-14	Diptera	Cecidomyiidae	Family	BOLD:ACU9439
GMGRA1696-13	Diptera	Eupeodes	Eupeodes	Genus	BOLD:AAB2384	766	Eupeodes[665], Metasyrphus[1]						GMGMB1151-14	Diptera	Cecidomyiidae	Family	BOLD:ACB0663	7			GMGME1383-14	Diptera	Cecidomyiidae	Family	BOLD:ACR1367
GMGMM212-14	Diptera	Exechiopsis contaminata	Exechiopsis	Genus	BOLD:AAP8159	20	Exechiopsis[5], Exechia[4]						GMGRD3257-13	Diptera	Mycetophilidae	Family	BOLD:ACB1111	5			GMGME1505-14	Diptera	Cecidomyiidae	Family	BOLD:ACR0116
GMGMI341-14	Diptera	Fagisyrphus cinctus	Fagisyrphus	Genus	BOLD:AAQ4086	19	Melangyna[11], Fagisyrphus[6], Meliscaeva[1]						GMGRF2955-13	Diptera	Cecidomyiidae	Family	BOLD:ACB1659	32			GMGME1502-14	Diptera	Ceratopogonidae	Family	BOLD:ACR1614
GMGMJ683-14	Diptera	Ferdinandea	Ferdinandea	Genus	BOLD:AAJ0402	27	Ferdinandea[29], Heringia[1]						GMGRC2601-13	Diptera	Mycetophilidae	Family	BOLD:ACB2068	5			GMGME1011-14	Diptera	Ceratopogonidae	Family	BOLD:ACR1522
GMGMJ702-14	Diptera	Gymnosoma	Gymnosoma	Genus	BOLD:ACO3996	49	Gymnosoma[41], Macquartia[1], Admontia[1]						GMGRD730-13	Diptera	Mycetophilidae	Family	BOLD:ACB2124	2			GMGME416-14	Diptera	Chironomidae	Family	BOLD:ACR1708
GMGMJ741-14	Diptera	Helina evecta	Helina	Genus	BOLD:ACB3279	27	Helina[18], Azelia[1]						GMGRE1872-13	Diptera	Cecidomyiidae	Family	BOLD:ACB2627	118			GMGME1556-14	Hemiptera	Cicadellidae	Family	BOLD:ACR2360
GMGMF1580-14	Diptera	Helina impuncta	Helina	Genus	BOLD:AAX1493	24	Helina[17], Mydaea[1]						GMGRE156-13	Diptera	Hybotidae	Family	BOLD:ACB6879	20			GMGME506-14	Hemiptera	Cicadellidae	Family	BOLD:ACR2976
GMGRH276-13	Diptera	Heringia	Heringia	Genus	BOLD:AAG4653	122	Heringia[99], Triglyphus[1], Neocnemodon[1]						GMGRF906-13	Diptera	Cecidomyiidae	Family	BOLD:ACB8836	1			GMGME351-14	Hymenoptera	Eulophidae	Family	BOLD:ACR1342
GMGMB778-14	Diptera	Heteromyza rotundicornis	Heteromyza	Genus	BOLD:ACD3128	59	Heteromyza[21], Tephrochlamys[1]						GMGRC2816-13	Diptera	Cecidomyiidae	Family	BOLD:ACB9083	11			GMGME446-14	Diptera	Hybotidae	Family	BOLD:ACR2012
GMGMH299-14	Diptera	Hydrotaea militaris	Hydrotaea	Genus	BOLD:AAG1771	149	Hydrotaea[125], Hebecnema[1]						GMGRD553-13	Diptera	Cecidomyiidae	Family	BOLD:ACB9757	54			GMGME184-14	Hymenoptera	Ichneumonidae	Family	BOLD:ACR1783
GMGML253-14	Diptera	Leptopeza flavipes	Leptopeza	Genus	BOLD:ACE2329	10	Leptopeza[9], Ocydromia[1]						GMGRC1324-13	Diptera	Cecidomyiidae	Family	BOLD:ACB9780	10			GMGME218-14	Hymenoptera	Ichneumonidae	Family	BOLD:ACR1396
GMGRB1508-13	Diptera	Leucostoma	Leucostoma	Genus	BOLD:AAZ4770	67	Leucostoma[41], Actia[1]						GMGRG4624-13	Diptera	Cecidomyiidae	Family	BOLD:ACB9805	5			GMGME369-14	Hymenoptera	Ichneumonidae	Family	BOLD:ACR1461
GMGMJ738-14	Diptera	Limonia quadrimaculata	Limonia	Genus	BOLD:AAX5093	6	Metalimnobia[4], Limonia[2]						GMGMM583-14	Diptera	Anthomyiidae	Family	BOLD:ACB9812	7			GMGME373-14	Hymenoptera	Ichneumonidae	Family	BOLD:ACR1573
GMGMK1126-14	Diptera	Lypha	Lypha	Genus	BOLD:AAF6259	147	Lypha[49], Winthemia[1], Campylocheta[1]						GMGRG584-13	Diptera	Cecidomyiidae	Family	BOLD:ACB9832	5			GMGME325-14	Hymenoptera	Ichneumonidae	Family	BOLD:ACR1423
GMGMA810-14	Diptera	Medina	Medina	Genus	BOLD:AAG6902	71	Medina[51], Wagneria[1], Eurysthaea[1]						GMGRC970-13	Diptera	Phoridae	Family	BOLD:ACB9833	22			GMGME1210-14	Diptera	Keroplatidae	Family	BOLD:ACR1391
GMGMI510-14	Diptera	Meigenia	Meigenia	Genus	BOLD:AAN9761	50	Meigenia[31], Exorista[1]						GMGRF318-13	Diptera	Cecidomyiidae	Family	BOLD:ACB9928	6			GMGME585-14	Diptera	Phoridae	Family	BOLD:ACR1563
GMGMK506-14	Diptera	Microsoma exiguum	Microsoma	Genus	BOLD:ACB0186	17	Microsoma[12], Ernestia[1]						GMGRB1559-13	Diptera	Cecidomyiidae	Family	BOLD:ACB9937	71			GMGME301-14	Hymenoptera	Platygastridae	Family	BOLD:ACR1143
GMGMK681-14	Diptera	Mouffetina	Mouffetina	Genus	BOLD:ACF9726	10	Cratyna[6], Mouffetina[4]						GMGRE1355-13	Diptera	Cecidomyiidae	Family	BOLD:ACC0008	68			GMGME1227-14	Diptera	Psilidae	Family	BOLD:ACR1472
GMGMC1556-14	Diptera	Myathropa	Myathropa	Genus	BOLD:AAP9713	20	Myathropa[19], Mallota[2]						GMGRE1927-13	Diptera	Phoridae	Family	BOLD:ACC0076	41			GMGME842-14	Diptera	Sciaridae	Family	BOLD:ACR0949
GMGRG4857-13	Diptera	Mycetophila fungorum	Mycetophila	Genus	BOLD:AAG4872	1645	Mycetophila[1226], Exechia[1]						GMGRE1888-13	Diptera	Cecidomyiidae	Family	BOLD:ACC0091	9			GMGME690-14	Diptera	Sciaridae	Family	BOLD:ACR0147
GMGME1223-14	Diptera	Mycetophila fungorum	Mycetophila	Genus	BOLD:ABU7342	142	Mycetophila[128], Mycomya[1]						GMGRB949-13	Diptera	Cecidomyiidae	Family	BOLD:ACC0177	26			GMGMF1087-14	Mesostigmata	Ascidae	Family	BOLD:ACR2930
GMGMJ690-14	Diptera	Limosininae	NO TAXONOMY	Genus	BOLD:AAN6409	32	Rachispoda[5], Minilimosina[1]						GMGRC2835-13	Diptera	Cecidomyiidae	Family	BOLD:ACC0251	12			GMGMF1147-14	Hemiptera	Cicadellidae	Family	BOLD:ACR5105
GMGMC1558-14	Diptera	Oscinellinae	NO TAXONOMY	Genus	BOLD:ACB4411	19	Incertella[7], Oscinimorpha[2]						GMGRD491-13	Diptera	Cecidomyiidae	Family	BOLD:ACC0326	48			GMGMF1395-14	Diptera	Mycetophilidae	Family	BOLD:ACR1692
GMGRF196-13	Diptera	Tachinidae	NO TAXONOMY	Genus	BOLD:ACB0954	10	Epicampocera[6], Voria[1], Lydella[1]						GMGRE503-13	Diptera	Phoridae	Family	BOLD:ACC0351	26			GMGMF1102-14	Mesostigmata	Parasitidae	Family	BOLD:ACR2956
GMGMC1167-14	Diptera	Syrphinae	NO TAXONOMY	Genus	BOLD:AAY3612	67	Pipizella[35], Trichopsomyia[1], Merodon[1]						GMGRG4066-13	Diptera	Cecidomyiidae	Family	BOLD:ACC0397	13			GMGMF535-14	Diptera	Phoridae	Family	BOLD:ACR0598
GMGME607-14	Diptera	Calliphoridae	NO TAXONOMY	Genus	BOLD:ACQ1337	101	Lucilia[93], Chrysomya[1]						GMGRD1101-13	Diptera	Cecidomyiidae	Family	BOLD:ACC0749	49			GMGMG801-14	Diptera	Chironomidae	Family	BOLD:ACR1743
GMGML1359-14	Diptera	Empidinae	NO TAXONOMY	Genus	BOLD:ACR2678	5	Hilara[2], Empis[1]						GMGRB932-13	Diptera	Cecidomyiidae	Family	BOLD:ACC0880	10			GMGMG1409-14	Diptera	Ephydridae	Family	BOLD:ACR3587
GMGMA091-14	Diptera	Phasiinae	NO TAXONOMY	Genus	BOLD:AAO0884	13	Ectophasia[10], Triarthria[1]						GMGRG4562-13	Diptera	Cecidomyiidae	Family	BOLD:ACC1229	3			GMGMG1239-14	Hymenoptera	Ichneumonidae	Family	BOLD:ACR2087
GMGMI1172-14	Diptera	Exoristinae	NO TAXONOMY	Genus	BOLD:ACB0795	4	Blepharipa[2], Tachina[1]						GMGRD1125-13	Diptera	Cecidomyiidae	Family	BOLD:ACC1290	9			GMGMG1204-14	Hymenoptera	Ichneumonidae	Family	BOLD:ACR3696
GMGMK297-14	Diptera	Exoristinae	NO TAXONOMY	Genus	BOLD:ACM5356	6	Leiophora[1], Admontia[1]						GMGRC982-13	Diptera	Cecidomyiidae	Family	BOLD:ACC1325	23			GMGMA1524-14	Hymenoptera	Cryptinae	Subfamily	BOLD:ACQ8827
GMGMD725-14	Diptera	Pipunculinae	NO TAXONOMY	Genus	BOLD:AAI4097	7	Eudorylas[1], Clistoabdominalis[1]						GMGRC2827-13	Diptera	Cecidomyiidae	Family	BOLD:ACC1372	108			GMGMA1447-14	Hymenoptera	Ichneumoninae	Subfamily	BOLD:ACQ8882
GMGMJ739-14	Diptera	Anthomyiinae	NO TAXONOMY	Genus	BOLD:AAG2468	69	Botanophila[18], Hylemya[1]						GMGRD1300-13	Diptera	Cecidomyiidae	Family	BOLD:ACC1379	2			GMGMC1097-14	Diptera	Cecidomyiinae	Subfamily	BOLD:ACQ9064
GMGMF112-14	Diptera	Norellisoma spinimanum	Norellisoma	Genus	BOLD:ACD3336	20	Norellisoma[11], Norellia[7]						GMGRB1756-13	Diptera	Cecidomyiidae	Family	BOLD:ACC1396	12			GMGMB646-14	Hymenoptera	Campopleginae	Subfamily	BOLD:ACR3322
GMGMJ725-14	Diptera	Nowickia ferox	Nowickia	Genus	BOLD:AAK1389	58	Nowickia[57], Tachina[1]						GMGRF5185-13	Diptera	Cecidomyiidae	Family	BOLD:ACC1421	7			GMGMB1243-14	Hymenoptera	Orthocentrinae	Subfamily	BOLD:ACQ9228
GMGRC1874-13	Diptera	Ozirhincus	Ozirhincus	Genus	BOLD:ABV1411	69	Ozirhincus[66], Asphondylia[2]						GMGRB1325-13	Diptera	Cecidomyiidae	Family	BOLD:ACC1469	28			GMGMD1170-14	Hymenoptera	Alysiinae	Subfamily	BOLD:ACR2827
GMGMI530-14	Diptera	Ozirhincus tanaceti	Ozirhincus	Genus	BOLD:ACD8681	38	Ozirhincus[33], Asphondylia[4]						GMGRD907-13	Diptera	Cecidomyiidae	Family	BOLD:ACC1470	15			GMGMD277-14	Hymenoptera	Banchinae	Subfamily	BOLD:ACR1624
GMGMD205-14	Diptera	Ozirhincus	Ozirhincus	Genus	BOLD:ACQ8893	15	Ozirhincus[14], Asphondylia[1]						GMGRH1134-13	Diptera	Cecidomyiidae	Family	BOLD:ACC1498	2			GMGME180-14	Hymenoptera	Cryptinae	Subfamily	BOLD:ACR1213
GMGMF438-14	Diptera	Pachygaster atra	Pachygaster	Genus	BOLD:ABV3418	4	Pachygaster[2], Eupachygaster[2]						GMGRG1483-13	Diptera	Cecidomyiidae	Family	BOLD:ACC1591	3			GMGMA092-14	Hymenoptera	Aprostocetus	Genus	BOLD:ACU1170
GMGMI338-14	Diptera	Palloptera modesta	Palloptera	Genus	BOLD:ACB4053	6	Palloptera[3], Toxoneura[1]						GMGMC1512-14	Diptera	Cecidomyiidae	Family	BOLD:ACC1592	5			GMGMA1460-14	Hymenoptera	Bracon	Genus	BOLD:ACQ9434
GMGME781-14	Diptera	Parasyrphus malinellus	Parasyrphus	Genus	BOLD:ACE7870	13	Parasyrphus[11], Epistrophe[1]						GMGRB1349-13	Diptera	Cecidomyiidae	Family	BOLD:ACC1599	15			GMGMA1291-14	Diptera	Cricotopus	Genus	BOLD:ACQ9824
GMGMG655-14	Diptera	Parasyrphus malinellus	Parasyrphus	Genus	BOLD:AAL3233	66	Parasyrphus[53], Meliscaeva[1]						GMGMB1116-14	Diptera	Cecidomyiidae	Family	BOLD:ACC1610	127			GMGMA134-14	Hymenoptera	Trioxys	Genus	BOLD:ACQ9881
GMGMM195-14	Diptera	Phania funesta	Phania	Genus	BOLD:ACO3978	89	Phania[83], Phebellia[1], Nowickia[1]						GMGRD1311-13	Diptera	Cecidomyiidae	Family	BOLD:ACC1662	15			GMGMC939-14	Hymenoptera	Alloxysta	Genus	BOLD:ACR0971
GMGMC1448-14	Diptera	Phorinia aurifrons	Phorinia	Genus	BOLD:ACO3991	13	Phorinia[12], Phorocera[1], Admontia[1]						GMGRG1688-13	Diptera	Cecidomyiidae	Family	BOLD:ACC1742	3			GMGMC956-14	Hymenoptera	Cotesia	Genus	BOLD:ACR0973
GMGMC1587-14	Diptera	Phytomyptera zonella	Phytomyptera	Genus	BOLD:ACB0100	8	Phytomyptera[6], Elfia[2]						GMGRE1544-13	Diptera	Cecidomyiidae	Family	BOLD:ACC1753	18			GMGMC1384-14	Hymenoptera	Bracon	Genus	BOLD:ACR0364
GMGMC1280-14	Diptera	Pipunculus	Pipunculus	Genus	BOLD:AAD0917	27	Pipunculus[16], Clistoabdominalis[1]						GMGRH1305-13	Diptera	Cecidomyiidae	Family	BOLD:ACC1754	9			GMGMC403-14	Hymenoptera	Bracon	Genus	BOLD:ACR0706
GMGMN717-14	Diptera	Platycheirus	Platycheirus	Genus	BOLD:AAL7898	104	Platycheirus[97], Melanostoma[1], Eristalis[1]						GMGMI546-14	Diptera	Cecidomyiidae	Family	BOLD:ACC5341	3			GMGMC1390-14	Hymenoptera	Chlorocytes	Genus	BOLD:ACR0299
GMGRB1501-13	Diptera	Platycheirus	Platycheirus	Genus	BOLD:AAA9506	357	Platycheirus[336], Melanostoma[1]						GMGRG1705-13	Diptera	Cecidomyiidae	Family	BOLD:ACC5597	2			GMGMD488-14	Hymenoptera	Aprostocetus	Genus	BOLD:ACR7205
GMGRB1516-13	Diptera	Platymya	Platymya	Genus	BOLD:AAG2162	67	Platymya[48], Actia[1]						GMGRF1287-13	Diptera	Cecidomyiidae	Family	BOLD:ACC5649	17			GMGMD1158-14	Hymenoptera	Diadegma	Genus	BOLD:ACR3213
GMGMI575-14	Diptera	Prochyliza varipes	Prochyliza	Genus	BOLD:AAG1789	28	Liopiophila[37], Prochyliza[5]						GMGRF229-13	Diptera	Cecidomyiidae	Family	BOLD:ACC5663	4			GMGMD1231-14	Diptera	Xylota	Genus	BOLD:ACR1228
GMGMD086-14	Diptera	Psychoda alternata	Psychoda	Genus	BOLD:AAF9306	363	Psychoda[30], PsychodidGC[3], PsychGn1[2]						GMGRE244-13	Diptera	Phoridae	Family	BOLD:ACC5701	10			GMGME366-14	Hymenoptera	Diadegma	Genus	BOLD:ACR1566
GMGMN1038-14	Diptera	Rachispoda	Rachispoda	Genus	BOLD:AAG7312	166	Spelobia[23], Rachispoda[9]						GMGMJ992-14	Diptera	Phoridae	Family	BOLD:ACC5871	13			GMGME773-14	Diptera	Fannia	Genus	BOLD:ACR0218
GMGMM1141-14	Diptera	Rachispoda	Rachispoda	Genus	BOLD:ABV1408	8	Rachispoda[4], Pseudocollinella[1]						GMGRF1488-13	Diptera	Cecidomyiidae	Family	BOLD:ACC5872	79			GMGME363-14	Hymenoptera	Opius	Genus	BOLD:ACR1374
GMGMM1571-14	Diptera	Rhopalopterum carbonarium	Rhopalopterum	Genus	BOLD:AAP3813	75	Rhopalopterum[58], Incertella[2]						GMGRF431-13	Diptera	Keroplatidae	Family	BOLD:ACC5977	22			GMGME326-14	Hymenoptera	Trichopria	Genus	BOLD:ACV1067
GMGMD776-14	Diptera	Scaeva	Scaeva	Genus	BOLD:AAJ6020	29	Scaeva[27], Leucozona[1]						GMGRF197-13	Diptera	Phoridae	Family	BOLD:ACC5986	3			GMGMG1217-14	Hymenoptera	Aprostocetus	Genus	BOLD:ACR7296
GMGMC130-14	Diptera	Sphaerophoria	Sphaerophoria	Genus	BOLD:AAA7374	1349	Sphaerophoria[1019], Schiodon[3], Platycheirus[1]						GMGRB1317-13	Diptera	Cecidomyiidae	Family	BOLD:ACC6265	13			GMGMA884-14	Diptera	Dolichophorus kerteszi	Species	BOLD:ACQ9539
GMGRG3294-13	Diptera	Suillia atricornis	Suillia	Genus	BOLD:AAG0459	760	Suillia[618], Allophyla[4]						GMGRD1928-13	Diptera	Cecidomyiidae	Family	BOLD:ACC6403	3			GMGMA100-14	Diptera	Trachysiphonella scutellata	Species	BOLD:ACQ9206
GMGMB1553-14	Diptera	Syrphus	Syrphus	Genus	BOLD:AAA4570	235	Syrphus[193], Xanthandrus[1], Parasyrphus[1]						GMGRC994-13	Diptera	Cecidomyiidae	Family	BOLD:ACC6477	15			GMGMC408-14	Hymenoptera	Dacnusa sibirica	Species	BOLD:ACU0573
GMGMC1203-14	Diptera	Syrphus	Syrphus	Genus	BOLD:AAB5577	183	Syrphus[159], Epistrophe[2]						GMGRH510-13	Diptera	Phoridae	Family	BOLD:ACC7545	3			GMGMC103-14	Diptera	Leopoldius coronatus	Species	BOLD:ACR0660
GMGRD2657-13	Diptera	Tachina fera	Tachina	Genus	BOLD:ABW2498	28	Tachina[26], Phania[1], Oswaldia[1]						GMGRF1881-13	Diptera	Phoridae	Family	BOLD:ACC7916	8			GMGMC1029-14	Hymenoptera	Sphecodes miniatus	Species	BOLD:ACR0222
GMGMM259-14	Diptera	Themira annulipes	Themira	Genus	BOLD:AAZ5973	35	Themira[27], Enicita[2]						GMGRB1312-13	Diptera	Cecidomyiidae	Family	BOLD:ACD9507	3			GMGMC1538-14	Diptera	Tricimba cincta	Species	BOLD:ACU0837
GMGME1417-14	Diptera	Tolmerus atricapillus	Tolmerus	Genus	BOLD:ACI9053	17	Tolmerus[9], Machimus[7]						GMGRA1076-13	Diptera	Orthocladiinae	Family	BOLD:ACD9509	110			GMGMB868-14	Hymenoptera	Alloxysta victrix	Species	BOLD:ACQ9249
GMGMJ704-14	Diptera	Toxoneura	Toxoneura	Genus	BOLD:ACQ9316	8	Palloptera[6], Toxoneura[2]						GMGRA1012-13	Diptera	Phoridae	Family	BOLD:ACD9573	1132			GMGMB095-14	Diptera	Tricimba cincta	Species	BOLD:ACR0655
GMGRH1834-13	Diptera	Triarthria setipennis	Triarthria	Genus	BOLD:ACO3992	43	Triarthria[34], Ceromya[1]						GMGRA1099-13	Diptera	Cecidomyiidae	Family	BOLD:ACD9574	29			GMGMH1238-14	Hemiptera	Hemiptera	Order	BOLD:ACR4722
GMGMJ714-14	Diptera	Voria ruralis	Voria	Genus	BOLD:ACO3985	16	Voria[12], Ectophasia[1]						GMGMJ1020-14	Diptera	Empididae	Family	BOLD:ACD9582	547			GMGMI458-14	Hymenoptera	Hymenoptera	Order	BOLD:ACR3659
GMGMI141-14	Diptera	Xylota sylvarum	Xylota	Genus	BOLD:AAZ8002	16	Xylota[20], Xanthogramma[1]						GMGRA1130-13	Diptera	Phoridae	Family	BOLD:ACD9606	226			GMGMJ1491-14	Mesostigmata	Mesostigmata	Order	BOLD:ACR4258
GMGMH1271-14	Diptera	Zygoneura sciarina	Zygoneura	Genus	BOLD:ACC1760	19	Zygoneura[15], Corynoptera[1]						GMGRA1336-13	Diptera	Chloropidae	Family	BOLD:ACD9614	45			GMGML1591-14	Hemiptera	Hemiptera	Order	BOLD:ACS2510
GMGMN200-14	Hemiptera	Acyrthosiphon pisum	Acyrthosiphon	Genus	BOLD:AAB1787	245	Acyrthosiphon[211], Rhopalosiphum[1]						GMGRC331-13	Diptera	Phoridae	Family	BOLD:ACE0332	49			GMGMN542-14	Hymenoptera	Hymenoptera	Order	BOLD:ACR7359
GMGMC256-14	Hemiptera	Aphis	Aphis	Genus	BOLD:AAA5565	615	Aphis[614], Macrosiphoniella[1]						GMGRA966-13	Diptera	Cecidomyiidae	Family	BOLD:ACE0458	6			GMGRB1143-13	Sarcoptiformes	Sarcoptiformes	Order	BOLD:ACF7351
GMGMC837-14	Hemiptera	Deltocephalus pulicaris	Deltocephalus	Genus	BOLD:AAY8918	15	Deltocephalus[15], Limotettix[1]						GMGRA039-13	Diptera	Ceratopogonidae	Family	BOLD:ACE0461	2			GMGMG1007-14	Diptera	Sciaridae	Family	BOLD:ACR1534
GMGRF3274-13	Hemiptera	Euscelis incisus	Euscelis	Genus	BOLD:ABU8473	10	Euscelis[6], Conosanus[1]						GMGRA1310-13	Diptera	Lauxaniidae	Family	BOLD:ACE0524	3			GMGMG511-14	Diptera	Tephritidae	Family	BOLD:ACR2359
GMGMN1579-14	Hemiptera	Eutettix variabilis	Eutettix	Genus	BOLD:AAV0162	25	Eutettix[23], Allygus[1]						GMGRB912-13	Diptera	Cecidomyiidae	Family	BOLD:ACE0525	2			GMGMH819-14	Diptera	Agromyzidae	Family	BOLD:ACR2316
GMGMJ745-14	Hemiptera	Macrosiphoniella oblonga	Macrosiphoniella	Genus	BOLD:AAP5550	5	Macrosiphoniella[4], Uroleucon[1]						GMGRC532-13	Diptera	Ceratopogonidae	Family	BOLD:ACE1944	18			GMGMH187-14	Diptera	Agromyzidae	Family	BOLD:ACR3102
GMGME148-14	Hemiptera	Macrosiphum rosae	Macrosiphum	Genus	BOLD:AAB4239	127	Macrosiphum[115], Sitobion[3]						GMGRC2529-13	Diptera	Cecidomyiidae	Family	BOLD:ACE2213	2			GMGMH1044-14	Diptera	Agromyzidae	Family	BOLD:ACR3108
GMGMN311-14	Hemiptera	Myzus	Myzus	Genus	BOLD:AAA7683	341	Myzus[317], Sitobion[1], Brevicoryne[1], Aphis[1]						GMGRB1296-13	Diptera	Cecidomyiidae	Family	BOLD:ACE2219	146			GMGMH888-14	Hymenoptera	Braconidae	Family	BOLD:ACR2429
GMGRI095-13	Hemiptera	Oncopsis flavicollis	Oncopsis	Genus	BOLD:ABU9685	6	Oncopsis[5], Macropsis[1]						GMGRD1272-13	Diptera	Cecidomyiidae	Family	BOLD:ACE2294	6			GMGMH1075-14	Diptera	Cecidomyiidae	Family	BOLD:ACR2968
GMGMB1124-14	Hemiptera	Orius insidiosus	Orius	Genus	BOLD:ABA4229	7	Xylocoris[4], Orius[2]						GMGRB822-13	Diptera	Ceratopogonidae	Family	BOLD:ACE2295	9			GMGMH1081-14	Diptera	Cecidomyiidae	Family	BOLD:ACR3653
GMGMC1172-14	Hemiptera	Sitobion	Sitobion	Genus	BOLD:AAB4894	287	Sitobion[269], Rhopalosiphum[1]						GMGRB791-13	Diptera	Phoridae	Family	BOLD:ACE2298	6			GMGMH942-14	Diptera	Cecidomyiidae	Family	BOLD:ACR1900
GMGRC2019-13	Hymenoptera	Acrotomus succinctus	Acrotomus	Genus	BOLD:AAH2187	44	Acrotomus[26], Exenterus[2]						GMGRB775-13	Diptera	Phoridae	Family	BOLD:ACE2642	12			GMGMH773-14	Diptera	Cecidomyiidae	Family	BOLD:ACR2230
GMGMB1087-14	Hymenoptera	Actia lamia	Actia	Genus	BOLD:ABV4561	21	Actia[20], Ceromya[1]						GMGRB665-13	Diptera	Phoridae	Family	BOLD:ACE2643	2			GMGMH1049-14	Diptera	Chloropidae	Family	BOLD:ACR2965
GMGMH969-14	Hymenoptera	Aleiodes	Aleiodes	Genus	BOLD:AAA7795	108	Aleiodes[92], Rogas[2], Aleoides[1]						GMGRB1723-13	Diptera	Phoridae	Family	BOLD:ACE2645	47			GMGMH914-14	Hymenoptera	Cynipidae	Family	BOLD:ACR2428
GMGMJ756-14	Hymenoptera	Allantus	Allantus	Genus	BOLD:AAE6121	66	Allantus[58], Ametastegia[1]						GMGRA1508-13	Diptera	Phoridae	Family	BOLD:ACE2646	15			GMGMH882-14	Hymenoptera	Diapriidae	Family	BOLD:ACR2617
GMGRF1416-13	Hymenoptera	Alloxysta	Alloxysta	Genus	BOLD:AAU8458	55	Alloxysta[44], Xyalaspis[1]						GMGRA1573-13	Diptera	Cecidomyiidae	Family	BOLD:ACE6038	8			GMGMH444-14	Hymenoptera	Ichneumonidae	Family	BOLD:ACR2782
GMGRA209-13	Hymenoptera	Alloxysta	Alloxysta	Genus	BOLD:ACO3622	16	Alloxysta[6], Gronotoma[1]						GMGRA1532-13	Diptera	Ceratopogonidae	Family	BOLD:ACE8242	2			GMGMH458-14	Hymenoptera	Ichneumonidae	Family	BOLD:ACR2358
GMGRA1326-13	Hymenoptera	Ametastegia	Ametastegia	Genus	BOLD:AAE5603	58	Ametastegia[51], Nesoselandria[1], Nematinus[1]						GMGRA1164-13	Diptera	Cecidomyiidae	Family	BOLD:ACE8243	12			GMGMH1380-14	Diptera	Piophilidae	Family	BOLD:ACR3260
GMGRA413-13	Hymenoptera	Annulipes	Annulipes	Genus	BOLD:AAF9914	19	Bassus[1], Annulipes[1]						GMGRF4293-13	Diptera	Cecidomyiidae	Family	BOLD:ACF0010	7			GMGMH871-14	Hymenoptera	Proctotrupidae	Family	BOLD:ACR2245
GMGML458-14	Hymenoptera	Apechthis	Apechthis	Genus	BOLD:AAQ2727	84	Apechthis[79], Coelichneumon[1]						GMGRA1154-13	Diptera	Cecidomyiidae	Family	BOLD:ACF2310	4			GMGMH1397-14	Diptera	Tachinidae	Family	BOLD:ACR2906
GMGRF830-13	Hymenoptera	Aphidius	Aphidius	Genus	BOLD:AAA4188	285	Aphidius[119], Monoctonus[3]						GMGRA1213-13	Diptera	Phoridae	Family	BOLD:ACF2341	22			GMGMI1598-14	Diptera	Agromyzidae	Family	BOLD:ACR3542
GMGMA1266-14	Hymenoptera	Aritranis director	Aritranis	Genus	BOLD:AAG7768	324	Aritranis[158], Agrothereutes[1]						GMGRA1167-13	Diptera	Cecidomyiidae	Family	BOLD:ACF3507	4			GMGMI504-14	Diptera	Agromyzidae	Family	BOLD:ACR3193
GMGMC1505-14	Hymenoptera	Bathythrix pellucidator	Bathythrix	Genus	BOLD:ABA8667	26	Bathythrix[18], Theroscopus[3]						GMGRA1145-13	Diptera	Chloropidae	Family	BOLD:ACF3508	4			GMGMI692-14	Diptera	Agromyzidae	Family	BOLD:ACR3013
GMGMM802-14	Hymenoptera	Binodoxys acalephae	Binodoxys	Genus	BOLD:AAU8585	217	Trioxys[165], Binodoxys[6]						GMGRB1031-13	Diptera	Ceratopogonidae	Family	BOLD:ACF3562	8			GMGMI666-14	Hymenoptera	Bethylidae	Family	BOLD:ACR3410
GMGMD398-14	Hymenoptera	Birka cinereipes	Birka	Genus	BOLD:AAI8569	31	Birka[29], Monophadnus[1], Claremontia[1]						GMGRB066-13	Diptera	Phoridae	Family	BOLD:ACF4704	959			GMGMI871-14	Hymenoptera	Braconidae	Family	BOLD:ACR3114
GMGMM548-14	Hymenoptera	Buathra laborator	Buathra	Genus	BOLD:ABU6899	15	Buathra[11], Meringopus[1]						GMGRA1018-13	Diptera	Anthomyiidae	Family	BOLD:ACF4705	10			GMGMI1523-14	Diptera	Cecidomyiidae	Family	BOLD:ACR3754
GMGRC1730-13	Hymenoptera	Camponotus ligniperdus	Camponotus	Genus	BOLD:AAI6519	74	Camponotus[67], Formica[2]						GMGRB1230-13	Diptera	Phoridae	Family	BOLD:ACF5996	2			GMGMI987-14	Diptera	Cecidomyiidae	Family	BOLD:ACR3596
GMGRB1885-13	Hymenoptera	Chelostoma rapunculi	Chelostoma	Genus	BOLD:AAA7122	22	Chelostoma[28], Hoplitis[1], Heriades[1]						GMGRC1373-13	Diptera	Phoridae	Family	BOLD:ACF6036	88			GMGMI678-14	Diptera	Chironomidae	Family	BOLD:ACR2857
GMGRC1433-13	Hymenoptera	Chrestosema laevicolle	Chrestosema	Genus	BOLD:ACJ0512	7	Chrestosema[2], Rhoptromeris[1]						GMGRC989-13	Diptera	Cecidomyiidae	Family	BOLD:ACF6037	8			GMGMI1244-14	Diptera	Chironomidae	Family	BOLD:ACR3254
GMGRC1612-13	Hymenoptera	Cladius brullei	Cladius	Genus	BOLD:AAG7865	34	Cladius[33], Priophorus[1]						GMGRC983-13	Diptera	Cecidomyiidae	Family	BOLD:ACF6038	19			GMGMI1217-14	Diptera	Empididae	Family	BOLD:ACR2470
GMGMF418-14	Hymenoptera	Collyria	Collyria	Genus	BOLD:AAS0014	22	Collyria[15], Itoplectis[1]						GMGRA1282-13	Diptera	Phoridae	Family	BOLD:ACF6067	2			GMGMI1057-14	Araneae	Eutichuridae	Family	BOLD:ACR4431
GMGRI286-13	Hymenoptera	Conops quadrifasciatus	Conops	Genus	BOLD:AAV9334	11	Conops[9], Physocephala[1]						GMGRC2491-13	Diptera	Cecidomyiidae	Family	BOLD:ACF6112	2			GMGMI1481-14	Diptera	Hybotidae	Family	BOLD:ACR3883
GMGML274-14	Hymenoptera	Cratichneumon culex	Cratichneumon	Genus	BOLD:ACC2867	120	Cratichneumon[119], Crypteffigies[1]						GMGRD2676-13	Diptera	Scatopsidae	Family	BOLD:ACF6113	15			GMGMI1312-14	Diptera	Hybotidae	Family	BOLD:ACR2839
GMGRC1613-13	Hymenoptera	Crypteffigies lanius	Crypteffigies	Genus	BOLD:ABX5376	33	Crypteffigies[33], Oresbius[1]						GMGRD602-13	Diptera	Cecidomyiidae	Family	BOLD:ACF6114	26			GMGMI590-14	Hymenoptera	Ichneumonidae	Family	BOLD:ACR3566
GMGMB1449-14	Hymenoptera	Dacnusa	Dacnusa	Genus	BOLD:AAH3151	16	Dacnusa[4], Dacnusini[1]						GMGRD2303-13	Diptera	Cecidomyiidae	Family	BOLD:ACF6115	13			GMGMI1342-14	Hymenoptera	Ichneumonidae	Family	BOLD:ACR2702
GMGMB729-14	Hymenoptera	Diaeretiella rapae	Diaeretiella	Genus	BOLD:AAG1421	144	Diaeretiella[143], Praon[1], Aphidius[1]						GMGRB1291-13	Diptera	Cecidomyiidae	Family	BOLD:ACF6172	24			GMGMI451-14	Hymenoptera	Ichneumonidae	Family	BOLD:ACR2753
GMGMM287-14	Hymenoptera	Diphyus	Diphyus	Genus	BOLD:AAL2075	24	Diphyus[17], Ichneumon[1]						GMGRC2072-13	Diptera	Phoridae	Family	BOLD:ACF6320	6			GMGMI437-14	Hymenoptera	Ichneumonidae	Family	BOLD:ACR2933
GMGMH317-14	Hymenoptera	Diplazon	Diplazon	Genus	BOLD:AAD1879	307	Diplazon[246], Pimpla[1]						GMGRC2616-13	Diptera	Limoniidae	Family	BOLD:ACF6388	22			GMGMI874-14	Hymenoptera	Ichneumonidae	Family	BOLD:ACR2465
GMGMJ921-14	Hymenoptera	Dolichogenidea	Dolichogenidea	Genus	BOLD:AAC2167	18	Dolichogenidea[15], Apanteles[1]						GMGRD3417-13	Diptera	Keroplatidae	Family	BOLD:ACF6391	2			GMGMI1079-14	Hymenoptera	Ichneumonidae	Family	BOLD:ACR3904
GMGML512-14	Hymenoptera	Dusana subimpressa	Dusana	Genus	BOLD:AAZ9498	20	Dusona[10], Dusana[8]						GMGRC1363-13	Diptera	Cecidomyiidae	Family	BOLD:ACF6538	4			GMGMI1485-14	Diptera	Micropezidae	Family	BOLD:ACR3799
GMGMA404-14	Hymenoptera	Dusona stragifex	Dusona	Genus	BOLD:ABV4816	16	Dusona[14], Dentilabus[1]						GMGRC1362-13	Diptera	Cecidomyiidae	Family	BOLD:ACF6539	3			GMGMI1524-14	Diptera	Mycetophilidae	Family	BOLD:ACR4268
GMGRF6359-13	Hymenoptera	Encrateola	Encrateola	Genus	BOLD:AAI5295	12	Encrateola[4], Eudelus[2], Gelis[1]						GMGRC1353-13	Diptera	Cecidomyiidae	Family	BOLD:ACF6540	30			GMGMI1220-14	Diptera	Phoridae	Family	BOLD:ACR2437
GMGMK509-14	Hymenoptera	Endromopoda detrita	Endromopoda	Genus	BOLD:AAG7621	31	Endromopoda[13], Dimophora[1]						GMGMD1308-14	Diptera	Cecidomyiidae	Family	BOLD:ACF6657	27			GMGMI1581-14	Diptera	Phoridae	Family	BOLD:ACR2755
GMGMJ1192-14	Hymenoptera	Eriothrix rufomaculatus	Eriothrix	Genus	BOLD:AAV7115	24	Eriothrix[23], Thelaira[1]						GMGRC2532-13	Diptera	Cecidomyiidae	Family	BOLD:ACF6805	2			GMGMI1394-14	Hymenoptera	Pteromalidae	Family	BOLD:ACR2266
GMGMB718-14	Hymenoptera	Eusterinx	Eusterinx	Genus	BOLD:AAI5591	81	Eusterinx[57], Orthocentrus[1]						GMGRC2564-13	Diptera	Cecidomyiidae	Family	BOLD:ACF6806	2			GMGMI1509-14	Diptera	Sciaridae	Family	BOLD:ACR4237
GMGMB1102-14	Hymenoptera	Exenterus	Exenterus	Genus	BOLD:ACP9085	7	Cycasis[5], Exenterus[2]						GMGRB1050-13	Diptera	Cecidomyiidae	Family	BOLD:ACF6816	1			GMGMI536-14	Diptera	Sciaridae	Family	BOLD:ACR6354
GMGMD894-14	Hymenoptera	Formica fusca	Formica	Genus	BOLD:AAA4978	208	Formica[157], Tetramorium[1]						GMGRF1737-13	Diptera	Phoridae	Family	BOLD:ACF6817	16			GMGMJ1047-14	Diptera	Agromyzidae	Family	BOLD:ACR3705
GMGRF1356-13	Hymenoptera	Hedychrum niemelai	Hedychrum	Genus	BOLD:AAU1294	47	Hedychrum[46], Hedychridium[2]						GMGRD490-13	Diptera	Cecidomyiidae	Family	BOLD:ACF6943	74			GMGMJ822-14	Hemiptera	Aphididae	Family	BOLD:ACR3135
GMGML801-14	Hymenoptera	Helina reversio	Helina	Genus	BOLD:AAD0642	322	Helina[163], Hydrotaea[3]						GMGRC2024-13	Diptera	Cecidomyiidae	Family	BOLD:ACF6944	2			GMGMJ1497-14	Hymenoptera	Braconidae	Family	BOLD:ACR4632
GMGMG591-14	Hymenoptera	Hepiopelmus	Hepiopelmus	Genus	BOLD:AAI8413	11	Hepiopelmus[9], Barichneumon[1]						GMGRC1529-13	Diptera	Ceratopogonidae	Family	BOLD:ACF6961	3			GMGMJ1452-14	Hymenoptera	Braconidae	Family	BOLD:ACR4264
GMGRA401-13	Hymenoptera	Hoplitis adunca	Hoplitis	Genus	BOLD:AAI1794	9	Hoplitis[8], Osmia[2]						GMGRD758-13	Diptera	Phoridae	Family	BOLD:ACF6985	2			GMGMJ990-14	Diptera	Cecidomyiidae	Family	BOLD:ACR3632
GMGMI1319-14	Hymenoptera	Hybrizon buccatus	Hybrizon	Genus	BOLD:AAI2264	42	Hybrizon[30], Adelognathus[1]						GMGRD606-13	Diptera	Cecidomyiidae	Family	BOLD:ACF7157	16			GMGMJ996-14	Diptera	Cecidomyiidae	Family	BOLD:ACR3445
GMGRE1270-13	Hymenoptera	Ichneumon	Ichneumon	Genus	BOLD:AAD5318	276	Ichneumon[222], Thyrateles[4], Stenichneumon[1]						GMGRB1259-13	Diptera	Cecidomyiidae	Family	BOLD:ACF7173	4			GMGMJ1199-14	Diptera	Cecidomyiidae	Family	BOLD:ACR3752
GMGRC1507-13	Hymenoptera	Isadelphus inimicus	Isadelphus	Genus	BOLD:ABW3340	8	Isadelphus[4], Gnotus[1]						GMGRC1576-13	Diptera	Phoridae	Family	BOLD:ACF7226	3			GMGMJ1488-14	Pseudoscorpiones	Chernetidae	Family	BOLD:ACR4420
GMGRE3469-13	Hymenoptera	Isadelphus	Isadelphus	Genus	BOLD:ABU6464	15	Isadelphus[13], Mastrus[1]						GMGRC393-13	Diptera	Cecidomyiidae	Family	BOLD:ACF7260	2			GMGMJ1489-14	Pseudoscorpiones	Chernetidae	Family	BOLD:ACR4421
GMGRG1907-13	Hymenoptera	Ischnus alternator	Ischnus	Genus	BOLD:AAH1536	43	Ischnus[27], Agrothereutes[1]						GMGMM1164-14	Diptera	Phoridae	Family	BOLD:ACF7263	82			GMGMJ372-14	Coleoptera	Chrysomelidae	Family	BOLD:ACR3271
GMGMG634-14	Hymenoptera	Itoplectis maculator	Itoplectis	Genus	BOLD:AAW9099	52	Itoplectis[49], Diplazon[1]						GMGRD070-13	Diptera	Phoridae	Family	BOLD:ACF7264	55			GMGMJ1155-14	Diptera	Hybotidae	Family	BOLD:ACT8153
GMGRB1890-13	Hymenoptera	Itoplectis alternans	Itoplectis	Genus	BOLD:ABV4030	28	Itoplectis[21], Pimpla[1]						GMGRC743-13	Diptera	Cecidomyiidae	Family	BOLD:ACF7349	7			GMGMJ1399-14	Hymenoptera	Ichneumonidae	Family	BOLD:ACS1551
GMGME617-14	Hymenoptera	Lasioglossum leucozonium	Lasioglossum	Genus	BOLD:AAA2322	216	Lasioglossum[215], Halictus[1]						GMGRB973-13	Diptera	Cecidomyiidae	Family	BOLD:ACF7465	2			GMGMJ659-14	Hymenoptera	Ichneumonidae	Family	BOLD:ACR2887
GMGRC330-13	Hymenoptera	Leipaulus	Leipaulus	Genus	BOLD:AAX5466	17	Leipaulus[4], Plectiscus[2]						GMGRB976-13	Diptera	Chloropidae	Family	BOLD:ACF7466	6			GMGMJ289-14	Hymenoptera	Ichneumonidae	Family	BOLD:ACR2674
GMGRA014-13	Hymenoptera	Leptasis	Leptasis	Genus	BOLD:AAG7883	41	Leptacis[29], Leptasis[10]						GMGRB981-13	Diptera	Cecidomyiidae	Family	BOLD:ACF7467	3			GMGMJ1334-14	Hymenoptera	Ichneumonidae	Family	BOLD:ACR4304
GMGMI131-14	Hymenoptera	Leptasis	Leptasis	Genus	BOLD:ABZ8208	86	Leptacis[45], Leptasis[38]						GMGRG2879-13	Diptera	Cecidomyiidae	Family	BOLD:ACF7552	3			GMGMJ1242-14	Diptera	Phoridae	Family	BOLD:ACR4586
GMGMJ204-14	Hymenoptera	Lydella	Lydella	Genus	BOLD:AAP8653	41	Lydella[32], Platymya[1], Ceromya[1], Bessa[1]						GMGRC1361-13	Diptera	Cecidomyiidae	Family	BOLD:ACF7554	12			GMGMK381-14	Diptera	Agromyzidae	Family	BOLD:ACR2867
GMGMN227-14	Hymenoptera	Macrophya	Macrophya	Genus	BOLD:AAK6380	39	Macrophya[40], Tenthredopsis[1]						GMGRC1350-13	Diptera	Cecidomyiidae	Family	BOLD:ACF7555	51			GMGMK1267-14	Diptera	Agromyzidae	Family	BOLD:ACR3544
GMGMC253-14	Hymenoptera	Melanips opacus	Melanips	Genus	BOLD:AAU8950	35	Melanips[18], Figites[1]						GMGRF4276-13	Diptera	Cecidomyiidae	Family	BOLD:ACF7556	36			GMGMK700-14	Hymenoptera	Braconidae	Family	BOLD:ACR2128
GMGMD074-14	Hymenoptera	Melanostoma	Melanostoma	Genus	BOLD:AAB2866	962	Melanostoma[760], Platycheirus[1]						GMGRC1328-13	Diptera	Cecidomyiidae	Family	BOLD:ACF7675	3			GMGMK1469-14	Hymenoptera	Braconidae	Family	BOLD:ACR4162
GMGMC046-14	Hymenoptera	Meliscaeva cinctella	Meliscaeva	Genus	BOLD:AAD0765	118	Meliscaeva[97], Sphaerophoria[1], Melangyna[1], Epistrophe[1]						GMGRC1352-13	Diptera	Cecidomyiidae	Family	BOLD:ACF7677	18			GMGMK376-14	Diptera	Cecidomyiidae	Family	BOLD:ACR2954
GMGMD223-14	Hymenoptera	Mesoleptus	Mesoleptus	Genus	BOLD:ACF8839	19	Mesoleptus[18], Atractodes[1]						GMGRG1767-13	Diptera	Cecidomyiidae	Family	BOLD:ACF7688	12			GMGMK648-14	Diptera	Cecidomyiidae	Family	BOLD:ACR2439
GMGME1353-14	Hymenoptera	Myrmica ruginodis	Myrmica	Genus	BOLD:AAE0419	326	Myrmica[321], Tetramorium[1]						GMGRC1377-13	Diptera	Phoridae	Family	BOLD:ACF7689	84			GMGMK1424-14	Diptera	Cecidomyiidae	Family	BOLD:ACR3617
GMGMH661-14	Hymenoptera	Ichneumonidae	NO TAXONOMY	Genus	BOLD:ACC0727	23	Picrostigeus[1], Eusterinx[1]						GMGRC564-13	Diptera	Phoridae	Family	BOLD:ACF7704	7			GMGMK644-14	Diptera	Cecidomyiidae	Family	BOLD:ACR3064
GMGMI554-14	Hymenoptera	Ichneumonidae	NO TAXONOMY	Genus	BOLD:AAF0574	29	Gnathochorisis[7], Orthocentrus[1]						GMGMC1331-14	Diptera	Ceratopogonidae	Family	BOLD:ACF7706	12			GMGMK1535-14	Diptera	Cecidomyiidae	Family	BOLD:ACR3779
GMGRG1873-13	Hymenoptera	Ichneumonidae	NO TAXONOMY	Genus	BOLD:ACG5318	16	Stenomacrus[7], Orthocentrus[2]						GMGMC1126-14	Diptera	Cecidomyiidae	Family	BOLD:ACF7766	85			GMGMK1533-14	Diptera	Cecidomyiidae	Family	BOLD:ACR4213
GMGMG448-14	Hymenoptera	Tetrastichinae	NO TAXONOMY	Genus	BOLD:ACR4067	86	Aprostocetus[51], Tetrastichus[3]						GMGRC2833-13	Diptera	Cecidomyiidae	Family	BOLD:ACF7767	71			GMGMK639-14	Diptera	Cecidomyiidae	Family	BOLD:ACR2934
GMGRB684-13	Hymenoptera	Calliphoridae	NO TAXONOMY	Genus	BOLD:AAA7470	454	Lucilia[371], Chrysomya[1]						GMGRB1569-13	Diptera	Cecidomyiidae	Family	BOLD:ACF7768	26			GMGMK1543-14	Diptera	Cecidomyiidae	Family	BOLD:ACR3885
GMGRB1504-13	Hymenoptera	Ichneumonidae	NO TAXONOMY	Genus	BOLD:ACG4724	19	Sympherta[1], Euryproctus[1]						GMGRC2363-13	Diptera	Orthocladiinae	Family	BOLD:ACF7860	2			GMGMK1326-14	Diptera	Chironomidae	Family	BOLD:ACR2474
GMGMC498-14	Hymenoptera	Ichneumonidae	NO TAXONOMY	Genus	BOLD:ACE0915	16	Centeterus[3], Oiorhinus[1]						GMGRD416-13	Diptera	Cecidomyiidae	Family	BOLD:ACF7861	27			GMGMK1350-14	Diptera	Chloropidae	Family	BOLD:ACR2499
GMGRB1479-13	Hymenoptera	Cryptinae	NO TAXONOMY	Genus	BOLD:ABX6817	18	Idiolispa[2], Trychosis[1]						GMGRD2288-13	Diptera	Cecidomyiidae	Family	BOLD:ACF7865	4			GMGMK385-14	Hemiptera	Cicadellidae	Family	BOLD:ACR2796
GMGRF1236-13	Hymenoptera	Helconinae	NO TAXONOMY	Genus	BOLD:AAI4919	9	Eubazus[1], Diospilus[1]						GMGRC430-13	Diptera	Phoridae	Family	BOLD:ACF7950	26			GMGMK389-14	Hemiptera	Cicadellidae	Family	BOLD:ACR2832
GMGRD2770-13	Hymenoptera	Cryptinae	NO TAXONOMY	Genus	BOLD:AAI4432	8	Hoplocryptus[2], Gambrus[1], Aritranis[1]						GMGRE1134-13	Diptera	Cecidomyiidae	Family	BOLD:ACF7975	23			GMGMK568-14	Diptera	Dolichopodidae	Family	BOLD:ACR4100
GMGRD1682-13	Hymenoptera	Cryptinae	NO TAXONOMY	Genus	BOLD:ABU5861	5	Zoophthorus[1], Eudelus[1]						GMGRC1178-13	Diptera	Cecidomyiidae	Family	BOLD:ACF8061	3			GMGMK691-14	Diptera	Drosophilidae	Family	BOLD:ACR2904
GMGMH297-14	Hymenoptera	Diplazontinae	NO TAXONOMY	Genus	BOLD:AAH2172	34	Syrphoctonus[12], Homotropus[9]						GMGRD613-13	Diptera	Cecidomyiidae	Family	BOLD:ACF8063	151			GMGMK1455-14	Hymenoptera	Eulophidae	Family	BOLD:ACR4404
GMGMH1312-14	Hymenoptera	Microgastrinae	NO TAXONOMY	Genus	BOLD:AAB0096	147	Apanteles[60], Dolichogenidea[51]						GMGRD1411-13	Diptera	Cecidomyiidae	Family	BOLD:ACF8064	7			GMGMK1444-14	Diptera	Hybotidae	Family	BOLD:ACR2094
GMGRD2793-13	Hymenoptera	Ichneumoninae	NO TAXONOMY	Genus	BOLD:AAE8983	26	Stenichneumon[13], Lymantrichneumon[4]						GMGRC1198-13	Diptera	Cecidomyiidae	Family	BOLD:ACF8066	3			GMGMK420-14	Hymenoptera	Ichneumonidae	Family	BOLD:ACR4646
GMGMI185-14	Hymenoptera	Microgastrinae	NO TAXONOMY	Genus	BOLD:ACU0329	48	Protapanteles[32], Glyptapanteles[2]						GMGRD1944-13	Diptera	Cecidomyiidae	Family	BOLD:ACF8067	4			GMGMK474-14	Hymenoptera	Ichneumonidae	Family	BOLD:ACR4532
GMGML1342-14	Hymenoptera	Cryptinae	NO TAXONOMY	Genus	BOLD:ACL6735	7	Polytribax[1], Aptesis[1]						GMGRC1056-13	Diptera	Ceratopogonidae	Family	BOLD:ACF8125	7			GMGMK690-14	Diptera	Scathophagidae	Family	BOLD:ACR2769
GMGMN1080-14	Hymenoptera	Braconidae	NO TAXONOMY	Genus	BOLD:AAJ0840	6	Eubazus[2], Brachistes[1]						GMGRC1042-13	Diptera	Cecidomyiidae	Family	BOLD:ACF8126	15			GMGMK672-14	Diptera	Ulidiidae	Family	BOLD:ACR3501
GMGMK1356-14	Hymenoptera	Cryptinae	NO TAXONOMY	Genus	BOLD:AAI3467	8	Theroscopus[3], Orthizema[1]						GMGRC1953-13	Diptera	Cecidomyiidae	Family	BOLD:ACF8500	28			GMGML819-14	Diptera	Agromyzidae	Family	BOLD:ACR4179
GMGMI372-14	Hymenoptera	Braconidae	NO TAXONOMY	Genus	BOLD:AAA6099	134	Cotesia[103], Notiospathius[19]						GMGRC999-13	Diptera	Cecidomyiidae	Family	BOLD:ACF8502	3			GMGML931-14	Hymenoptera	Braconidae	Family	BOLD:ACR3901
GMGMJ730-14	Hymenoptera	Diplazontinae	NO TAXONOMY	Genus	BOLD:AAK1354	15	Syrphoctonus[11], Homotropus[2]						GMGRC1345-13	Diptera	Cecidomyiidae	Family	BOLD:ACF8503	37			GMGML712-14	Diptera	Cecidomyiidae	Family	BOLD:ACR4042
GMGMJ720-14	Hymenoptera	Ctenopelmatinae	NO TAXONOMY	Genus	BOLD:AAE7448	9	Campodorus[3], Scopesis[2]						GMGRC1024-13	Diptera	Cecidomyiidae	Family	BOLD:ACF8505	4			GMGML809-14	Diptera	Cecidomyiidae	Family	BOLD:ACR4098
GMGMN397-14	Hymenoptera	Ichneumoninae	NO TAXONOMY	Genus	BOLD:AAE2634	9	Stenobarichneumon[1], Barichneumon[1]						GMGRC1023-13	Diptera	Phoridae	Family	BOLD:ACF8506	9			GMGML539-14	Diptera	Cecidomyiidae	Family	BOLD:ACR4228
GMGMB946-14	Hymenoptera	Ichneumoninae	NO TAXONOMY	Genus	BOLD:AAI2695	9	Dirophanes[4], Phaeogenes[1]						GMGRB1770-13	Diptera	Ceratopogonidae	Family	BOLD:ACF8682	77			GMGML1370-14	Diptera	Cecidomyiidae	Family	BOLD:ACR4753
GMGMK1417-14	Hymenoptera	Ichneumonidae	NO TAXONOMY	Genus	BOLD:AAH1965	5	Odontocolon[1], Dimophora[1]						GMGRB1281-13	Diptera	Phoridae	Family	BOLD:ACF8764	14			GMGML1319-14	Diptera	Chyromyidae	Family	BOLD:ACR5190
GMGMI1170-14	Hymenoptera	Pimplinae	NO TAXONOMY	Genus	BOLD:AAD5195	51	Pimpla[30], Scambus[3], Endromopoda[2], Tromatobia[1]						GMGMK1276-14	Diptera	Cecidomyiidae	Family	BOLD:ACF8767	3			GMGML1099-14	Hemiptera	Cicadellidae	Family	BOLD:ACR4813
GMGMJ712-14	Hymenoptera	Anthomyiidae	NO TAXONOMY	Genus	BOLD:ABZ9868	19	Paregle[6], Adia[1]						GMGRB1334-13	Diptera	Cecidomyiidae	Family	BOLD:ACF8769	16			GMGML1341-14	Diptera	Dolichopodidae	Family	BOLD:ACR5523
GMGME1333-14	Hymenoptera	Ichneumonidae	NO TAXONOMY	Genus	BOLD:ABV4808	12	Dentilabus[7], Asthenolabus[3], Platylabus[3], Xenoschesis[1]						GMGRC099-13	Diptera	Phoridae	Family	BOLD:ACF8865	24			GMGML870-14	Diptera	Dolichopodidae	Family	BOLD:ACR4158
GMGMH054-14	Hymenoptera	Orthocentrus	Orthocentrus	Genus	BOLD:AAB1188	560	Orthocentrus[365], Helictes[1]						GMGRD3399-13	Diptera	Cecidomyiidae	Family	BOLD:ACF8910	3			GMGML695-14	Hymenoptera	Dryinidae	Family	BOLD:ACR4164
GMGRF1664-13	Hymenoptera	Orthocentrus spurius	Orthocentrus	Genus	BOLD:AAC3876	81	Orthocentrus[68], Stenomacrus[2]						GMGRC403-13	Diptera	Cecidomyiidae	Family	BOLD:ACF9024	12			GMGML973-14	Hymenoptera	Ichneumonidae	Family	BOLD:ACR3817
GMGRI271-13	Hymenoptera	Passaloecus singularis	Passaloecus	Genus	BOLD:AAM4998	33	Passaloecus[37], Crossocerus[1]						GMGRC1359-13	Diptera	Cecidomyiidae	Family	BOLD:ACF9301	6			GMGML183-14	Hymenoptera	Ichneumonidae	Family	BOLD:ACR3740
GMGRI272-13	Hymenoptera	Phobocampe bicingulata	Phobocampe	Genus	BOLD:AAZ9885	7	Phobocampe[2], Hyposoter[2]						GMGRC1405-13	Diptera	Phoridae	Family	BOLD:ACF9392	5			GMGML333-14	Hymenoptera	Ichneumonidae	Family	BOLD:ACR4012
GMGRI481-13	Hymenoptera	Phygadeuon	Phygadeuon	Genus	BOLD:AAI3000	31	Phygadeuon[28], Theroscopus[1]						GMGMD709-14	Diptera	Sphaeroceridae	Family	BOLD:ACF9400	8			GMGML972-14	Hymenoptera	Ichneumonidae	Family	BOLD:ACR4020
GMGMC124-14	Hymenoptera	Picrostigeus recticauda	Picrostigeus	Genus	BOLD:ABV0833	60	Picrostigeus[37], Stenomacrus[2]						GMGRC2779-13	Diptera	Cecidomyiidae	Family	BOLD:ACF9448	2			GMGML970-14	Hymenoptera	Ichneumonidae	Family	BOLD:ACR4454
GMGMJ677-14	Hymenoptera	Pimpla turionellae	Pimpla	Genus	BOLD:AAN3703	45	Pimpla[43], Itoplectis[1]						GMGRD2280-13	Diptera	Cecidomyiidae	Family	BOLD:ACF9578	2			GMGML1545-14	Hymenoptera	Ichneumonidae	Family	BOLD:ACR5078
GMGMC1471-14	Hymenoptera	Pimpla	Pimpla	Genus	BOLD:ABW7229	21	Pimpla[18], Sussaba[1]						GMGRC2496-13	Diptera	Cecidomyiidae	Family	BOLD:ACF9580	35			GMGML1453-14	Hymenoptera	Ichneumonidae	Family	BOLD:ACR4076
GMGMB1339-14	Hymenoptera	Pimpla	Pimpla	Genus	BOLD:AAH9350	54	Pimpla[50], Dolichomitus[1]						GMGRD1307-13	Diptera	Cecidomyiidae	Family	BOLD:ACF9582	24			GMGML892-14	Diptera	Milichiidae	Family	BOLD:ACR4610
GMGMI505-14	Hymenoptera	Polyblastus	Polyblastus	Genus	BOLD:ACC4696	14	Polyblastus[11], Grypocentrus[1]						GMGRD2293-13	Diptera	Cecidomyiidae	Family	BOLD:ACF9583	61			GMGML1051-14	Coleoptera	Mordellidae	Family	BOLD:ACR4234
GMGMI1471-14	Hymenoptera	Praon volucre	Praon	Genus	BOLD:AAE7186	134	Praon[120], Areopraon[1]						GMGML1312-14	Diptera	Empididae	Family	BOLD:ACF9728	11			GMGML760-14	Diptera	Phoridae	Family	BOLD:ACR3985
GMGRF415-13	Hymenoptera	Probles	Probles	Genus	BOLD:ACG4964	6	Barycnemis[4], Probles[1]						GMGRC213-13	Diptera	Ceratopogonidae	Family	BOLD:ACF9779	4			GMGML633-14	Hymenoptera	Platygastridae	Family	BOLD:ACR4373
GMGMB1071-14	Hymenoptera	Rhinotorus similis	Rhinotorus	Genus	BOLD:AAJ4814	20	Dyspetes[16], Rhinotorus[3]						GMGRD828-13	Diptera	Hybotidae	Family	BOLD:ACG0645	308			GMGML766-14	Diptera	Tachinidae	Family	BOLD:ACR4642
GMGMN310-14	Hymenoptera	Sapygina decemguttata	Sapygina	Genus	BOLD:AAO1197	28	Sapygina[22], Sapyga[1]						GMGRD400-13	Diptera	Cecidomyiidae	Family	BOLD:ACG0646	4			GMGMM939-14	Hymenoptera	Braconidae	Family	BOLD:ACR5448
GMGME1416-14	Hymenoptera	Stenomacrus	Stenomacrus	Genus	BOLD:ACF6021	20	Stenomacrus[15], Eusterinx[4]						GMGRD412-13	Diptera	Cecidomyiidae	Family	BOLD:ACG2767	32			GMGMM597-14	Diptera	Cecidomyiidae	Family	BOLD:ACR4876
GMGMC1457-14	Hymenoptera	Sussaba	Sussaba	Genus	BOLD:AAG6192	72	Sussaba[54], Syrphophilus[1]						GMGRD1986-13	Diptera	Cecidomyiidae	Family	BOLD:ACG2820	5			GMGMM836-14	Diptera	Cecidomyiidae	Family	BOLD:ACR5111
GMGRA981-13	Hymenoptera	Sussaba erigator	Sussaba	Genus	BOLD:AAK0097	21	Sussaba[14], Woldstedtius[1], Syrphoctonus[1]						GMGRD1596-13	Diptera	Cecidomyiidae	Family	BOLD:ACG2821	2			GMGMM843-14	Diptera	Cecidomyiidae	Family	BOLD:ACR5316
GMGMK860-14	Hymenoptera	Syrphoctonus	Syrphoctonus	Genus	BOLD:AAH1791	119	Syrphoctonus[76], Homotropus[3]						GMGRC2657-13	Diptera	Keroplatidae	Family	BOLD:ACG2851	4			GMGMM618-14	Diptera	Cecidomyiidae	Family	BOLD:ACR5501
GMGRE2809-13	Hymenoptera	Tranosema rostrale	Tranosema	Genus	BOLD:AAD1926	139	Tranosema[112], Campoplex[3], Enytus[2]						GMGMD1567-14	Diptera	Cecidomyiidae	Family	BOLD:ACG2881	9			GMGMM1226-14	Diptera	Cecidomyiidae	Family	BOLD:ACR5110
GMGMD225-14	Hymenoptera	Virgichneumon tergenus	Virgichneumon	Genus	BOLD:AAJ9859	13	Virgichneumon[11], Spilothyrateles[1], Barichneumon[1]						GMGRD415-13	Diptera	Cecidomyiidae	Family	BOLD:ACG2883	5			GMGMM1419-14	Hemiptera	Cicadellidae	Family	BOLD:ACR5529
GMGRE226-13	Lepidoptera	Acompsia schmidtiellus	Acompsia	Genus	BOLD:AAK0920	11	Acompsia[9], Telephia[1]						GMGRD878-13	Diptera	Cecidomyiidae	Family	BOLD:ACG2884	6			GMGMM907-14	Hymenoptera	Diapriidae	Family	BOLD:ACR5432
GMGRB423-13	Lepidoptera	Acrobasis advenella	Acrobasis	Genus	BOLD:AAC0978	47	Acrobasis[45], Trachycera[1]						GMGRD486-13	Diptera	Cecidomyiidae	Family	BOLD:ACG2885	5			GMGMM1177-14	Diptera	Hybotidae	Family	BOLD:ACR5357
GMGRF3137-13	Lepidoptera	Agriphila inquinatella	Agriphila	Genus	BOLD:AAD2421	8	Agriphila[7], Pediasia[1]						GMGRD571-13	Diptera	Cecidomyiidae	Family	BOLD:ACG2915	3			GMGMM1098-14	Hymenoptera	Ichneumonidae	Family	BOLD:ACR5571
GMGMA833-14	Lepidoptera	Apamea monoglypha	Apamea	Genus	BOLD:AAB1551	93	Apamea[89], Abromias[3]						GMGRD2649-13	Diptera	Cecidomyiidae	Family	BOLD:ACG2936	3			GMGMM730-14	Hymenoptera	Ichneumonidae	Family	BOLD:ACR5154
GMGRB1023-13	Lepidoptera	Catarhoe cuculata	Catarhoe	Genus	BOLD:AAC2047	38	Catarhoe[37], Epirrhoe[1]						GMGRB1653-13	Diptera	Phoridae	Family	BOLD:ACG2941	19			GMGMM996-14	Coleoptera	Mordellidae	Family	BOLD:ACR5458
GMGRA871-13	Lepidoptera	Catarhoe	Catarhoe	Genus	BOLD:AAC4757	27	Catarhoe[26], Pareulype[1]						GMGRD2551-13	Diptera	Hybotidae	Family	BOLD:ACG2942	14			GMGMM685-14	Hymenoptera	Platygastridae	Family	BOLD:ACR5486
GMGRD2311-13	Lepidoptera	Celypha lacunana	Celypha	Genus	BOLD:AAC3531	136	Celypha[130], Olethreutes[3], Phiaris[2], Syricoris[1]						GMGRD1400-13	Diptera	Cecidomyiidae	Family	BOLD:ACG2968	6			GMGMM577-14	Diptera	Psilidae	Family	BOLD:ACR5616
GMGRD263-13	Lepidoptera	Cosmorhoe ocellata	Cosmorhoe	Genus	BOLD:AAB4250	56	Cosmorhoe[55], Eulithis[1]						GMGRD1428-13	Diptera	Cecidomyiidae	Family	BOLD:ACG2969	5			GMGMM1383-14	Hemiptera	Psyllidae	Family	BOLD:ACR5406
GMGMM667-14	Lepidoptera	Cydia nigricana	Cydia	Genus	BOLD:AAA7614	41	Cydia[35], Dichrorampha[6]						GMGRD015-13	Diptera	Cecidomyiidae	Family	BOLD:ACG3063	19			GMGMM917-14	Hymenoptera	Pteromalidae	Family	BOLD:ACR5278
GMGMK077-14	Lepidoptera	Deltote pygarga	Deltote	Genus	BOLD:AAB9793	42	Deltote[36], Protodeltote[4]						GMGRD854-13	Diptera	Cecidomyiidae	Family	BOLD:ACG3064	2			GMGMM678-14	Diptera	Stratiomyidae	Family	BOLD:ACR4905
GMGMK281-14	Lepidoptera	Dichrorampha	Dichrorampha	Genus	BOLD:AAA8637	79	Dichrorampha[74], Cydia[2], Eucosma[1]						GMGRD1108-13	Diptera	Cecidomyiidae	Family	BOLD:ACG3065	7			GMGMM1352-14	Hemiptera	Tingidae	Family	BOLD:ACR5598
GMGRE335-13	Lepidoptera	Ectoedemia	Ectoedemia	Genus	BOLD:AAB9664	45	Ectoedemia[43], Stigmella[1]						GMGRD522-13	Diptera	Cecidomyiidae	Family	BOLD:ACG3106	16			GMGMM882-14	Hymenoptera	Torymidae	Family	BOLD:ACR4981
GMGMD224-14	Lepidoptera	Elachista utonella	Elachista	Genus	BOLD:AAE0031	28	Elachista[26], Biselachista[2]						GMGRD921-13	Diptera	Cecidomyiidae	Family	BOLD:ACG3107	6			GMGMN462-14	Diptera	Cecidomyiidae	Family	BOLD:ACR7025
GMGMG970-14	Lepidoptera	Ematurga atomaria	Ematurga	Genus	BOLD:AAC1877	55	Ematurga[52], Bupalus[1]						GMGRD485-13	Diptera	Cecidomyiidae	Family	BOLD:ACG3108	2			GMGMN702-14	Diptera	Cecidomyiidae	Family	BOLD:ACR7231
GMGMA618-14	Lepidoptera	Gillmeria ochrodactyla	Gillmeria	Genus	BOLD:AAF5505	18	Gillmeria[16], Platyptilia[2]						GMGRD1417-13	Diptera	Cecidomyiidae	Family	BOLD:ACG3122	3			GMGMN1085-14	Diptera	Cecidomyiidae	Family	BOLD:ACR6278
GMGRG815-13	Lepidoptera	Gonopteryx	Gonopteryx	Genus	BOLD:AAA9222	105	Gonepteryx[97], Gonopteryx[6], Aporia[1]						GMGRD2275-13	Diptera	Cecidomyiidae	Family	BOLD:ACG3123	24			GMGMN1092-14	Diptera	Cecidomyiidae	Family	BOLD:ACR6018
GMGRD058-13	Lepidoptera	Grapholita janthinana	Grapholita	Genus	BOLD:AAE7245	16	Grapholita[14], Pammene[1]						GMGRD2423-13	Diptera	Cecidomyiidae	Family	BOLD:ACG3124	3			GMGMN1067-14	Diptera	Cecidomyiidae	Family	BOLD:ACR5786
GMGRD320-13	Lepidoptera	Hellinsia	Hellinsia	Genus	BOLD:AAE9051	16	Hellinsia[15], Adaina[1]						GMGRE2657-13	Diptera	Cecidomyiidae	Family	BOLD:ACG3200	9			GMGMN722-14	Diptera	Chloropidae	Family	BOLD:ACR6983
GMGRD3117-13	Lepidoptera	Herminia tarsipennalis	Herminia	Genus	BOLD:AAC1538	48	Herminia[48], Zanclognatha[1]						GMGRD2466-13	Diptera	Psychodidae	Family	BOLD:ACG3216	43			GMGMN473-14	Hymenoptera	Eurytomidae	Family	BOLD:ACR7169
GMGRE2409-13	Lepidoptera	Herminia tarsicrinalis	Herminia	Genus	BOLD:AAC1537	29	Herminia[25], Zanclognatha[1]						GMGRD2328-13	Diptera	Cecidomyiidae	Family	BOLD:ACG3218	6			GMGMN913-14	Hymenoptera	Ichneumonidae	Family	BOLD:ACR7369
GMGRD2219-13	Lepidoptera	Lacanobia oleracea	Lacanobia	Genus	BOLD:ABY4614	56	Lacanobia[53], Mamestra[1]						GMGRE241-13	Diptera	Phoridae	Family	BOLD:ACG3263	9			GMGMN1347-14	Hymenoptera	Ichneumonidae	Family	BOLD:ACR5138
GMGMH1061-14	Lepidoptera	Maniola jurtina	Maniola	Genus	BOLD:AAA7785	716	Maniola[699], Erebia[1]						GMGRD1149-13	Diptera	Cecidomyiidae	Family	BOLD:ACG3273	27			GMGMN1407-14	Hymenoptera	Ichneumonidae	Family	BOLD:ACR5570
GMGMH822-14	Lepidoptera	Mniotype satura	Mniotype	Genus	BOLD:AAD0227	33	Mniotype[31], Blepharita[2]						GMGRD466-13	Diptera	Ceratopogonidae	Family	BOLD:ACG3274	2			GMGMN1217-14	Hymenoptera	Ichneumonidae	Family	BOLD:ACR5373
GMGMC1216-14	Lepidoptera	Larentiinae	NO TAXONOMY	Genus	BOLD:AAF1597	9	Epirrhoe[5], Xanthorhoe[3]						GMGRD1657-13	Diptera	Cecidomyiidae	Family	BOLD:ACG3298	7			GMGMN988-14	Hemiptera	Miridae	Family	BOLD:ACR5560
GMGMG161-14	Lepidoptera	Opisthograptis luteolata	Opisthograptis	Genus	BOLD:AAA9865	80	Opisthograptis[79], Opistographa[1]						GMGRD3125-13	Diptera	Cecidomyiidae	Family	BOLD:ACG3335	3			GMGMN507-14	Hymenoptera	Pteromalidae	Family	BOLD:ACR7227
GMGMC1473-14	Lepidoptera	Orthotaenia undulana	Orthotaenia	Genus	BOLD:AAB4021	33	Orthotaenia[32], Celypha[1]						GMGRD3106-13	Diptera	Cecidomyiidae	Family	BOLD:ACG3336	4			GMGMN698-14	Diptera	Sarcophagidae	Family	BOLD:ACR7284
GMGMB1156-14	Lepidoptera	Paraswammerdamia	Paraswammerdamia	Genus	BOLD:AAD6975	39	Paraswammerdamia[37], Swammerdamia[1]						GMGRF1760-13	Diptera	Phoridae	Family	BOLD:ACG3433	3			GMGRA1385-13	Trombidiformes	Bdellidae	Family	BOLD:ACF9695
GMGMN1099-14	Lepidoptera	Pharmacis lupulina	Pharmacis	Genus	BOLD:AAA8451	87	Pharmacis[83], Korscheltellus[3]						GMGRD2631-13	Diptera	Phoridae	Family	BOLD:ACG3434	7			GMGRA429-13	Diptera	Cecidomyiidae	Family	BOLD:ACD9568
GMGRG4852-13	Lepidoptera	Phiaris bipunctana	Phiaris	Genus	BOLD:AAA6005	333	Olethreutes[212], Phiaris[21]						GMGMI978-14	Diptera	Cecidomyiidae	Family	BOLD:ACG3479	3			GMGRA1098-13	Diptera	Cecidomyiidae	Family	BOLD:ACF4706
GMGRD3726-13	Lepidoptera	Phiaris palustrana	Phiaris	Genus	BOLD:AAC8201	28	Phiaris[25], Olethreutes[3]						GMGRC2766-13	Diptera	Cecidomyiidae	Family	BOLD:ACG3480	5			GMGRA1113-13	Diptera	Cecidomyiidae	Family	BOLD:ACF2340
GMGMC1335-14	Lepidoptera	Pieris	Pieris	Genus	BOLD:AAB0552	218	Pieris[217], Pontia[1]						GMGRG3188-13	Diptera	Cecidomyiidae	Family	BOLD:ACG3481	4			GMGRA381-13	Diptera	Cecidomyiidae	Family	BOLD:ACD9508
GMGMJ715-14	Lepidoptera	Polyommatus	Polyommatus	Genus	BOLD:AAA3303	575	Polyommatus[554], Plebejus[2], Lycaeides[2], Turanana[1], Callophrys[1], Aricia[1]						GMGRD1253-13	Diptera	Ceratopogonidae	Family	BOLD:ACG3482	3			GMGRA1121-13	Diptera	Chironomidae	Family	BOLD:ACF2339
GMGMD717-14	Lepidoptera	Rusina ferruginea	Rusina	Genus	BOLD:AAB9497	61	Charanyca[47], Rusina[10], Diarsia[1]						GMGRD482-13	Diptera	Cecidomyiidae	Family	BOLD:ACG3486	2			GMGRA1443-13	Hymenoptera	Cynipidae	Family	BOLD:ACF8872
GMGMF093-14	Lepidoptera	Satyrium pruni	Satyrium	Genus	BOLD:AAC6392	29	Satyrium[27], Fixsenia[1]						GMGRC2609-13	Diptera	Keroplatidae	Family	BOLD:ACG3535	11			GMGRA1275-13	Diptera	Lonchaeidae	Family	BOLD:ACF8050
GMGMF915-14	Lepidoptera	Triodia sylvina	Triodia	Genus	BOLD:AAD0500	72	Triodia[50], Hepialus[1]						GMGRD560-13	Diptera	Cecidomyiidae	Family	BOLD:ACG3539	5			GMGRA1383-13	Mesostigmata	Melicharidae	Family	BOLD:ACF9018
GMGMF621-14	Lepidoptera	Vanessa cardui	Vanessa	Genus	BOLD:AAA5337	240	Vanessa[239], Cynthia[2]						GMGRD677-13	Diptera	Phoridae	Family	BOLD:ACG3544	3			GMGRB781-13	Diptera	Cecidomyiidae	Family	BOLD:ACE2212
GMGRH2089-13	Orthoptera	Gomphocerinae	NO TAXONOMY	Genus	BOLD:AAC5779	130	Chorthippus[77], Gomphocerippus[19], Italohippus[1], Glyptobothrus[1]						GMGRD3331-13	Diptera	Cecidomyiidae	Family	BOLD:ACG3551	8			GMGRB1324-13	Diptera	Cecidomyiidae	Family	BOLD:ACF8765
GMGMF322-14	Orthoptera	Gomphocerinae	NO TAXONOMY	Genus	BOLD:AAL3938	6	Chorthippus[3], Glyptobothrus[1]						GMGRF2729-13	Diptera	Mycetophilidae	Family	BOLD:ACG3566	2			GMGRB1260-13	Diptera	Cecidomyiidae	Family	BOLD:ACF8766
GMGRG3286-13	Diptera	Cecidomyiidae	Diptera	Order	BOLD:ACG0535	24	Diptera[23], Hymenoptera[2]						GMGRG3070-13	Diptera	Cecidomyiidae	Family	BOLD:ACG3581	5			GMGRB811-13	Diptera	Cecidomyiidae	Family	BOLD:ACE2297
GMGRF2782-13	Diptera	Megaselia lucifrons	Diptera	Order	BOLD:AAL9075	1566	Diptera[1572], Coleoptera[1]						GMGRD181-13	Diptera	Phoridae	Family	BOLD:ACG3608	50			GMGRB819-13	Diptera	Cecidomyiidae	Family	BOLD:ACE2296
GMGRE918-13	Diptera	Cecidomyiidae	Diptera	Order	BOLD:ACR0451	2	Hymenoptera[1], Diptera[1]						GMGRD909-13	Diptera	Cecidomyiidae	Family	BOLD:ACG3610	2			GMGRB1169-13	Diptera	Cecidomyiidae	Family	BOLD:ACF9449
GMGMM1010-14	Entomobryomorpha	Isotomidae	Entomobryomorpha	Order	BOLD:ACF7016	20	Entomobryomorpha[17], Symphypleona[3]						GMGRD897-13	Diptera	Cecidomyiidae	Family	BOLD:ACG3613	4			GMGRB951-13	Diptera	Cecidomyiidae	Family	BOLD:ACF7464
GMGRD310-13	Hemiptera	Nasonovia	Hemiptera	Order	BOLD:AAB9332	62	Hemiptera[61], Hymenoptera[1]						GMGRD2282-13	Diptera	Cecidomyiidae	Family	BOLD:ACG3614	21			GMGRB920-13	Diptera	Cecidomyiidae	Family	BOLD:ACF9577
GMGMH1284-14	Hemiptera	Cicadella viridis	Hemiptera	Order	BOLD:ACB8347	16	Hemiptera[13], Orthoptera[3]						GMGRD2276-13	Diptera	Cecidomyiidae	Family	BOLD:ACG3632	3			GMGRB1574-13	Diptera	Cecidomyiidae	Family	BOLD:ACG3842
GMGMC1342-14	Hemiptera	Macrosiphum euphorbiae	Hemiptera	Order	BOLD:AAA6213	940	Hemiptera[947], Hymenoptera[1]						GMGRD2203-13	Diptera	Phoridae	Family	BOLD:ACG3634	2			GMGRB1740-13	Diptera	Cecidomyiidae	Family	BOLD:ACG3841
GMGMH1285-14	Hemiptera	Alebra wahlbergi	Hemiptera	Order	BOLD:ACK8996	11	Hemiptera[10], Hymenoptera[1]						GMGRB1558-13	Diptera	Cecidomyiidae	Family	BOLD:ACG3656	3			GMGRB952-13	Diptera	Ceratopogonidae	Family	BOLD:ACF7463
GMGRE2802-13	Hymenoptera	Plectiscus impurator	Hymenoptera	Order	BOLD:ABU9109	48	Hymenoptera[48], Diptera[2]						GMGRD525-13	Diptera	Cecidomyiidae	Family	BOLD:ACG3660	4			GMGRB191-13	Diptera	Empididae	Family	BOLD:ACF4472
GMGMG200-14	Hymenoptera	Vespa crabro	Hymenoptera	Order	BOLD:ABA8441	45	Hymenoptera[42], Coleoptera[4]						GMGRD2316-13	Diptera	Cecidomyiidae	Family	BOLD:ACG3676	8			GMGRB1444-13	Hymenoptera	Ichneumonidae	Family	BOLD:ACF9114
GMGRB1906-13	Hymenoptera	Apis mellifera	Hymenoptera	Order	BOLD:AAA2326	777	Hymenoptera[772], Coleoptera[3]						GMGRD2292-13	Diptera	Cecidomyiidae	Family	BOLD:ACG3715	29			GMGRB1963-13	Hymenoptera	Ichneumonidae	Family	BOLD:ACG3450
GMGME566-14	Mecoptera	Panorpa germanica	Mecoptera	Order	BOLD:AAZ8610	100	Mecoptera[100], Mantodea[1]						GMGRD3130-13	Diptera	Mycetophilidae	Family	BOLD:ACG3761	5			GMGRB1854-13	Hymenoptera	Platygastridae	Family	BOLD:ACF6027
GMGRD352-13	Neuroptera	Coniopteryx borealis	Neuroptera	Order	BOLD:AAV8088	27	Neuroptera[27], Diptera[1]						GMGRD2304-13	Diptera	Cecidomyiidae	Family	BOLD:ACG3829	2			GMGRC2530-13	Diptera	Cecidomyiidae	Family	BOLD:ACF6111
GMGMK1311-14	Psocoptera	Peripsocus subfasciatus	Psocoptera	Order	BOLD:AAN8450	1193	Psocoptera[1195], Hymenoptera[1]						GMGRD2269-13	Diptera	Cecidomyiidae	Family	BOLD:ACG3831	18			GMGRC2494-13	Diptera	Cecidomyiidae	Family	BOLD:ACF9579
GMGMD708-14	Thysanoptera	Thrips vulgatissimus	Thysanoptera	Order	BOLD:AAG0728	229	Thysanoptera[227], Hymenoptera[2]						GMGRD2253-13	Diptera	Cecidomyiidae	Family	BOLD:ACG3832	3			GMGRC2430-13	Diptera	Cecidomyiidae	Family	BOLD:ACG0533
GMGMH659-14	Araneae	Hypsosinga sanguinea	Hypsosinga sanguinea	Species	BOLD:AAY5095	11	Hypsosinga sanguinea[7], Hypsosinga pygmaea[2]						GMGRD422-13	Diptera	Cecidomyiidae	Family	BOLD:ACG3846	7			GMGRC2346-13	Diptera	Cecidomyiidae	Family	BOLD:ACF7864
GMGRB249-13	Araneae	Enoplognatha	NO TAXONOMY	Species	BOLD:AAA6910	768	Enoplognatha ovata[733], Enoplognatha latimana[6], Enoplognatha nr. ovata[1]						GMGRD408-13	Diptera	Cecidomyiidae	Family	BOLD:ACG3847	4			GMGRC2325-13	Diptera	Cecidomyiidae	Family	BOLD:ACF7866
GMGML1279-14	Araneae	Pardosa	NO TAXONOMY	Species	BOLD:AAE7201	127	Pardosa lugubris[83], Pardosa alacris[18], Pardosa saltans[8], Pardosa koponeni[6], Pardosa caucasica[4], Pardosa lugubris s.l[2], Pardosa cf. lugubris[2]						GMGRD567-13	Diptera	Cecidomyiidae	Family	BOLD:ACG3848	17			GMGRC2390-13	Diptera	Cecidomyiidae	Family	BOLD:ACG0536
GMGMD107-14	Araneae	Salticus cingulatus	Salticus cingulatus	Species	BOLD:AAY8473	15	Salticus cingulatus[14], Salticus scenicus[1]						GMGRD1954-13	Diptera	Pipunculidae	Family	BOLD:ACG3976	3			GMGRC1127-13	Diptera	Cecidomyiidae	Family	BOLD:ACF8065
GMGMI1331-14	Araneae	Theridion varians	Theridion varians	Species	BOLD:AAG1791	52	Theridion varians[52], Theridion sp.[1]						GMGRD1973-13	Diptera	Hybotidae	Family	BOLD:ACG3977	2			GMGRC1367-13	Diptera	Cecidomyiidae	Family	BOLD:ACN2313
GMGMH294-14	Coleoptera	Aleochara albovillosa	Aleochara albovillosa	Species	BOLD:AAZ3036	4	Aleochara albovillosa[2], Aleochara stichai[1], Aleochara sparsa[1]						GMGRD1943-13	Diptera	Phoridae	Family	BOLD:ACG3978	8			GMGRC2553-13	Diptera	Cecidomyiidae	Family	BOLD:ACF9581
GMGRA1855-13	Coleoptera	Anaspis rufilabris	Anaspis rufilabris	Species	BOLD:AAN3436	27	Anaspis rufilabris[23], Anaspis melanostoma[1]						GMGRD383-13	Diptera	Cecidomyiidae	Family	BOLD:ACG4001	9			GMGRC2332-13	Diptera	Ceratopogonidae	Family	BOLD:ACF7867
GMGRB1526-13	Coleoptera	Anthophagus bicornis	Anthophagus bicornis	Species	BOLD:AAO1529	23	Anthophagus bicornis[22], Anthophagus angusticollis[1]						GMGRD3333-13	Diptera	Cecidomyiidae	Family	BOLD:ACG4002	3			GMGRC1957-13	Diptera	Chironomidae	Family	BOLD:ACF9730
GMGMH258-14	Coleoptera	Chrysanthia geniculata	Chrysanthia geniculata	Species	BOLD:AAQ1166	18	Chrysanthia nigricornis[9], Chrysanthia geniculata[6]						GMGMD661-14	Diptera	Cecidomyiidae	Family	BOLD:ACG4004	2			GMGRC2748-13	Mesostigmata	Digamasellidae	Family	BOLD:ACG4353
GMGRD3605-13	Coleoptera	Chrysobothris affinis	Chrysobothris affinis	Species	BOLD:AAO3348	12	Chrysobothris affinis[11], Chrysobothris affinis (F.)[1]						GMGRD2295-13	Diptera	Cecidomyiidae	Family	BOLD:ACG4023	15			GMGRC1661-13	Diptera	Empididae	Family	BOLD:ACF9777
GMGME253-14	Coleoptera	Curtimorda maculosa	Curtimorda maculosa	Species	BOLD:ACF8147	4	Curtimorda maculosa[2], Curtimorda bisignata[1]						GMGRD1296-13	Diptera	Ceratopogonidae	Family	BOLD:ACG4026	5			GMGMH798-14	Diptera	Agromyzinae	Subfamily	BOLD:ACR2177
GMGMI1587-14	Coleoptera	Lordithon thoracicus	Lordithon thoracicus	Species	BOLD:ABA9749	57	Lordithon thoracicus[58], Lordithon nr. appalachianus[1]						GMGRD2250-13	Diptera	Cecidomyiidae	Family	BOLD:ACG4028	22			GMGMH1185-14	Hymenoptera	Alysiinae	Subfamily	BOLD:ACR1118
GMGMJ692-14	Coleoptera	Lordithon trinotatus	Lordithon trinotatus	Species	BOLD:ABW5002	3	Lordithon bimaculatus[2], Lordithon trinotatus[1]						GMGRD3260-13	Diptera	Cecidomyiidae	Family	BOLD:ACG4106	7			GMGMH831-14	Diptera	Lonchaeinae	Subfamily	BOLD:ACR2129
GMGMA308-14	Coleoptera	Microscydmus minimus	Microscydmus minimus	Species	BOLD:ACC4328	16	Microscydmus minimus[15], Microscydmus nanus[1]						GMGRD1626-13	Diptera	Mycetophilidae	Family	BOLD:ACG4137	38			GMGMH1600-14	Diptera	Tipulinae	Subfamily	BOLD:ACR4602
GMGMF854-14	Coleoptera	Gyrophaena	NO TAXONOMY	Species	BOLD:AAO0294	10	Gyrophaena angustata[6], Gyrophaena manca[3]						GMGRD2738-13	Diptera	Cecidomyiidae	Family	BOLD:ACG4166	11			GMGMI608-14	Hymenoptera	Belytinae	Subfamily	BOLD:ACR3305
GMGRA1742-13	Coleoptera	Anaspis	NO TAXONOMY	Species	BOLD:AAN9301	10	Anaspis septentrionalis[6], Anaspis marginicollis[1]						GMGRD391-13	Diptera	Chironomidae	Family	BOLD:ACG4167	5			GMGMI1415-14	Hymenoptera	Campopleginae	Subfamily	BOLD:ACR2163
GMGMJ731-14	Coleoptera	Propylaea	NO TAXONOMY	Species	BOLD:AAF6935	120	Propylaea quatuordecimpunctata[75], Propylaea japonica[6]						GMGRB1611-13	Diptera	Scatopsidae	Family	BOLD:ACG4181	6			GMGMI654-14	Hymenoptera	Campopleginae	Subfamily	BOLD:ACR2404
GMGMM248-14	Coleoptera	Leiodes	NO TAXONOMY	Species	BOLD:AAO1258	16	Leiodes polita[6], Leiodes calcarata[1]						GMGRE1499-13	Diptera	Dolichopodidae	Family	BOLD:ACG4182	36			GMGMI581-14	Hymenoptera	Orthocentrinae	Subfamily	BOLD:ACR3365
GMGMH527-14	Coleoptera	Scymnus	NO TAXONOMY	Species	BOLD:AAO4399	9	Scymnus mimulus[4], Scymnus schmidti[1]						GMGRD343-13	Diptera	Ceratopogonidae	Family	BOLD:ACG4202	10			GMGMI1184-14	Diptera	Oscinellinae	Subfamily	BOLD:ACR3573
GMGRB1478-13	Coleoptera	Oedemera	NO TAXONOMY	Species	BOLD:AAO0912	18	Oedemera nobilis[13], Oedemera sp. EL-2009[1]						GMGRD3262-13	Diptera	Ceratopogonidae	Family	BOLD:ACG4212	3			GMGMJ1405-14	Hymenoptera	Brachistinae	Subfamily	BOLD:ACR4344
GMGRD1280-13	Coleoptera	Agrypnus	NO TAXONOMY	Species	BOLD:AAM0540	27	Agrypnus murina[17], Agrypnus murinus[7]						GMGML730-14	Diptera	Cecidomyiidae	Family	BOLD:ACG4213	2			GMGMJ819-14	Hemiptera	Drepanosiphinae	Subfamily	BOLD:ACR2126
GMGRC834-13	Coleoptera	Altica	NO TAXONOMY	Species	BOLD:AAQ1303	54	Altica oleracea[29], Altica lythri[3], Altica opacifrons[3], Altica pusilla[1]						GMGRD1423-13	Diptera	Cecidomyiidae	Family	BOLD:ACG4250	6			GMGMK1325-14	Diptera	Cecidomyiinae	Subfamily	BOLD:ACR2740
GMGMH276-14	Coleoptera	Magdalis	NO TAXONOMY	Species	BOLD:AAO0722	16	Magdalis armigera[5], Magdalis armiger[3]						GMGRD1120-13	Diptera	Cecidomyiidae	Family	BOLD:ACG4251	4			GMGMK833-14	Hymenoptera	Ctenopelmatinae	Subfamily	BOLD:ACR3873
GMGMB719-14	Coleoptera	Mordella	NO TAXONOMY	Species	BOLD:AAO3098	15	Mordella huetheri[11], Mordella aculeata[3]						GMGRC2608-13	Diptera	Dolichopodidae	Family	BOLD:ACG4261	3			GMGMK1473-14	Hymenoptera	Doryctinae	Subfamily	BOLD:ACR4273
GMGMI1106-14	Coleoptera	Mordella	NO TAXONOMY	Species	BOLD:ACG2749	28	Mordella holomelaena[11], Mordella brachyura[7], Mordella sp. g48[1]						GMGRD359-13	Diptera	Sciaridae	Family	BOLD:ACG4281	2			GMGMK1483-14	Hymenoptera	Entedoninae	Subfamily	BOLD:ACU8534
GMGMD733-14	Coleoptera	Omalisus	NO TAXONOMY	Species	BOLD:AAO3226	15	Omalisus fontisbellaquaei[13], Omalisus fontisbellaquei[1]						GMGRD453-13	Diptera	Cecidomyiidae	Family	BOLD:ACG4282	9			GMGML1574-14	Hemiptera	Calaphidinae	Subfamily	BOLD:ACR5436
GMGRF3236-13	Coleoptera	Charopus	NO TAXONOMY	Species	BOLD:ACG2737	14	Charopus flavipes[9], Charopus graminicola[4]						GMGRD461-13	Diptera	Cecidomyiidae	Family	BOLD:ACG4283	2			GMGML1357-14	Diptera	Cecidomyiinae	Subfamily	BOLD:ACR5617
GMGMH720-14	Coleoptera	Oulema	NO TAXONOMY	Species	BOLD:AAO0694	37	Oulema duftschmidi[8], Oulema melanopus[4], Oulema cfr. melanopus[2]						GMGRD749-13	Diptera	Phoridae	Family	BOLD:ACG4325	15			GMGML1599-14	Hemiptera	Typhlocybinae	Subfamily	BOLD:ACR5249
GMGRC2597-13	Coleoptera	Philonthus	NO TAXONOMY	Species	BOLD:AAN6145	20	Philonthus varians[16], Philonthus pseudovarians[1]						GMGRD2490-13	Diptera	Cecidomyiidae	Family	BOLD:ACG4375	2			GMGMM1422-14	Hemiptera	Aphidinae	Subfamily	BOLD:ACR5094
GMGMM598-14	Coleoptera	Oulema	NO TAXONOMY	Species	BOLD:AAN1559	18	Oulema gallaeciana[11], Oulema obscura[5]						GMGRD645-13	Diptera	Cecidomyiidae	Family	BOLD:ACG4456	7			GMGMM726-14	Hymenoptera	Microgastrinae	Subfamily	BOLD:ACR5179
GMGMJ686-14	Coleoptera	Polydrusus undatus	Polydrusus undatus	Species	BOLD:AAO1424	18	Polydrusus undatus[11], Polydrusus tereticollis[4]						GMGRD660-13	Diptera	Cecidomyiidae	Family	BOLD:ACG4458	3			GMGMN1210-14	Hymenoptera	Cheloninae	Subfamily	BOLD:ACR5476
GMGMF1367-14	Dermaptera	Forficula auricularia	Forficula auricularia	Species	BOLD:AAG9897	438	Forficula auricularia-A[397], Forficula auricularia[35]						GMGRD663-13	Diptera	Cecidomyiidae	Family	BOLD:ACG4459	7			GMGMN493-14	Hymenoptera	Eurytominae	Subfamily	BOLD:ACU3946
GMGMN656-14	Diptera	Agria affinis	Agria affinis	Species	BOLD:AAC5699	154	Agria affinis[146], Agria housei[2]						GMGRD497-13	Diptera	Cecidomyiidae	Family	BOLD:ACG4462	6			GMGMN623-14	Hymenoptera	Ichneumoninae	Subfamily	BOLD:ACR7130
GMGMD215-14	Diptera	Allodia ornaticollis	Allodia ornaticollis	Species	BOLD:ABA7174	21	Allodia ornaticollis[7], Allodia zaitzevi[3]						GMGRD421-13	Diptera	Cecidomyiidae	Family	BOLD:ACG4546	4			GMGRA1307-13	Diptera	Orthocladiinae	Subfamily	BOLD:ACF6302
GMGMI106-14	Diptera	Anthepiscopus indet.	Anthepiscopus indet.	Species	BOLD:ACD9492	8	Anthepiscopus indet.[7], Anthepiscopus sp. 1[1]						GMGRD753-13	Diptera	Cecidomyiidae	Family	BOLD:ACG4584	2			GMGRB1385-13	Hymenoptera	Eulophinae	Subfamily	BOLD:ACF9112
GMGMH293-14	Diptera	Anthomyza paraneglecta	Anthomyza paraneglecta	Species	BOLD:ABX1735	18	Anthomyza paraneglecta[3], Anthomyza pallida[3]						GMGRD204-13	Diptera	Phoridae	Family	BOLD:ACG4585	15			GMGMH883-14	Hymenoptera	Diplolepis	Genus	BOLD:ACR3405
GMGML1252-14	Diptera	Asteia beata	Asteia beata	Species	BOLD:AAN5417	38	Asteia beata[16], Asteia amoena[4]						GMGRD785-13	Diptera	Phoridae	Family	BOLD:ACG4586	25			GMGMH725-14	Diptera	Rhopalomyia	Genus	BOLD:ACR2334
GMGMD214-14	Diptera	Azelia triquetra	Azelia triquetra	Species	BOLD:ABV5066	9	Azelia triquetra[8], Azelia zetterstedtii[1]						GMGRD2456-13	Diptera	Cecidomyiidae	Family	BOLD:ACG4620	2			GMGMI755-14	Diptera	Aulagromyza	Genus	BOLD:ACR3349
GMGRA1210-13	Diptera	Boletina gripha	Boletina gripha	Species	BOLD:AAF6783	8	Boletina gripha[5], Boletina groenlandica[1]						GMGRD1293-13	Diptera	Cecidomyiidae	Family	BOLD:ACG4634	12			GMGMI1128-14	Diptera	Fannia	Genus	BOLD:ACR3769
GMGMA1365-14	Diptera	Boletina silvatica	Boletina silvatica	Species	BOLD:AAI8805	19	Boletina silvatica[8], Boletina lundstroemi[4], Boletina edwardsi[1], Boletina dissipata[1]						GMGRD2594-13	Diptera	Cecidomyiidae	Family	BOLD:ACG4665	3			GMGMI1359-14	Hymenoptera	Microgaster	Genus	BOLD:ACR3021
GMGMA1270-14	Diptera	Bolitophila austriaca	Bolitophila austriaca	Species	BOLD:AAG4863	12	Bolitophila austriaca[7], Bolitophila cinerea[3]						GMGRD2739-13	Diptera	Cecidomyiidae	Family	BOLD:ACG4668	3			GMGMI528-14	Diptera	Synorthocladius	Genus	BOLD:ACR6475
GMGMA887-14	Diptera	Bolitophila hybrida	Bolitophila hybrida	Species	BOLD:ABW6580	9	Bolitophila hybrida[5], Bolitophila rossica[1]						GMGRD061-13	Diptera	Phoridae	Family	BOLD:ACG4669	5			GMGMJ956-14	Hymenoptera	Euryproctus	Genus	BOLD:ACR3041
GMGMC1112-14	Diptera	Bradysia forficulata	Bradysia forficulata	Species	BOLD:ACP2345	14	Bradysia nocturna[5], Bradysia forficulata[2]						GMGRE825-13	Diptera	Cecidomyiidae	Family	BOLD:ACG5291	10			GMGMJ1291-14	Hymenoptera	Microgaster	Genus	BOLD:ACR4142
GMGRC2387-13	Diptera	Brevicornu fuscipenne	Brevicornu fuscipenne	Species	BOLD:AAM8957	46	Brevicornu fuscipenne[28], Brevicornu sp. CJB10[1]						GMGRG4778-13	Diptera	Cecidomyiidae	Family	BOLD:ACG5292	3			GMGMJ506-14	Hemiptera	Orius	Genus	BOLD:ACR5098
GMGMI1317-14	Diptera	Campsicnemus curvipes	Campsicnemus curvipes	Species	BOLD:ACD1411	7	Campsicnemus curvipes[6], Campsicnemus scambus[1]						GMGRF2333-13	Diptera	Phoridae	Family	BOLD:ACG5293	23			GMGMJ1036-14	Diptera	Phytomyza	Genus	BOLD:ACR3022
GMGMI1197-14	Diptera	Carcelia rasa	Carcelia rasa	Species	BOLD:ACG2953	6	Carcelia rasa[4], Carcelia puberula[2]						GMGMD1581-14	Diptera	Ceratopogonidae	Family	BOLD:ACG5310	26			GMGMK907-14	Lepidoptera	Acleris	Genus	BOLD:ACR2133
GMGRD1976-13	Diptera	Cephalops pallidivittipes	Cephalops pallidivittipes	Species	BOLD:AAG1658	66	Cephalops pallidivittipes[15], Cephalops furnaceus[5], Cephalops vittipes[4]						GMGRE868-13	Diptera	Cecidomyiidae	Family	BOLD:ACG5311	5			GMGMK1022-14	Coleoptera	Eutrichapion	Genus	BOLD:ACR3330
GMGML1248-14	Diptera	Choerades marginata	Choerades marginata	Species	BOLD:ABW4631	14	Choerades marginata[7], Choerades marginatus[6]						GMGRE545-13	Diptera	Phoridae	Family	BOLD:ACG5317	2			GMGMK1463-14	Hymenoptera	Microgaster	Genus	BOLD:ACR4062
GMGMF039-14	Diptera	Choerades marginata	Choerades marginata	Species	BOLD:ACJ5041	6	Choerades marginatus[4], Choerades marginata[2]						GMGRE646-13	Diptera	Cecidomyiidae	Family	BOLD:ACG5369	5			GMGMK483-14	Hymenoptera	Monoblastus	Genus	BOLD:ACR4591
GMGMK1303-14	Diptera	Clusia flava	Clusia flava	Species	BOLD:ACB6713	10	Clusia flava[8], Clusia flava Meigen 1830[1]						GMGRE662-13	Diptera	Cecidomyiidae	Family	BOLD:ACG5370	4			GMGMK484-14	Hymenoptera	Phobetes	Genus	BOLD:ACR3862
GMGRG224-13	Diptera	Clusiodes albimanus	Clusiodes albimanus	Species	BOLD:ACB6702	10	Clusiodes albimanus[7], Clusiodes ruficollis[1]						GMGRE809-13	Diptera	Cecidomyiidae	Family	BOLD:ACG5399	5			GMGML1445-14	Hymenoptera	Alexeter	Genus	BOLD:ACR4573
GMGMK069-14	Diptera	Clusiodes verticalis	Clusiodes verticalis	Species	BOLD:AAR9385	3	Clusiodes verticalis[2], Clusiodes ruficollis[1]						GMGRE2536-13	Diptera	Cecidomyiidae	Family	BOLD:ACG5420	7			GMGML188-14	Hymenoptera	Ichneumon	Genus	BOLD:ACR4326
GMGMC838-14	Diptera	Coenosia pumila	Coenosia pumila	Species	BOLD:ABW0085	20	Coenosia pumila[12], Coenosia perpusilla[2], Coenosia paludis[2]						GMGRE1862-13	Diptera	Cecidomyiidae	Family	BOLD:ACG5437	12			GMGML1473-14	Hymenoptera	Polyaulon	Genus	BOLD:ACR5335
GMGMD099-14	Diptera	Coenosia pygmaea	Coenosia pygmaea	Species	BOLD:AAC8884	104	Coenosia verralli[77], Coenosia pygmaea[3]						GMGRE820-13	Diptera	Cecidomyiidae	Family	BOLD:ACG5475	5			GMGML099-14	Diptera	Protocalliphora	Genus	BOLD:ACR3804
GMGMG610-14	Diptera	Cordyla pusilla	Cordyla pusilla	Species	BOLD:AAY7668	40	Cordyla pusilla[2], Cordyla brevicornis[1]						GMGRE1540-13	Diptera	Phoridae	Family	BOLD:ACG5497	4			GMGML575-14	Diptera	Sciara	Genus	BOLD:ACR4627
GMGMF1112-14	Diptera	Cricotopus sylvestris	Cricotopus sylvestris	Species	BOLD:ABW0207	63	Cricotopus sylvestris[50], Cricotopus trifasciatus[6], Cricotopus tricinctus[3], Cricotopus sp.[1]						GMGMA064-14	Diptera	Cecidomyiidae	Family	BOLD:ACG5554	5			GMGML941-14	Hymenoptera	Tycherus	Genus	BOLD:ACR3811
GMGMM337-14	Diptera	Ctenosciara hyalipennis	Ctenosciara hyalipennis	Species	BOLD:AAH3983	4061	Ctenosciara hyalipennis[3398], Ctenosciara exigua[2]						GMGRE1147-13	Diptera	Cecidomyiidae	Family	BOLD:ACG5730	5			GMGML075-14	Diptera	Villa	Genus	BOLD:ACR3748
GMGRF5309-13	Diptera	Dasysyrphus lenensis	Dasysyrphus lenensis	Species	BOLD:AAB2865	191	Dasysyrphus pauxillus[46], Dasysyrphus pacificus[23], Dasysyrphus laticaudus[23], Dasysyrphus creper[22], Dasysyrphus amalopis[14], Dasysyrphus pinastri[13], Dasysyrphus occidualis[13], Dasysyrphus nigricornis[7], Dasysyrphus lenensis[5], Dasysyrphus Sp. 23[1]						GMGMA945-14	Diptera	Cecidomyiidae	Family	BOLD:ACG5741	17			GMGMM916-14	Hymenoptera	Glypta	Genus	BOLD:ACR5542
GMGMM1360-14	Diptera	Delia florilega	Delia florilega	Species	BOLD:ACR4394	216	Delia florilega[199], Delia sp.[1], Delia platura[1]						GMGRE466-13	Diptera	Phoridae	Family	BOLD:ACG6158	2			GMGMM1543-14	Diptera	Lonchaea	Genus	BOLD:ACR3821
GMGMC560-14	Diptera	Diastata ornata	Diastata ornata	Species	BOLD:ACV3659	4	Diastata ornata[1], Diastata nebulosa[1]						GMGRE1878-13	Diptera	Cecidomyiidae	Family	BOLD:ACG6177	3			GMGMM1220-14	Diptera	Ophiomyia	Genus	BOLD:ACR4808
GMGMM1424-14	Diptera	Dicranomyia caledonica	Dicranomyia caledonica	Species	BOLD:ABV3908	25	Dicranomyia caledonica[6], Dicranomyia stylifera[2]						GMGRE472-13	Diptera	Cecidomyiidae	Family	BOLD:ACG6268	3			GMGMM927-14	Hymenoptera	Phygadeuon	Genus	BOLD:ACR5488
GMGMM1399-14	Diptera	Dolichopus discifer	Dolichopus discifer	Species	BOLD:AAG9628	371	Dolichopus discifer[83], Dolichopus nigricornis[1]						GMGRE457-13	Diptera	Psychodidae	Family	BOLD:ACG6331	5			GMGMN963-14	Hemiptera	Hyadaphis	Genus	BOLD:ACR5109
GMGML1101-14	Diptera	Drosophila transversa	Drosophila transversa	Species	BOLD:ACB9860	16	Drosophila transversa[8], Drosophila phalerata[1]						GMGMC1074-14	Diptera	Cecidomyiidae	Family	BOLD:ACG6560	39			GMGRA069-13	Diptera	Hartigiola	Genus	BOLD:ACE0527
GMGRF5285-13	Diptera	Drosophila unispina	Drosophila unispina	Species	BOLD:ABX1718	22	Drosophila phalerata[4], Drosophila unispina[1], Drosophila histrio[1]						GMGRE100-13	Diptera	Cecidomyiidae	Family	BOLD:ACG6626	2			GMGRA1459-13	Hymenoptera	Microctonus	Genus	BOLD:ACF6006
GMGMI825-14	Diptera	Dynatosoma nigromaculatum	Dynatosoma nigromaculatum	Species	BOLD:ABA1524	5	Dynatosoma nigromaculatum[2], Dynatosoma sp. GS16[1], Dynatosoma dihaeta[1]						GMGRD2798-13	Diptera	Keroplatidae	Family	BOLD:ACG6658	2			GMGRA088-13	Diptera	Micropsectra	Genus	BOLD:ACE0523
GMGML1167-14	Diptera	Elachiptera decipiens	Elachiptera decipiens	Species	BOLD:AAH4164	191	Elachiptera decipiens[119], Elachiptera cornuta[1], Elachiptera californica[1]						GMGRD2789-13	Diptera	Mycetophilidae	Family	BOLD:ACG6740	9			GMGRA1803-13	Diptera	Phorbia	Genus	BOLD:ACF6716
GMGMN942-14	Diptera	Empis tessellata	Empis tessellata	Species	BOLD:ABU6648	12	Empis tessellata[11], Empis nigricans[1]						GMGRE1192-13	Diptera	Cecidomyiidae	Family	BOLD:ACG6806	2			GMGRA366-13	Diptera	Thaumatomyia	Genus	BOLD:ACD9575
GMGMB404-14	Diptera	Epidapus atomarius	Epidapus atomarius	Species	BOLD:ACD4767	133	Epidapus atomarius[140], Epidapus sp. SS-2012[1]						GMGRE1209-13	Diptera	Cecidomyiidae	Family	BOLD:ACG6870	34			GMGRA1688-13	Hymenoptera	Tranosema	Genus	BOLD:ACG3665
GMGMJ444-14	Diptera	Exechia dizona	Exechia dizona	Species	BOLD:ABA3392	8	Exechia dizona[5], Exechia cf. dizona[1]						GMGRD3281-13	Diptera	Phoridae	Family	BOLD:ACG6973	8			GMGRB067-13	Diptera	Paraphaenocladius	Genus	BOLD:ACF8295
GMGRI015-13	Diptera	Exechia dorsalis	Exechia dorsalis	Species	BOLD:ABA7748	12	Exechia dorsalis[10], Exechia sp.[1]						GMGRE1252-13	Diptera	Phoridae	Family	BOLD:ACG6991	15			GMGRB1509-13	Diptera	Phaonia	Genus	BOLD:ACG4510
GMGMM373-14	Diptera	Exechia higroscutellata	Exechia higroscutellata	Species	BOLD:ACB1546	8	Exechia nigroscutellata[3], Exechia higroscutellata[2]						GMGRD3312-13	Diptera	Cecidomyiidae	Family	BOLD:ACG7007	6			GMGRB1688-13	Diptera	Scatopsciara	Genus	BOLD:ACG3844
GMGME544-14	Diptera	Fannia aequilineata	Fannia aequilineata	Species	BOLD:AAG1746	4	Fannia aequilineata[2], Fannia latipalpis[1]						GMGRE103-13	Diptera	Phoridae	Family	BOLD:ACG7013	11			GMGRB532-13	Diptera	Xylosciara	Genus	BOLD:ACF7432
GMGRH1907-13	Diptera	Gymnometriocnemus kamimegavirgus	Gymnometriocnemus kamimegavirgus	Species	BOLD:AAE3567	456	Gymnometriocnemus kamimegavirgus[306], Gymnometriocnemus volitans[61]						GMGRE2330-13	Diptera	Cecidomyiidae	Family	BOLD:ACG7065	16			GMGRC618-13	Diptera	Camptomyia	Genus	BOLD:ACG3993
GMGMN1008-14	Diptera	Haematopota pluvialis	Haematopota pluvialis	Species	BOLD:AAI6521	37	Haematopota pluvialis[28], Haematopota subcylindrica[3]						GMGRD3269-13	Diptera	Cecidomyiidae	Family	BOLD:ACG7075	2			GMGRC955-13	Hymenoptera	Dinotrema	Genus	BOLD:ACG3770
GMGMJ540-14	Diptera	Heleomyza serrata	Heleomyza serrata	Species	BOLD:ABX8716	71	Heleomyza serrata[23], Heleomyza sp. nov.[1]						GMGRE054-13	Diptera	Cecidomyiidae	Family	BOLD:ACG7117	3			GMGRC950-13	Hymenoptera	Dinotrema	Genus	BOLD:ACG5783
GMGME1598-14	Diptera	Helina pubiseta	Helina pubiseta	Species	BOLD:ACC4838	12	Helina pubiseta[11], Helina depuncta[1]						GMGRD3293-13	Diptera	Scatopsidae	Family	BOLD:ACG7169	2			GMGMI1401-14	Hymenoptera	Erromenus punctatus	Species	BOLD:ACR2494
GMGML1596-14	Diptera	Helophilus pendulus	Helophilus pendulus	Species	BOLD:AAI6747	26	Helophilus pendulus[28], Helophilus hybridus[1]						GMGRD3256-13	Diptera	Cecidomyiidae	Family	BOLD:ACG7283	2			GMGMJ1075-14	Diptera	Crumomyia nitida	Species	BOLD:ACR3363
GMGRF5436-13	Diptera	Heterostylodes obscurus	Heterostylodes obscurus	Species	BOLD:ACB6446	4	Heterostylodes pratensis[2], Heterostylodes obscurus[2]						GMGRF3668-13	Diptera	Cecidomyiidae	Family	BOLD:ACG7404	5			GMGMJ564-14	Hemiptera	Nasonovia ribisnigri	Species	BOLD:ACR5425
GMGRE2489-13	Diptera	Hilara nitidula	Hilara nitidula	Species	BOLD:ACD3049	6	Hilara nitidula[3], Hilara hybrida[3]						GMGRF3611-13	Diptera	Cecidomyiidae	Family	BOLD:ACG7415	7			GMGMM1513-14	Neuroptera	Wesmaelius subnebulosus	Species	BOLD:ACR4277
GMGRH2113-13	Diptera	Hybos culiciformis	Hybos culiciformis	Species	BOLD:ACD8518	28	Hybos culiciformis[25], Hybos grossipes[1], Hybos femoratus[1]						GMGRE971-13	Diptera	Phoridae	Family	BOLD:ACG7416	10			GMGRA179-13	Diptera	Leptosciarella helvetica	Species	BOLD:ACE0516
GMGMA420-14	Diptera	Leptopeza nr. borealis	Leptopeza nr. borealis	Species	BOLD:ACB3430	75	Leptopeza nr. borealis[73], Leptopeza borealis[3]						GMGRF6087-13	Diptera	Cecidomyiidae	Family	BOLD:ACG7417	3			GMGRA1602-13	Diptera	Parakiefferiella sp. 1SW	Species	BOLD:ACE6037
GMGMK170-14	Diptera	Leptosciarella scutellata	Leptosciarella scutellata	Species	BOLD:ACD6061	11	Leptosciarella scutellata[4], Leptosciarella rejecta[1]						GMGRE1027-13	Diptera	Cecidomyiidae	Family	BOLD:ACG7418	12			GMGRB137-13	Diptera	Trichosia edwardsi	Species	BOLD:ACF4471
GMGMI586-14	Diptera	Liriomyza bryoniae	Liriomyza bryoniae	Species	BOLD:ACD2707	10	Liriomyza bryoniae[5], Liriomyza trifolii[4]						GMGRE370-13	Diptera	Phoridae	Family	BOLD:ACG7419	3			GMGRC1329-13	Diptera	Epidapus microthorax	Species	BOLD:ACF7676
GMGRD3427-13	Diptera	Lonchoptera flava	Lonchoptera flava	Species	BOLD:ACB6694	12	Lonchoptera nitidifrons[5], Lonchoptera flava[5], Lonchoptera fallax[2]						GMGRE314-13	Diptera	Phoridae	Family	BOLD:ACG7431	4			GMGRF5515-13	0	Arachnida	Class	BOLD:ACN9661
GMGMN1253-14	Diptera	Megaselia diversa	Megaselia diversa	Species	BOLD:AAG3235	1435	Megaselia sepulchralis[1], Megaselia diversa[1]						GMGRF5762-13	Diptera	Mycetophilidae	Family	BOLD:ACG7432	4			GMGRD1817-13	Sarcoptiformes	Sarcoptiformes	Order	BOLD:ACG5271
GMGMD195-14	Diptera	Megaselia flavicans	Megaselia flavicans	Species	BOLD:ACB9822	28	Megaselia flavicans[2], Megaselia pulicaria-komplex[1]						GMGMB1125-14	Diptera	Cecidomyiidae	Family	BOLD:ACG7620	30			GMGRD1848-13	Sarcoptiformes	Sarcoptiformes	Order	BOLD:ACG5273
GMGMC1026-14	Diptera	Megaselia pulicaria-komplex	Megaselia pulicaria-komplex	Species	BOLD:AAP4698	85	Megaselia pulicaria-komplex[2], Megaselia angusta[1]						GMGRE1271-13	Diptera	Cecidomyiidae	Family	BOLD:ACG7778	4			GMGRD1853-13	Trombidiformes	Trombidiformes	Order	BOLD:ACG5272
GMGMN1321-14	Diptera	Megaselia sp. BOLDAAG3237	Megaselia sp. BOLDAAG3237	Species	BOLD:AAG3237	297	Megaselia sp. BOLDAAG3237[4], Megaselia lata[1], Megaselia consetigera[1]						GMGRE275-13	Diptera	Milichiidae	Family	BOLD:ACG7932	4			GMGRE2976-13	Hemiptera	Hemiptera	Order	BOLD:ACI4904
GMGMB1180-14	Diptera	Megaselia sp. BOLDAAG3259	Megaselia sp. BOLDAAG3259	Species	BOLD:AAG3259	1343	Megaselia sp. BOLDAAG3259[2], Megaselia largifrontalis[1], Megaselia altifrons[1]						GMGRG2118-13	Diptera	Cecidomyiidae	Family	BOLD:ACG8008	2			GMGRF1946-13	Hymenoptera	Hymenoptera	Order	BOLD:ACI9018
GMGRF5647-13	Diptera	Megaselia sp. BOLDAAG3260	Megaselia sp. BOLDAAG3260	Species	BOLD:AAG3260	369	Megaselia sp. BOLDAAG3260[28], Megaselia lucifrons[1], Megaselia giraudii[1]						GMGRE1711-13	Diptera	Cecidomyiidae	Family	BOLD:ACG8109	2			GMGRF608-13	Hymenoptera	Hymenoptera	Order	BOLD:ACI9090
GMGMN1245-14	Diptera	Metalimnobia quadrinotata	Metalimnobia quadrinotata	Species	BOLD:ACF2132	38	Metalimnobia quadrinotata[15], Metalimnobia tenua[13], Metalimnobia quadrimaculata[4], Metalimnobia bifasciata[2], Metalimnobia sp.[1]						GMGRE1703-13	Diptera	Cecidomyiidae	Family	BOLD:ACG8110	3			GMGRF5639-13	Hymenoptera	Hymenoptera	Order	BOLD:ACJ1166
GMGME214-14	Diptera	Metalimnobia zetterstedti	Metalimnobia zetterstedti	Species	BOLD:ABA7397	27	Metalimnobia zetterstedti[17], Metalimnobia quadrimaculata[7], Metalimnobia quadrinotata[2]						GMGRE2155-13	Diptera	Cecidomyiidae	Family	BOLD:ACG8116	3			GMGRF4514-13	Hymenoptera	Hymenoptera	Order	BOLD:ACI9176
GMGRF4317-13	Diptera	Muscina levida	Muscina levida	Species	BOLD:AAB8817	307	Muscina levida[304], Muscina prolapsa[1]						GMGRE2587-13	Diptera	Cecidomyiidae	Family	BOLD:ACG8117	4			GMGRF6272-13	Hymenoptera	Hymenoptera	Order	BOLD:ACJ1040
GMGMJ596-14	Diptera	Mycetophila bohemica	Mycetophila bohemica	Species	BOLD:ABW6637	11	Mycetophila bohemica[10], Mycetophila gibbula[1]						GMGRE1298-13	Diptera	Cecidomyiidae	Family	BOLD:ACG8127	2			GMGRG3935-13	Sarcoptiformes	Sarcoptiformes	Order	BOLD:ACJ4883
GMGMC1405-14	Diptera	Mycomya annulata	Mycomya annulata	Species	BOLD:AAH3510	165	Mycomya annulata[176], Mycomya cf. annulata[2]						GMGRE1871-13	Diptera	Phoridae	Family	BOLD:ACG8228	27			GMGRH1995-13	Symphypleona	Symphypleona	Order	BOLD:ACJ5488
GMGMB1401-14	Diptera	Mycomya dziedziki	Mycomya dziedziki	Species	BOLD:ACG7131	3	Mycomya dziedziki[2], Mycomya dziedzickii[1]						GMGRE1408-13	Diptera	Phoridae	Family	BOLD:ACG8242	7			GMGRC447-13	Diptera	Hybotidae	Family	BOLD:ACG3991
GMGMI621-14	Diptera	Mydaea electa	Mydaea electa	Species	BOLD:AAE0077	76	Mydaea pseudonubila[50], Mydaea electa[4]						GMGRE1044-13	Diptera	Cecidomyiidae	Family	BOLD:ACG8249	5			GMGRC2882-13	Hymenoptera	Ichneumonidae	Family	BOLD:ACG5110
GMGMN1221-14	Diptera	Mydaea humeralis	Mydaea humeralis	Species	BOLD:AAE0058	90	Mydaea occidentalis[66], Mydaea humeralis[14]						GMGRE2676-13	Diptera	Cecidomyiidae	Family	BOLD:ACG8358	2			GMGRC2894-13	Hymenoptera	Ichneumonidae	Family	BOLD:ACG4849
GMGML1446-14	Diptera	Mydaea humeralis	Mydaea humeralis	Species	BOLD:ACD1934	5	Mydaea humeralis[3], Mydaea setifemur[2]						GMGRC2771-13	Diptera	Phoridae	Family	BOLD:ACH1922	120			GMGRC868-13	Hymenoptera	Ichneumonidae	Family	BOLD:ACG3148
GMGRB1423-13	Diptera	Mydaea nebulosa	Mydaea nebulosa	Species	BOLD:ACB9959	51	Mydaea urbana[28], Mydaea nebulosa[14], Mydaea nr. nebulosa[1]						GMGRF172-13	Diptera	Cecidomyiidae	Family	BOLD:ACH2823	48			GMGRC1300-13	Hymenoptera	Ichneumonidae	Family	BOLD:ACF6282
GMGMC990-14	Diptera	Neoascia metallica	Neoascia metallica	Species	BOLD:ACE9059	36	Neoascia metallica[18], Neoascia tenur[17], Neoascia geniculata[1]						GMGRB1045-13	Diptera	Phoridae	Family	BOLD:ACH2960	27			GMGRC299-13	Hymenoptera	Megaspilidae	Family	BOLD:ACF6346
GMGML709-14	Diptera	Neoascia meticulosa	Neoascia meticulosa	Species	BOLD:ABA2608	17	Neoascia meticulosa[15], Neoascia tenur[2], Neoascia geniculata[1]						GMGRF237-13	Diptera	Cecidomyiidae	Family	BOLD:ACH2999	4			GMGRC2655-13	Diptera	Mycetophilidae	Family	BOLD:ACG4262
GMGMI650-14	Diptera	Neoitamus socius	Neoitamus socius	Species	BOLD:ABV5341	14	Neoitamus socius[13], Neoitamus cyanurus[1]						GMGRF473-13	Diptera	Phoridae	Family	BOLD:ACH3003	2			GMGRC305-13	Hymenoptera	Platygastridae	Family	BOLD:ACF6345
GMGRE2796-13	Diptera	Cordyla	NO TAXONOMY	Species	BOLD:AAY5643	154	Cordyla crassicornis[5], Cordyla brevicornis[2]						GMGRF2056-13	Diptera	Cecidomyiidae	Family	BOLD:ACH3004	65			GMGRD1895-13	Hymenoptera	Braconidae	Family	BOLD:ACG5319
GMGMJ763-14	Diptera	Aphanotrigonum	NO TAXONOMY	Species	BOLD:ACB9088	93	Aphanotrigonum nigripes[51], Aphanotrigonum trilineatum[5]						GMGRF1810-13	Diptera	Cecidomyiidae	Family	BOLD:ACH3005	8			GMGRD3055-13	Coleoptera	Cantharidae	Family	BOLD:ACG4257
GMGMM1198-14	Diptera	Agromyzidae	NO TAXONOMY	Species	BOLD:ACE0334	8	Liriomyza eupatorii[3], Liriomyza bryoniae[1]						GMGRF261-13	Diptera	Cecidomyiidae	Family	BOLD:ACH3006	2			GMGRD609-13	Diptera	Cecidomyiidae	Family	BOLD:ACG4115
GMGRC935-13	Diptera	Iteaphila	NO TAXONOMY	Species	BOLD:ACD3033	34	Iteaphila sp. 1[5], Iteaphila sp. 2[1], Iteaphila nitidula[1]						GMGRE1384-13	Diptera	Cecidomyiidae	Family	BOLD:ACH3603	163			GMGRD1137-13	Diptera	Cecidomyiidae	Family	BOLD:ACG3582
GMGRB1448-13	Diptera	Scathophaga	NO TAXONOMY	Species	BOLD:AAD0853	555	Scathophaga stercoraria[320], Scathophaga hiemalis[1]						GMGMK1397-14	Diptera	Cecidomyiidae	Family	BOLD:ACH4373	27			GMGRD1140-13	Diptera	Cecidomyiidae	Family	BOLD:ACG3580
GMGMA1448-14	Diptera	Scathophaga	NO TAXONOMY	Species	BOLD:ACU4370	31	Scathophaga inquinata[10], Scathophaga lutaria[1], Scathophaga furcata[1]						GMGRD392-13	Diptera	Chloropidae	Family	BOLD:ACI1389	2			GMGRD655-13	Diptera	Cecidomyiidae	Family	BOLD:ACQ8459
GMGMI013-14	Diptera	Parasyrphus	NO TAXONOMY	Species	BOLD:AAZ4514	34	Parasyrphus punctulatus[19], Parasyrphus macularis[3]						GMGRE966-13	Diptera	Anthomyiidae	Family	BOLD:ACI2757	3			GMGRD587-13	Diptera	Cecidomyiidae	Family	BOLD:ACG4633
GMGMN914-14	Diptera	Macquartia	NO TAXONOMY	Species	BOLD:AAN9586	13	Macquartia tenebricosa[7], Macquartia plumbea[3], Macquartia praefica[1]						GMGRH1026-13	Diptera	Cecidomyiidae	Family	BOLD:ACI3225	24			GMGRD648-13	Diptera	Cecidomyiidae	Family	BOLD:ACG3461
GMGMN616-14	Diptera	Scatopsciara	NO TAXONOMY	Species	BOLD:AAU6764	35	Scatopsciara nana[10], Scatopsciara vitripennis[2]						GMGRF1809-13	Diptera	Chloropidae	Family	BOLD:ACI3426	9			GMGRD2319-13	Diptera	Cecidomyiidae	Family	BOLD:ACG3217
GMGMN1302-14	Diptera	Platypalpus	NO TAXONOMY	Species	BOLD:AAF9772	842	Platypalpus major[23], Platypalpus harpiger[19], Platypalpus sp. 24[5]						GMGRF301-13	Diptera	Ceratopogonidae	Family	BOLD:ACI3427	69			GMGRD2222-13	Diptera	Cecidomyiidae	Family	BOLD:ACG3633
GMGMD633-14	Diptera	Ceratopogonidae	NO TAXONOMY	Species	BOLD:ACF1108	9	Culicoides obsoletus[18], Culicoides obsoletus O3 MA-2012[6], Culicoides obsoletus O1 MA-2012[1], Culicoides obsoletus O2 MA-2012[1]						GMGMC344-14	Diptera	Cecidomyiidae	Family	BOLD:ACI4027	52			GMGRD2138-13	Diptera	Cecidomyiidae	Family	BOLD:ACG3636
GMGRB1431-13	Diptera	Krenopelopia	NO TAXONOMY	Species	BOLD:AAI2213	16	Krenopelopia sp.[3], Krenopelopia sp. BOLDAAI2213[1]						GMGRG1328-13	Diptera	Mycetophilidae	Family	BOLD:ACI4210	7			GMGRD2063-13	Diptera	Cecidomyiidae	Family	BOLD:ACG3432
GMGMB666-14	Diptera	Krenopelopia	NO TAXONOMY	Species	BOLD:AAC9198	11	Krenopelopia sp. BOLDAAC9198[2], Krenopelopia sp.[1]						GMGRF2314-13	Diptera	Cecidomyiidae	Family	BOLD:ACI4212	3			GMGRD1157-13	Diptera	Cecidomyiidae	Family	BOLD:ACG3391
GMGMA599-14	Diptera	Sepsis	NO TAXONOMY	Species	BOLD:AAJ7599	79	Sepsis fulgens[7], Sepsis orthocnemis[6], Sepsis fulgensxorthocnemis[1]						GMGRE3699-13	Diptera	Cecidomyiidae	Family	BOLD:ACI4214	2			GMGRD1183-13	Diptera	Cecidomyiidae	Family	BOLD:ACG3041
GMGMH1538-14	Diptera	Hydrophoria	NO TAXONOMY	Species	BOLD:ACD2354	28	Hydrophoria ruralis[6], Hydrophoria silvicola[3]						GMGRE2033-13	Diptera	Cecidomyiidae	Family	BOLD:ACI4217	10			GMGRD1198-13	Diptera	Cecidomyiidae	Family	BOLD:ACG4015
GMGMI456-14	Diptera	Lucilia	NO TAXONOMY	Species	BOLD:AAA6618	274	Lucilia sericata[182], Lucilia cuprina[65], Lucilia magnicornis[5], Lucilia cuprina x sericata[2], Lucilia sp. MATM-2012[1], Lucilia silvarum[1], Lucilia illustris[1], Lucilia porphyrina[1]						GMGRH1541-13	Diptera	Cecidomyiidae	Family	BOLD:ACI4346	2			GMGRD915-13	Diptera	Cecidomyiidae	Family	BOLD:ACG3812
GMGMI1378-14	Diptera	Mycetophila	NO TAXONOMY	Species	BOLD:ACJ2585	14	Mycetophila sordida[4], Mycetophila uninotata[1], Mycetophila ichneumonea[1], Mycetophila evanida[1]						GMGRE2470-13	Diptera	Phoridae	Family	BOLD:ACI4663	9			GMGRD3396-13	Diptera	Cecidomyiidae	Family	BOLD:ACG7228
GMGMI449-14	Diptera	Pipiza	NO TAXONOMY	Species	BOLD:AAL4100	132	Pipiza bimaculata[28], Pipiza noctiluca[26], Pipiza femoralis[17], Pipiza austriaca[12], Pipiza fenestrata[3], Pipiza noctiluca-agg.[1], Pipiza notata[1], Pipiza quadrimaculata[1], Pipiza lugubris[1], Pipiza festiva[1], Pipiza macrofemoralis[1]						GMGRE2631-13	Diptera	Hybotidae	Family	BOLD:ACI4664	4			GMGRD910-13	Diptera	Cecidomyiidae	Family	BOLD:ACG3611
GMGMC867-14	Diptera	Platycheirus	NO TAXONOMY	Species	BOLD:ACF4733	80	Platycheirus angustatus[37], Platycheirus europaeus[9], Platycheirus angustatus3[8], Platycheirus pennipes[4], Platycheirus angustatus2[3], Platycheirus occultus[1]						GMGRF2872-13	Diptera	Cecidomyiidae	Family	BOLD:ACI4666	3			GMGRD1267-13	Diptera	Cecidomyiidae	Family	BOLD:ACQ9161
GMGRF5590-13	Diptera	Phaonia	NO TAXONOMY	Species	BOLD:AAC0888	384	Phaonia serva[300], Phaonia savonoskii[53]						GMGRE2612-13	Diptera	Hybotidae	Family	BOLD:ACI4787	3			GMGRD1283-13	Diptera	Cecidomyiidae	Family	BOLD:ACG3145
GMGMN958-14	Diptera	Fannia	NO TAXONOMY	Species	BOLD:ACB3656	48	Fannia lustrator[9], Fannia sp1[1], Fannia pallitibia[1]						GMGRG4129-13	Diptera	Cecidomyiidae	Family	BOLD:ACI4952	10			GMGRD1398-13	Diptera	Cecidomyiidae	Family	BOLD:ACG2967
GMGMB671-14	Diptera	Pollenia	NO TAXONOMY	Species	BOLD:AAH3035	424	Pollenia rudis[166], Pollenia sp. BS-2012[1]						GMGRE2717-13	Diptera	Cecidomyiidae	Family	BOLD:ACI5024	2			GMGRD3100-13	Diptera	Cecidomyiidae	Family	BOLD:ACG3337
GMGMK1575-14	Diptera	Culicoides	NO TAXONOMY	Species	BOLD:AAO7718	90	Culicoides obsoletus[86], Culicoides obsoletus gp[4], Culicoides obsoletus-scoticus[1]						GMGRF708-13	Diptera	Cecidomyiidae	Family	BOLD:ACI5316	10			GMGRD1406-13	Diptera	Cecidomyiidae	Family	BOLD:ACG3677
GMGMH1588-14	Diptera	Sylvicola	NO TAXONOMY	Species	BOLD:AAG1996	765	Sylvicola cinctus[48], Sylvicola fenestralis[4]						GMGRF3980-13	Diptera	Chloropidae	Family	BOLD:ACI5317	10			GMGRD876-13	Diptera	Cecidomyiidae	Family	BOLD:ACG3612
GMGMK710-14	Diptera	Tricimba	NO TAXONOMY	Species	BOLD:AAG1502	125	Tricimba sp. TAW3[60], Tricimba cincta[1]						GMGRF3639-13	Diptera	Cecidomyiidae	Family	BOLD:ACI5476	2			GMGRD751-13	Diptera	Cecidomyiidae	Family	BOLD:ACG4326
GMGRF5606-13	Diptera	Gaurax	NO TAXONOMY	Species	BOLD:AAV6132	18	Gaurax pallidipes[2], Gaurax maculipennis[1]						GMGRF885-13	Diptera	Cecidomyiidae	Family	BOLD:ACI5477	15			GMGRD865-13	Diptera	Cecidomyiidae	Family	BOLD:ACG3615
GMGMH865-14	Diptera	Psychoda	NO TAXONOMY	Species	BOLD:AAF9311	49	Psychoda satchelli[2], Psychoda cf. satchelli[1]						GMGMC1554-14	Diptera	Cecidomyiidae	Family	BOLD:ACI5478	16			GMGRD2626-13	Diptera	Cecidomyiidae	Family	BOLD:ACG4606
GMGMK1587-14	Diptera	Forcipomyia	NO TAXONOMY	Species	BOLD:AAN5148	342	Forcipomyia bipunctata[190], Forcipomyia sp. CK-2012[3]						GMGRG2687-13	Diptera	Cecidomyiidae	Family	BOLD:ACI5479	2			GMGRD2597-13	Diptera	Cecidomyiidae	Family	BOLD:ACG4666
GMGMA1030-14	Diptera	Rachispoda	NO TAXONOMY	Species	BOLD:AAG6826	186	Rachispoda PK04[24], Rachispoda sp. 1[3], Rachispoda sp. 4[2]						GMGRF559-13	Diptera	Cecidomyiidae	Family	BOLD:ACI5718	8			GMGRD2486-13	Diptera	Cecidomyiidae	Family	BOLD:ACG4619
GMGRF185-13	Diptera	Allodia	NO TAXONOMY	Species	BOLD:ABA3404	10	Allodia sp.[1], Allodia ornaticollis[1], Allodia lundstroemi[1]						GMGRF672-13	Diptera	Cecidomyiidae	Family	BOLD:ACI5746	10			GMGRD2407-13	Diptera	Cecidomyiidae	Family	BOLD:ACG3093
GMGRB1413-13	Diptera	Oscinella	NO TAXONOMY	Species	BOLD:AAB1148	450	Oscinella sp. TAW3[19], Oscinella sp. 4[8], Oscinella sp. TAW5[1], Oscinella sp.[1], Oscinella sp. TAW4[1]						GMGRF2613-13	Diptera	Cecidomyiidae	Family	BOLD:ACI6139	4			GMGRD538-13	Diptera	Cecidomyiidae	Family	BOLD:ACG3714
GMGRD1479-13	Diptera	Elachiptera	NO TAXONOMY	Species	BOLD:AAD8113	13	Elachiptera sibirica[4], Elachiptera tuberculifera[2]						GMGRF724-13	Diptera	Cecidomyiidae	Family	BOLD:ACI6441	40			GMGRD614-13	Diptera	Cecidomyiidae	Family	BOLD:ACG4635
GMGMK471-14	Diptera	Oscinella	NO TAXONOMY	Species	BOLD:ABZ3875	161	Oscinella sp. 4[14], Oscinella nigerrima[1]						GMGMM631-14	Diptera	Cecidomyiidae	Family	BOLD:ACI6442	16			GMGRD474-13	Diptera	Cecidomyiidae	Family	BOLD:ACO2753
GMGMK480-14	Diptera	Hylemya	NO TAXONOMY	Species	BOLD:ABA6492	174	Hylemya vagans[11], Hylemya nigrimana[4]						GMGRF504-13	Diptera	Phoridae	Family	BOLD:ACI6592	3			GMGRD624-13	Diptera	Ceratopogonidae	Family	BOLD:ACG4587
GMGMA829-14	Diptera	Cetema	NO TAXONOMY	Species	BOLD:AAF4096	46	Cetema elongatum[5], Cetema sp. 2[3], Cetema myopinum[2], Cetema cereris[2], Cetema neglectum[1]						GMGML1309-14	Diptera	Cecidomyiidae	Family	BOLD:ACI6951	2			GMGRD3254-13	Diptera	Ceratopogonidae	Family	BOLD:ACG7143
GMGMJ519-14	Diptera	Diplonevra	NO TAXONOMY	Species	BOLD:ACB3653	51	Diplonevra funebris[19], Diplonevra freyi[1]						GMGMA170-14	Diptera	Cecidomyiidae	Family	BOLD:ACI7021	35			GMGRD1663-13	Diptera	Ceratopogonidae	Family	BOLD:ACG4548
GMGRG1651-13	Diptera	Chrysotus	NO TAXONOMY	Species	BOLD:AAG9659	1195	Chrysotus neglectus[9], Chrysotus femoratus[2], Chrysotus gramineus[1]						GMGRF2524-13	Diptera	Cecidomyiidae	Family	BOLD:ACI7046	6			GMGRD2607-13	Diptera	Ceratopogonidae	Family	BOLD:ACG4667
GMGMA1138-14	Diptera	Megaselia	NO TAXONOMY	Species	BOLD:ACB1013	486	Megaselia pulicaria-komplex[2], Megaselia angusta[1]						GMGRF1817-13	Diptera	Cecidomyiidae	Family	BOLD:ACI7083	1			GMGRD3108-13	Diptera	Chloropidae	Family	BOLD:ACG3333
GMGMN1274-14	Diptera	Lycoriella	NO TAXONOMY	Species	BOLD:ABA1215	583	Lycoriella castanescens[416], Lycoriella sativae[11]						GMGRF700-13	Diptera	Cecidomyiidae	Family	BOLD:ACI7129	2			GMGRD233-13	Hymenoptera	Eulophidae	Family	BOLD:ACG3738
GMGMM1440-14	Diptera	Diadocidia	NO TAXONOMY	Species	BOLD:AAY7756	20	Diadocidia ferruginosa[13], Diadocidia sp.[1]						GMGRF669-13	Diptera	Cecidomyiidae	Family	BOLD:ACI7130	3			GMGRD815-13	Diptera	Hybotidae	Family	BOLD:ACG2925
GMGRC2911-13	Diptera	Scaeva	NO TAXONOMY	Species	BOLD:AAF2374	36	Scaeva pyrastri[19], Scaeva albomaculata[10], Scaeva dignota[1]						GMGRF3023-13	Diptera	Ceratopogonidae	Family	BOLD:ACI7668	6			GMGRD3562-13	Trombidiformes	Hydryphantidae	Family	BOLD:ACI4906
GMGRC2239-13	Diptera	Sarcophaga	NO TAXONOMY	Species	BOLD:AAX9423	117	Sarcophaga carnaria[19], Sarcophaga variegata[2], Sarcophaga jeanleclercqi[1], Sarcophaga pyrenaica[1]						GMGRB863-13	Diptera	Cecidomyiidae	Family	BOLD:ACI7903	6			GMGRD257-13	Hymenoptera	Ichneumonidae	Family	BOLD:ACG3739
GMGMC578-14	Diptera	Exechia	NO TAXONOMY	Species	BOLD:ACH3001	7	Exechia JKJ-spJ[2], Exechia chandleri[1]						GMGRF1171-13	Diptera	Cecidomyiidae	Family	BOLD:ACI7920	7			GMGRD926-13	Hymenoptera	Ichneumonidae	Family	BOLD:ACG4850
GMGMK1467-14	Diptera	Oscinella	NO TAXONOMY	Species	BOLD:AAB1151	15	Oscinella nitidissima[3], Oscinella ventricosi[1], Oscinella sp. 4[1]						GMGRF2031-13	Diptera	Cecidomyiidae	Family	BOLD:ACI7957	9			GMGRD3165-13	Hymenoptera	Ichneumonidae	Family	BOLD:ACI4512
GMGRA760-13	Diptera	Psychoda	NO TAXONOMY	Species	BOLD:ACG1924	49	Psychoda albipennis[5], Psychoda cf. satchelli[5], Psychoda satchelli[1]						GMGRF2044-13	Diptera	Cecidomyiidae	Family	BOLD:ACI7958	3			GMGRD678-13	Diptera	Mycetophilidae	Family	BOLD:ACG4926
GMGMJ1303-14	Diptera	Megaselia	NO TAXONOMY	Species	BOLD:ABA6997	22	Megaselia vestita[1], Megaselia altifrons[1]						GMGRF3588-13	Diptera	Sciaridae	Family	BOLD:ACI8084	2			GMGRD3354-13	Hymenoptera	Mymaridae	Family	BOLD:ACI4314
GMGRD3634-13	Diptera	Lonchoptera	NO TAXONOMY	Species	BOLD:ABX0277	54	Lonchoptera lutea[19], Lonchoptera nitidifrons[1], Lonchoptera flava[1]						GMGRF4299-13	Diptera	Cecidomyiidae	Family	BOLD:ACI8085	6			GMGRD1802-13	Sarcoptiformes	Oribatulidae	Family	BOLD:ACG5108
GMGMN293-14	Diptera	Sphaeroceridae	NO TAXONOMY	Species	BOLD:ABY1126	24	Minilimosina parva[8], Minilimosina parvula[2]						GMGRF3456-13	Diptera	Mycetophilidae	Family	BOLD:ACI8126	9			GMGRD3131-13	Diptera	Phoridae	Family	BOLD:ACG3334
GMGMB361-14	Diptera	Fannia	NO TAXONOMY	Species	BOLD:ABW2012	25	Fannia postica[14], Fannia serena[3]						GMGRF4289-13	Diptera	Cecidomyiidae	Family	BOLD:ACI8197	3			GMGRD113-13	Diptera	Phoridae	Family	BOLD:ACG4196
GMGMK462-14	Diptera	Sarcophaga	NO TAXONOMY	Species	BOLD:AAZ0264	130	Sarcophaga variegata[19], Sarcophaga lehmanni[7], Sarcophaga croatica[1]						GMGRF3934-13	Diptera	Cecidomyiidae	Family	BOLD:ACI8202	5			GMGRD2120-13	Diptera	Phoridae	Family	BOLD:ACG3435
GMGRE2795-13	Diptera	Calliphora	NO TAXONOMY	Species	BOLD:AAB6579	359	Calliphora vicina[276], Calliphora alaskensis[27], Calliphora loewi[13], Calliphora subalpina[3], Calliphora croceipalpis[1], Calliphora pattoni[1], Calliphora icina[1]						GMGRF4952-13	Diptera	Phoridae	Family	BOLD:ACI8210	6			GMGRD2713-13	Diptera	Phoridae	Family	BOLD:ACG2938
GMGML1103-14	Diptera	Eumea	NO TAXONOMY	Species	BOLD:AAC1602	65	Eumea caesar[32], Eumea linearicornis[5], Eumea mitis[3], Eumea Wood01[2]						GMGRF4157-13	Diptera	Cecidomyiidae	Family	BOLD:ACI8237	17			GMGRD1748-13	Hymenoptera	Platygastridae	Family	BOLD:ACI4633
GMGMB841-14	Diptera	Psychoda	NO TAXONOMY	Species	BOLD:AAF9317	545	Psychoda phalaenoides[37], Psychoda cf. phalaenoides[1]						GMGRF5178-13	Diptera	Cecidomyiidae	Family	BOLD:ACI8238	3			GMGRD3360-13	Hymenoptera	Platygastridae	Family	BOLD:ACI4313
GMGMN1224-14	Diptera	Mycetophila	NO TAXONOMY	Species	BOLD:ABU8760	46	Mycetophila ocellus[29], Mycetophila signatoides[1]						GMGRF4277-13	Diptera	Cecidomyiidae	Family	BOLD:ACI8290	5			GMGRD2925-13	Hymenoptera	Platygastridae	Family	BOLD:ACI4510
GMGRA786-13	Diptera	Oscinella	NO TAXONOMY	Species	BOLD:AAB1152	67	Oscinella sp. 4[6], Oscinella sp. TAW5[3]						GMGRF6050-13	Diptera	Ceratopogonidae	Family	BOLD:ACI8539	3			GMGRD1744-13	Hymenoptera	Platygastridae	Family	BOLD:ACI5140
GMGMC704-14	Diptera	Megaselia	NO TAXONOMY	Species	BOLD:AAG3264	72	Megaselia lata[1], Megaselia eccoptomera[1]						GMGRF5184-13	Diptera	Cecidomyiidae	Family	BOLD:ACI8629	6			GMGRD3168-13	Hymenoptera	Platygastridae	Family	BOLD:ACI4655
GMGMN1329-14	Diptera	Mycetophila	NO TAXONOMY	Species	BOLD:AAP8158	66	Mycetophila sp. CJB3[13], Mycetophila signatoides[3]						GMGRF2777-13	Diptera	Dolichopodidae	Family	BOLD:ACI8719	3			GMGRE2620-13	Diptera	Agromyzidae	Family	BOLD:ACI4786
GMGMA690-14	Diptera	Mycetophila	NO TAXONOMY	Species	BOLD:AAY8340	5	Mycetophila distigma[3], Mycetophila flava[1]						GMGRG304-13	Diptera	Cecidomyiidae	Family	BOLD:ACI9286	2			GMGRE2432-13	Diptera	Agromyzidae	Family	BOLD:ACI4793
GMGRD2817-13	Diptera	Bradysia	NO TAXONOMY	Species	BOLD:AAM9243	1621	Bradysia polonica[629], Bradysia atroparva[104]						GMGRG455-13	Diptera	Cecidomyiidae	Family	BOLD:ACI9412	2			GMGRE713-13	Hymenoptera	Braconidae	Family	BOLD:ACG7730
GMGMH1540-14	Diptera	Sphaeroceridae	NO TAXONOMY	Species	BOLD:AAN6415	30	Spelobia quinata[7], Spelobia parapusio[1]						GMGRG1818-13	Diptera	Cecidomyiidae	Family	BOLD:ACI9414	8			GMGRE3351-13	Hymenoptera	Braconidae	Family	BOLD:ACI5001
GMGMJ1572-14	Diptera	Dicranomyia	NO TAXONOMY	Species	BOLD:AAI1352	34	Dicranomyia modesta[4], Dicranomyia sp.[3]						GMGRG425-13	Diptera	Cecidomyiidae	Family	BOLD:ACI9425	3			GMGRE1627-13	Hymenoptera	Braconidae	Family	BOLD:ACG8042
GMGMM344-14	Diptera	Eristalis	NO TAXONOMY	Species	BOLD:AAA8223	123	Eristalis arbustorum[74], Eristalis brousii[37]						GMGMC1325-14	Diptera	Phoridae	Family	BOLD:ACI9454	15			GMGRE3452-13	Diptera	Cecidomyiidae	Family	BOLD:ACI4213
GMGMC878-14	Diptera	Thereva	NO TAXONOMY	Species	BOLD:ACQ9229	21	Thereva nobilitata[5], Thereva unica[1]						GMGRF1251-13	Diptera	Cecidomyiidae	Family	BOLD:ACI9539	5			GMGRE3759-13	Diptera	Cecidomyiidae	Family	BOLD:ACW3112
GMGML1232-14	Diptera	Sarcophaga	NO TAXONOMY	Species	BOLD:ACB4532	26	Sarcophaga similis[14], Sarcophaga crassipalpis[4], Sarcophaga aratrix[3]						GMGRF6121-13	Diptera	Cecidomyiidae	Family	BOLD:ACI9549	4			GMGRE2646-13	Diptera	Cecidomyiidae	Family	BOLD:ACI4667
GMGMI578-14	Diptera	Macronychia	NO TAXONOMY	Species	BOLD:ACS4210	3	Macronychia striginervis[1], Macronychia dolini[1]						GMGRG096-13	Diptera	Phoridae	Family	BOLD:ACI9559	4			GMGRE1946-13	Diptera	Cecidomyiidae	Family	BOLD:ACJ0838
GMGRC797-13	Diptera	Cheilosia	NO TAXONOMY	Species	BOLD:AAW3607	11	Cheilosia aerea[2], Cheilosia zetterstedt[2], Cheilosia proxima[1]						GMGRF4722-13	Diptera	Cecidomyiidae	Family	BOLD:ACI9560	3			GMGRE1965-13	Diptera	Cecidomyiidae	Family	BOLD:ACK5975
GMGMN1239-14	Diptera	Paragus	NO TAXONOMY	Species	BOLD:ABZ4619	164	Paragus politus[31], Paragus haemorrhous[20], Paragus tibialis[10], Paragus constrictus[1], Paragus cf. haemorrhous[1], Paragus aff. haemorrhous[1]						GMGRG3221-13	Diptera	Cecidomyiidae	Family	BOLD:ACI9561	12			GMGRE1838-13	Diptera	Cecidomyiidae	Family	BOLD:ACQ0892
GMGMN1208-14	Diptera	Sciophila	NO TAXONOMY	Species	BOLD:AAN8583	16	Sciophila sp. CJB1[6], Sciophila lutea[2], Sciophila pseudoflexuosa[1], Sciophila rufa[1]						GMGRG129-13	Diptera	Phoridae	Family	BOLD:ACI9617	2			GMGRE2465-13	Diptera	Cecidomyiidae	Family	BOLD:ACI4662
GMGMM440-14	Diptera	Sarcophaga	NO TAXONOMY	Species	BOLD:AAE9461	39	Sarcophaga albiceps[29], Sarcophaga crassipalpis[1]						GMGRF6233-13	Diptera	Cecidomyiidae	Family	BOLD:ACI9701	3			GMGRE501-13	Diptera	Cecidomyiidae	Family	BOLD:ACG6315
GMGML413-14	Diptera	Microchrysa	NO TAXONOMY	Species	BOLD:AAN6506	60	Microchrysa polita[44], Microchrysa flavicornis[2]						GMGRG1263-13	Diptera	Phoridae	Family	BOLD:ACI9730	4			GMGRE2715-13	Diptera	Cecidomyiidae	Family	BOLD:ACI4665
GMGMK1083-14	Diptera	Simulium	NO TAXONOMY	Species	BOLD:AAM4036	64	Simulium lineatum[20], Simulium balcanicum[19], Simulium equinum[6]						GMGRF5970-13	Diptera	Cecidomyiidae	Family	BOLD:ACJ0836	4			GMGRE088-13	Diptera	Cecidomyiidae	Family	BOLD:ACG7119
GMGMB066-14	Diptera	Anthomyia	NO TAXONOMY	Species	BOLD:ACE4540	88	Anthomyia liturata[5], Anthomyia confusanea[2]						GMGRF2743-13	Diptera	Heleomyzidae	Family	BOLD:ACJ0932	2			GMGRE559-13	Diptera	Cecidomyiidae	Family	BOLD:ACG5421
GMGMA402-14	Diptera	Solieria	NO TAXONOMY	Species	BOLD:AAV8821	46	Solieria pacifica[9], Solieria inanis[1]						GMGRG2617-13	Diptera	Cecidomyiidae	Family	BOLD:ACJ1068	2			GMGRE835-13	Diptera	Cecidomyiidae	Family	BOLD:ACG5398
GMGRG3942-13	Diptera	Dolichopus	NO TAXONOMY	Species	BOLD:ACA4620	18	Dolichopus plumipes[5], Dolichopus simplex[1]						GMGMA1360-14	Diptera	Phoridae	Family	BOLD:ACJ1069	2			GMGRE850-13	Diptera	Cecidomyiidae	Family	BOLD:ACG5312
GMGMN1276-14	Diptera	Platypalpus	NO TAXONOMY	Species	BOLD:AAF9771	173	Platypalpus trivialis[27], Platypalpus longiseta[6], Platypalpus pallidiventris[5], Platypalpus sp. 5[3], Platypalpus sp. 17[2]						GMGRE1964-13	Diptera	Cecidomyiidae	Family	BOLD:ACJ1071	6			GMGRE1078-13	Diptera	Cecidomyiidae	Family	BOLD:ACG5553
GMGMM1429-14	Diptera	Eristalis	NO TAXONOMY	Species	BOLD:ABU6609	20	Eristalis horticola[12], Eristalis lineata[4], Eristalis picea[2], Eristalis pertinax[1]						GMGRG2520-13	Diptera	Phoridae	Family	BOLD:ACJ1099	2			GMGRE1059-13	Diptera	Cecidomyiidae	Family	BOLD:ACG8248
GMGMK1196-14	Diptera	Exorista	NO TAXONOMY	Species	BOLD:AAG2163	26	Exorista rustica[10], Exorista mimula[2], Exorista tubulosa[1], Exorista glossatorum[1], Exorista tubigera[1]						GMGRG2651-13	Diptera	Cecidomyiidae	Family	BOLD:ACJ1101	3			GMGRE1046-13	Diptera	Cecidomyiidae	Family	BOLD:ACG8250
GMGMK1559-14	Diptera	Eristalis	NO TAXONOMY	Species	BOLD:AAE4458	33	Eristalis interrupta[19], Eristalis nemorum[5], Eristalis hirta[2], Eristalis arbustorum[1]						GMGRE1885-13	Diptera	Cecidomyiidae	Family	BOLD:ACJ1102	2			GMGRE653-13	Diptera	Cecidomyiidae	Family	BOLD:ACG5290
GMGMC724-14	Diptera	Scatella	NO TAXONOMY	Species	BOLD:AAG2738	580	Scatella tenuicosta[86], Scatella stagnalis[1]						GMGRG1729-13	Diptera	Cecidomyiidae	Family	BOLD:ACJ1103	10			GMGRE1388-13	Diptera	Cecidomyiidae	Family	BOLD:ACG8243
GMGMF131-14	Diptera	Acanthiophilus	NO TAXONOMY	Species	BOLD:AAD2434	17	Acanthiophilus helianthi[12], Acanthiophilus walkeri[1]						GMGRG2597-13	Diptera	Cecidomyiidae	Family	BOLD:ACJ1180	2			GMGRE1361-13	#N/A	Cecidomyiidae	Family	BOLD:ACX1120
GMGML1512-14	Diptera	Neoascia	NO TAXONOMY	Species	BOLD:AAZ1434	17	Neoascia podagrica[11], Neoascia tenur[3], Neoascia obliqua[1], Neoascia clausseni[1]						GMGRG1310-13	Diptera	Mycetophilidae	Family	BOLD:ACJ2562	34			GMGRE063-13	Diptera	Cecidomyiidae	Family	BOLD:ACG7118
GMGMA105-14	Diptera	Meromyza	NO TAXONOMY	Species	BOLD:ACB6581	7	Meromyza lidiae[2], Meromyza mosquensis[1]						GMGRH344-13	Diptera	Phoridae	Family	BOLD:ACJ2619	13			GMGRE1217-13	Diptera	Cecidomyiidae	Family	BOLD:ACG6871
GMGML654-14	Diptera	Meromyza	NO TAXONOMY	Species	BOLD:AAF9323	3	Meromyza sp. 3[1], Meromyza sp. 1[1]						GMGRH2276-13	Diptera	Keroplatidae	Family	BOLD:ACJ2682	13			GMGRE3768-13	Diptera	Dolichopodidae	Family	BOLD:ACI4345
GMGMH895-14	Diptera	Siphona	NO TAXONOMY	Species	BOLD:ACB0218	29	Siphona collini[9], Siphona maculata[2]						GMGRH038-13	Diptera	Phoridae	Family	BOLD:ACJ2733	32			GMGRE3732-13	Diptera	Empididae	Family	BOLD:ACI4209
GMGMK251-14	Diptera	Meromyza	NO TAXONOMY	Species	BOLD:AAF9324	12	Meromyza nigriventris[3], Meromyza rostrata[3], Meromyza sp. 3[1], Meromyza saltatrix[1]						GMGRH342-13	Diptera	Phoridae	Family	BOLD:ACJ2823	4			GMGRE3357-13	Hymenoptera	Eulophidae	Family	BOLD:ACI4333
GMGMH1437-14	Diptera	Platypalpus	NO TAXONOMY	Species	BOLD:AAN5505	50	Platypalpus nr. minutus[5], Platypalpus australominutus[4], Platypalpus minutus[3]						GMGRF2775-13	Diptera	Rhagionidae	Family	BOLD:ACJ2828	2			GMGRE3306-13	Hymenoptera	Eulophidae	Family	BOLD:ACI4760
GMGME534-14	Diptera	Fannia	NO TAXONOMY	Species	BOLD:ABA2388	23	Fannia aff. subsimilis[2], Fannia sp.[1], Fannia postica[1], Fannia serena[1]						GMGRH596-13	Diptera	Cecidomyiidae	Family	BOLD:ACJ2848	3			GMGRE432-13	Diptera	Hybotidae	Family	BOLD:ACG6314
GMGMA457-14	Diptera	Linnaemya	NO TAXONOMY	Species	BOLD:AAZ3879	17	Linnaemya tessellans[6], Linnaemya comta[1]						GMGRH891-13	Diptera	Mycetophilidae	Family	BOLD:ACJ2889	8			GMGRE2497-13	Hymenoptera	Ichneumonidae	Family	BOLD:ACI4038
GMGMN1001-14	Diptera	Eristalis	NO TAXONOMY	Species	BOLD:AAY9892	11	Eristalis similis[5], Eristalis pratorum[4]						GMGRG1258-13	Diptera	Mycetophilidae	Family	BOLD:ACJ2991	3			GMGRE1467-13	Hymenoptera	Ichneumonidae	Family	BOLD:ACG7102
GMGRG4304-13	Diptera	Platycheirus	NO TAXONOMY	Species	BOLD:AAC6630	345	Platycheirus nearcticus[99], Platycheirus naso[67], Platycheirus holarcticus[27], Platycheirus peltatus[24], Platycheirus inversus[23], Platycheirus peltatoides[17], Platycheirus nielseni[17], Platycheirus jaerensis[10], Platycheirus amplus[5], Platycheirus cf. peltatus[1], Platycheirus octavus[1]						GMGRG4055-13	Diptera	Cecidomyiidae	Family	BOLD:ACJ2992	26			GMGRE701-13	Hymenoptera	Ichneumonidae	Family	BOLD:ACG7732
GMGMJ1509-14	Diptera	Baccha	NO TAXONOMY	Species	BOLD:ABA3006	23	Baccha elongata[15], Baccha obscuripennis[3], Baccha sachalinica[1]						GMGRG2950-13	Diptera	Cecidomyiidae	Family	BOLD:ACJ3008	3			GMGRE3905-13	Diptera	Mycetophilidae	Family	BOLD:ACI4951
GMGRE2485-13	Diptera	Opomyza	NO TAXONOMY	Species	BOLD:AAG3914	15	Opomyza germinationis[12], Opomyza florum[1]						GMGRG3826-13	Diptera	Cecidomyiidae	Family	BOLD:ACJ3009	2			GMGRE097-13	Diptera	Phoridae	Family	BOLD:ACG7231
GMGRB1537-13	Diptera	Cheilosia	NO TAXONOMY	Species	BOLD:AAW3618	10	Cheilosia caerulescens[6], Cheilosia kerteszi[1], Cheilosia antiqua[1]						GMGRG4118-13	Diptera	Cecidomyiidae	Family	BOLD:ACJ3010	2			GMGRE2466-13	Diptera	Phoridae	Family	BOLD:ACI4791
GMGMI577-14	Diptera	Pollenia	NO TAXONOMY	Species	BOLD:AAP2825	146	Pollenia angustigena[34], Pollenia rudis[8]						GMGRG1669-13	Diptera	Cecidomyiidae	Family	BOLD:ACJ3081	3			GMGRE415-13	Diptera	Phoridae	Family	BOLD:ACG8360
GMGMJ648-14	Diptera	Macronychia	NO TAXONOMY	Species	BOLD:ACS4211	5	Macronychia striginervis[2], Macronychia agrestis[1]						GMGRG1683-13	Diptera	Cecidomyiidae	Family	BOLD:ACJ3083	2			GMGRE309-13	Diptera	Phoridae	Family	BOLD:ACG7931
GMGMD338-14	Diptera	Xanthogramma	NO TAXONOMY	Species	BOLD:AAH9313	31	Xanthogramma pedissequum[7], Xanthogramma evanescens[3], Xanthogramma stackelbergi[1], Xanthogramma festivum[1], Xanthogramma citrofasciatum[1]						GMGRG2729-13	Diptera	Cecidomyiidae	Family	BOLD:ACJ3086	2			GMGRE3567-13	Hymenoptera	Platygastridae	Family	BOLD:ACI4336
GMGML1159-14	Diptera	Epistrophe	NO TAXONOMY	Species	BOLD:ACE4705	37	Epistrophe nitidicollis[24], Epistrophe olgae[2], Epistrophe melanostoma[2]						GMGRG2718-13	Diptera	Cecidomyiidae	Family	BOLD:ACJ3096	2			GMGRE2220-13	Hymenoptera	Platygastridae	Family	BOLD:ACI3320
GMGMI439-14	Diptera	Volucella	NO TAXONOMY	Species	BOLD:AAB8627	88	Volucella facialis[23], Volucella bombylans[18], Volucella evecta[15], Volucella arctica[9], Volucella nigroabdominalis[3], Volucella bombylans complex[2], Volucella sp. 6[2], Volucella sp. 2[1], Volucella sp. 7[1], Volucella jeddona[1], Volucella plumatoides[1], Volucella sp. 1[1]						GMGRI804-13	Diptera	Cecidomyiidae	Family	BOLD:ACJ3109	2			GMGRE3536-13	Hymenoptera	Platygastridae	Family	BOLD:ACI5002
GMGRE3352-13	Diptera	Linnaemya	NO TAXONOMY	Species	BOLD:AAN3557	14	Linnaemya picta[6], Linnaemya tessellans[1], Linnaemya rossica[1]						GMGRG3683-13	Diptera	Cecidomyiidae	Family	BOLD:ACJ3157	1			GMGRF4379-13	Hymenoptera	Braconidae	Family	BOLD:ACI8951
GMGMA331-14	Diptera	Cheilosia	NO TAXONOMY	Species	BOLD:AAW3609	46	Cheilosia bardus[21], Cheilosia albitarsis[18], Cheilosia ranunculi[4]						GMGRG4138-13	Diptera	Cecidomyiidae	Family	BOLD:ACJ3190	2			GMGRF757-13	Diptera	Cecidomyiidae	Family	BOLD:ACI6871
GMGRC2784-13	Diptera	Cheilosia	NO TAXONOMY	Species	BOLD:AAW3615	20	Cheilosia impressa[12], Cheilosia barbata[4], Cheilosia ahenea[1]						GMGMN1105-14	Diptera	Phoridae	Family	BOLD:ACJ3203	2			GMGRF809-13	Diptera	Cecidomyiidae	Family	BOLD:ACI7131
GMGMJ1008-14	Diptera	Cheilosia	NO TAXONOMY	Species	BOLD:AAW3647	51	Cheilosia vicina[12], Cheilosia nigripes[8], Cheilosia nasutula[5], Cheilosia impudens[2], Cheilosia ahenea[2], Cheilosia sahlbergi[2], Cheilosia vangaveri[1], Cheilosia pedemontana[1], Cheilosia aff. grisella[1], Cheilosia antiqua[1]						GMGMM1245-14	Diptera	Cecidomyiidae	Family	BOLD:ACJ3214	6			GMGRF767-13	Diptera	Cecidomyiidae	Family	BOLD:ACI5245
GMGMH1537-14	Diptera	Sylvicola	NO TAXONOMY	Species	BOLD:AAL7534	318	Sylvicola stackelbergii 1[12], Sylvicola punctatus[10], Sylvicola stackelbergii[7]						GMGRF6042-13	Diptera	Cecidomyiidae	Family	BOLD:ACJ3231	2			GMGRF5187-13	Diptera	Cecidomyiidae	Family	BOLD:ACI9130
GMGMA366-14	Diptera	Anthomyia	NO TAXONOMY	Species	BOLD:AAQ0583	82	Anthomyia pluvialis[18], Anthomyia procellaris[12]						GMGRG434-13	Diptera	Cecidomyiidae	Family	BOLD:ACJ3232	2			GMGRF5213-13	Diptera	Cecidomyiidae	Family	BOLD:ACI9133
GMGMC288-14	Diptera	Beris	NO TAXONOMY	Species	BOLD:AAG7026	60	Beris chalybata[7], Beris clavipes[1], Beris chalybeata[1]						GMGRG3076-13	Diptera	Cecidomyiidae	Family	BOLD:ACJ3241	3			GMGRF3941-13	Diptera	Cecidomyiidae	Family	BOLD:ACI8240
GMGMH495-14	Diptera	Siphona	NO TAXONOMY	Species	BOLD:AAG2108	60	Siphona geniculata[19], Siphona nr. geniculata sp. 1[4], Siphona urbana[1], Siphona rossica[1]						GMGRG2025-13	Diptera	Cecidomyiidae	Family	BOLD:ACJ3263	3			GMGRF2224-13	Diptera	Cecidomyiidae	Family	BOLD:ACI5662
GMGMC644-14	Diptera	Fannia	NO TAXONOMY	Species	BOLD:ABA2351	10	Fannia mutica[8], Fannia lepida[1]						GMGRF4819-13	Diptera	Cecidomyiidae	Family	BOLD:ACJ3273	2			GMGRF6063-13	Diptera	Cecidomyiidae	Family	BOLD:ACJ3331
GMGMH843-14	Diptera	Simulium	NO TAXONOMY	Species	BOLD:AAB8783	31	Simulium monticola[22], Simulium argyreatum[1]						GMGRH847-13	Diptera	Mycetophilidae	Family	BOLD:ACJ3281	4			GMGRF5819-13	Diptera	Cecidomyiidae	Family	BOLD:ACJ0834
GMGRG1128-13	Diptera	Lasiomma	NO TAXONOMY	Species	BOLD:AAL7525	123	Lasiomma nr. picipes[4], Lasiomma japonicum[2], Lasiomma spBOLDAAL7525[1], Lasiomma picipes[1]						GMGRF1108-13	Diptera	Cecidomyiidae	Family	BOLD:ACJ3285	2			GMGRF5715-13	Diptera	Cecidomyiidae	Family	BOLD:ACJ0627
GMGRC2183-13	Diptera	Cricotopus	NO TAXONOMY	Species	BOLD:AAU2576	11	Cricotopus trifascia[3], Cricotopus trifascia group sp. AJ-2011[1]						GMGRG3538-13	Diptera	Cecidomyiidae	Family	BOLD:ACJ3286	50			GMGRF6158-13	Diptera	Cecidomyiidae	Family	BOLD:ACI9390
GMGMB399-14	Diptera	Fannia	NO TAXONOMY	Species	BOLD:AAG4632	181	Fannia corvina[22], Fannia ringdahlana[1], Fannia carbonaria[1]						GMGRG2958-13	Diptera	Cecidomyiidae	Family	BOLD:ACJ3308	17			GMGRF6080-13	Diptera	Cecidomyiidae	Family	BOLD:ACJ3269
GMGMH1253-14	Diptera	Eudasyphora	NO TAXONOMY	Species	BOLD:ABZ1424	67	Eudasyphora canadiana[26], Eudasyphora cyanicolor[6], Eudasyphora sp.[2]						GMGRG4738-13	Diptera	Cecidomyiidae	Family	BOLD:ACJ3384	2			GMGRF6180-13	Diptera	Cecidomyiidae	Family	BOLD:ACI9431
GMGMC1386-14	Diptera	Pollenia	NO TAXONOMY	Species	BOLD:ACD3713	71	Pollenia rudis[1], Pollenia hungarica[1]						GMGMC1240-14	Diptera	Cecidomyiidae	Family	BOLD:ACJ3412	3			GMGRF6173-13	Diptera	Cecidomyiidae	Family	BOLD:ACI9685
GMGRF763-13	Diptera	Cheilosia	NO TAXONOMY	Species	BOLD:AAK0980	14	Cheilosia soror[7], Cheilosia scutellata[1], Cheilosia longula[1]						GMGRG1842-13	Diptera	Cecidomyiidae	Family	BOLD:ACJ3430	6			GMGRF4305-13	Diptera	Cecidomyiidae	Family	BOLD:ACI8086
GMGRE3516-13	Diptera	Platycheirus	NO TAXONOMY	Species	BOLD:AAG4665	122	Platycheirus scutatus[31], Platycheirus speighti[19], Platycheirus splendidus[11], Platycheirus cf. scutatus[2], Platycheirus atlasi[1], Platycheirus aurolateralis[1], Platycheirus scutatus complex[1]						GMGRG4732-13	Diptera	Cecidomyiidae	Family	BOLD:ACJ3434	18			GMGRF5197-13	Diptera	Cecidomyiidae	Family	BOLD:ACI9132
GMGRE1470-13	Diptera	Rhagoletis	NO TAXONOMY	Species	BOLD:AAD5126	28	Rhagoletis cerasi[25], Rhagoletis flavicincta[1]						GMGRF4246-13	Diptera	Cecidomyiidae	Family	BOLD:ACJ3442	3			GMGRF2320-13	Diptera	Cecidomyiidae	Family	BOLD:ACR0947
GMGMM338-14	Diptera	Fannia	NO TAXONOMY	Species	BOLD:AAF7101	160	Fannia canicularis[69], Fannia subpubescens[2]						GMGRG1737-13	Diptera	Cecidomyiidae	Family	BOLD:ACJ3450	3			GMGRF858-13	Diptera	Cecidomyiidae	Family	BOLD:ACO2750
GMGRE741-13	Diptera	Physocephala	NO TAXONOMY	Species	BOLD:AAL5216	20	Physocephala rufipes[2], Physocephala nigra[1], Physocephala laticincta[1]						GMGRG2453-13	Diptera	Cecidomyiidae	Family	BOLD:ACJ3453	3			GMGRF874-13	Diptera	Cecidomyiidae	Family	BOLD:ACK5424
GMGMN1223-14	Diptera	Orthonevra	NO TAXONOMY	Species	BOLD:AAQ1272	13	Orthonevra nobilis[10], Orthonevra brevicornis[1]						GMGRG1052-13	Diptera	Phoridae	Family	BOLD:ACJ3463	21			GMGRF3742-13	Diptera	Cecidomyiidae	Family	BOLD:ACI8195
GMGMI003-14	Diptera	Eudorylas	NO TAXONOMY	Species	BOLD:ACD2786	7	Eudorylas zonellus[1], Eudorylas inferus[1], Eudorylas fuscipes[1]						GMGMN703-14	Diptera	Cecidomyiidae	Family	BOLD:ACJ3477	6			GMGRF4927-13	Diptera	Cecidomyiidae	Family	BOLD:ACK5108
GMGML1454-14	Diptera	Paragus	NO TAXONOMY	Species	BOLD:ABA3664	25	Paragus pecchiolii[11], Paragus majoranae[3]						GMGRG4720-13	Diptera	Cecidomyiidae	Family	BOLD:ACJ3530	4			GMGRF3774-13	Diptera	Cecidomyiidae	Family	BOLD:ACI8289
GMGMJ842-14	Diptera	Eudorylas	NO TAXONOMY	Species	BOLD:ACD2487	17	Eudorylas jenkinsoni[2], Eudorylas sp. Spain1[1]						GMGMJ1512-14	Diptera	Ceratopogonidae	Family	BOLD:ACJ3536	4			GMGRF3829-13	Diptera	Cecidomyiidae	Family	BOLD:ACI8083
GMGMM1586-14	Diptera	Chrysotoxum	NO TAXONOMY	Species	BOLD:AAJ0967	25	Chrysotoxum bicinctum[15], Chrysotoxum volaticum[2], Chrysotoxum veralli[2]						GMGRG2707-13	Diptera	Cecidomyiidae	Family	BOLD:ACJ3537	13			GMGRF4023-13	Diptera	Cecidomyiidae	Family	BOLD:ACI8239
GMGMJ336-14	Diptera	Cheilosia	NO TAXONOMY	Species	BOLD:AAG7027	107	Cheilosia pagana[29], Cheilosia uviformis[1], Cheilosia albitarsis[1]						GMGRG751-13	Diptera	Cecidomyiidae	Family	BOLD:ACJ4201	2			GMGRF4036-13	Diptera	Cecidomyiidae	Family	BOLD:ACI8242
GMGRD3706-13	Diptera	Fannia	NO TAXONOMY	Species	BOLD:AAD9983	26	Fannia bifimbriata[3], Fannia manicata[2], Fannia enotahensis[2], Fannia atripes[2], Fannia monilis[1]						GMGML554-14	Diptera	Cecidomyiidae	Family	BOLD:ACJ4725	2			GMGRF2252-13	Diptera	Cecidomyiidae	Family	BOLD:ACI5918
GMGRB1505-13	Diptera	Conchapelopia	NO TAXONOMY	Species	BOLD:AAW5799	5	Conchapelopia sp. AJ-2011[1], Conchapelopia hittmairorum[1]						GMGRH1283-13	Diptera	Cecidomyiidae	Family	BOLD:ACJ4928	2			GMGRF5787-13	Diptera	Cecidomyiidae	Family	BOLD:ACJ0625
GMGMM675-14	Diptera	Cerodontha	NO TAXONOMY	Species	BOLD:AAM6329	9	Cerodontha pygmaea[1], Cerodontha incisa[1]						GMGRI363-13	Diptera	Mycetophilidae	Family	BOLD:ACJ4957	2			GMGRF3983-13	Diptera	Cecidomyiidae	Family	BOLD:ACI8201
GMGMJ288-14	Diptera	Blondelia	NO TAXONOMY	Species	BOLD:AAN4077	16	Blondelia nigripes[13], Blondelia migripes[1]						GMGRG2663-13	Diptera	Cecidomyiidae	Family	BOLD:ACJ4978	2			GMGRF5974-13	Diptera	Cecidomyiidae	Family	BOLD:ACJ0626
GMGMJ1408-14	Diptera	Platypalpus	NO TAXONOMY	Species	BOLD:ACE1335	6	Platypalpus calceatus[4], Platypalpus calccutus[1]						GMGRH1614-13	Diptera	Cecidomyiidae	Family	BOLD:ACJ5055	2			GMGRF2226-13	Diptera	Ceratopogonidae	Family	BOLD:ACI5917
GMGRC2896-13	Diptera	Phytomyza	NO TAXONOMY	Species	BOLD:AAL4268	88	Phytomyza crassiseta[44], Phytomyza flavofemorata[1]						GMGRI527-13	Diptera	Diptera	Family	BOLD:ACJ5219	9			GMGRF4544-13	Hymenoptera	Cynipidae	Family	BOLD:ACJ0571
GMGMA1488-14	Diptera	Tomosvaryella	NO TAXONOMY	Species	BOLD:ACD8703	5	Tomosvaryella sp. Isreal8[1], Tomosvaryella sp. Isreal7[1]						GMGRH1665-13	Diptera	Cecidomyiidae	Family	BOLD:ACJ5222	17			GMGRF1933-13	Hymenoptera	Diapriidae	Family	BOLD:ACJ0974
GMGML1109-14	Diptera	Epistrophe	NO TAXONOMY	Species	BOLD:AAI5313	14	Epistrophe grossulariae[10], Epistrophe glossulariae[2]						GMGRI771-13	Diptera	Mycetophilidae	Family	BOLD:ACJ5305	2			GMGRF3356-13	Hymenoptera	Diapriidae	Family	BOLD:ACJ0621
GMGMB363-14	Diptera	Ferdinandea	NO TAXONOMY	Species	BOLD:AAQ4090	13	Ferdinandea ruficornis[6], Ferdinandea cuprea[1]						GMGRI564-13	Diptera	Cecidomyiidae	Family	BOLD:ACJ5306	3			GMGRF4348-13	Hymenoptera	Eulophidae	Family	BOLD:ACI8669
GMGMJ676-14	Diptera	Bessa	NO TAXONOMY	Species	BOLD:AAW3422	5	Bessa selecta[2], Bessa sp. 1[1], Bessa harveyi[1]						GMGRH2259-13	Diptera	Cecidomyiidae	Family	BOLD:ACJ5429	3			GMGRF123-13	Diptera	Hybotidae	Family	BOLD:ACH3000
GMGMM415-14	Diptera	Ormosia ruficauda	Ormosia ruficauda	Species	BOLD:ABV9669	11	Ormosia ruficauda[10], Ormosia pseudosimilis[1]						GMGRH2431-13	Diptera	Cecidomyiidae	Family	BOLD:ACJ5431	2			GMGRF6217-13	Diptera	Hybotidae	Family	BOLD:ACI9389
GMGMJ954-14	Diptera	Paragus bicolor	Paragus bicolor	Species	BOLD:AAF8068	11	Paragus bicolor[6], Paragus flammeus[1], Paragus finitimus[1]						GMGRG4774-13	Diptera	Cecidomyiidae	Family	BOLD:ACJ5434	17			GMGRF5591-13	Hymenoptera	Ichneumonidae	Family	BOLD:ACJ1020
GMGMC402-14	Diptera	Paraphaenocladius pseudirritus	Paraphaenocladius pseudirritus	Species	BOLD:AAC4194	16	Paraphaenocladius pseudirritus[12], Paraphaenocladius cf. pseudirritus[3]						GMGRH2396-13	Diptera	Cecidomyiidae	Family	BOLD:ACJ5462	3			GMGRF5465-13	Hymenoptera	Ichneumonidae	Family	BOLD:ACJ3513
GMGMM686-14	Diptera	Parasyrphus annulatus	Parasyrphus annulatus	Species	BOLD:ABY4785	22	Parasyrphus annulatus[21], Parasyrphus lineolus[1]						GMGRI735-13	Diptera	Cecidomyiidae	Family	BOLD:ACJ5515	5			GMGRF997-13	Hymenoptera	Ichneumonidae	Family	BOLD:ACJ0615
GMGMN1374-14	Diptera	Parasyrphus vittiger	Parasyrphus vittiger	Species	BOLD:ACE7140	22	Parasyrphus vittiger[8], Parasyrphus lineolus[6], Parasyrphus lineola[2], Parasyrphus nr. lineolus[1]						GMGRH1469-13	Diptera	Cecidomyiidae	Family	BOLD:ACJ5534	2			GMGRF3089-13	Diptera	Lauxaniidae	Family	BOLD:ACI8372
GMGRC896-13	Diptera	Pegomya flavifrons	Pegomya flavifrons	Species	BOLD:AAG2479	116	Pegomya flavifrons[37], Pegomya solennis[1]						GMGRH1256-13	Diptera	Phoridae	Family	BOLD:ACJ5537	2			GMGRF5528-13	Trombidiformes	Lebertiidae	Family	BOLD:ACN9808
GMGRD2883-13	Diptera	Pegomya winthemi	Pegomya winthemi	Species	BOLD:AAG1783	49	Pegomya winthemi[21], Pegomya solennis[1]						GMGML586-14	Diptera	Cecidomyiidae	Family	BOLD:ACK2812	8			GMGRF6247-13	Hymenoptera	Megaspilidae	Family	BOLD:ACW1542
GMGRD1916-13	Diptera	Pegomya zonata	Pegomya zonata	Species	BOLD:AAG2506	1586	Pegomya incisiva[21], Pegomya vittigera[16], Pegomya circumpolaris[14], Pegomya zonata[10], Pegomya notabilis[10], Pegomya scapularis[8], Pegomya pulchripes[2], Pegomya Incisiva[1], Pegomya tenera[1], Pegomya tabida[1], Pegomya sp. WA9a[1]						GMGRF1196-13	Diptera	Chironomidae	Family	BOLD:ACK5239	3			GMGRF3116-13	Diptera	Mycetophilidae	Family	BOLD:ACI8212
GMGMA597-14	Diptera	Phaonia meigeni	Phaonia meigeni	Species	BOLD:ABU8931	396	Phaonia meigeni[13], Phaonia alpicola[4]						GMGRF2852-13	Diptera	Cecidomyiidae	Family	BOLD:ACK5835	2			GMGRF6255-13	Hymenoptera	Mymaridae	Family	BOLD:ACJ1041
GMGME330-14	Diptera	Phronia strenua	Phronia strenua	Species	BOLD:ABA1330	18	Phronia strenua[17], Phronia caliginosa[1]						GMGMC1569-14	Diptera	Chloropidae	Family	BOLD:ACK6112	5			GMGRF455-13	Diptera	Phoridae	Family	BOLD:ACH9333
GMGRG4272-13	Diptera	Platycheirus parmatus	Platycheirus parmatus	Species	BOLD:AAM1271	30	Platycheirus parmatus[29], Platycheirus holarcticus[1]						GMGML537-14	Diptera	Cecidomyiidae	Family	BOLD:ACL3713	14			GMGRF3837-13	Diptera	Phoridae	Family	BOLD:ACI8200
GMGMN1287-14	Diptera	Polietes lardarius	Polietes lardarius	Species	BOLD:AAY2766	52	Polietes lardarius[41], Polietes meridionalis[11]						GMGRG4754-13	Diptera	Cecidomyiidae	Family	BOLD:ACL4513	7			GMGRF2142-13	Diptera	Phoridae	Family	BOLD:ACI6910
GMGMB1402-14	Diptera	Pollenia labialis	Pollenia labialis	Species	BOLD:AAI2765	90	Pollenia labialis[73], Pollenia rudis[1]						GMGRE1985-13	Diptera	Cecidomyiidae	Family	BOLD:ACM1165	218			GMGRF3105-13	Diptera	Phoridae	Family	BOLD:ACI8214
GMGML698-14	Diptera	Rheocricotopus cf. effusus	Rheocricotopus cf. effusus	Species	BOLD:ACH2822	8	Rheocricotopus effusus[2], Rheocricotopus cf. effusus[1]						GMGRD2469-13	Diptera	Cecidomyiidae	Family	BOLD:ACM1467	9			GMGRF4434-13	Hymenoptera	Platygastridae	Family	BOLD:ACI8892
GMGRG1441-13	Diptera	Sarcophaga depressifrons	Sarcophaga depressifrons	Species	BOLD:ABV4597	212	Sarcophaga depressifrons[206], Sarcophaga haemorrhoa[9], Sarcophaga bulgarica[1]						GMGRD912-13	Diptera	Cecidomyiidae	Family	BOLD:ACN2112	2			GMGRF4356-13	Hymenoptera	Platygastridae	Family	BOLD:ACJ0807
GMGMB133-14	Diptera	Sarcophaga depressifrons	Sarcophaga depressifrons	Species	BOLD:ABV4597	212	Sarcophaga depressifrons[206], Sarcophaga haemorrhoa[9], Sarcophaga bulgarica[1]						GMGMC330-14	Diptera	Agromyzidae	Family	BOLD:ACN2619	10			GMGRF609-13	Hymenoptera	Platygastridae	Family	BOLD:ACI9089
GMGRG4902-13	Diptera	Scaptomyza flava	Scaptomyza flava	Species	BOLD:ACF3890	38	Scaptomyza flava[36], Scaptomyza pallida[1]						GMGMC549-14	Diptera	Cecidomyiidae	Family	BOLD:ACN3741	10			GMGRF4472-13	Hymenoptera	Platygastridae	Family	BOLD:ACI8742
GMGME283-14	Diptera	Sciapus platypterus	Sciapus platypterus	Species	BOLD:ABU9505	40	Sciapus platypterus[35], Sciapus spiniger[1]						GMGMD867-14	Diptera	Agromyzidae	Family	BOLD:ACN4131	6			GMGRF4490-13	Hymenoptera	Platygastridae	Family	BOLD:ACJ0978
GMGMD624-14	Diptera	Sciara hemerobioides	Sciara hemerobioides	Species	BOLD:ACQ8933	3	Sciara analis[2], Sciara hemerobioides[1]						GMGMA1285-14	Diptera	Cecidomyiidae	Family	BOLD:ACN4609	3			GMGRF981-13	Hymenoptera	Pteromalidae	Family	BOLD:ACJ0688
GMGMH1446-14	Diptera	Sciophila lutea	Sciophila lutea	Species	BOLD:AAY7973	11	Sciophila lutea[7], Sciophila buxtoni[1]						GMGMN1111-14	Diptera	Lauxaniidae	Family	BOLD:ACN5464	2			GMGRF1393-13	Diptera	Sciaridae	Family	BOLD:ACK6830
GMGRC1285-13	Diptera	Sepsis duplicata	Sepsis duplicata	Species	BOLD:AAJ7592	15	Sepsis secunda[9], Sepsis duplicata[5]						GMGRD2458-13	Diptera	Cecidomyiidae	Family	BOLD:ACN7341	5			GMGRF6358-13	Diptera	Therevidae	Family	BOLD:ACJ6963
GMGME109-14	Diptera	Sericomyia militaris	Sericomyia militaris	Species	BOLD:AAB1553	99	Sericomyia militaris[58], Sericomyia silentis[22], Sericomyia lappona[14], Sericomyia borealis[1]						GMGMB263-14	Diptera	Cecidomyiidae	Family	BOLD:ACO0678	4			GMGRG1152-13	Hymenoptera	Braconidae	Family	BOLD:ACJ1075
GMGME387-14	Diptera	Simulium vernum	Simulium vernum	Species	BOLD:AAB8624	47	Simulium vernum[23], Simulium cryophilum[4], Simulium crenobium[3]						GMGMK1449-14	Diptera	Phoridae	Family	BOLD:ACO0933	7			GMGRG2618-13	Diptera	Cecidomyiidae	Family	BOLD:ACJ1100
GMGMN184-14	Diptera	Spelobia luteilabris	Spelobia luteilabris	Species	BOLD:AAL7752	142	Spelobia luteilabris[104], Spelobia semioculata[1]						GMGRD641-13	Diptera	Cecidomyiidae	Family	BOLD:ACO2752	12			GMGRG1196-13	Diptera	Cecidomyiidae	Family	BOLD:ACJ3067
GMGMC666-14	Diptera	Sphaerophoria novaeangliae	Sphaerophoria novaeangliae	Species	BOLD:AAG2778	61	Sphaerophoria novaeangliae[49], Sphaerophoria shirchan[2]						GMGMD903-14	Diptera	Cecidomyiidae	Family	BOLD:ACO2948	5			GMGRG1695-13	Diptera	Cecidomyiidae	Family	BOLD:ACJ3082
GMGML410-14	Diptera	Syrphus torvus	Syrphus torvus	Species	BOLD:AAC6088	105	Syrphus torvus[89], Syrphus ribesii[1]						GMGMC1282-14	Diptera	Cecidomyiidae	Family	BOLD:ACO3310	5			GMGRG2856-13	Diptera	Cecidomyiidae	Family	BOLD:ACJ3276
GMGMC1000-14	Diptera	Tachina lurida	Tachina lurida	Species	BOLD:ACA9827	6	Tachina lurida[5], Tachina ursina[1]						GMGRD1316-13	Diptera	Cecidomyiidae	Family	BOLD:ACO3793	13			GMGRG2864-13	Diptera	Cecidomyiidae	Family	BOLD:ACJ3277
GMGMC427-14	Diptera	Tomosvaryella sylvatica	Tomosvaryella sylvatica	Species	BOLD:AAG1660	53	Tomosvaryella kuthyi[8], Tomosvaryella sp. AK3[6], Tomosvaryella sylvatica[3], Tomosvaryella sp. GK-1[1]						GMGMB925-14	Diptera	Chloropidae	Family	BOLD:ACO3866	25			GMGRG3390-13	Diptera	Cecidomyiidae	Family	BOLD:ACJ3284
GMGMM945-14	Diptera	Trichosia edwardsi	Trichosia edwardsi	Species	BOLD:ACD8591	38	Trichosia edwardsi[22], Trichosia habilis[3]						GMGMJ1240-14	Diptera	Cecidomyiidae	Family	BOLD:ACO6737	6			GMGRG2017-13	Diptera	Cecidomyiidae	Family	BOLD:ACJ3457
GMGMA441-14	Diptera	Xanthochlorus tenellus	Xanthochlorus tenellus	Species	BOLD:ACD1482	54	Xanthochlorus tenellus[50], Xanthochlorus ornatus[1]						GMGMB209-14	Diptera	Cecidomyiidae	Family	BOLD:ACO7408	4			GMGRG4069-13	Diptera	Cecidomyiidae	Family	BOLD:ACJ3385
GMGMJ630-14	Diptera	Xylophagus junki	Xylophagus junki	Species	BOLD:ABA2553	19	Xylophagus ater[11], Xylophagus junki[2]						GMGMM1175-14	Diptera	Cecidomyiidae	Family	BOLD:ACO7512	3			GMGRG359-13	Diptera	Cecidomyiidae	Family	BOLD:ACI9580
GMGMB643-14	Diptera	Xylota jakutorum	Xylota jakutorum	Species	BOLD:ACE4264	24	Xylota jakutorum[18], Xylota meigeniana[2], Xylota coeruleiventris[2], Xylota caeruleiventris[1]						GMGMD688-14	Diptera	Cecidomyiidae	Family	BOLD:ACO7521	15			GMGRG199-13	Diptera	Cecidomyiidae	Family	BOLD:ACI9731
GMGME361-14	Entomobryomorpha	Entomobrya	NO TAXONOMY	Species	BOLD:ACL6239	9025	Entomobrya nivalis[3689], Entomobrya sp.[35]						GMGMB1527-14	Diptera	Cecidomyiidae	Family	BOLD:ACO7652	2			GMGRG354-13	Diptera	Cecidomyiidae	Family	BOLD:ACI9514
GMGRE1656-13	Hemiptera	Adelges laricis	Adelges laricis	Species	BOLD:AAB1463	62	Adelges laricis[40], Adelges tardus[10], Adelges laricis-tardus compl[3]						GMGRF4770-13	Diptera	Cecidomyiidae	Family	BOLD:ACO7743	8			GMGRG4593-13	Diptera	Cecidomyiidae	Family	BOLD:ACJ3382
GMGMC986-14	Hemiptera	Evacanthus orbitalis	Evacanthus orbitalis	Species	BOLD:AAG8846	398	Evacanthus orbitalis[395], Evacanthus nigramericanus[3]						GMGRF6048-13	Diptera	Cecidomyiidae	Family	BOLD:ACO8177	2			GMGRG4679-13	Diptera	Cecidomyiidae	Family	BOLD:ACJ3193
GMGMB1207-14	Hemiptera	Megalonotus chiragra	Megalonotus chiragra	Species	BOLD:AAF4462	25	Megalonotus sabulicola[18], Megalonotus chiragra[5]						GMGMD861-14	Diptera	Cecidomyiidae	Family	BOLD:ACO8319	6			GMGRG3858-13	Diptera	Cecidomyiidae	Family	BOLD:ACJ3052
GMGRB1376-13	Hemiptera	Metopolophium dirhodum	Metopolophium dirhodum	Species	BOLD:AAE7796	69	Metopolophium dirhodum[67], Metopolophium albidum[1]						GMGMD1235-14	Diptera	Cecidomyiidae	Family	BOLD:ACO8436	2			GMGRG3790-13	Diptera	Cecidomyiidae	Family	BOLD:ACJ3354
GMGMK464-14	Hemiptera	Brachycaudus	NO TAXONOMY	Species	BOLD:AAF5984	39	Brachycaudus lychnidis[20], Brachycaudus populi[14], Brachycaudus sp. C1760[1], Brachycaudus sp. C1752[1], Brachycaudus lychnicola[1], Brachycaudus divaricatae[1]						GMGRG2528-13	Diptera	Cecidomyiidae	Family	BOLD:ACO8487	12			GMGRG4849-13	Diptera	Cecidomyiidae	Family	BOLD:ACJ2503
GMGMM161-14	Hemiptera	Aphis	NO TAXONOMY	Species	BOLD:AAE7309	89	Aphis sambuci[27], Aphis horii[2]						GMGMB1111-14	Diptera	Cecidomyiidae	Family	BOLD:ACO9527	8			GMGRG3768-13	Diptera	Cecidomyiidae	Family	BOLD:ACJ3355
GMGMB673-14	Hemiptera	Hyalopterus	NO TAXONOMY	Species	BOLD:AAB9081	72	Hyalopterus pruni[232], Hyalopterus sp. A JDL-2007[8]						GMGMJ1116-14	Diptera	Cecidomyiidae	Family	BOLD:ACP0125	8			GMGRG3697-13	Diptera	Cecidomyiidae	Family	BOLD:ACJ3356
GMGMN037-14	Hemiptera	Aphis	NO TAXONOMY	Species	BOLD:ABY6751	64	Aphis salicariae[8], Aphis decepta[3]						GMGMK1278-14	Diptera	Hybotidae	Family	BOLD:ACP0330	2			GMGRG563-13	Diptera	Cecidomyiidae	Family	BOLD:ACI9413
GMGMA592-14	Hemiptera	Aphis	NO TAXONOMY	Species	BOLD:AAC1374	82	Aphis nasturtii[50], Aphis umbrella[6], Aphis cf. rostella[4], Aphis sp. rostella like[4], Aphis davletshinae[1], Aphis althaeae[1]						GMGMJ1205-14	Diptera	Phoridae	Family	BOLD:ACP0373	6			GMGRG4648-13	Diptera	Cecidomyiidae	Family	BOLD:ACJ3383
GMGME185-14	Hemiptera	Nabis	NO TAXONOMY	Species	BOLD:AAZ3346	37	Nabis brevis[12], Nabis pseudoferus[11], Nabis rugosus[6], Nabis ericetorum[6]						GMGML767-14	Diptera	Cecidomyiidae	Family	BOLD:ACP0608	3			GMGRG3603-13	Diptera	Cecidomyiidae	Family	BOLD:ACJ3287
GMGRA783-13	Hemiptera	Cercopis	NO TAXONOMY	Species	BOLD:AAZ8612	10	Cercopis vulnerata[1], Cercopis sanguinolenta[1]						GMGMB1347-14	Diptera	Sciaridae	Family	BOLD:ACP0919	12			GMGRG3583-13	Diptera	Cecidomyiidae	Family	BOLD:ACJ3108
GMGML195-14	Hemiptera	Nysius	NO TAXONOMY	Species	BOLD:ACB9324	10	Nysius senecionis[3], Nysius thymi[1]						GMGMJ1207-14	Diptera	Phoridae	Family	BOLD:ACP1058	18			GMGRG905-13	Diptera	Cecidomyiidae	Family	BOLD:ACJ3413
GMGRB1358-13	Hemiptera	Brachycaudus	NO TAXONOMY	Species	BOLD:AAE8278	64	Brachycaudus tragopogonis[27], Brachycaudus prunicola[10], Brachycaudus schwartzi[9], Brachycaudus sp. A rgf-2008[1]						GMGML798-14	Diptera	Cecidomyiidae	Family	BOLD:ACP1847	4			GMGRG3468-13	Diptera	Cecidomyiidae	Family	BOLD:ACJ3288
GMGML1216-14	Hemiptera	Megoura	NO TAXONOMY	Species	BOLD:AAF3463	31	Megoura viciae[15], Megoura crassicauda[4], Megoura nigra[2], Megoura litoralis[1]						GMGMJ1007-14	Diptera	Agromyzidae	Family	BOLD:ACP2136	2			GMGRG3352-13	Diptera	Cecidomyiidae	Family	BOLD:ACJ3107
GMGMN1215-14	Hemiptera	Stenodema	NO TAXONOMY	Species	BOLD:AAY9089	38	Stenodema laevigata[19], Stenodema laevigatum[3]						GMGMB281-14	Diptera	Phoridae	Family	BOLD:ACP2588	4			GMGRG3155-13	Diptera	Cecidomyiidae	Family	BOLD:ACJ3184
GMGMI453-14	Hemiptera	Brachycaudus	NO TAXONOMY	Species	BOLD:AAC1165	109	Brachycaudus cardui[76], Brachycaudus lateralis[17], Brachycaudus sp. C1765[1]						GMGMC1189-14	Diptera	Phoridae	Family	BOLD:ACP3075	3			GMGRG1718-13	Diptera	Cecidomyiidae	Family	BOLD:ACJ3038
GMGMJ1498-14	Hemiptera	Cryptomyzus	NO TAXONOMY	Species	BOLD:ABX5354	23	Cryptomyzus galeopsidis[19], Cryptomyzus sp. INRA CBGP ACOE1411chasses1411ACDA[1], Cryptomyzus sp.[1]						GMGMN679-14	Diptera	Pipunculidae	Family	BOLD:ACP3585	19			GMGRG3129-13	Diptera	Cecidomyiidae	Family	BOLD:ACJ3179
GMGMI064-14	Hemiptera	Aphis	NO TAXONOMY	Species	BOLD:ACL3217	14	Aphis sp.[2], Aphis jacobaeae[2], Aphis cacaliasteris[2]						GMGMA866-14	Diptera	Tachinidae	Family	BOLD:ACP3769	3			GMGRG1814-13	Diptera	Cecidomyiidae	Family	BOLD:ACJ3039
GMGRE1483-13	Hemiptera	Hyperomyzus	NO TAXONOMY	Species	BOLD:AAB8566	130	Hyperomyzus lactucae[108], Hyperomyzus carduellinus[3]						GMGMN1062-14	Diptera	Cecidomyiidae	Family	BOLD:ACP3853	2			GMGRG1826-13	Diptera	Cecidomyiidae	Family	BOLD:ACJ3431
GMGMA598-14	Hemiptera	Aphis	NO TAXONOMY	Species	BOLD:AAA3070	1114	Aphis gossypii[600], Aphis sp.[83], Aphis ruborum[22], Aphis affinis[11], Aphis sedi[11], Aphis confusa[10], Aphis taraxacicola[9], Aphis punicae[9], Aphis serpylli[8], Aphis cf. frangulae[8], Aphis sp. frangulae-like[8], Aphis oestlundi[8], Aphis viticis[6], Aphis plantaginis[6], Aphis crepidis[4], Aphis cisticola[4], Aphis nivalis[4], Aphis frangulae[4], Aphis origani[4], Aphis mamonthovae[4], …						GMGMC513-14	Diptera	Chloropidae	Family	BOLD:ACP4070	11			GMGRG1839-13	Diptera	Cecidomyiidae	Family	BOLD:ACJ3432
GMGMA734-14	Hemiptera	Dysaphis	NO TAXONOMY	Species	BOLD:AAK9769	50	Dysaphis crataegi[16], Dysaphis apiifolia[12], Dysaphis tulipae[7], Dysaphis crithmi[6], Dysaphis lauberti[4], Dysaphis angelicae[2], Dysaphis apiifolia apiifolia[1]						GMGMD1597-14	Diptera	Agromyzidae	Family	BOLD:ACP4174	5			GMGRG1950-13	Diptera	Cecidomyiidae	Family	BOLD:ACJ3377
GMGMJ1254-14	Hemiptera	Charagochilus	NO TAXONOMY	Species	BOLD:AAY9446	65	Charagochilus weberi[6], Charagochilus gyllenhalii[3]						GMGMC805-14	Diptera	Agromyzidae	Family	BOLD:ACP4350	2			GMGRG2054-13	Diptera	Cecidomyiidae	Family	BOLD:ACJ3262
GMGMM152-14	Hemiptera	Aphis	NO TAXONOMY	Species	BOLD:AAA4183	442	Aphis spiraecola[308], Aphis pomi[6]						GMGML614-14	Diptera	Phoridae	Family	BOLD:ACP4479	19			GMGRG2110-13	Diptera	Cecidomyiidae	Family	BOLD:ACJ3037
GMGMC994-14	Hemiptera	Plagiognathus	NO TAXONOMY	Species	BOLD:AAH9481	7	Plagiognathus arbustorum[20], Plagiognathus collaris[2]						GMGMC1210-14	Diptera	Dolichopodidae	Family	BOLD:ACP4861	3			GMGRG2944-13	Diptera	Cecidomyiidae	Family	BOLD:ACJ3227
GMGMC668-14	Hemiptera	Sitobion	NO TAXONOMY	Species	BOLD:ACE7315	329	Sitobion fragariae[10], Sitobion nr. fragariae IV-2006[2], Sitobion nr. fragariae PL2014[1], Sitobion nr. fragariae[1]						GMGMC484-14	Diptera	Agromyzidae	Family	BOLD:ACP5104	7			GMGRG2125-13	Diptera	Cecidomyiidae	Family	BOLD:ACJ3134
GMGML142-14	Hemiptera	Anoecia	NO TAXONOMY	Species	BOLD:AAH2871	47	Anoecia fulviabdominalis[41], Anoecia corni[2]						GMGMK1443-14	Diptera	Chloropidae	Family	BOLD:ACP5184	43			GMGRG2342-13	Diptera	Cecidomyiidae	Family	BOLD:ACJ3182
GMGMN297-14	Hemiptera	Aphis	NO TAXONOMY	Species	BOLD:AAH2855	29	Aphis cytisorum[21], Aphis ulicis[6], Aphis sarothamni[1]						GMGMI1210-14	Diptera	Chironomidae	Family	BOLD:ACP5613	6			GMGRG2357-13	Diptera	Cecidomyiidae	Family	BOLD:ACJ3271
GMGMK818-14	Hemiptera	Phytocoris	NO TAXONOMY	Species	BOLD:AAH9369	9	Phytocoris varipes[3], Phytocoris austriacus[1]						GMGMD650-14	Diptera	Cecidomyiidae	Family	BOLD:ACP5708	6			GMGRG2772-13	Diptera	Cecidomyiidae	Family	BOLD:ACJ3534
GMGRD3433-13	Hemiptera	Lygus	NO TAXONOMY	Species	BOLD:AAY8966	22	Lygus pratensis[8], Lygus wagneri[1], Lygus rugulipennis[1], Lygus gemellatus[1]						GMGRH1597-13	Diptera	Cecidomyiidae	Family	BOLD:ACP5708	6			GMGRG2766-13	Diptera	Cecidomyiidae	Family	BOLD:ACJ3275
GMGMA558-14	Hemiptera	Aphrodes	NO TAXONOMY	Species	BOLD:AAG2876	100	Aphrodes makarovi[74], Aphrodes costatus[1], Aphrodes bicinctus[1], Aphrodes bicincta[1]						GMGMC834-14	Diptera	Lonchaeinae	Family	BOLD:ACP5970	6			GMGRG2448-13	Diptera	Cecidomyiidae	Family	BOLD:ACJ3272
GMGML665-14	Hemiptera	Planaphrodes bifasciatus	Planaphrodes bifasciatus	Species	BOLD:ABY1124	5	Planaphrodes trifasciata[3], Planaphrodes bifasciatus[2]						GMGMI721-14	Diptera	Agromyzidae	Family	BOLD:ACP6151	5			GMGRG2456-13	Diptera	Cecidomyiidae	Family	BOLD:ACJ4202
GMGRF5649-13	Hemiptera	Rhopalosiphum insertum	Rhopalosiphum insertum	Species	BOLD:ABZ6546	21	Rhopalosiphum oxyacanthae[11], Rhopalosiphum insertum[7]						GMGMI572-14	Diptera	Agromyzidae	Family	BOLD:ACP6201	5			GMGRG2479-13	Diptera	Cecidomyiidae	Family	BOLD:ACJ3105
GMGMB857-14	Hymenoptera	Ametastegia equiseti	Ametastegia equiseti	Species	BOLD:AAJ2242	33	Ametastegia equiseti[31], Ametastegia glabrata[1]						GMGMC1110-14	Diptera	Cecidomyiidae	Family	BOLD:ACP6507	7			GMGRG2711-13	Diptera	Cecidomyiidae	Family	BOLD:ACJ3535
GMGMK084-14	Hymenoptera	Athalia rosae rosae	Athalia rosae rosae	Species	BOLD:AAD9316	37	Athalia rosae[20], Athalia rosae rosae[10], Athalia sp. Sus6[1], Athalia bicolor[1], Athalia liberta[1]						GMGMK1527-14	Diptera	Cecidomyiidae	Family	BOLD:ACP6689	2			GMGRG2529-13	Diptera	Ceratopogonidae	Family	BOLD:ACJ1070
GMGMC652-14	Hymenoptera	Bathythrix thomsoni	Bathythrix thomsoni	Species	BOLD:ABU6867	10	Bathythrix thomsoni[5], Bathythrix lamina[1]						GMGMC836-14	Diptera	Keroplatidae	Family	BOLD:ACP7560	11			GMGRG2063-13	Diptera	Chloropidae	Family	BOLD:ACJ3260
GMGRE1446-13	Hymenoptera	Bombus hortorum	Bombus hortorum	Species	BOLD:AAD2566	34	Bombus hortorum[35], Bombus hortorum ssp. hortorum[1], Bombus balteatus[1]						GMGRC2807-13	Diptera	Cecidomyiidae	Family	BOLD:ACP8095	17			GMGRG1891-13	Diptera	Chloropidae	Family	BOLD:ACJ3523
GMGMA445-14	Hymenoptera	Bombus sylvestris	Bombus sylvestris	Species	BOLD:AAB4516	40	Bombus sylvestris[39], Bombus norvegicus[1]						GMGMD914-14	Diptera	Phoridae	Family	BOLD:ACP8559	4			GMGRG4416-13	Hymenoptera	Diapriidae	Family	BOLD:ACJ2782
GMGMD281-14	Hymenoptera	Caliroa cothurnata	Caliroa cothurnata	Species	BOLD:AAP1057	6	Caliroa cothurnata[5], Caliroa cinxia[1]						GMGMC536-14	Diptera	Cecidomyiidae	Family	BOLD:ACP8730	9			GMGRG4025-13	Symphypleona	Dicyrtomidae	Family	BOLD:ACJ5322
GMGMA958-14	Hymenoptera	Camponotus herculeanus	Camponotus herculeanus	Species	BOLD:AAA2372	1186	Camponotus herculeanus[446], Camponotus novaeboracensis[36], Camponotus sp.[1], Camponotus pennsylvanicus[1]						GMGMB1048-14	Diptera	Dolichopodidae	Family	BOLD:ACP9444	32			GMGRG4238-13	Hymenoptera	Eulophidae	Family	BOLD:ACJ3522
GMGMA750-14	Hymenoptera	Cerceris quinquefasciata	Cerceris quinquefasciata	Species	BOLD:AAM5609	28	Cerceris quinquefasciata[26], Cerceris quadrifasciata quadrifasciata[2]						GMGMD1419-14	Diptera	Chironomidae	Family	BOLD:ACP9495	2			GMGRG4172-13	Hymenoptera	Eulophidae	Family	BOLD:ACJ3036
GMGMN1328-14	Hymenoptera	Chrysis schencki	Chrysis schencki	Species	BOLD:ACF6219	45	Chrysis schencki[41], Chrysis mediata[1]						GMGMC1584-14	Diptera	Ceratopogonidae	Family	BOLD:ACP9502	7			GMGRG1451-13	Hymenoptera	Ichneumonidae	Family	BOLD:ACJ3381
GMGMI075-14	Hymenoptera	Chrysis solida	Chrysis solida	Species	BOLD:AAY6949	87	Chrysis solida[66], Chrysis mediata[12], Chrysis ignita[9]						GMGMC508-14	Diptera	Cecidomyiidae	Family	BOLD:ACP9503	7			GMGRG1192-13	Hymenoptera	Ichneumonidae	Family	BOLD:ACJ1045
GMGRA764-13	Hymenoptera	Claremontia alternipes	Claremontia alternipes	Species	BOLD:AAJ1108	21	Claremontia alternipes[20], Claremontia waldheimii[1]						GMGMB092-14	Diptera	Cecidomyiidae	Family	BOLD:ACP9677	3			GMGRG1165-13	Hymenoptera	Ichneumonidae	Family	BOLD:ACP3594
GMGMD1513-14	Hymenoptera	Cotesia eulipis	Cotesia eulipis	Species	BOLD:ABZ3751	95	Cotesia jft07[34], Cotesia salebrosa[13], Cotesia jft29[6], Cotesia jft65[5], Cotesia eulipis[4], Cotesia jft64[3], Cotesia sp.[2], Cotesia jft28[2], Cotesia PK07[1], Cotesia jft99[1], Cotesia cf. numen[1]						GMGMB165-14	Diptera	Phoridae	Family	BOLD:ACQ1282	2			GMGRG4380-13	Hymenoptera	Megaspilidae	Family	BOLD:ACJ2662
GMGMC879-14	Hymenoptera	Crossocerus annulipes	Crossocerus annulipes	Species	BOLD:AAM3798	32	Crossocerus annulipes[32], Crossocerus distinguendus[1]						GMGMB929-14	Diptera	Lauxaniidae	Family	BOLD:ACQ1859	4			GMGRG676-13	Diptera	Mycetophilidae	Family	BOLD:ACJ3410
GMGME177-14	Hymenoptera	Crossocerus elongatulus	Crossocerus elongatulus	Species	BOLD:AAM3152	49	Crossocerus elongatulus[25], Crossocerus distinguendus[18], Crossocerus italicus[2]						GMGRG2020-13	Diptera	Cecidomyiidae	Family	BOLD:ACQ2059	2			GMGRG1296-13	Diptera	Mycetophilidae	Family	BOLD:ACJ3028
GMGRI009-13	Hymenoptera	Ctenichneumon melanocastanus	Ctenichneumon melanocastanus	Species	BOLD:AAE7746	8	Ctenichneumon melanocastanus[5], Ctenichneumon messorius[1], Ctenichneumon castigator[1]						GMGRC1769-13	Diptera	Sciaridae	Family	BOLD:ACQ2637	2			GMGRG2236-13	Diptera	Phoridae	Family	BOLD:ACJ3368
GMGMA400-14	Hymenoptera	Diplazon scutatorius	Diplazon scutatorius	Species	BOLD:AAL2105	20	Diplazon scutatorius[16], Diplazon tetragonus[1]						GMGMJ1524-14	Diptera	Chironomidae	Family	BOLD:ACQ3439	5			GMGRG3013-13	Diptera	Phoridae	Family	BOLD:ACJ3399
GMGMK352-14	Hymenoptera	Dipogon bifasciatus	Dipogon bifasciatus	Species	BOLD:ABU9027	11	Dipogon bifasciatus[12], Dipogon austriacus[4]						GMGRE1591-13	Diptera	Sciaridae	Family	BOLD:ACQ7807	2			GMGRG1938-13	Diptera	Phoridae	Family	BOLD:ACJ3378
GMGMI1426-14	Hymenoptera	Dolerus triplicatus	Dolerus triplicatus	Species	BOLD:AAL2307	37	Dolerus triplicatus[14], Dolerus ferrugatus[13], Dolerus uliginosus[9], Dolerus germanicus[1], Dolerus anticus[1], Dolerus madidus[1]						GMGRE1817-13	Diptera	Cecidomyiidae	Family	BOLD:ACQ8006	2			GMGRG1476-13	Diptera	Phoridae	Family	BOLD:ACJ3370
GMGMM727-14	Hymenoptera	Enytus montanus	Enytus montanus	Species	BOLD:ACP6229	8	Enytus apostatus[2], Enytus montanus[1]						GMGMB300-14	Diptera	Chironomidae	Family	BOLD:ACQ8502	8			GMGRG4378-13	Hymenoptera	Platygastridae	Family	BOLD:ACJ2521
GMGMK1087-14	Hymenoptera	Eucera longicornis	Eucera longicornis	Species	BOLD:ABZ4790	13	Eucera longicornis[12], Eucera sociabilis[1]						GMGMB204-14	Diptera	Chamaemyiidae	Family	BOLD:ACQ8503	4			GMGRH160-13	Hymenoptera	Braconidae	Family	BOLD:ACJ7893
GMGMA1507-14	Hymenoptera	Eucera nigrescens	Eucera nigrescens	Species	BOLD:ABZ2397	47	Eucera nigrescens[42], Eucera spurcatipes[4]						GMGMK1367-14	Diptera	Chloropidae	Family	BOLD:ACQ8508	48			GMGRH1228-13	Diptera	Cecidomyiidae	Family	BOLD:ACJ4980
GMGMH1533-14	Hymenoptera	Gelis bicolor	Gelis bicolor	Species	BOLD:ABU6676	8	Gelis bicolor[8], Gelis sp. AH1[1]						GMGMB1129-14	Diptera	Empididae	Family	BOLD:ACQ8518	6			GMGRH1422-13	Diptera	Cecidomyiidae	Family	BOLD:ACJ5536
GMGMG296-14	Hymenoptera	Glypta fumiferanae	Glypta fumiferanae	Species	BOLD:ACF5214	204	Glypta fumiferanae[121], Glypta sp.[13], Glypta ceratites[9], Glypta extincta[8], Glypta caudata[4], Glypta teres[1], Glypta fronticornis[1]						GMGMB1025-14	Diptera	Anthomyiidae	Family	BOLD:ACQ8522	9			GMGRH1607-13	Diptera	Cecidomyiidae	Family	BOLD:ACR7778
GMGMD491-14	Hymenoptera	Hedychrum gerstaeckeri	Hedychrum gerstaeckeri	Species	BOLD:AAM3758	25	Hedychrum gerstaeckeri[24], Hedychrum rutilans[1]						GMGMB881-14	Diptera	Lonchaeidae	Family	BOLD:ACQ8545	2			GMGRH1560-13	Diptera	Cecidomyiidae	Family	BOLD:ACJ4979
GMGML1223-14	Hymenoptera	Ichneumon spurius	Ichneumon spurius	Species	BOLD:AAI7602	8	Ichneumon spurius[5], Ichneumon pygolissus[1], Ichneumon marmotus[1]						GMGMB966-14	Diptera	Dolichopodidae	Family	BOLD:ACQ8551	6			GMGRH1545-13	Diptera	Cecidomyiidae	Family	BOLD:ACJ4927
GMGRF613-13	Hymenoptera	Itoplectis conquisitor	Itoplectis conquisitor	Species	BOLD:AAB1283	49	Itoplectis quadricingulata[7], Itoplectis conquisitor[3], Itoplectis aterrima[3], Itoplectis alternans[1], Itoplectis AB-1[1]						GMGMC1308-14	Diptera	Agromyzidae	Family	BOLD:ACQ8553	2			GMGRH2287-13	Diptera	Cecidomyiidae	Family	BOLD:ACJ7308
GMGMA704-14	Hymenoptera	Lasius mixtus	Lasius mixtus	Species	BOLD:AAE4952	9	Lasius mixtus[5], Lasius sabularum[1]						GMGMB968-14	Diptera	Sciaridae	Family	BOLD:ACQ8556	2			GMGRH2701-13	Diptera	Cecidomyiidae	Family	BOLD:ACJ5432
GMGMA1097-14	Hymenoptera	Lasius platythorax	Lasius platythorax	Species	BOLD:ABZ8339	32	Lasius platythorax[21], Lasius plathythorax[8], Lasius psammophilus[2], Lasius niger[1]						GMGMC1523-14	Diptera	Cecidomyiidae	Family	BOLD:ACQ8557	2			GMGRH562-13	Diptera	Cecidomyiidae	Family	BOLD:ACJ2652
GMGMM1058-14	Hymenoptera	Limerodops elongatus	Limerodops elongatus	Species	BOLD:AAE6338	18	Limerodops elongatus[9], Limerodops subsericans[8]						GMGMC1302-14	Diptera	Cecidomyiidae	Family	BOLD:ACQ8578	11			GMGRH2213-13	Diptera	Dixidae	Family	BOLD:ACJ5435
GMGME289-14	Hymenoptera	Macrophya annulata	Macrophya annulata	Species	BOLD:AAE7614	31	Macrophya annulata[29], Macrophya albannulata[1]						GMGMB109-14	Diptera	Cecidomyiidae	Family	BOLD:ACQ8599	3			GMGRH1799-13	Hymenoptera	Ichneumonidae	Family	BOLD:ACJ9319
GMGMI461-14	Hymenoptera	Megachile versicolor	Megachile versicolor	Species	BOLD:AAD5414	30	Megachile versicolor[29], Megachile versicolor subsp. versicolor[1]						GMGMB943-14	Diptera	Phoridae	Family	BOLD:ACQ8620	2			GMGRH2654-13	Hymenoptera	Ichneumonidae	Family	BOLD:ACJ7750
GMGMK432-14	Hymenoptera	Mesoleptus congener	Mesoleptus congener	Species	BOLD:AAH1690	69	Mesoleptus congener[2], Mesoleptus pronus[1], Mesoleptus laticinctus[1]						GMGMB1160-14	Diptera	Phoridae	Family	BOLD:ACQ8645	13			GMGRH076-13	Hymenoptera	Megaspilidae	Family	BOLD:ACJ7851
GMGMB1297-14	Hymenoptera	Myrmica sulcinodis	Myrmica sulcinodis	Species	BOLD:AAD4573	27	Myrmica sulcinodis[19], Myrmica xavieri[1]						GMGML866-14	Diptera	Agromyzidae	Family	BOLD:ACQ8695	3			GMGRH2063-13	Diptera	Mycetophilidae	Family	BOLD:ACJ6693
GMGMK1476-14	Hymenoptera	Ichneumonidae	NO TAXONOMY	Species	BOLD:ACG0221	4	Chorinaeus scrobipalpae[1], Chorinaeus funebris[1]						GMGMK1415-14	Diptera	Empididae	Family	BOLD:ACQ8704	50			GMGRH477-13	Diptera	Phoridae	Family	BOLD:ACJ3117
GMGML1522-14	Hymenoptera	Bombus	NO TAXONOMY	Species	BOLD:AAD2530	39	Bombus bohemicus[23], Bombus ashtoni[14], Bombus fernaldae[1]						GMGMJ1165-14	Diptera	Lonchaeidae	Family	BOLD:ACQ8743	12			GMGRH2226-13	Diptera	Phoridae	Family	BOLD:ACJ5572
GMGMN1312-14	Hymenoptera	Bombus	NO TAXONOMY	Species	BOLD:AAC4378	194	Bombus pascuorum[59], Bombus ITAspC[5], Bombus ITAspA[5], Bombus pascuorum subsp. vulgo[2], Bombus incertus[1], Bombus flavobarbatus[1]						GMGMB200-14	Diptera	Hybotidae	Family	BOLD:ACQ8753	6			GMGRH2626-13	Hymenoptera	Platygastridae	Family	BOLD:ACJ7557
GMGMB878-14	Hymenoptera	Dolichovespula	NO TAXONOMY	Species	BOLD:AAB6388	230	Dolichovespula maculata[200], Dolichovespula media[13]						GMGMA040-14	Diptera	Cecidomyiidae	Family	BOLD:ACQ8767	3			GMGRH1966-13	Coleoptera	Staphylinidae	Family	BOLD:ACJ5566
GMGML1193-14	Hymenoptera	Proclitus	NO TAXONOMY	Species	BOLD:AAH1774	55	Proclitus jft01[1], Proclitus JFT01[1]						GMGMK664-14	Diptera	Cecidomyiidae	Family	BOLD:ACQ8768	3			GMGRI765-13	Diptera	Cecidomyiidae	Family	BOLD:ACJ4898
GMGMJ121-14	Hymenoptera	Dinotrema	NO TAXONOMY	Species	BOLD:AAA7636	971	Dinotrema jft01[88], Dinotrema jft02[30], Dinotrema JFT01[1]						GMGML224-14	Diptera	Asilidae	Family	BOLD:ACQ8777	29			GMGRI052-13	Hemiptera	Cicadellidae	Family	BOLD:ACJ8817
GMGMN835-14	Hymenoptera	Polyblastus	NO TAXONOMY	Species	BOLD:ABZ2020	22	Polyblastus subalpinus[4], Polyblastus pedalis[2]						GMGMA896-14	Diptera	Cecidomyiidae	Family	BOLD:ACQ8803	3			GMGRI686-13	Hymenoptera	Diapriidae	Family	BOLD:ACJ8839
GMGMK409-14	Hymenoptera	Aleiodes	NO TAXONOMY	Species	BOLD:AAA7796	124	Aleiodes pictus[21], Aleiodes similis[16], Aleiodes borealis[14], Aleiodes pictus agg.[5], Aleiodes cf. similis[5], Aleiodes cf. borealis[5], Aleiodes nigricornis[4], Aleiodes cf. pictus[3], Aleiodes nr. borealis[2], Aleiodes mythimnae[2], Aleiodes cf. mythimnae[2], Aleiodes tenuis[1], Aleiodes gastritor[1], Aleiodes cf. crassipes[1], Aleiodes confusus[1], Aleiodes dispar[1], Aleiodes nr. boreali…						GMGMA1377-14	Diptera	Dolichopodidae	Family	BOLD:ACQ8807	9			GMGRI081-13	Hymenoptera	Ichneumonidae	Family	BOLD:ACJ7481
GMGMG1205-14	Hymenoptera	Ichneumonidae	NO TAXONOMY	Species	BOLD:ACC7954	18	Stenomacrus minutissimus[2], Stenomacrus sp. n[1]						GMGMC1596-14	Diptera	Cecidomyiidae	Family	BOLD:ACQ8812	2			GMGRI078-13	Coleoptera	Leiodidae	Family	BOLD:ACK2180
GMGMM1269-14	Hymenoptera	Microplitis	NO TAXONOMY	Species	BOLD:ACQ8706	38	Microplitis jft77[10], Microplitis varicolor[1]						GMGMC477-14	Diptera	Empididae	Family	BOLD:ACQ8875	12			GMGRI309-13	Diptera	Mycetophilidae	Family	BOLD:ACJ5307
GMGMA1470-14	Hymenoptera	Eupeodes	NO TAXONOMY	Species	BOLD:ABY9728	198	Eupeodes corollae[105], Eupeodes bucculatus[2]						GMGMA1432-14	Diptera	Cecidomyiidae	Family	BOLD:ACQ8906	2			GMGRI426-13	Diptera	Mycetophilidae	Family	BOLD:ACJ4960
GMGMI057-14	Hymenoptera	Agrothereutes	NO TAXONOMY	Species	BOLD:ACN8453	12	Agrothereutes abbreviatus[8], Agrothereutes mansuetor[1], Agrothereutes fumipennis[1]						GMGMC1129-14	Diptera	Cecidomyiidae	Family	BOLD:ACQ8936	2			GMGRB1452-13	Hymenoptera	Pteromalidae	Family	BOLD:ACF7406
GMGML1191-14	Hymenoptera	Trypoxylon	NO TAXONOMY	Species	BOLD:AAN3726	137	Trypoxylon clavicerum[55], Trypoxylon kostylevi[42]						GMGMB927-14	Diptera	Cecidomyiidae	Family	BOLD:ACQ8949	3			GMGRE2197-13	Hymenoptera	Scelioninae	Subfamily	BOLD:ACI2766
GMGMA485-14	Hymenoptera	Microgaster	NO TAXONOMY	Species	BOLD:ACE8790	98	Microgaster sp.[29], Microgaster jft10[20], Microgaster jft33[2], Microgaster jft02[1], Microgaster hospes[1]						GMGMC1067-14	Diptera	Limoniidae	Family	BOLD:ACQ8977	2			GMGRG2962-13	Diptera	Orthocladiinae	Subfamily	BOLD:ACJ3228
GMGMN872-14	Hymenoptera	Bombus	NO TAXONOMY	Species	BOLD:AAB1060	256	Bombus lucorum[179], Bombus lapidarius caucasicus[3], Bombus cryptarum[2], Bombus sp.[1]						GMGMA1274-14	Diptera	Cecidomyiidae	Family	BOLD:ACQ9003	3			GMGRC2935-13	Hemiptera	Illinoia	Genus	BOLD:ACI4635
GMGMB1368-14	Hymenoptera	Nomada	NO TAXONOMY	Species	BOLD:AAC8809	128	Nomada panzeri[46], Nomada leucophthalma[29], Nomada glabella[27], Nomada flava[12], Nomada ferruginata[9], Nomada flava_spec1CSE[4]						GMGMB1026-14	Diptera	Cecidomyiidae	Family	BOLD:ACQ9013	2			GMGRC2212-13	Hymenoptera	Microplitis	Genus	BOLD:ACG3315
GMGMA507-14	Hymenoptera	Pamphilius	NO TAXONOMY	Species	BOLD:AAF1967	22	Pamphilius hortorum[18], Pamphilius balteatus[2]						GMGML820-14	Diptera	Chironomidae	Family	BOLD:ACQ9036	3			GMGRC2927-13	Hemiptera	Phyllaphis	Genus	BOLD:ACI4744
GMGMF049-14	Hymenoptera	Tenthredopsis	NO TAXONOMY	Species	BOLD:AAD8992	108	Tenthredopsis nassata[28], Tenthredopsis litterata[20], Tenthredopsis scutellaris[19], Tenthredopsis sordida[10], Tenthredopsis friesei[7], Tenthredopsis sp.[2], Tenthredopsis ornata[2], Tenthredopsis coquebertii[2], Tenthredopsis 018 litterata M2[2], Tenthredopsis 020nr nassata GR[2], Tenthredopsis 014litt. v nigripes[1], Tenthredopsis 017 litterata M1[1], Tenthredopsis cf. scutellaris[1], Tenth…						GMGMC1068-14	Diptera	Agromyzidae	Family	BOLD:ACQ9099	2			GMGRD3236-13	Hymenoptera	Aprostocetus	Genus	BOLD:ACI4381
GMGMN843-14	Hymenoptera	Dusona	NO TAXONOMY	Species	BOLD:AAC9245	377	Dusona bicoloripes[12], Dusona sp.[7], Dusona stragifex[3], Dusona pugillator[2], Dusona bellipes[2]						GMGMK1366-14	Diptera	Oscinellinae	Family	BOLD:ACQ9152	18			GMGRD3633-13	Hymenoptera	Dusona	Genus	BOLD:ACI4041
GMGMG471-14	Hymenoptera	Trychosis	NO TAXONOMY	Species	BOLD:ACF3659	31	Trychosis legator[10], Trychosis sp.[5], Trychosis pauper[1]						GMGMB195-14	Diptera	Agromyzidae	Family	BOLD:ACQ9155	2			GMGRD3625-13	Hymenoptera	Exetastes	Genus	BOLD:ACI4142
GMGMK1058-14	Hymenoptera	Microplitis	NO TAXONOMY	Species	BOLD:AAA2408	488	Microplitis varicolor[404], Microplitis mediator[45]						GMGRD662-13	Diptera	Cecidomyiidae	Family	BOLD:ACQ9160	2			GMGRD093-13	Diptera	Megaselia	Genus	BOLD:ACG4368
GMGMA1239-14	Hymenoptera	Lasius	NO TAXONOMY	Species	BOLD:ABZ8330	129	Lasius niger[67], Lasius platythorax[4]						GMGMC1070-14	Diptera	Chironomidae	Family	BOLD:ACQ9190	6			GMGRD3409-13	Diptera	Molophilus	Genus	BOLD:ACG3410
GMGMJ608-14	Hymenoptera	Ischnus	NO TAXONOMY	Species	BOLD:AAG7737	282	Ischnus inquisitorius[223], Ischnus migrator[2]						GMGMC1522-14	Diptera	Cecidomyiidae	Family	BOLD:ACQ9217	3			GMGRD1397-13	Diptera	Pseudorthocladius	Genus	BOLD:ACG2966
GMGML173-14	Hymenoptera	Aphidius	NO TAXONOMY	Species	BOLD:ABZ3101	301	Aphidius rhopalosiphi[179], Aphidius tarsalis[1]						GMGML746-14	Diptera	Agromyzidae	Family	BOLD:ACQ9248	18			GMGRE3315-13	Hymenoptera	Anagrus	Genus	BOLD:ACI4759
GMGMH1523-14	Hymenoptera	Megastylus	NO TAXONOMY	Species	BOLD:ACG3907	24	Megastylus cruentator[5], Megastylus cruentaler[2]						GMGMB1015-14	Diptera	Dolichopodidae	Family	BOLD:ACQ9260	14			GMGRE3350-13	Hymenoptera	Pholetesor	Genus	BOLD:ACI4335
GMGRC1301-13	Hymenoptera	Lasius	NO TAXONOMY	Species	BOLD:AAE1554	35	Lasius umbratus[8], Lasius citrinus[5], Lasius sabularum[3], Lasius flavus[1]						GMGMA1314-14	Diptera	Sciaridae	Family	BOLD:ACQ9294	3			GMGRE1455-13	Hymenoptera	Campoplex	Genus	BOLD:ACR5519
GMGMG002-14	Hymenoptera	Platygaster	NO TAXONOMY	Species	BOLD:ACO4173	30	Platygaster gracilipes[6], Platygaster nisus[1]						GMGMB270-14	Diptera	Ceratopogonidae	Family	BOLD:ACQ9365	2			GMGRE3695-13	Diptera	Corynoptera	Genus	BOLD:ACI4344
GMGMJ895-14	Hymenoptera	Dinotrema	NO TAXONOMY	Species	BOLD:AAH2151	79	Dinotrema JFT1[21], Dinotrema JFT10[5]						GMGMB191-14	Diptera	Cecidomyiidae	Family	BOLD:ACQ9380	2			GMGRE1674-13	Hymenoptera	Diadegma	Genus	BOLD:ACG7703
GMGMA662-14	Hymenoptera	Mesochorus	NO TAXONOMY	Species	BOLD:AAG9511	133	Mesochorus n. sp.[19], Mesochorus agilis[8], Mesochorus punctipleuris[8], Mesochorus sp. AB-4[3], Mesochorus sp. AB 13[3], Mesochorus sp. MAS BIN269[2], Mesochorus sp.[1], Mesochorus angustatus[1]						GMGMN736-14	Diptera	Cecidomyiidae	Family	BOLD:ACQ9420	3			GMGRE3479-13	Hymenoptera	Dinotrema	Genus	BOLD:ACI4404
GMGMI659-14	Hymenoptera	Ichneumonidae	NO TAXONOMY	Species	BOLD:ACI8745	7	Aclastus transversalis[1], Aclastus gracilis[1]						GMGMJ1241-14	Diptera	Chamaemyiidae	Family	BOLD:ACQ9448	9			GMGRE3143-13	Coleoptera	Malthodes	Genus	BOLD:ACI4208
GMGMM750-14	Hymenoptera	Aphidius	NO TAXONOMY	Species	BOLD:AAJ1250	183	Aphidius uzbekistanicus[167], Aphidius avenaphis[5], Aphidius ervi[1]						GMGMC1502-14	Diptera	Agromyzidae	Family	BOLD:ACQ9490	3			GMGRF3048-13	Diptera	Bradysia	Genus	BOLD:ACI8128
GMGMN118-14	Hymenoptera	Orthizema	NO TAXONOMY	Species	BOLD:ABU6925	13	Orthizema triannulatum[10], Orthizema subannulata[1]						GMGMA043-14	Diptera	Cecidomyiidae	Family	BOLD:ACQ9496	3			GMGRF722-13	Diptera	Corynoneura	Genus	BOLD:ACI6306
GMGMB1383-14	Hymenoptera	Orthizema	NO TAXONOMY	Species	BOLD:ACJ7914	8	Orthizema triannulatum[1], Orthizema subannulata[1], Orthizema hadrocerum[1]						GMGMB178-14	Diptera	Cecidomyiidae	Family	BOLD:ACQ9519	7			GMGRF3923-13	Diptera	Corynoptera	Genus	BOLD:ACI8199
GMGRB1370-13	Hymenoptera	Ichneumonidae	NO TAXONOMY	Species	BOLD:ACJ7894	9	Gnathochorisis dentifer[5], Gnathochorisis crassulus[1]						GMGMA016-14	Diptera	Chloropidae	Family	BOLD:ACQ9537	2			GMGRF1492-13	#N/A	Corynoptera	Genus	BOLD:ACX0359
GMGMH1487-14	Hymenoptera	Bathythrix	NO TAXONOMY	Species	BOLD:AAW2805	15	Bathythrix lamina[3], Bathythrix laminata[2]						GMGMC1156-14	Diptera	Cecidomyiidae	Family	BOLD:ACQ9599	2			GMGRF5242-13	Diptera	Corynoptera	Genus	BOLD:ACI9131
GMGMB530-14	Hymenoptera	Aphidius	NO TAXONOMY	Species	BOLD:ACI1385	49	Aphidius funebris[21], Aphidius matricariae[2]						GMGMB176-14	Diptera	Cecidomyiidae	Family	BOLD:ACQ9629	1			GMGRF4578-13	Hymenoptera	Diadegma	Genus	BOLD:ACI8961
GMGMA1062-14	Hymenoptera	Microgaster	NO TAXONOMY	Species	BOLD:AAV2167	53	Microgaster subcompletus[43], Microgaster subcompleta[1]						GMGMC1113-14	Diptera	Agromyzidae	Family	BOLD:ACQ9630	3			GMGRF454-13	Diptera	Megaselia	Genus	BOLD:ACH9331
GMGMK177-14	Hymenoptera	Trychosis	NO TAXONOMY	Species	BOLD:AAZ0242	12	Trychosis tristator[9], Trychosis ingrata[1]						GMGMA026-14	Diptera	Cecidomyiidae	Family	BOLD:ACQ9635	2			GMGRF6249-13	Hymenoptera	Noserus	Genus	BOLD:ACJ1038
GMGRE778-13	Hymenoptera	Coelichneumon	NO TAXONOMY	Species	BOLD:AAI4109	29	Coelichneumon comitator[3], Coelichneumon sp.[2], Coelichneumon impressor[1]						GMGMA076-14	Diptera	Phoridae	Family	BOLD:ACQ9655	6			GMGRF5516-13	Sarcoptiformes	Pergalumna	Genus	BOLD:ACJ5489
GMGRD1888-13	Hymenoptera	Andrena	NO TAXONOMY	Species	BOLD:AAJ2115	50	Andrena propinqua[21], Andrena dorsata[17]						GMGMI1304-14	Diptera	Psychodidae	Family	BOLD:ACQ9688	7			GMGRG4368-13	Hymenoptera	Aprostocetus	Genus	BOLD:ACJ2663
GMGMD183-14	Hymenoptera	Arge	NO TAXONOMY	Species	BOLD:AAE6147	31	Arge melanochra[13], Arge cyanocrocea[8], Arge melanochroa[4], Arge cingulata[3]						GMGMB222-14	Diptera	Agromyzidae	Family	BOLD:ACQ9789	2			GMGRG3067-13	Diptera	Asteromyia	Genus	BOLD:ACJ3015
GMGRC2908-13	Hymenoptera	Ichneumon	NO TAXONOMY	Species	BOLD:ABZ8256	28	Ichneumon albiger[9], Ichneumon molitorius[8], Ichneumon confusor[5], Ichneumon melanotis[3], Ichneumon ligatorius[1], Ichneumon minutorius[1]						GMGMK1380-14	Diptera	Hybotidae	Family	BOLD:ACQ9817	9			GMGRG2850-13	Diptera	Corynoptera	Genus	BOLD:ACJ3274
GMGME1098-14	Hymenoptera	Nomada	NO TAXONOMY	Species	BOLD:AAP1578	18	Nomada minuscula[17], Nomada sheppardana[1], Nomada flavoguttata[1]						GMGMA1577-14	Diptera	Hybotidae	Family	BOLD:ACQ9829	3			GMGRG3169-13	Diptera	Corynoptera	Genus	BOLD:ACJ3183
GMGMH886-14	Hymenoptera	Hylaeus	NO TAXONOMY	Species	BOLD:ABU9205	13	Hylaeus incongruus[6], Hylaeus gibbus[1]						GMGMC809-14	Diptera	Oscinellinae	Family	BOLD:ACQ9867	13			GMGRG4176-13	Hymenoptera	Dinotrema	Genus	BOLD:ACK6963
GMGML1016-14	Hymenoptera	Sphecodes	NO TAXONOMY	Species	BOLD:AAD0331	52	Sphecodes ferruginatus[38], Sphecodes hyalinatus[17]						GMGMC488-14	Diptera	Cecidomyiidae	Family	BOLD:ACQ9963	7			GMGRG590-13	Diptera	Lycoriella	Genus	BOLD:ACJ0498
GMGMH1591-14	Hymenoptera	Hylaeus	NO TAXONOMY	Species	BOLD:AAF4022	37	Hylaeus dilatatus[28], Hylaeus SRB1[1], Hylaeus annularis[1]						GMGMD832-14	Diptera	Phoridae	Family	BOLD:ACQ9989	4			GMGRH085-13	Hymenoptera	Aprostocetus	Genus	BOLD:ACJ7899
GMGRG4896-13	Hymenoptera	Diadegma	NO TAXONOMY	Species	BOLD:ACL8590	13	Diadegma sordipes[2], Diadegma semiclausum[1]						GMGMC1217-14	Diptera	Drosophilidae	Family	BOLD:ACQ9994	2			GMGRH1609-13	Diptera	Corynoptera	Genus	BOLD:ACJ5223
GMGMI445-14	Hymenoptera	Anteon	NO TAXONOMY	Species	BOLD:AAU9508	30	Anteon pubicorne[13], Anteon tenuicorne[8]						GMGMC1299-14	Diptera	Lauxaniidae	Family	BOLD:ACR0052	2			GMGRH2358-13	Diptera	Corynoptera	Genus	BOLD:ACJ5436
GMGRE2281-13	Hymenoptera	Protapanteles	NO TAXONOMY	Species	BOLD:AAA7151	21	Protapanteles sp.[9], Protapanteles immunis[4]						GMGMD1596-14	Diptera	Cecidomyiidae	Family	BOLD:ACR0160	5			GMGRH2576-13	Hymenoptera	Leptasis	Genus	BOLD:ACQ6853
GMGME399-14	Hymenoptera	Hylaeus	NO TAXONOMY	Species	BOLD:AAI8775	30	Hylaeus gredleri[19], Hylaeus intermedius[3], Hylaeus ITAF04[1]						GMGMC1543-14	Diptera	Cecidomyiidae	Family	BOLD:ACR0193	2			GMGRI521-13	Diptera	Megaselia	Genus	BOLD:ACJ5220
GMGMA444-14	Hymenoptera	Chrysis	NO TAXONOMY	Species	BOLD:ABY5626	60	Chrysis ignita form A[17], Chrysis terminata[16], Chrysis ignita[13], Chrysis leptomandibularis[2]						GMGMD073-14	Diptera	Rhinophoridae	Family	BOLD:ACR0262	4			GMGRC1705-13	Diptera	Trichosia edwardsi	Species	BOLD:ACF6248
GMGMK343-14	Hymenoptera	Cladius	NO TAXONOMY	Species	BOLD:AAE2748	47	Cladius pectinicornis[37], Cladius compressicornis[1]						GMGMD912-14	Diptera	Chironominae	Family	BOLD:ACR0263	5			GMGRC2109-13	Diptera	Trichosia edwardsi	Species	BOLD:ACF6942
GMGMH1412-14	Hymenoptera	Xorides	NO TAXONOMY	Species	BOLD:AAO0228	19	Xorides securicornis[6], Xorides gravenhorstii[1]						GMGMI748-14	Diptera	Chironomidae	Family	BOLD:ACR0361	5			GMGRC2613-13	Diptera	Trichosia edwardsi	Species	BOLD:ACG3537
GMGRE1463-13	Hymenoptera	Cotesia	NO TAXONOMY	Species	BOLD:AAA9386	588	Cotesia xylina[58], Cotesia tibialis[3], Cotesia sp.[3], Cotesia jft61[2]						GMGMD821-14	Diptera	Cecidomyiidae	Family	BOLD:ACR0363	6			GMGRC2090-13	Diptera	Trichosia scotica	Species	BOLD:ACR9631
GMGML680-14	Hymenoptera	Diadegma	NO TAXONOMY	Species	BOLD:AAE7569	11	Diadegma fenestrale[4], Diadegma nanus[1]						GMGMB1566-14	Diptera	Chironomidae	Family	BOLD:ACR0396	2			GMGRD1661-13	Diptera	Axysta cesta	Species	BOLD:ACS0447
GMGMI419-14	Hymenoptera	Mesochorus	NO TAXONOMY	Species	BOLD:ACE0798	10	Mesochorus mellis[1], Mesochorus cimbicis[1]						GMGMD697-14	Diptera	Sciaridae	Family	BOLD:ACR0436	2			GMGRD3285-13	Diptera	Paracladopelma camptolabis	Species	BOLD:ACG6668
GMGMK437-14	Hymenoptera	Ichneumon	NO TAXONOMY	Species	BOLD:ACE3182	66	Ichneumon simulans[29], Ichneumon latrator[5], Ichneumon oblongus[3], Ichneumon picticollis[1], Ichneumon memorator[1], Ichneumon elegans[1], Ichneumon delator[1], Ichneumon obliteratus[1]						GMGMJ1225-14	Diptera	Agromyzidae	Family	BOLD:ACR0495	5			GMGRD1318-13	Diptera	Paracladopelma mikianum	Species	BOLD:ACG4027
GMGMA691-14	Hymenoptera	Cratichneumon	NO TAXONOMY	Species	BOLD:AAI9043	10	Cratichneumon fabricator[4], Cratichneumon flavifrons[3], Cratichneumon viator[1], Cratichneumon infidus[1]						GMGMD679-14	Diptera	Agromyzidae	Family	BOLD:ACR0566	3			GMGRF2486-13	Diptera	Corynoptera blanda	Species	BOLD:ACI5475
GMGRF3418-13	Hymenoptera	Cladius	NO TAXONOMY	Species	BOLD:AAE2747	27	Cladius ordubadensis[14], Cladius pectinicornis[8], Cladius difformis[1]						GMGMD754-14	Diptera	Cecidomyiidae	Family	BOLD:ACR0608	4			GMGRF1166-13	Diptera	Paratrichocladius nivalis	Species	BOLD:ACK7136
GMGME203-14	Hymenoptera	Ephedrus	NO TAXONOMY	Species	BOLD:AAL0670	79	Ephedrus plagiator[16], Ephedrus blattnyi[1]						GMGMC1207-14	Diptera	Chironominae	Family	BOLD:ACR0670	2			GMGRF5763-13	Diptera	Trichosia edwardsi	Species	BOLD:ACJ0681
GMGMN1213-14	Hymenoptera	Lysiphlebus	NO TAXONOMY	Species	BOLD:AAH7398	119	Lysiphlebus fabarum[47], Lysiphlebus aff. fabarum[31], Lysiphlebus cardui[11], Lysiphlebus confusus[11]						GMGMD743-14	Diptera	Ceratopogonidae	Family	BOLD:ACR0676	6			GMGRH282-13	Diptera	Corynoptera blanda	Species	BOLD:ACJ2632
GMGMM1270-14	Hymenoptera	Phygadeuon	NO TAXONOMY	Species	BOLD:ABV1041	6	Phygadeuon trichops[1], Phygadeuon fumator[1]						GMGMM655-14	Diptera	Cecidomyiidae	Family	BOLD:ACR0694	2			GMGRH2003-13	Symphypleona	Dicyrtomina minuta	Species	BOLD:ACQ0381
GMGMA1463-14	Hymenoptera	Chrestosema	NO TAXONOMY	Species	BOLD:ACP6982	3	Chrestosema eurytrypum[1], Chrestosema erythropum[1]						GMGMC1484-14	Diptera	Chironomidae	Family	BOLD:ACR0701	2			GMGRH1601-13	Diptera	Limnophyes sp. 9SW	Species	BOLD:ACJ4977
GMGMG005-14	Hymenoptera	Phygadeuon	NO TAXONOMY	Species	BOLD:ACL9002	4	Phygadeuon troglodytes[1], Phygadeuon curviscapus[1]						GMGMC525-14	Diptera	Sciaridae	Family	BOLD:ACR0702	3
GMGMB1575-14	Hymenoptera	Omalus	NO TAXONOMY	Species	BOLD:ACC4462	11	Omalus puncticollis[8], Omalus aeneus[1]						GMGMB710-14	Diptera	Anthomyiidae	Family	BOLD:ACR0704	3
GMGML1242-14	Hymenoptera	Enicospilus	NO TAXONOMY	Species	BOLD:AAI5161	16	Enicospilus ramidulus[8], Enicospilus merdarius[1]						GMGMD1239-14	Diptera	Lauxaniidae	Family	BOLD:ACR0753	12
GMGMI604-14	Hymenoptera	Ancistrocerus	NO TAXONOMY	Species	BOLD:AAM3899	40	Ancistrocerus nigricornis[29], Ancistrocerus trifasciatus[1]						GMGMC1288-14	Diptera	Lauxaniidae	Family	BOLD:ACR0762	2
GMGRC1282-13	Hymenoptera	Andrena	NO TAXONOMY	Species	BOLD:AAE4947	34	Andrena minutuloides[32], Andrena sp. A[1]						GMGMC321-14	Diptera	Cecidomyiidae	Family	BOLD:ACR0763	2
GMGMC897-14	Hymenoptera	Formica	NO TAXONOMY	Species	BOLD:AAE1002	119	Formica japonica[19], Formica rufibarbis[18], Formica subpolita[8], Formica hayashi[5], Formica nr. clara[5], Formica cunicularia[4], Formica sibylla_cf[3], Formica neorufibarbis_1[3], Formica indet[2], Formica clara[2], Formica sinae[1], Formica sibylla[1], Formica argentea[1], Formica aserva[1]						GMGMD632-14	Diptera	Keroplatidae	Family	BOLD:ACR0793	2
GMGMF1532-14	Hymenoptera	Pimpla	NO TAXONOMY	Species	BOLD:AAH9349	18	Pimpla contemplator[7], Pimpla melanacrias[1]						GMGMC1454-14	Diptera	Chironomidae	Family	BOLD:ACR0830	2
GMGMJ1255-14	Hymenoptera	Aptesis	NO TAXONOMY	Species	BOLD:ACC4370	49	Aptesis jejunator[1], Aptesis improba[1], Aptesis assimilis[1]						GMGMC1190-14	Diptera	Agromyzidae	Family	BOLD:ACR0837	2
GMGML038-14	Hymenoptera	Syrphoctonus	NO TAXONOMY	Species	BOLD:AAK1321	20	Syrphoctonus tarsatorius[11], Syrphoctonus cf. tarsatorius[1]						GMGMC480-14	Diptera	Agromyzidae	Family	BOLD:ACR0844	4
GMGMK338-14	Hymenoptera	Myrmica	NO TAXONOMY	Species	BOLD:ACF5064	5	Myrmica specioides[2], Myrmica scabrinodis[1]						GMGMD155-14	Diptera	Agromyzidae	Family	BOLD:ACR0856	2
GMGMC1022-14	Hymenoptera	Halictus	NO TAXONOMY	Species	BOLD:AAD5869	114	Halictus simplex[22], Halictus langobardicus[21], Halictus sp.[15], Halictus eurygnathus[8], Halictus compressus[7], Halictus affeurygnathus[2], Halictus RUS03[1]						GMGMD658-14	Diptera	Chironomidae	Family	BOLD:ACR0876	18
GMGRF4511-13	Hymenoptera	Colletes	NO TAXONOMY	Species	BOLD:AAB7299	44	Colletes halophilus[17], Colletes succinctus[13], Colletes hederae[9], Colletes brevigena[1], Colletes sp. NHM AD102[1], Colletes intricans[1]						GMGMD896-14	Diptera	Ceratopogonidae	Family	BOLD:ACR0904	2
GMGMH1518-14	Hymenoptera	Diadegma	NO TAXONOMY	Species	BOLD:ACR3912	6	Diadegma laterale[2], Diadegma fenestrale[1]						GMGMI693-14	Diptera	Psilidae	Family	BOLD:ACR1090	7
GMGMD021-14	Hymenoptera	Tenthredo	NO TAXONOMY	Species	BOLD:ABV4518	10	Tenthredo maculata[5], Tenthredo vespiformis[1], Tenthredo silensis[1], Tenthredo diana[1]						GMGMI1284-14	Diptera	Chironomidae	Family	BOLD:ACR1218	40
GMGMN1517-14	Hymenoptera	Andrena	NO TAXONOMY	Species	BOLD:AAC8068	35	Andrena nigroaenea[34], Andrena nigroaenea subsp. nigroaenea[2], Andrena bicolor[1]						GMGMD1242-14	Diptera	Lauxaniidae	Family	BOLD:ACR1266	8
GMGRD3627-13	Hymenoptera	Macrophya	NO TAXONOMY	Species	BOLD:AAK6376	15	Macrophya militaris[10], Macrophya annulata[1]						GMGMJ724-14	Diptera	Heleomyzidae	Family	BOLD:ACR1339	47
GMGMM1056-14	Hymenoptera	Ichneumon	NO TAXONOMY	Species	BOLD:AAE2757	27	Ichneumon stramentor[7], Ichneumon confusor[5], Ichneumon crassifemur[4], Ichneumon ligatorius[2], Ichneumon suspiciosus[1], Ichneumon extensorius[1], Ichneumon albiger[1]						GMGMM642-14	Diptera	Cecidomyiidae	Family	BOLD:ACR1376	143
GMGMI1067-14	Hymenoptera	Macrophya	NO TAXONOMY	Species	BOLD:AAN9573	71	Macrophya albicincta[20], Macrophya carinthiaca[1]						GMGMI1311-14	Diptera	Drosophilidae	Family	BOLD:ACR1397	12
GMGMN632-14	Hymenoptera	Macrophya	NO TAXONOMY	Species	BOLD:AAF5611	31	Macrophya blanda[15], Macrophya oedipus[3]						GMGMI551-14	Diptera	Empididae	Family	BOLD:ACR1514	35
GMGML1537-14	Hymenoptera	Ichneumon	NO TAXONOMY	Species	BOLD:AAN3142	5	Ichneumon crassifemur[2], Ichneumon haemorrhoicus[1]						GMGMI558-14	Diptera	Empididae	Family	BOLD:ACR2038	1
GMGMJ032-14	Hymenoptera	Tenthredo	NO TAXONOMY	Species	BOLD:AAH9767	64	Tenthredo atra[27], Tenthredo moniliata[10], Tenthredo rubricoxis[4], Tenthredo ventricosa[4], Tenthredo piceocincta[3], Tenthredo ignobilis[3], Tenthredo cf. atra[1], Tenthredo granatensis[1]						GMGMN448-14	Diptera	Cecidomyiidae	Family	BOLD:ACR2043	5
GMGMA1019-14	Hymenoptera	Cephus	NO TAXONOMY	Species	BOLD:AAE9753	15	Cephus spinipes[9], Cephus lateralis[1]						GMGML871-14	Diptera	Agromyzidae	Family	BOLD:ACR2088	11
GMGML1217-14	Hymenoptera	Endasys	NO TAXONOMY	Species	BOLD:ACL7253	3	Endasys brevis[1], Endasys analis[1]						GMGMJ1194-14	Diptera	Empididae	Family	BOLD:ACR2194	2
GMGMI413-14	Hymenoptera	Dichrogaster	NO TAXONOMY	Species	BOLD:ACG8277	10	Dichrogaster aestivalis[4], Dichrogaster perlae[2]						GMGMI1196-14	Diptera	Cecidomyiidae	Family	BOLD:ACR2287	4
GMGMA732-14	Hymenoptera	Macrophya	NO TAXONOMY	Species	BOLD:AAJ1450	30	Macrophya sanguinolenta[22], Macrophya poecilopus[1]						GMGMK1304-14	Diptera	Agromyzidae	Family	BOLD:ACR2331	2
GMGRC2889-13	Hymenoptera	Lasioglossum	NO TAXONOMY	Species	BOLD:AAB2949	20	Lasioglossum parvulum[14], Lasioglossum pygmaeum[1], Lasioglossum nitidiusculum[1]						GMGMK1420-14	Diptera	Psychodidae	Family	BOLD:ACR2332	2
GMGMJ1247-14	Hymenoptera	Dolerus	NO TAXONOMY	Species	BOLD:AAD9939	62	Dolerus aeneus[32], Dolerus varispinus[2]						GMGML1310-14	Diptera	Cecidomyiidae	Family	BOLD:ACR2438	3
GMGRF6309-13	Hymenoptera	Enizemum	NO TAXONOMY	Species	BOLD:AAI7633	27	Enizemum ornatum[17], Enizemum cf. ornatum[5]						GMGMK1280-14	Diptera	Psychodidae	Family	BOLD:ACR2528	2
GMGMK345-14	Hymenoptera	Dolerus	NO TAXONOMY	Species	BOLD:AAZ6250	9	Dolerus fumosus[5], Dolerus sanguinicollis[2], Dolerus noblecourti[1]						GMGMN377-14	Diptera	Chironomidae	Family	BOLD:ACR2744	14
GMGMM1318-14	Hymenoptera	Olesicampe	NO TAXONOMY	Species	BOLD:ACL8330	9	Olesicampe vetula[1], Olesicampe annulitarsis[1]						GMGML574-14	Diptera	Phoridae	Family	BOLD:ACR2818	3
GMGMJ085-14	Hymenoptera	Mesochorus	NO TAXONOMY	Species	BOLD:ACE0858	11	Mesochorus fuscicornis[2], Mesochorus olerum[1], Mesochorus gemellus[1]						GMGML567-14	Diptera	Cecidomyiidae	Family	BOLD:ACR2903	3
GMGMI464-14	Hymenoptera	Athalia	NO TAXONOMY	Species	BOLD:AAC0157	75	Athalia circularis[23], Athalia circularis circularis[14], Athalia liberta[2], Athalia cordata[1]						GMGMK1391-14	Diptera	Cecidomyiidae	Family	BOLD:ACR2981	2
GMGRA1365-13	Hymenoptera	Schizopyga	NO TAXONOMY	Species	BOLD:AAO0097	19	Schizopyga circulator[11], Schizopyga frigida[3]						GMGMI703-14	Diptera	Hybotidae	Family	BOLD:ACR3121	4
GMGRC2976-13	Hymenoptera	Pimpla	NO TAXONOMY	Species	BOLD:ABU9166	54	Pimpla insignatoria[8], Pimpla flavicoxis[8]						GMGMJ929-14	Diptera	Heleomyzidae	Family	BOLD:ACR3123	11
GMGMK467-14	Hymenoptera	Diadegma	NO TAXONOMY	Species	BOLD:ACG0464	17	Diadegma tenuipes[1], Diadegma fenestrale[1]						GMGMK1396-14	Diptera	Cecidomyiidae	Family	BOLD:ACR3154	2
GMGRF4507-13	Hymenoptera	Empria	NO TAXONOMY	Species	BOLD:ABU6650	37	Empria sexpunctata[19], Empria sexmaculata[1], Empria liturata[1]						GMGMI353-14	Diptera	Limoniidae	Family	BOLD:ACR3244	3
GMGMK250-14	Hymenoptera	Mesochorus	NO TAXONOMY	Species	BOLD:AAF0483	138	Mesochorus sp. AB 15[4], Mesochorus sp. AB7[3], Mesochorus sp. MAS BIN542[2], Mesochorus sp. mas BIN542[2], Mesochorus sp. AB 7[1], Mesochorus olerum[1], Mesochorus sp. AB 10[1], Mesochorus sp. AB 11[1], Mesochorus sp.[1]						GMGMN386-14	Diptera	Cecidomyiidae	Family	BOLD:ACR3253	3
GMGMA1035-14	Hymenoptera	Allantus	NO TAXONOMY	Species	BOLD:AAJ3604	27	Allantus cingulatus[11], Allantus cingillum[5], Allantus 002 nr. cingulatus Iran[1]						GMGMI708-14	Diptera	Cecidomyiidae	Family	BOLD:ACR3272	3
GMGME087-14	Hymenoptera	Rhogogaster	NO TAXONOMY	Species	BOLD:AAC9550	106	Rhogogaster viridis[73], Rhogogaster chlorosoma[22], Rhogogaster scalaris[4], Rhogogaster sp. tM4[1]						GMGMJ1161-14	Diptera	Sphaeroceridae	Family	BOLD:ACR3408	31
GMGRD237-13	Hymenoptera	Megachile	NO TAXONOMY	Species	BOLD:AAA8356	45	Megachile centuncularis[45], Megachile relativa[2], Megachile versicolor[1]						GMGMK1434-14	Diptera	Cecidomyiidae	Family	BOLD:ACR3524	17
GMGMC030-14	Hymenoptera	Tenthredo	NO TAXONOMY	Species	BOLD:AAE4133	48	Tenthredo zonula[44], Tenthredo bizonula[1]						GMGMJ1162-14	Diptera	Hybotidae	Family	BOLD:ACR3568	15
GMGMH1425-14	Hymenoptera	Osmia	NO TAXONOMY	Species	BOLD:AAD6282	35	Osmia bicornis[22], Osmia rufa[3], Osmia pedicornis[1]						GMGMJ750-14	Diptera	Stratiomyidae	Family	BOLD:ACR3667	13
GMGRA1673-13	Hymenoptera	Anthidium	NO TAXONOMY	Species	BOLD:AAA9946	86	Anthidium manicatum[89], Anthidium manicatum subsp. nigrithorax[2], Anthidium SNP1[1]						GMGML862-14	Diptera	Agromyzidae	Family	BOLD:ACR3668	2
GMGMD1029-14	Hymenoptera	Pristiphora	NO TAXONOMY	Species	BOLD:AAQ2302	30	Pristiphora armata[10], Pristiphora leucopus[6], Pristiphora melanocarpa[2], Pristiphora ruficornis[1]						GMGMM637-14	Diptera	Chironomidae	Family	BOLD:ACR3672	7
GMGME201-14	Hymenoptera	Diadegma	NO TAXONOMY	Species	BOLD:AAI9475	7	Diadegma armillata[2], Diadegma armillatum[1]						GMGMI1252-14	Diptera	Cecidomyiidae	Family	BOLD:ACR3684	13
GMGMH1155-14	Hymenoptera	Phaeogenes	NO TAXONOMY	Species	BOLD:ACJ7476	17	Phaeogenes heterogonus[5], Phaeogenes planifrons[3], Phaeogenes semivulpinus[1]						GMGMI1020-14	Diptera	Empididae	Family	BOLD:ACR3693	16
GMGMK239-14	Hymenoptera	Pemphredon	NO TAXONOMY	Species	BOLD:AAG7873	52	Pemphredon lethifer[25], Pemphredon littoralis[15], Pemphredon inornata[1]						GMGMI1049-14	Diptera	Milichiidae	Family	BOLD:ACR3709	5
GMGRB2059-13	Hymenoptera	Trypoxylon	NO TAXONOMY	Species	BOLD:AAN3383	47	Trypoxylon attenuatum[20], Trypoxylon deceptorium[6]						GMGMC1145-14	Diptera	Agromyzidae	Family	BOLD:ACR3736	8
GMGMH630-14	Hymenoptera	Aphidius	NO TAXONOMY	Species	BOLD:AAG8013	29	Aphidius avenae[8], Aphidius picipes[3]						GMGMI1515-14	Diptera	Cecidomyiidae	Family	BOLD:ACR3819	40
GMGMM413-14	Hymenoptera	Lasioglossum	NO TAXONOMY	Species	BOLD:AAD9335	93	Lasioglossum morio[26], Lasioglossum UKR07[1], Lasioglossum UKR05[1], Lasioglossum UKR02[1], Lasioglossum UKR01[1]						GMGMD1595-14	Diptera	Muscidae	Family	BOLD:ACR3887	3
GMGMA503-14	Hymenoptera	Microplitis	NO TAXONOMY	Species	BOLD:AAA3092	43	Microplitis jft111[4], Microplitis fraudulentus[2], Microplitis xanthopus[1], Microplitis eremitus[1], Microplitis jft112[1]						GMGMK1411-14	Diptera	Chironomidae	Family	BOLD:ACR3994	64
GMGMA1519-14	Hymenoptera	Eutomostethus	NO TAXONOMY	Species	BOLD:AAJ0494	52	Eutomostethus ephippium[23], Eutomostethus ephippium ephippium[9], Eutomostethus nigrans[4]						GMGMM1592-14	Diptera	Anthomyiidae	Family	BOLD:ACR4031	1
GMGMD178-14	Hymenoptera	Lasioglossum	NO TAXONOMY	Species	BOLD:ACR3950	231	Lasioglossum politum[24], Lasioglossum affpolitum[7], Lasioglossum UKR07[2], Lasioglossum UKR08[1], Lasioglossum UKR05[1], Lasioglossum ITAE01[1]						GMGMC316-14	Diptera	Chironomidae	Family	BOLD:ACR4053	7
GMGMJ883-14	Hymenoptera	Aphidius	NO TAXONOMY	Species	BOLD:ACF4786	192	Aphidius rhopalosiphi[30], Aphidius matricariae[11], Aphidius urticae[2]						GMGML555-14	Diptera	Cecidomyiidae	Family	BOLD:ACR4095	5
GMGMC703-14	Hymenoptera	Lasioglossum	NO TAXONOMY	Species	BOLD:AAE1160	147	Lasioglossum pauxillum[14], Lasioglossum fulvicorne[1]						GMGMB1014-14	Diptera	Phoridae	Family	BOLD:ACR4289	36
GMGMK726-14	Hymenoptera	Cosmoconus	NO TAXONOMY	Species	BOLD:ACC0694	16	Cosmoconus elongator[6], Cosmoconus nigriventris[1]						GMGML823-14	Diptera	Agromyzidae	Family	BOLD:ACR4305	2
GMGMA139-14	Hymenoptera	Allantus	NO TAXONOMY	Species	BOLD:ABU8177	8	Allantus didymus didymus[3], Allantus laticinctus[1], Allantus didymus[1]						GMGMD710-14	Diptera	Cecidomyiidae	Family	BOLD:ACR4376	7
GMGRE3109-13	Hymenoptera	Mesoleptidea	NO TAXONOMY	Species	BOLD:AAG9608	40	Mesoleptidea cingulata[9], Mesoleptidea stalii[1]						GMGMD1587-14	Diptera	Cecidomyiidae	Family	BOLD:ACR4389	5
GMGMI1414-14	Hymenoptera	Metopius	NO TAXONOMY	Species	BOLD:ABU8842	13	Metopius fuscipennis[8], Metopius scrobiculatus[3]						GMGMB1300-14	Diptera	Sciaridae	Family	BOLD:ACR4409	85
GMGMM683-14	Hymenoptera	Ichneumon	NO TAXONOMY	Species	BOLD:AAF2941	16	Ichneumon suspiciosus[3], Ichneumon bucculentus[1]						GMGMK601-14	Diptera	Cecidomyiidae	Family	BOLD:ACR4415	3
GMGRF3309-13	Hymenoptera	Megachile	NO TAXONOMY	Species	BOLD:AAD7803	20	Megachile pilidens[17], Megachile ITA02[2]						GMGML738-14	Diptera	Empididae	Family	BOLD:ACR4429	4
GMGMI1430-14	Hymenoptera	Halictus	NO TAXONOMY	Species	BOLD:AAN4492	19	Halictus scabiosae[13], Halictus SPN1[2]						GMGMD1327-14	Diptera	Cecidomyiidae	Family	BOLD:ACR4496	15
GMGMI467-14	Hymenoptera	Andrena	NO TAXONOMY	Species	BOLD:AAD2472	37	Andrena carantonica[22], Andrena spinigera[10], Andrena scotica[3], Andrena trimmerana[1]						GMGMN412-14	Diptera	Lauxaniidae	Family	BOLD:ACR4960	23
GMGMH873-14	Hymenoptera	Hylaeus	NO TAXONOMY	Species	BOLD:AAE5078	22	Hylaeus brevicornis[13], Hylaeus ITA04[2], Hylaeus UKR02[1], Hylaeus ITAF05[1], Hylaeus ITA06[1], Hylaeus glacialis[1], Hylaeus ITA01[1]						GMGML1362-14	Diptera	Limoniidae	Family	BOLD:ACR5044	2
GMGMN561-14	Hymenoptera	Cotesia	NO TAXONOMY	Species	BOLD:AAV2166	12	Cotesia specularis[3], Cotesia sp. specularis[1], Cotesia maculithorax[1], Cotesia cf. specularis[1]						GMGMM681-14	Diptera	Medeterinae	Family	BOLD:ACR5525	2
GMGMA990-14	Hymenoptera	Ceratina	NO TAXONOMY	Species	BOLD:AAE9812	34	Ceratina cyanea[26], Ceratina mocsaryi[1], Ceratina ITA01[1]						GMGMN1046-14	Diptera	Lonchaeidae	Family	BOLD:ACR6020	4
GMGMB637-14	Hymenoptera	Campoletis	NO TAXONOMY	Species	BOLD:AAZ9681	11	Campoletis latrator[1], Campoletis ensator[1]						GMGMN1058-14	Diptera	Lauxaniidae	Family	BOLD:ACR6164	10
GMGMB1403-14	Hymenoptera	Mesoleptus	NO TAXONOMY	Species	BOLD:ACF8838	15	Mesoleptus tobiasi[1], Mesoleptus incessor[1]						GMGRD1088-13	Diptera	Cecidomyiidae	Family	BOLD:ACT4702	33
GMGMM450-14	Hymenoptera	Gelis	NO TAXONOMY	Species	BOLD:ABU6671	30	Gelis rufogaster[15], Gelis cf. rufogaster[3], Gelis trux[2], Gelis bicolor[1]						GMGRD2641-13	Diptera	Cecidomyiidae	Family	BOLD:ACW3113	4
GMGME287-14	Hymenoptera	Bombus	NO TAXONOMY	Species	BOLD:AAD8184	25	Bombus rupestris[21], Bombus MNG1[1]						GMGRB2058-13	Entomobryomorpha	Entomobryidae	Family	BOLD:ACF7012	7
GMGMF1073-14	Hymenoptera	Dolichovespula	NO TAXONOMY	Species	BOLD:AAM3988	31	Dolichovespula saxonica[17], Dolichovespula pasifica[1]						GMGRA1391-13	Entomobryomorpha	Entomobryidae	Family	BOLD:ACF7880	6
GMGMI635-14	Hymenoptera	Bombus	NO TAXONOMY	Species	BOLD:AAC6016	346	Bombus lapidarius lapidarius[196], Bombus lapidarius decipiens[40], Bombus lapidarius[39], Bombus UKR02[2], Bombus lapidarius atlanticus[1]						GMGMK1547-14	Hemiptera	Cicadellidae	Family	BOLD:AAZ0265	30
GMGMD304-14	Hymenoptera	Bombus	NO TAXONOMY	Species	BOLD:AAB1062	321	Bombus terrestris[141], Bombus terrestris terrestris[7], Bombus UKR01[5], Bombus terrestris subsp. audax[4], Bombus terrestris dalmatinus[3], Bombus terrestris audax[3], Bombus terrestris lusitanicus[2], Bombus maderensis[2], Bombus terrestris xanthopus[1], Bombus terrestris sassaricus[1], Bombus terrestris calabricus[1], Bombus ITAspB[1], Bombus pascuorum[1], Bombus terrestris africanus[1], Bomb…						GMGMJ545-14	Hemiptera	Aphidinae	Family	BOLD:ABA5792	8
GMGMI880-14	Hymenoptera	Bombus	NO TAXONOMY	Species	BOLD:AAB1065	55	Bombus soroeensis[32], Bombus sp.[15]						GMGMD1006-14	Hemiptera	Cicadellidae	Family	BOLD:ABZ9658	4
GMGMN580-14	Hymenoptera	Bombus	NO TAXONOMY	Species	BOLD:AAD8221	18	Bombus campestris[13], Bombus bellardii[2]						GMGRB2079-13	Hemiptera	Aphididae	Family	BOLD:ACC0318	53
GMGMH1422-14	Hymenoptera	Nematus	NO TAXONOMY	Species	BOLD:AAM4920	43	Nematus myosotidis[31], Nematus incompletus[7], Nematus zaddachi[1]						GMGRD3467-13	Hemiptera	Cicadellidae	Family	BOLD:ACC0638	7
GMGRF4559-13	Hymenoptera	Cubocephalus	NO TAXONOMY	Species	BOLD:ACR4325	15	Cubocephalus septentrionalis[2], Cubocephalus sperator[1]						GMGML1586-14	Hemiptera	Cicadellidae	Family	BOLD:ACC4476	78
GMGRG1113-13	Hymenoptera	Mesopolobus	NO TAXONOMY	Species	BOLD:AAZ7417	46	Mesopolobus gemellus[38], Mesopolobus morys[3]						GMGRE2993-13	Hemiptera	Cicadellidae	Family	BOLD:ACI4566	3
GMGMH846-14	Hymenoptera	Dolichogenidea	NO TAXONOMY	Species	BOLD:AAA5826	17	Dolichogenidea azovica[9], Dolichogenidea longicauda[4]						GMGMJ768-14	Hemiptera	Cicadellidae	Family	BOLD:ACI4634	61
GMGRF5627-13	Hymenoptera	Perithous	NO TAXONOMY	Species	BOLD:AAI2531	19	Perithous scurra[11], Perithous speculator[1]						GMGRD3721-13	Hemiptera	Cicadellidae	Family	BOLD:ACI5079	2
GMGML016-14	Hymenoptera	Rhembobius	NO TAXONOMY	Species	BOLD:AAH3870	4	Rhembobius perscrutator[1], Rhembobius perscrufator[1]						GMGMK388-14	Hemiptera	Cicadellidae	Family	BOLD:ACI5356	36
GMGMD293-14	Hymenoptera	Ammophila	NO TAXONOMY	Species	BOLD:AAN3801	35	Ammophila sabulosa[25], Ammophila sabulosa sabulosa[5]						GMGMB346-14	Hemiptera	Aphididae	Family	BOLD:ACI9822	6
GMGMJ1427-14	Hymenoptera	Ancistrocerus	NO TAXONOMY	Species	BOLD:AAF4164	46	Ancistrocerus gazella[44], Ancistrocerus parietum[1]						GMGMN983-14	Hemiptera	Delphacidae	Family	BOLD:ACJ3865	51
GMGMI223-14	Hymenoptera	Sphecodes	NO TAXONOMY	Species	BOLD:AAD7396	33	Sphecodes geoffrellus[31], Sphecodes sp. aff. geofrellus[2]						GMGRG394-13	Hemiptera	Cicadellidae	Family	BOLD:ACJ3993	5
GMGMA685-14	Hymenoptera	Gelis	NO TAXONOMY	Species	BOLD:AAI5646	24	Gelis areator[10], Gelis cinctus[2]						GMGRG3947-13	Hemiptera	Aphididae	Family	BOLD:ACJ7953	3
GMGMJ388-14	Hymenoptera	Hylaeus	NO TAXONOMY	Species	BOLD:AAE1166	77	Hylaeus hyalinatus[58], Hylaeus alpinus[8], Hylaeus sp. A[3], Hylaeus incongruus[1]						GMGRI029-13	Hemiptera	Aphididae	Family	BOLD:ACJ8466	2
GMGMA972-14	Hymenoptera	Mesochorus	NO TAXONOMY	Species	BOLD:ABX9112	14	Mesochorus solus[2], Mesochorus angustatus[1]						GMGMD918-14	Hemiptera	Cicadellidae	Family	BOLD:ACJ8944	14
GMGMD526-14	Hymenoptera	Gasteruption	NO TAXONOMY	Species	BOLD:AAM4594	9	Gasteruption caucasicum[6], Gasteruption pedemontanum[1]						GMGMB313-14	Hemiptera	Cicadellidae	Family	BOLD:ACO7031	14
GMGMI211-14	Hymenoptera	Tromatobia	NO TAXONOMY	Species	BOLD:AAW8049	30	Tromatobia oculatoria[6], Tromatobia lineatoria[4], Tromatobia vriabilis[1]						GMGMB341-14	Hemiptera	Cicadellidae	Family	BOLD:ACO7529	8
GMGRE1650-13	Hymenoptera	Eumenes	NO TAXONOMY	Species	BOLD:AAN3639	29	Eumenes coronatus[22], Eumenes coarctatus[3]						GMGMC569-14	Hemiptera	Cicadellidae	Family	BOLD:ACP5821	7
GMGRD1891-13	Hymenoptera	Athalia	NO TAXONOMY	Species	BOLD:AAJ9512	33	Athalia cornubiae[6], Athalia liberta[1]						GMGMB365-14	Hemiptera	Cicadellidae	Family	BOLD:ACP5911	7
GMGMC874-14	Hymenoptera	Athalia	NO TAXONOMY	Species	BOLD:AAP1621	60	Athalia cordata[30], Athalia circularis[1]						GMGMM1358-14	Hemiptera	Cicadellidae	Family	BOLD:ACP5995	19
GMGMJ143-14	Hymenoptera	Chrysotoxum	NO TAXONOMY	Species	BOLD:ACF2642	25	Chrysotoxum festivum[13], Chrysotoxum bicinctum[3], Chrysotoxum octomaculatum[3], Chrysotoxum vernale[1], Chrysotoxum elegans[1], Chrysotoxum arcuatum[1]						GMGMM386-14	Hemiptera	Aphidinae	Family	BOLD:ACQ1354	6
GMGMN294-14	Hymenoptera	Agapeta	NO TAXONOMY	Species	BOLD:AAB9919	51	Agapeta hamana[47], Agapeta angelana[1]						GMGMJ788-14	Hemiptera	Cicadellidae	Family	BOLD:ACQ1394	18
GMGMA710-14	Hymenoptera	Cryptus	NO TAXONOMY	Species	BOLD:ABX4882	8	Cryptus dianae[3], Cryptus armator[2], Cryptus titubator[1]						GMGML1170-14	Hemiptera	Cixiidae	Family	BOLD:ACQ4203	2
GMGMA501-14	Hymenoptera	Nomada fabriciana	Nomada fabriciana	Species	BOLD:AAE5753	17	Nomada fabriciana[14], Nomada rostrata[2], Nomada opaca[1]						GMGMB357-14	Hemiptera	Cicadellidae	Family	BOLD:ACQ4574	4
GMGMF1569-14	Hymenoptera	Passaloecus borealis	Passaloecus borealis	Species	BOLD:AAM4415	9	Passaloecus borealis[7], Passaloecus gracilis[1]						GMGMB367-14	Hemiptera	Cicadellidae	Family	BOLD:ACQ5008	8
GMGMK931-14	Hymenoptera	Pemphredon lethifer	Pemphredon lethifer	Species	BOLD:ABX5896	54	Pemphredon lethifer[51], Pemphredon sp.[1], Pemphredon inornata[1]						GMGMA262-14	Hemiptera	Cicadellidae	Family	BOLD:ACQ7765	2
GMGMM1309-14	Hymenoptera	Phaenocarpa conspurcator	Phaenocarpa conspurcator	Species	BOLD:AAG6196	24	Phaenocarpa conspurcator[3], Phaenocarpa JFT02[1]						GMGMJ428-14	Hemiptera	Aphidinae	Family	BOLD:ACR2040	6
GMGRE2852-13	Hymenoptera	Phytodietus polyzonias	Phytodietus polyzonias	Species	BOLD:AAG0379	213	Phytodietus vulgaris[24], Phytodietus pleuralis[7], Phytodietus polyzonias[5], Phytodietus sp. AB1[2], Phytodietus solandrianae[2], Phytodietus semirufus[2], Phytodietus burgessi[2], Phytodietus plesius[2], Phytodietus sp. AB2[1], Phytodietus sp. AB3[1]						GMGMK1576-14	Hemiptera	Cicadellidae	Family	BOLD:ACR2143	4
GMGMB1370-14	Hymenoptera	Platylabus iridipennis	Platylabus iridipennis	Species	BOLD:ACE1048	5	Platylabus iridipennis[4], Platylabus fennicus[1]						GMGMJ1545-14	Hemiptera	Cicadellidae	Family	BOLD:ACR2157	9
GMGMN060-14	Hymenoptera	Polistes nimpha	Polistes nimpha	Species	BOLD:AAL0103	22	Polistes nimpha[20], Polistes associus[1]						GMGML1595-14	Hemiptera	Cixiidae	Family	BOLD:ACR2175	5
GMGMI214-14	Hymenoptera	Psenulus pallipes	Psenulus pallipes	Species	BOLD:AAG8330	89	Psenulus pallipes[68], Psenulus chevrieri[7], Psenulus brevitarsis[7], Psenulus pallipes pallipes[1]						GMGMD984-14	Hemiptera	Cicadellidae	Family	BOLD:ACR2231	13
GMGMD348-14	Hymenoptera	Psenulus schencki	Psenulus schencki	Species	BOLD:AAN3868	21	Psenulus schencki[19], Psenulus pallipes[1]						GMGMJ832-14	Hemiptera	Aphidinae	Family	BOLD:ACR2534	2
GMGMA486-14	Hymenoptera	Scambus brevicornis	Scambus brevicornis	Species	BOLD:AAD0079	73	Scambus pterophori[39], Scambus brevicornis[30]						GMGMJ1569-14	Hemiptera	Aphidinae	Family	BOLD:ACR2535	2
GMGRC2916-13	Hymenoptera	Stenichneumon alpicola	Stenichneumon alpicola	Species	BOLD:AAH9910	12	Stenichneumon alpicola[2], Stenichneumon alpicula[1]						GMGMD970-14	Hemiptera	Cicadellidae	Family	BOLD:ACR2806	91
GMGMD042-14	Hymenoptera	Symplecis bicingulata	Symplecis bicingulata	Species	BOLD:ABY0072	5	Symplecis bicingulata[2], Symplecis leucostoma[2], Symplecis clipeator[1]						GMGMN991-14	Hemiptera	Cicadellidae	Family	BOLD:ACR2915	2
GMGMJ042-14	Hymenoptera	Synomelix perfidus	Synomelix perfidus	Species	BOLD:AAK1333	3	Synomelix perfidus[2], Synomelix faciator[1]						GMGMJ773-14	Hemiptera	Cicadellidae	Family	BOLD:ACR3219	3
GMGMM989-14	Hymenoptera	Trychosis legator	Trychosis legator	Species	BOLD:ABU5931	3	Trychosis legator[2], Trychosis sp.[1]						GMGMI801-14	Hemiptera	Cicadellidae	Family	BOLD:ACR3220	3
GMGMD045-14	Hymenoptera	Tycherus elongatus	Tycherus elongatus	Species	BOLD:ACC4178	15	Tycherus osculator[2], Tycherus glareosus[2], Tycherus elongatus[2]						GMGMK400-14	Hemiptera	Miridae	Family	BOLD:ACR3434	2
GMGMI222-14	Hymenoptera	Tycherus fuscicornis	Tycherus fuscicornis	Species	BOLD:ACE1042	17	Tycherus fuscicornis[9], Tycherus infimus[4], Tycherus parvitor[1], Tycherus impiger[1], Tycherus elongatus[1]						GMGMK1596-14	Hemiptera	Drepanosiphinae	Family	BOLD:ACR4939	3
GMGMN816-14	Lepidoptera	Abrostola tripartita	Abrostola tripartita	Species	BOLD:AAB6066	58	Abrostola tripartita[56], Abrostola triplasia[2]						GMGML1166-14	Hemiptera	Miridae	Family	BOLD:ACR5019	2
GMGMA526-14	Lepidoptera	Agonopterix heracliana	Agonopterix heracliana	Species	BOLD:AAC7415	271	Agonopterix heracliana[269], Agonopterix sp.[1]						GMGMM1394-14	Hemiptera	Cicadellidae	Family	BOLD:ACR5026	3
GMGML041-14	Lepidoptera	Agriopis aurantiaria	Agriopis aurantiaria	Species	BOLD:AAC2753	35	Agriopis aurantiaria[34], Agriopis BMAlb01[1]						GMGMN975-14	Hemiptera	Cicadellidae	Family	BOLD:ACR5378	2
GMGRH1814-13	Lepidoptera	Apamea crenata	Apamea crenata	Species	BOLD:AAC0154	58	Apamea crenata[55], Apamea epomidion[1]						GMGML1102-14	Hemiptera	Psyllidae	Family	BOLD:ACR5545	3
GMGMJ1348-14	Lepidoptera	Batia lambdella	Batia lambdella	Species	BOLD:AAK0036	19	Batia lambdella[18], Batia lunaris[1]						GMGRD210-13	Hymenoptera	Ichneumonidae	Family	BOLD:AAE3781	21
GMGMC1420-14	Lepidoptera	Bucculatrix demaryella	Bucculatrix demaryella	Species	BOLD:AAI8481	32	Bucculatrix demaryella[32], Bucculatrix ulmella[1]						GMGML671-14	Hymenoptera	Ichneumonidae	Family	BOLD:AAG7638	123
GMGMK920-14	Lepidoptera	Caloptilia alchimiella	Caloptilia alchimiella	Species	BOLD:AAD2588	30	Caloptilia alchimiella[29], Caloptilia robustella[1]						GMGMI473-14	Hymenoptera	Ichneumonidae	Family	BOLD:AAG7726	6
GMGMK906-14	Lepidoptera	Campaea margaritaria	Campaea margaritaria	Species	BOLD:AAB5336	64	Campaea margaritaria[61], Campaea margaritata[2]						GMGMD512-14	Hymenoptera	Tetrastichinae	Family	BOLD:AAG7984	12
GMGME230-14	Lepidoptera	Coleophora alticolella	Coleophora alticolella	Species	BOLD:AAC6419	87	Coleophora alticolella[50], Coleophora glissandella[17], Coleophora JFL041[10]						GMGRG4447-13	Hymenoptera	Platygastridae	Family	BOLD:AAG7990	66
GMGMB1288-14	Lepidoptera	Coleophora colutella	Coleophora colutella	Species	BOLD:AAY9637	29	Coleophora colutella[28], Coleophora coronillae[1]						GMGRG4415-13	Hymenoptera	Braconidae	Family	BOLD:AAG8350	9
GMGRF5622-13	Lepidoptera	Coleophora therinella	Coleophora therinella	Species	BOLD:AAC2773	41	Coleophora therinella[39], Coleophora peribenanderi[1]						GMGML1547-14	Hymenoptera	Campopleginae	Family	BOLD:AAG8409	191
GMGML1025-14	Lepidoptera	Conistra vaccinii	Conistra vaccinii	Species	BOLD:AAB7880	99	Conistra vaccinii[63], Conistra ligula[33], Conistra alicia[2]						GMGMC1039-14	Hymenoptera	Microgastrinae	Family	BOLD:AAH1064	2
GMGMM1267-14	Lepidoptera	Cucullia umbratica	Cucullia umbratica	Species	BOLD:AAC0849	42	Cucullia umbratica[40], Cucullia balsamitae[1]						GMGRA765-13	Hymenoptera	Ichneumonidae	Family	BOLD:AAH1634	7
GMGMK337-14	Lepidoptera	Cydia splendana	Cydia splendana	Species	BOLD:AAC0640	50	Cydia splendana[44], Cydia sp. OPC-2013[1]						GMGRD974-13	Hymenoptera	Ichneumonidae	Family	BOLD:AAH1855	20
GMGMJ1345-14	Lepidoptera	Dysstroma truncata	Dysstroma truncata	Species	BOLD:AAA2864	165	Dysstroma truncata[88], Dysstroma citrata[39], Dysstroma truncata traversata[13], Dysstroma suspectata mackieata[13], Dysstroma pseudimmanata[5], Dysstroma suspectata[2], Dysstroma walkerata[1]						GMGMD303-14	Hymenoptera	Ichneumonidae	Family	BOLD:AAH1959	6
GMGRB2060-13	Lepidoptera	Glyphipterix forsterella	Glyphipterix forsterella	Species	BOLD:AAD7071	12	Glyphipterix forsterella[11], Glyphipterix haworthana[1]						GMGMJ1402-14	Hymenoptera	Ichneumonidae	Family	BOLD:AAH1961	2
GMGMM013-14	Lepidoptera	Horisme radicaria	Horisme radicaria	Species	BOLD:AAC6849	31	Horisme radicaria[28], Horisme tersata[2]						GMGMK269-14	Hymenoptera	Ichneumonidae	Family	BOLD:AAH2111	7
GMGMK1051-14	Lepidoptera	Lasiommata maera	Lasiommata maera	Species	BOLD:AAA8853	115	Lasiommata maera[106], Lasiommata adrastoides[2], Lasiommata maera orientalis[2], Lasiommata petropolitana[1], Lasiommata megera[1], Lasiommata meadewaldoi[1]						GMGMN586-14	Hymenoptera	Alysiinae	Family	BOLD:AAH3126	23
GMGMM082-14	Lepidoptera	Lithosia quadra	Lithosia quadra	Species	BOLD:AAB8723	75	Lithosia quadra[70], Lithosia quadra dives[4], Lithosia yuennanensis[1]						GMGMD573-14	Hymenoptera	Alysiinae	Family	BOLD:AAH3131	17
GMGMI907-14	Lepidoptera	Lymantria dispar	Lymantria dispar	Species	BOLD:AAA2052	722	Lymantria dispar[428], Lymantria dispar dispar[203], Lymantria dispar asiatica[60], Lymantria umbrosa[12], Lymantria dispar japonica[5], Lymantria lunata[4], Lymantria sp.[1]						GMGMN571-14	Hymenoptera	Alysiinae	Family	BOLD:AAH3139	9
GMGMH1177-14	Lepidoptera	Mesapamea secalella	Mesapamea secalella	Species	BOLD:AAB2749	197	Mesapamea secalis[78], Mesapamea secalella[45], Mesapamea remmi[19], Mesapamea didyma[10], Mesapamea sp.[2], Mesapamea insolita[1], Mesapamea secalis agg.[1]						GMGRH098-13	Hymenoptera	Braconidae	Family	BOLD:AAH3140	5
GMGRA1366-13	Lepidoptera	Mompha subbistrigella	Mompha subbistrigella	Species	BOLD:AAD0702	45	Mompha subbistrigella[44], Mompha sturnipennella[1]						GMGMD468-14	Hymenoptera	Alysiinae	Family	BOLD:AAH3150	3
GMGMA579-14	Lepidoptera	Orgyia	NO TAXONOMY	Species	BOLD:AAA6432	68	Orgyia antiqua[61], Orgyia antiqua nova[2]						GMGMK428-14	Hymenoptera	Cryptinae	Family	BOLD:AAM7523	10
GMGMA483-14	Lepidoptera	Acleris	NO TAXONOMY	Species	BOLD:AAC3487	32	Acleris ferrugana[25], Acleris notana[2]						GMGRF1985-13	Hymenoptera	Braconidae	Family	BOLD:AAU8209	210
GMGME086-14	Lepidoptera	Scoparia	NO TAXONOMY	Species	BOLD:AAB1555	126	Scoparia ambigualis[68], Scoparia basistrigalis[46], Scoparia subfusca[2], Scoparia conicella[1]						GMGMA1094-14	Hymenoptera	Ichneumonidae	Family	BOLD:AAU8487	20
GMGMN268-14	Lepidoptera	Elachista	NO TAXONOMY	Species	BOLD:AAD9985	94	Elachista freyerella[51], Elachista baltica[10], Elachista nr. freyerella[1]						GMGMB615-14	Hymenoptera	Ichneumonidae	Family	BOLD:AAU8502	90
GMGML1288-14	Lepidoptera	Crocallis	NO TAXONOMY	Species	BOLD:AAB0677	62	Crocallis elinguaria[52], Crocallis albarracina[5], Crocallis inexpectata[1], Crocallis elinguariaAH11[1], Crocallis elinguariaAH01[1], Crocallis elinguariaAH02[1]						GMGMC456-14	Hymenoptera	Braconidae	Family	BOLD:AAU8586	2
GMGMA1153-14	Lepidoptera	Maniola	NO TAXONOMY	Species	BOLD:AAA7786	42	Maniola jurtina[28], Maniola nurag[4], Maniola cypricola[3], Maniola telmessia[1]						GMGRB1430-13	Hymenoptera	Diapriidae	Family	BOLD:AAU9135	57
GMGMB1380-14	Lepidoptera	Aphantopus	NO TAXONOMY	Species	BOLD:AAB1940	71	Aphantopus hyperantus[64], Aphantopus bieti[2]						GMGMC1002-14	Hymenoptera	Cryptinae	Family	BOLD:AAU9315	5
GMGMI1053-14	Lepidoptera	Archips	NO TAXONOMY	Species	BOLD:AAB5839	48	Archips podana[45], Archips podanus[1]						GMGRI668-13	Hymenoptera	Ichneumonidae	Family	BOLD:AAU9477	8
GMGML047-14	Lepidoptera	Eudonia	NO TAXONOMY	Species	BOLD:AAB3829	57	Eudonia lacustrata[53], Eudonia stenota[1]						GMGRG1179-13	Hymenoptera	Ichneumonidae	Family	BOLD:AAU9720	10
GMGML1075-14	Lepidoptera	Timandra	NO TAXONOMY	Species	BOLD:AAB0828	85	Timandra comae[68], Timandra griseata[17]						GMGRG4164-13	Hymenoptera	Ichneumonidae	Family	BOLD:AAW0431	22
GMGML1215-14	Lepidoptera	Udea	NO TAXONOMY	Species	BOLD:AAQ1018	10	Udea fulvalis[7], Udea bipunctalis[2]						GMGMM932-14	Hymenoptera	Microgastrinae	Family	BOLD:AAZ8759	2
GMGMI963-14	Lepidoptera	Xestia	NO TAXONOMY	Species	BOLD:AAF0752	25	Xestia stigmatica[14], Xestia rhomboidea[9]						GMGMA1238-14	Hymenoptera	Alysiinae	Family	BOLD:AAZ8841	2
GMGMK913-14	Lepidoptera	Dichrorampha	NO TAXONOMY	Species	BOLD:AAD3189	26	Dichrorampha simpliciana[23], Dichrorampha cancellatana[1]						GMGMN1205-14	Hymenoptera	Diapriidae	Family	BOLD:ABA1018	2
GMGMK1046-14	Lepidoptera	Celastrina	NO TAXONOMY	Species	BOLD:AAA7663	202	Celastrina argiolus[189], Celastrina argiolus paraleuca[1], Celastrina argiolus ladonides[1]						GMGRE008-13	Hymenoptera	Pteromalidae	Family	BOLD:ABA5961	10
GMGMG009-14	Lepidoptera	Colias	NO TAXONOMY	Species	BOLD:ABZ3039	249	Colias croceus[132], Colias crocea[67], Colias erate[34], Colias marnoana[4], Colias alfacariensis[2], Colias hyale[1], Colias erate poliographus[1], Colias croacia[1]						GMGRF4341-13	Hymenoptera	Eulophidae	Family	BOLD:ABA5969	8
GMGMD043-14	Lepidoptera	Agrotis	NO TAXONOMY	Species	BOLD:AAC3884	91	Agrotis segetum[81], Agrotis scotacra[4], Agrotis trux[1]						GMGRC1266-13	Hymenoptera	Diapriidae	Family	BOLD:ABA8019	4
GMGMA566-14	Lepidoptera	Thecla	NO TAXONOMY	Species	BOLD:AAB5999	40	Thecla betulae[38], Thecla betulae coreana[1]						GMGRF4385-13	Hymenoptera	Hymenoptera	Family	BOLD:ABA9126	2
GMGMN1128-14	Lepidoptera	Yponomeuta	NO TAXONOMY	Species	BOLD:AAA7740	282	Yponomeuta cagnagella[72], Yponomeuta malinellus[69], Yponomeuta evonymella[44], Yponomeuta padella[39], Yponomeuta irrorella[21], Yponomeuta rorrella[8], Yponomeuta evonymellus[4], Yponomeuta padellus[2], Yponomeuta cagnagellus[1], Yponomeuta mahalebella[1]						GMGRE3553-13	Hymenoptera	Braconidae	Family	BOLD:ABA9140	144
GMGRA1367-13	Lepidoptera	Coleophora	NO TAXONOMY	Species	BOLD:AAS0375	4	Coleophora BLDZ001[1], Coleophora adjectella[1]						GMGRE3540-13	Hymenoptera	Eulophinae	Family	BOLD:ABU6772	2
GMGMB007-14	Lepidoptera	Phyllonorycter	NO TAXONOMY	Species	BOLD:ACR3738	27	Phyllonorycter oxyacanthae[8], Phyllonorycter cydoniella[1]						GMGRB1408-13	Hymenoptera	Platygastridae	Family	BOLD:ABW3169	26
GMGMI197-14	Lepidoptera	Aglais	NO TAXONOMY	Species	BOLD:AAA9652	115	Aglais urticae[104], Aglais ichnusa[8], Aglais nixa[1]						GMGMD470-14	Hymenoptera	Ichneumonidae	Family	BOLD:ABW3367	2
GMGMM1338-14	Lepidoptera	Camptogramma	NO TAXONOMY	Species	BOLD:AAA8017	92	Camptogramma bilineata[78], Camptogramma grisescens[7], Camptogramma bistrigata[4]						GMGRF4324-13	Hymenoptera	Eulophidae	Family	BOLD:ACB3067	19
GMGMA518-14	Lepidoptera	Aplocera	NO TAXONOMY	Species	BOLD:AAA8276	84	Aplocera plagiata[75], Aplocera plagiataGP01Ir[4], Aplocera plagiata scotica[1]						GMGRD1055-13	Hymenoptera	Diapriidae	Family	BOLD:ACB3428	11
GMGMK888-14	Lepidoptera	Papilio	NO TAXONOMY	Species	BOLD:AAA5810	241	Papilio machaon[215], Papilio brevicauda[11], Papilio saharae[5], Papilio machaon rinpoche[2], Papilio machaon hippocrates[2], Papilio kahli[2], Papilio sp.[1], Papilio machaon syriacus[1], Papilio hospiton[1]						GMGRC927-13	Hymenoptera	Diapriidae	Family	BOLD:ACC0797	10
GMGMJ1352-14	Lepidoptera	Apamea	NO TAXONOMY	Species	BOLD:AAA4201	187	Apamea sordens[167], Apamea digitula[14], Apamea sordens finitima[2], Apamea sp. nr. sordens[1]						GMGRD3198-13	Hymenoptera	Diapriidae	Family	BOLD:ACC1837	46
GMGMA1162-14	Lepidoptera	Anthocharis	NO TAXONOMY	Species	BOLD:AAB1133	127	Anthocharis cardamines[115], Anthocharis cardamines phoenissa[3]						GMGRH134-13	Hymenoptera	Diapriidae	Family	BOLD:ACC1986	32
GMGMA530-14	Lepidoptera	Agrotis	NO TAXONOMY	Species	BOLD:AAB9164	56	Agrotis puta[49], Agrotis schawerdai[2], Agrotis puta puta[1], Agrotis catalaunensis[1], Agrotis catalaunensis catalaunensis[1]						GMGRG4457-13	Hymenoptera	Scelioninae	Family	BOLD:ACC2480	6
GMGRE2848-13	Lepidoptera	Carterocephalus	NO TAXONOMY	Species	BOLD:AAA6267	123	Carterocephalus palaemon[100], Carterocephalus silvicola[19]						GMGRC939-13	Hymenoptera	Platygastridae	Family	BOLD:ACC2661	61
GMGMC025-14	Lepidoptera	Cnephasia	NO TAXONOMY	Species	BOLD:AAA6293	129	Cnephasia asseclana[120], Cnephasia stephensiana[2], Cnephasia communana[1]						GMGRF4448-13	Hymenoptera	Platygastridae	Family	BOLD:ACC3304	9
GMGMI196-14	Lepidoptera	Notocelia	NO TAXONOMY	Species	BOLD:AAC3246	44	Notocelia cynosbatella[38], Notocelia illotana[5]						GMGRG1151-13	Hymenoptera	Braconidae	Family	BOLD:ACC3917	22
GMGMB425-14	Lepidoptera	Hedya	NO TAXONOMY	Species	BOLD:AAD0577	38	Hedya pruniana[27], Hedya nubiferana[1]						GMGMA107-14	Hymenoptera	Diapriidae	Family	BOLD:ACC4133	12
GMGMH1132-14	Lepidoptera	Noctua	NO TAXONOMY	Species	BOLD:AAA2632	233	Noctua pronuba[225], Noctua atlantica[2]						GMGRE720-13	Hymenoptera	Diapriidae	Family	BOLD:ACC4347	3
GMGMK197-14	Lepidoptera	Melanargia	NO TAXONOMY	Species	BOLD:AAA6940	357	Melanargia galathea[125], Melanargia larissa[52], Melanargia lachesis[50], Melanargia hylata[41], Melanargia titea[36], Melanargia syriaca[30], Melanargia grumi[10], Melanargia titea titania[1], Melanargia sp.[1]						GMGRG1115-13	Hymenoptera	Diapriidae	Family	BOLD:ACC4369	4
GMGMI217-14	Lepidoptera	Ochlodes	NO TAXONOMY	Species	BOLD:AAB4864	129	Ochlodes sylvanus[105], Ochlodes faunus[5], Ochlodes venatus[1]						GMGRF4590-13	Hymenoptera	Braconidae	Family	BOLD:ACC4430	9
GMGML057-14	Lepidoptera	Melanthia	NO TAXONOMY	Species	BOLD:AAC2189	34	Melanthia procellata[28], Melanthia procellata inquinata[1]						GMGMI1338-14	Hymenoptera	Platygastridae	Family	BOLD:ACC4563	53
GMGRF5621-13	Lepidoptera	Epirrhoe	NO TAXONOMY	Species	BOLD:AAB2097	35	Epirrhoe galiata[31], Epirrhoe timozzaria[1], Epirrhoe galiataAH01Li[1]						GMGML960-14	Hymenoptera	Cryptinae	Family	BOLD:ACC4659	26
GMGMA1067-14	Lepidoptera	Ectropis	NO TAXONOMY	Species	BOLD:ACE6053	43	Ectropis crepuscularia[39], Ectropis sp. bist1[2]						GMGRD3230-13	Hymenoptera	Mymaridae	Family	BOLD:ACC4962	6
GMGMA583-14	Lepidoptera	Macaria	NO TAXONOMY	Species	BOLD:AAA1496	55	Macaria alternata[44], Macaria alternaria[3], Macaria notata[2]						GMGRH122-13	Hymenoptera	Hymenoptera	Family	BOLD:ACC4964	9
GMGME1099-14	Lepidoptera	Oligia	NO TAXONOMY	Species	BOLD:AAB4833	177	Oligia strigilis[85], Oligia versicolor[43], Oligia fasciuncula[22], Oligia dubia[11], Oligia latruncula[3]						GMGRD3361-13	Hymenoptera	Platygastridae	Family	BOLD:ACC5622	28
GMGMM087-14	Lepidoptera	Coleophora	NO TAXONOMY	Species	BOLD:AAB5543	146	Coleophora serratella[99], Coleophora nr. spinella[8], Coleophora spinella[3]						GMGRF5584-13	Hymenoptera	Ichneumonidae	Family	BOLD:ACC6524	4
GMGMA490-14	Lepidoptera	Coleophora	NO TAXONOMY	Species	BOLD:AAD9304	17	Coleophora trigeminella[15], Coleophora iljiniae[1]						GMGRG1114-13	Hymenoptera	Diapriidae	Family	BOLD:ACC6590	2
GMGRF5625-13	Lepidoptera	Isotrias	NO TAXONOMY	Species	BOLD:AAE5807	30	Isotrias rectifasciana[19], Isotrias hybridana[3]						GMGMK765-14	Hymenoptera	Campopleginae	Family	BOLD:ACC6729	14
GMGMM1268-14	Lepidoptera	Anthophila	NO TAXONOMY	Species	BOLD:AAC8582	27	Anthophila fabriciana[24], Anthophila fabriciania[1]						GMGRH2613-13	Hymenoptera	Platygastridae	Family	BOLD:ACC6795	35
GMGMB009-14	Lepidoptera	Pieris	NO TAXONOMY	Species	BOLD:AAA2224	532	Pieris rapae[485], Pieris rapae debilis[2], Pieris napi[2], Pieris rapae rapae[1], Pieris rapae crucivora[1], Pieris extensa[1]						GMGRD225-13	Hymenoptera	Diapriidae	Family	BOLD:ACC6895	1
GMGRD3488-13	Lepidoptera	Apamea	NO TAXONOMY	Species	BOLD:AAD2274	36	Apamea lithoxylaea[31], Apamea lithoxylia[1]						GMGMI1354-14	Hymenoptera	Ichneumonidae	Family	BOLD:ACC7343	2
GMGMB411-14	Lepidoptera	Polygonia	NO TAXONOMY	Species	BOLD:ABY7043	205	Polygonia c-album[103], Polygonia calbum[88], Polygonia interposita[5], Polygonia calbum hamigera[2]						GMGRA1454-13	Hymenoptera	Cynipidae	Family	BOLD:ACD0130	3
GMGMI212-14	Lepidoptera	Aphantopus	NO TAXONOMY	Species	BOLD:ACF2774	11	Aphantopus hyperantus[9], Aphantopus bieti[1]						GMGRH142-13	Hymenoptera	Ichneumonidae	Family	BOLD:ACD0543	3
GMGMH1427-14	Lepidoptera	Eilema	NO TAXONOMY	Species	BOLD:AAB6833	48	Eilema lurideola[40], Eilema complana[2], Eilema AH03Gg[1]						GMGRE1491-13	Hymenoptera	Ichneumonidae	Family	BOLD:ACD4925	7
GMGMD022-14	Lepidoptera	Lepidoptera	NO TAXONOMY	Species	BOLD:AAG5877	42	Zanclognatha lunalis[32], Zanclognatha lui[1]						GMGRA1405-13	Hymenoptera	Platygastridae	Family	BOLD:ACD8715	5
GMGMJ176-14	Lepidoptera	Teleiodes	NO TAXONOMY	Species	BOLD:AAE9855	35	Teleiodes vulgella[26], Teleiodes italica[4]						GMGRD1074-13	Hymenoptera	Diapriidae	Family	BOLD:ACD9748	10
GMGMD1079-14	Lepidoptera	Chamaesphecia	NO TAXONOMY	Species	BOLD:AAC0677	51	Chamaesphecia empiformis[36], Chamaesphecia hungarica[12]						GMGRD1896-13	Hymenoptera	Diapriidae	Family	BOLD:ACE0017	11
GMGMH1125-14	Lepidoptera	Endothenia	NO TAXONOMY	Species	BOLD:AAF0269	19	Endothenia nigricostana[17], Endothenia pullana[1]						GMGMI1092-14	Hymenoptera	Ichneumoninae	Family	BOLD:ACF1483	2
GMGRB2069-13	Lepidoptera	Noctua	NO TAXONOMY	Species	BOLD:AAA7574	92	Noctua janthe[89], Noctua janthina[4]						GMGRB1861-13	Hymenoptera	Braconidae	Family	BOLD:ACF6022	2
GMGMK1044-14	Lepidoptera	Epiblema	NO TAXONOMY	Species	BOLD:AAC0715	49	Epiblema scutulana[28], Epiblema cirsiana[15], Epiblema scutulanum[2], Epiblema sticticana[1], Epiblema cirsianum[1]						GMGML1484-14	Hymenoptera	Ichneumonidae	Family	BOLD:ACF6023	12
GMGMA1156-14	Lepidoptera	Blastodacna	NO TAXONOMY	Species	BOLD:AAF0377	27	Blastodacna atra[14], Blastodacna hellerella[7]						GMGRB1862-13	Hymenoptera	Platygastridae	Family	BOLD:ACF6024	12
GMGRF5624-13	Lepidoptera	Agonopterix	NO TAXONOMY	Species	BOLD:AAD6889	27	Agonopterix alstromeriana[14], Agonopterix alstroemeriana[10]						GMGRC2246-13	Hymenoptera	Platygastridae	Family	BOLD:ACF6280	12
GMGMN1202-14	Lepidoptera	Coleophora	NO TAXONOMY	Species	BOLD:AAC4531	40	Coleophora spinella[38], Coleophora serratella[1]						GMGRC964-13	Hymenoptera	Hymenoptera	Family	BOLD:ACF6281	11
GMGMF1543-14	Lepidoptera	Coleophora	NO TAXONOMY	Species	BOLD:AAC3993	62	Coleophora flavipennella[53], Coleophora ochripennella[1]						GMGRC947-13	Hymenoptera	Braconidae	Family	BOLD:ACF6344	6
GMGML046-14	Lepidoptera	Phragmatobia	NO TAXONOMY	Species	BOLD:AAA6178	62	Phragmatobia fuliginosa[54], Phragmatobia fuliginosaAh01[2], Phragmatobia amurensis[2]						GMGRB1445-13	Hymenoptera	Braconidae	Family	BOLD:ACF6847	2
GMGMG1324-14	Lepidoptera	Thymelicus	NO TAXONOMY	Species	BOLD:AAA6759	138	Thymelicus lineola[130], Thymelicus sylvestris[1]						GMGRA1448-13	Hymenoptera	Platygastridae	Family	BOLD:ACF7421	3
GMGMK185-14	Lepidoptera	Idaea	NO TAXONOMY	Species	BOLD:AAA8256	79	Idaea aversata[72], Idaea gelbrechti[5], Idaea deversaria[1]						GMGRB1381-13	Hymenoptera	Platygastridae	Family	BOLD:ACF7527	20
GMGMK238-14	Lepidoptera	Horisme	NO TAXONOMY	Species	BOLD:AAB3583	59	Horisme vitalbata[33], Horisme vitalbata staudingeri[11], Horisme incana[10], Horisme detersata[1]						GMGRB015-13	Hymenoptera	Platygastridae	Family	BOLD:ACF7816	3
GMGMA484-14	Lepidoptera	Oegoconia novimundi	Oegoconia novimundi	Species	BOLD:AAH4681	51	Oegoconia novimundi[46], Oegoconia quadripuncta[2]						GMGRA1466-13	Hymenoptera	Braconidae	Family	BOLD:ACF7982	2
GMGMH1137-14	Lepidoptera	Oligia latruncula	Oligia latruncula	Species	BOLD:AAB7661	76	Oligia latruncula[75], Oligia versicolor[1]						GMGRD221-13	Hymenoptera	Ichneumonidae	Family	BOLD:ACF8713	3
GMGMI216-14	Lepidoptera	Orthosia incerta	Orthosia incerta	Species	BOLD:ABY5277	62	Orthosia incerta[57], Orthosia sp.[2], Orthosia cerasi[1]						GMGRB1474-13	Hymenoptera	Eulophidae	Family	BOLD:ACF9111	2
GMGRE2857-13	Lepidoptera	Pammene ignorata	Pammene ignorata	Species	BOLD:AAF1865	11	Pammene ignorata[10], Pammene gallicolana[1]						GMGRB1442-13	Hymenoptera	Diapriidae	Family	BOLD:ACF9113	1
GMGMD051-14	Lepidoptera	Pararge aegeria	Pararge aegeria	Species	BOLD:AAA4515	235	Pararge aegeria[234], Pararge aegeria aegeria[1]						GMGRD2955-13	Hymenoptera	Platygastridae	Family	BOLD:ACF9215	14
GMGML1194-14	Lepidoptera	Stigmella myrtillella	Stigmella myrtillella	Species	BOLD:AAJ4189	30	Stigmella myrtillella[25], Stigmella salicis[4], Stigmella salicis_Sardinia[1]						GMGRC2268-13	Hymenoptera	Platygastridae	Family	BOLD:ACF9217	29
GMGMJ210-14	Lepidoptera	Triphosa dubitata	Triphosa dubitata	Species	BOLD:AAD3995	37	Triphosa dubitata[31], Triphosa dubiata[5]						GMGRC1240-13	Hymenoptera	Platygastridae	Family	BOLD:ACF9219	2
GMGMI969-14	Mecoptera	Panorpa communis	Panorpa communis	Species	BOLD:ACF8170	28	Panorpa communis[25], Panorpa vulgaris[2]						GMGRC1239-13	Hymenoptera	Platygastridae	Family	BOLD:ACF9220	2
GMGME241-14	Neuroptera	Chrysopa perla	Chrysopa perla	Species	BOLD:AAJ5114	30	Chrysopa perla[26], Chrysopa intima[4]						GMGRB1420-13	Hymenoptera	Platygastridae	Family	BOLD:ACF9487	36
GMGMD232-14	Neuroptera	Chrysoperla	NO TAXONOMY	Species	BOLD:AAB0373	256	Chrysoperla carnea[34], Chrysoperla agilis[24], Chrysoperla lucasina[15], Chrysoperla adamsi[6], Chrysoperla pallida[4], Chrysoperla nipponensis[4], Chrysoperla plorabunda[3], Chrysoperla sp. isolate 88[1], Chrysoperla sp. isolate 82[1], Chrysoperla sillemi[1], Chrysoperla sp. isolate 71[1]						GMGMB791-14	Hymenoptera	Braconidae	Family	BOLD:ACF9536	17
GMGML1212-14	Neuroptera	Coniopteryx	NO TAXONOMY	Species	BOLD:AAU4144	20	Coniopteryx esbenpeterseni[7], Coniopteryx lentiae[4]						GMGRD1876-13	Hymenoptera	Ichneumonidae	Family	BOLD:ACF9564	6
GMGRC2972-13	Neuroptera	Hemerobius	NO TAXONOMY	Species	BOLD:AAP2910	25	Hemerobius marginatus[20], Hemerobius marginatus lapponicus[3], Hemerobius ovalis[1]						GMGRD2949-13	Hymenoptera	Scelioninae	Family	BOLD:ACF9681	2
GMGME238-14	Neuroptera	Hemerobius	NO TAXONOMY	Species	BOLD:AAG0892	158	Hemerobius humulinus[112], Hemerobius perelegans[4], Hemerobius ovalis[1]						GMGMA1038-14	Hymenoptera	Campopleginae	Family	BOLD:ACG3043	3
GMGRE2935-13	Neuroptera	Wesmaelius nervosus	Wesmaelius nervosus	Species	BOLD:ACF3795	14	Wesmaelius nervosus[13], Wesmaelius subnebulosus[1]						GMGRC2271-13	Hymenoptera	Scelioninae	Family	BOLD:ACG3314	2
GMGMF1117-14	Orthoptera	Tetrix tenuicornis	Tetrix tenuicornis	Species	BOLD:AAC1702	25	Tetrix tenuicornis[22], Tetrix japonica[3]						GMGRC2240-13	Hymenoptera	Platygastridae	Family	BOLD:ACG3318	3
GMGRF5311-13	Plecoptera	Siphonoperla torrentium	Siphonoperla torrentium	Species	BOLD:AAE8926	15	Siphonoperla torrentium[10], Siphonoperla torrentium torrentium[2], Siphonoperla cf. torrentium[2]						GMGRA1812-13	Hymenoptera	Ichneumonidae	Family	BOLD:ACG3448	2
GMGRC2178-13	Psocoptera	Ectopsocus	NO TAXONOMY	Species	BOLD:AAY6680	176	Ectopsocus briggsi[51], Ectopsocus californicus[1]						GMGRA1680-13	Hymenoptera	Ichneumonidae	Family	BOLD:ACG3629	2
GMGRB2055-13	Psocoptera	Stenopsocus lachlani	Stenopsocus lachlani	Species	BOLD:ABA6547	24	Stenopsocus lachlani[23], Stenopsocus immaculatus[2]						GMGRC900-13	Hymenoptera	Braconidae	Family	BOLD:ACG3772	5
GMGRF5358-13	Thysanoptera	Thrips physapus	Thrips physapus	Species	BOLD:AAN9105	122	Thrips physapus[111], Thrips trehernei[9], Thrips pelikani[3]						GMGRC880-13	Hymenoptera	Braconidae	Family	BOLD:ACG3773	7
GMGMA520-14	Trichoptera	Drusus annulatus	Drusus annulatus	Species	BOLD:AAL1918	24	Drusus annulatus[19], Drusus cf. nec[5]						GMGRD230-13	Hymenoptera	Ichneumonidae	Family	BOLD:ACG3881	2
GMGMK675-14	Trichoptera	Stenophylax	NO TAXONOMY	Species	BOLD:AAI0072	22	Stenophylax permistus[18], Stenophylax vibex[1], Stenophylax meridiorientalis[1]						GMGRD243-13	Hymenoptera	Ichneumonidae	Family	BOLD:ACG3882	5
GMGMH1434-14	Trichoptera	Hydropsyche	NO TAXONOMY	Species	BOLD:AAD1254	72	Hydropsyche incognita[61], Hydropsyche sp. WIC1[1], Hydropsyche saxonica[1], Hydropsyche botosaneanui[1]						GMGRD242-13	Hymenoptera	Diapriidae	Family	BOLD:ACG3883	2
													GMGRD235-13	Hymenoptera	Ichneumonidae	Family	BOLD:ACG3884	2
													GMGRD3154-13	Hymenoptera	Diapriidae	Family	BOLD:ACG4055	7
													GMGRC878-13	Hymenoptera	Diapriidae	Family	BOLD:ACG4056	15
													GMGRD255-13	Hymenoptera	Braconidae	Family	BOLD:ACG4057	15
													GMGRC866-13	Hymenoptera	Ichneumonidae	Family	BOLD:ACG4389	2
													GMGRD942-13	Hymenoptera	Braconidae	Family	BOLD:ACG4722	2
													GMGRD3445-13	Hymenoptera	Ichneumonidae	Family	BOLD:ACG4723	4
													GMGRD947-13	Hymenoptera	Ichneumonidae	Family	BOLD:ACG4725	11
													GMGRD961-13	Hymenoptera	Ichneumonidae	Family	BOLD:ACG4851	42
													GMGRD966-13	Hymenoptera	Ichneumonidae	Family	BOLD:ACG4852	2
													GMGMC1399-14	Hymenoptera	Ichneumonidae	Family	BOLD:ACG5109	3
													GMGRD3434-13	Hymenoptera	Ichneumonidae	Family	BOLD:ACG5246	12
													GMGRD1904-13	Hymenoptera	Braconidae	Family	BOLD:ACG5320	3
													GMGRD1026-13	Hymenoptera	Ichneumonidae	Family	BOLD:ACG5442	9
													GMGRD1032-13	Hymenoptera	Ichneumonidae	Family	BOLD:ACG5443	2
													GMGRD3429-13	Hymenoptera	Ichneumonidae	Family	BOLD:ACG6967	5
													GMGRE1465-13	Hymenoptera	Ichneumonidae	Family	BOLD:ACG6969	4
													GMGRE1643-13	Hymenoptera	Ichneumonidae	Family	BOLD:ACG7041	26
													GMGMI1366-14	Hymenoptera	Ichneumonidae	Family	BOLD:ACG7103	15
													GMGRE707-13	Hymenoptera	Braconidae	Family	BOLD:ACG7731	8
													GMGRE1628-13	Hymenoptera	Braconidae	Family	BOLD:ACG7805	4
													GMGRE3495-13	Hymenoptera	Braconidae	Family	BOLD:ACG7926	13
													GMGRE712-13	Hymenoptera	Braconidae	Family	BOLD:ACG7927	4
													GMGRE1639-13	Hymenoptera	Belytinae	Family	BOLD:ACG8044	18
													GMGRE746-13	Hymenoptera	Ichneumonidae	Family	BOLD:ACG8212	2
													GMGMM717-14	Hymenoptera	Torymidae	Family	BOLD:ACH0627	2
													GMGRF1043-13	Hymenoptera	Eulophidae	Family	BOLD:ACH2027	3
													GMGRE3116-13	Hymenoptera	Ichneumonidae	Family	BOLD:ACH2062	6
													GMGMB638-14	Hymenoptera	Banchinae	Family	BOLD:ACH2942	9
													GMGMM1039-14	Hymenoptera	Tryphoninae	Family	BOLD:ACH4158	20
													GMGMA739-14	Hymenoptera	Tryphoninae	Family	BOLD:ACH4214	3
													GMGMJ380-14	Hymenoptera	Ctenopelmatinae	Family	BOLD:ACH4322	13
													GMGMJ1423-14	Hymenoptera	Metopiinae	Family	BOLD:ACH4334	24
													GMGMK426-14	Hymenoptera	Campopleginae	Family	BOLD:ACH4353	8
													GMGRE2219-13	Hymenoptera	Platygastridae	Family	BOLD:ACI2767	2
													GMGRE2264-13	Hymenoptera	Platygastridae	Family	BOLD:ACI3360	2
													GMGRE767-13	Hymenoptera	Diapriidae	Family	BOLD:ACI4064	8
													GMGRD3240-13	Hymenoptera	Platygastridae	Family	BOLD:ACI4135	3
													GMGRE028-13	Hymenoptera	Megaspilidae	Family	BOLD:ACI4136	2
													GMGRF6261-13	Hymenoptera	Diapriidae	Family	BOLD:ACI4172	5
													GMGRE3486-13	Hymenoptera	Diapriidae	Family	BOLD:ACI4375	2
													GMGRE3529-13	Hymenoptera	Diapriidae	Family	BOLD:ACI4376	6
													GMGRD2907-13	Hymenoptera	Platygastridae	Family	BOLD:ACI4511	2
													GMGRD2928-13	Hymenoptera	Pteromalidae	Family	BOLD:ACI4514	4
													GMGRD3217-13	Hymenoptera	Diapriidae	Family	BOLD:ACI4524	2
													GMGRD1703-13	Hymenoptera	Platygastridae	Family	BOLD:ACI4525	2
													GMGRD3201-13	Hymenoptera	Braconidae	Family	BOLD:ACI4526	3
													GMGRD3203-13	Hymenoptera	Diapriidae	Family	BOLD:ACI4528	2
													GMGRD2903-13	Hymenoptera	Platygastridae	Family	BOLD:ACI4529	4
													GMGRE3564-13	Hymenoptera	Megaspilidae	Family	BOLD:ACI4646	3
													GMGRE3324-13	Hymenoptera	Mymaridae	Family	BOLD:ACI4647	2
													GMGRD2931-13	Hymenoptera	Diapriidae	Family	BOLD:ACI4657	1
													GMGRG4521-13	Hymenoptera	Trichogrammatidae	Family	BOLD:ACI4758	6
													GMGRE3477-13	Hymenoptera	Diapriidae	Family	BOLD:ACI4762	5
													GMGRE3353-13	Hymenoptera	Platygastridae	Family	BOLD:ACI4763	7
													GMGRD1762-13	Hymenoptera	Megaspilidae	Family	BOLD:ACI4868	10
													GMGRE3356-13	Hymenoptera	Platygastridae	Family	BOLD:ACI5000	2
													GMGRE3528-13	Hymenoptera	Diapriidae	Family	BOLD:ACI5003	9
													GMGRC3056-13	Hymenoptera	Ichneumonidae	Family	BOLD:ACI5166	3
													GMGMI1412-14	Hymenoptera	Cryptinae	Family	BOLD:ACI7190	10
													GMGRF588-13	Hymenoptera	Eulophidae	Family	BOLD:ACI7285	2
													GMGML1513-14	Hymenoptera	Eurytomidae	Family	BOLD:ACI7299	3
													GMGMN510-14	Hymenoptera	Eurytomidae	Family	BOLD:ACI7300	8
													GMGRE728-13	Hymenoptera	Diapriidae	Family	BOLD:ACI8532	5
													GMGRG1145-13	Hymenoptera	Pteromalidae	Family	BOLD:ACI8541	5
													GMGRG4322-13	Hymenoptera	Platygastridae	Family	BOLD:ACI8542	40
													GMGRF4457-13	Hymenoptera	Platygastridae	Family	BOLD:ACI8613	2
													GMGRF1901-13	Hymenoptera	Platygastridae	Family	BOLD:ACI8691	4
													GMGRF4550-13	Hymenoptera	Pteromalidae	Family	BOLD:ACI8743	6
													GMGRF1936-13	Hymenoptera	Braconidae	Family	BOLD:ACI8778	4
													GMGRF4512-13	Hymenoptera	Ichneumonidae	Family	BOLD:ACI8802	2
													GMGMC429-14	Hymenoptera	Platygastridae	Family	BOLD:ACI8893	2
													GMGRF1980-13	Hymenoptera	Figitidae	Family	BOLD:ACI8894	11
													GMGRF4461-13	Hymenoptera	Braconidae	Family	BOLD:ACI8920	2
													GMGRF1993-13	Hymenoptera	Eulophidae	Family	BOLD:ACI8935	31
													GMGRF4359-13	Hymenoptera	Platygastridae	Family	BOLD:ACI8952	3
													GMGRF4365-13	Hymenoptera	Platygastridae	Family	BOLD:ACI8953	2
													GMGRF967-13	Hymenoptera	Scelioninae	Family	BOLD:ACI8975	2
													GMGRF5377-13	Hymenoptera	Scelioninae	Family	BOLD:ACI8993	12
													GMGRF1989-13	Hymenoptera	Megaspilidae	Family	BOLD:ACI9014	9
													GMGRF1974-13	Hymenoptera	Proctotrupidae	Family	BOLD:ACI9017	1
													GMGMC966-14	Hymenoptera	Pteromalidae	Family	BOLD:ACI9027	58
													GMGRG1092-13	Hymenoptera	Braconidae	Family	BOLD:ACI9041	8
													GMGRF957-13	Hymenoptera	Eulophidae	Family	BOLD:ACI9052	2
													GMGRF4397-13	Hymenoptera	Platygastridae	Family	BOLD:ACI9127	5
													GMGRF622-13	Hymenoptera	Platygastridae	Family	BOLD:ACI9148	3
													GMGRF6321-13	Hymenoptera	Platygastridae	Family	BOLD:ACI9179	7
													GMGRF5462-13	Hymenoptera	Diapriidae	Family	BOLD:ACI9721	2
													GMGRF4493-13	Hymenoptera	Platygastridae	Family	BOLD:ACJ0373	3
													GMGRF1036-13	Hymenoptera	Diapriidae	Family	BOLD:ACJ0375	2
													GMGRG4316-13	Hymenoptera	Mymaridae	Family	BOLD:ACJ0404	10
													GMGRF4443-13	Hymenoptera	Diapriidae	Family	BOLD:ACJ0448	4
													GMGRD2886-13	Hymenoptera	Megaspilidae	Family	BOLD:ACJ0595	3
													GMGRF3331-13	Hymenoptera	Pteromalidae	Family	BOLD:ACJ0607	2
													GMGRG4253-13	Hymenoptera	Diapriidae	Family	BOLD:ACJ0885	13
													GMGRF3361-13	Hymenoptera	Eulophidae	Family	BOLD:ACJ0897	7
													GMGRF4364-13	Hymenoptera	Megaspilidae	Family	BOLD:ACJ0901	4
													GMGRG4331-13	Hymenoptera	Platygastridae	Family	BOLD:ACJ0902	11
													GMGRF592-13	Hymenoptera	Platygastridae	Family	BOLD:ACJ0940	4
													GMGMN529-14	Hymenoptera	Cheloninae	Family	BOLD:ACJ0960	7
													GMGRF6298-13	Hymenoptera	Megaspilidae	Family	BOLD:ACJ1039	3
													GMGRG4400-13	Hymenoptera	Pteromalidae	Family	BOLD:ACJ2622	5
													GMGRG4503-13	Hymenoptera	Braconidae	Family	BOLD:ACJ2623	3
													GMGRG4336-13	Hymenoptera	Platygastridae	Family	BOLD:ACJ2664	7
													GMGRG4386-13	Hymenoptera	Platygastridae	Family	BOLD:ACJ2665	42
													GMGRG4481-13	Hymenoptera	Trichogrammatidae	Family	BOLD:ACJ2783	1
													GMGRG4474-13	Hymenoptera	Mymaridae	Family	BOLD:ACJ2833	2
													GMGRE2230-13	Hymenoptera	Eulophidae	Family	BOLD:ACJ2893	2
													GMGRG4328-13	Hymenoptera	Platygastridae	Family	BOLD:ACJ2962	15
													GMGRG4456-13	Hymenoptera	Figitidae	Family	BOLD:ACJ2976	17
													GMGRG4165-13	Hymenoptera	Braconidae	Family	BOLD:ACJ3035	2
													GMGRG4163-13	Hymenoptera	Eulophidae	Family	BOLD:ACJ3068	1
													GMGML1234-14	Hymenoptera	Campopleginae	Family	BOLD:ACJ3380	3
													GMGRG4248-13	Hymenoptera	Platygastridae	Family	BOLD:ACJ3448	2
													GMGRG4225-13	Hymenoptera	Braconidae	Family	BOLD:ACJ3449	2
													GMGMN622-14	Hymenoptera	Eulophidae	Family	BOLD:ACJ3521	5
													GMGRH2634-13	Hymenoptera	Platygastridae	Family	BOLD:ACJ7394	5
													GMGRH2664-13	Hymenoptera	Braconidae	Family	BOLD:ACJ7483	3
													GMGRH2614-13	Hymenoptera	Scelioninae	Family	BOLD:ACJ7645	15
													GMGRH2633-13	Hymenoptera	Platygastridae	Family	BOLD:ACJ7736	3
													GMGRH2618-13	Hymenoptera	Platygastridae	Family	BOLD:ACJ7773	3
													GMGRH2620-13	Hymenoptera	Eulophidae	Family	BOLD:ACJ7812	2
													GMGRH138-13	Hymenoptera	Pteromalidae	Family	BOLD:ACJ7843	3
													GMGRG4466-13	Hymenoptera	Diapriidae	Family	BOLD:ACJ7867	3
													GMGRD2934-13	Hymenoptera	Diapriidae	Family	BOLD:ACJ8038	5
													GMGRE732-13	Hymenoptera	Hymenoptera	Family	BOLD:ACK1676	4
													GMGRG1148-13	Hymenoptera	Eulophidae	Family	BOLD:ACL5296	2
													GMGRD3214-13	Hymenoptera	Diapriidae	Family	BOLD:ACM1000	28
													GMGRD2869-13	Hymenoptera	Scelioninae	Family	BOLD:ACM1034	2
													GMGRE721-13	Hymenoptera	Tetrastichinae	Family	BOLD:ACM7965	2
													GMGRG4366-13	Hymenoptera	Platygastridae	Family	BOLD:ACN7725	32
													GMGRF4484-13	Hymenoptera	Platygastridae	Family	BOLD:ACN8486	2
													GMGMM706-14	Hymenoptera	Doryctinae	Family	BOLD:ACO1181	4
													GMGMM955-14	Hymenoptera	Microgastrinae	Family	BOLD:ACO3086	4
													GMGRF1945-13	Hymenoptera	Megaspilidae	Family	BOLD:ACO4430	6
													GMGMI1380-14	Hymenoptera	Alysiinae	Family	BOLD:ACO9220	11
													GMGMC415-14	Hymenoptera	Platygastridae	Family	BOLD:ACP0453	3
													GMGMB1407-14	Hymenoptera	Campopleginae	Family	BOLD:ACP1357	5
													GMGMA1201-14	Hymenoptera	Ichneumonidae	Family	BOLD:ACP2839	6
													GMGMK698-14	Hymenoptera	Alysiinae	Family	BOLD:ACP3635	2
													GMGMD589-14	Hymenoptera	Ichneumonidae	Family	BOLD:ACP3788	2
													GMGMA125-14	Hymenoptera	Platygastridae	Family	BOLD:ACP3935	4
													GMGMA1086-14	Hymenoptera	Torymidae	Family	BOLD:ACP4248	2
													GMGMA753-14	Hymenoptera	Ichneumonidae	Family	BOLD:ACP4394	5
													GMGML691-14	Hymenoptera	Platygastridae	Family	BOLD:ACP4423	9
													GMGMN851-14	Hymenoptera	Braconidae	Family	BOLD:ACP4544	4
													GMGMM953-14	Hymenoptera	Ichneumonidae	Family	BOLD:ACP4639	3
													GMGMD481-14	Hymenoptera	Bethylidae	Family	BOLD:ACP4729	50
													GMGMI454-14	Hymenoptera	Ichneumonidae	Family	BOLD:ACP4746	3
													GMGMD1192-14	Hymenoptera	Platygastridae	Family	BOLD:ACP5057	11
													GMGMA1234-14	Hymenoptera	Braconidae	Family	BOLD:ACP5304	7
													GMGMI579-14	Hymenoptera	Ichneumonidae	Family	BOLD:ACP6036	9
													GMGMI640-14	Hymenoptera	Ichneumonidae	Family	BOLD:ACP6765	2
													GMGRG4233-13	Hymenoptera	Entedoninae	Family	BOLD:ACP7003	2
													GMGMN858-14	Hymenoptera	Diapriidae	Family	BOLD:ACP7578	3
													GMGMI615-14	Hymenoptera	Tryphoninae	Family	BOLD:ACP7621	7
													GMGMM1068-14	Hymenoptera	Tryphoninae	Family	BOLD:ACP7712	6
													GMGMI875-14	Hymenoptera	Ichneumonidae	Family	BOLD:ACP7866	2
													GMGMA746-14	Hymenoptera	Cryptinae	Family	BOLD:ACP8108	6
													GMGML926-14	Hymenoptera	Alysiinae	Family	BOLD:ACP8231	4
													GMGML1565-14	Hymenoptera	Tryphoninae	Family	BOLD:ACP9252	11
													GMGMN486-14	Hymenoptera	Metopiinae	Family	BOLD:ACP9529	2
													GMGML1482-14	Hymenoptera	Orthocentrinae	Family	BOLD:ACP9628	3
													GMGMN1206-14	Hymenoptera	Eulophidae	Family	BOLD:ACP9741	4
													GMGML1448-14	Hymenoptera	Ichneumoninae	Family	BOLD:ACQ6951	3
													GMGMA437-14	Hymenoptera	Ichneumonidae	Family	BOLD:ACQ8505	3
													GMGMA1214-14	Hymenoptera	Pteromalidae	Family	BOLD:ACQ8510	4
													GMGMM417-14	Hymenoptera	Ichneumonidae	Family	BOLD:ACQ8576	6
													GMGMB814-14	Hymenoptera	Braconidae	Family	BOLD:ACQ8597	3
													GMGMC1350-14	Hymenoptera	Eurytominae	Family	BOLD:ACQ8741	22
													GMGMA1477-14	Hymenoptera	Braconidae	Family	BOLD:ACQ8773	3
													GMGMN541-14	Hymenoptera	Pteromalidae	Family	BOLD:ACQ8790	3
													GMGMA403-14	Hymenoptera	Ichneumonidae	Family	BOLD:ACQ8883	10
													GMGMA1088-14	Hymenoptera	Ichneumonidae	Family	BOLD:ACQ9077	11
													GMGMA1221-14	Hymenoptera	Braconidae	Family	BOLD:ACQ9255	6
													GMGMA693-14	Hymenoptera	Ichneumonidae	Family	BOLD:ACQ9287	6
													GMGMN504-14	Hymenoptera	Ichneumonidae	Family	BOLD:ACQ9327	12
													GMGMD314-14	Hymenoptera	Ichneumonidae	Family	BOLD:ACQ9540	6
													GMGMM874-14	Hymenoptera	Ichneumonidae	Family	BOLD:ACQ9869	2
													GMGMA1101-14	Hymenoptera	Ichneumonidae	Family	BOLD:ACQ9871	22
													GMGMA991-14	Hymenoptera	Campopleginae	Family	BOLD:ACQ9972	4
													GMGMB608-14	Hymenoptera	Campopleginae	Family	BOLD:ACQ9992	3
													GMGMA692-14	Hymenoptera	Ichneumonidae	Family	BOLD:ACR0029	8
													GMGMD593-14	Hymenoptera	Braconidae	Family	BOLD:ACR0079	9
													GMGMM728-14	Hymenoptera	Ichneumonidae	Family	BOLD:ACR0133	4
													GMGMM1043-14	Hymenoptera	Ichneumonidae	Family	BOLD:ACR0245	6
													GMGMC1058-14	Hymenoptera	Alysiinae	Family	BOLD:ACR0288	2
													GMGMC699-14	Hymenoptera	Ichneumonidae	Family	BOLD:ACR0446	2
													GMGMA1132-14	Hymenoptera	Campopleginae	Family	BOLD:ACR0658	2
													GMGMA1029-14	Hymenoptera	Campopleginae	Family	BOLD:ACR0812	5
													GMGMA686-14	Hymenoptera	Ichneumoninae	Family	BOLD:ACR0860	20
													GMGMD556-14	Hymenoptera	Microgastrinae	Family	BOLD:ACR0903	2
													GMGMA684-14	Hymenoptera	Ichneumonidae	Family	BOLD:ACR0910	7
													GMGMC926-14	Hymenoptera	Tersilochinae	Family	BOLD:ACR0944	4
													GMGMD454-14	Hymenoptera	Ichneumonidae	Family	BOLD:ACR0969	6
													GMGMD530-14	Hymenoptera	Ichneumonidae	Family	BOLD:ACR0970	5
													GMGMC885-14	Hymenoptera	Eurytomidae	Family	BOLD:ACR0982	3
													GMGRF1978-13	Hymenoptera	Eulophidae	Family	BOLD:ACR1932	5
													GMGML710-14	Hymenoptera	Braconidae	Family	BOLD:ACR2049	2
													GMGMI868-14	Hymenoptera	Ctenopelmatinae	Family	BOLD:ACR2221	2
													GMGMI1381-14	Hymenoptera	Diapriidae	Family	BOLD:ACR2222	2
													GMGML368-14	Hymenoptera	Campopleginae	Family	BOLD:ACR2408	5
													GMGMI1383-14	Hymenoptera	Ichneumonidae	Family	BOLD:ACR2460	2
													GMGMI1403-14	Hymenoptera	Ichneumoninae	Family	BOLD:ACR2462	3
													GMGMJ1411-14	Hymenoptera	Ichneumonidae	Family	BOLD:ACR2473	2
													GMGMM689-14	Hymenoptera	Ichneumonidae	Family	BOLD:ACR2657	5
													GMGMK489-14	Hymenoptera	Ichneumonidae	Family	BOLD:ACR2730	7
													GMGMI617-14	Hymenoptera	Braconidae	Family	BOLD:ACR3072	2
													GMGMD1131-14	Hymenoptera	Alysiinae	Family	BOLD:ACR3082	2
													GMGMI477-14	Hymenoptera	Ichneumonidae	Family	BOLD:ACR3168	7
													GMGMD1140-14	Hymenoptera	Campopleginae	Family	BOLD:ACR3221	2
													GMGMK756-14	Hymenoptera	Ichneumonidae	Family	BOLD:ACR3227	2
													GMGMB511-14	Hymenoptera	Ichneumonidae	Family	BOLD:ACR3409	4
													GMGMK764-14	Hymenoptera	Ichneumonidae	Family	BOLD:ACR3466	2
													GMGMI1373-14	Hymenoptera	Ichneumonidae	Family	BOLD:ACR3685	5
													GMGMM1085-14	Hymenoptera	Ichneumonidae	Family	BOLD:ACR3721	9
													GMGMJ1286-14	Hymenoptera	Ichneumonidae	Family	BOLD:ACR3745	2
													GMGMJ1251-14	Hymenoptera	Diapriidae	Family	BOLD:ACR3837	5
													GMGMK821-14	Hymenoptera	Ichneumonidae	Family	BOLD:ACR3874	3
													GMGML1437-14	Hymenoptera	Ichneumonidae	Family	BOLD:ACR3936	3
													GMGML983-14	Hymenoptera	Campopleginae	Family	BOLD:ACR3984	2
													GMGML1536-14	Hymenoptera	Ichneumonidae	Family	BOLD:ACR4047	2
													GMGMJ1243-14	Hymenoptera	Braconidae	Family	BOLD:ACR4104	2
													GMGML1431-14	Hymenoptera	Ichneumoninae	Family	BOLD:ACR4139	4
													GMGMD1518-14	Hymenoptera	Alysiinae	Family	BOLD:ACR4262	4
													GMGMJ1322-14	Hymenoptera	Ichneumonidae	Family	BOLD:ACR4263	2
													GMGMJ1419-14	Hymenoptera	Ichneumonidae	Family	BOLD:ACR4347	2
													GMGML1518-14	Hymenoptera	Diapriidae	Family	BOLD:ACR4507	2
													GMGML627-14	Hymenoptera	Braconidae	Family	BOLD:ACR4539	2
													GMGML697-14	Hymenoptera	Alysiinae	Family	BOLD:ACR4572	8
													GMGML689-14	Hymenoptera	Ichneumonidae	Family	BOLD:ACR4609	2
													GMGMD474-14	Hymenoptera	Eurytomidae	Family	BOLD:ACR4636	3
													GMGMA701-14	Hymenoptera	Ichneumonidae	Family	BOLD:ACR4651	29
													GMGMK1460-14	Hymenoptera	Alysiinae	Family	BOLD:ACR4663	2
													GMGMD1533-14	Hymenoptera	Braconidae	Family	BOLD:ACR4669	3
													GMGMM734-14	Hymenoptera	Ichneumonidae	Family	BOLD:ACR4716	3
													GMGMK823-14	Hymenoptera	Campopleginae	Family	BOLD:ACR4810	3
													GMGML1562-14	Hymenoptera	Braconidae	Family	BOLD:ACR4938	2
													GMGMN178-14	Hymenoptera	Ichneumonidae	Family	BOLD:ACR4969	5
													GMGMM682-14	Hymenoptera	Ichneumonidae	Family	BOLD:ACR5067	2
													GMGMM720-14	Hymenoptera	Ichneumonidae	Family	BOLD:ACR5178	2
													GMGMM902-14	Hymenoptera	Diapriidae	Family	BOLD:ACR5407	1
													GMGMN1318-14	Hymenoptera	Ichneumonidae	Family	BOLD:ACR5487	2
													GMGMN907-14	Hymenoptera	Ichneumoninae	Family	BOLD:ACR7046	2
													GMGMN516-14	Hymenoptera	Eulophidae	Family	BOLD:ACR7108	3
													GMGRC942-13	Hymenoptera	Braconidae	Family	BOLD:ACT7856	3
													GMGMN869-14	Hymenoptera	Campopleginae	Family	BOLD:ACU0940	3
													GMGRC966-13	Hymenoptera	Platygastridae	Family	BOLD:ACU1139	5
													GMGRD1708-13	Hymenoptera	Figitidae	Family	BOLD:ACU1206	2
													GMGML1490-14	Hymenoptera	Alysiinae	Family	BOLD:ACU1433	3
													GMGMJ1453-14	Hymenoptera	Alysiinae	Family	BOLD:ACU2139	2
													GMGRH1898-13	Mesostigmata	Ascidae	Family	BOLD:AAH6490	10
													GMGRC2729-13	Mesostigmata	Microgyniidae	Family	BOLD:ACC7936	8
													GMGRA1384-13	Mesostigmata	Digamasellidae	Family	BOLD:ACC8566	7
													GMGRB1110-13	Mesostigmata	Parasitidae	Family	BOLD:ACF6329	2
													GMGRH2690-13	Mesostigmata	Ascidae	Family	BOLD:ACF7352	2
													GMGMK1524-14	Mesostigmata	Parasitidae	Family	BOLD:ACF8205	18
													GMGRB2036-13	Mesostigmata	Digamasellidae	Family	BOLD:ACF8577	20
													GMGRB1111-13	Mesostigmata	Digamasellidae	Family	BOLD:ACF8578	3
													GMGRD1801-13	Mesostigmata	Parasitidae	Family	BOLD:ACG5107	9
													GMGRD1814-13	Mesostigmata	Laelapidae	Family	BOLD:ACG5152	3
													GMGRG3934-13	Mesostigmata	Phytoseiidae	Family	BOLD:ACJ4882	26
													GMGRI848-13	Mesostigmata	Parasitidae	Family	BOLD:ACJ9095	3
													GMGRG3919-13	Mesostigmata	Laelapidae	Family	BOLD:ACO0441	38
													GMGML1082-14	Mesostigmata	Parasitidae	Family	BOLD:ACR3407	3
													GMGRF5480-13	Sarcoptiformes	Ceratozetidae	Family	BOLD:ACC6079	80
													GMGRC2176-13	Thysanoptera	Phlaeothripidae	Family	BOLD:ABY1863	5
													GMGRF5312-13	Thysanoptera	Phlaeothripidae	Family	BOLD:ACD0145	10
													GMGRC2865-13	Thysanoptera	Thripidae	Family	BOLD:ACG4914	4
													GMGRA1375-13	Trombidiformes	Anystidae	Family	BOLD:AAF9236	605
													GMGRD1837-13	Trombidiformes	Hygrobatidae	Family	BOLD:ACG4776	4
													GMGRF5508-13	Trombidiformes	Erythraeidae	Family	BOLD:ACJ5086	7
													GMGRD1796-13	Trombidiformes	Anystidae	Family	BOLD:ACM6751	3
													GMGML1080-14	Trombidiformes	Erythraeidae	Family	BOLD:ACR4310	7
													GMGMJ1492-14	Trombidiformes	Pygmephoridae	Family	BOLD:ACR4641	2
													GMGMH811-14	#N/A	Sphaeroceridae	Family	BOLD:AAG7028	51
													GMGMF1271-14	#N/A	Limosininae	Family	BOLD:AAG7281	11
													GMGME080-14	#N/A	Cecidomyiidae	Family	BOLD:AAH3617	791
													GMGMG1000-14	#N/A	Cecidomyiidae	Family	BOLD:AAH3641	16
													GMGME1283-14	#N/A	Cecidomyiidae	Family	BOLD:AAL7438	114
													GMGME1402-14	#N/A	Sciaridae	Family	BOLD:AAN6444	157
													GMGMF1089-14	#N/A	Ascidae	Family	BOLD:AAN6706	57
													GMGMF362-14	#N/A	Mycetophilinae	Family	BOLD:AAY6371	7
													GMGMG766-14	#N/A	Phoridae	Family	BOLD:ACC5625	70
													GMGMH1062-14	#N/A	Ceratopogonidae	Family	BOLD:ACE0463	4
													GMGMG964-14	#N/A	Phoridae	Family	BOLD:ACE2214	67
													GMGME1195-14	#N/A	Cecidomyiidae	Family	BOLD:ACE8241	49
													GMGME610-14	#N/A	Phoridae	Family	BOLD:ACF7863	4
													GMGMF494-14	#N/A	Phoridae	Family	BOLD:ACF8062	182
													GMGMH834-14	#N/A	Sciaridae	Family	BOLD:ACF8967	15
													GMGME1398-14	#N/A	Cecidomyiidae	Family	BOLD:ACG3506	2
													GMGME729-14	#N/A	Cecidomyiidae	Family	BOLD:ACG4457	8
													GMGMH918-14	#N/A	Diapriidae	Family	BOLD:ACG5663	6
													GMGME884-14	#N/A	Dolichopodidae	Family	BOLD:ACH2821	95
													GMGME334-14	#N/A	Ichneumonidae	Family	BOLD:ACI4374	8
													GMGMG1181-14	#N/A	Cicadellidae	Family	BOLD:ACI5825	255
													GMGME1412-14	#N/A	Cecidomyiidae	Family	BOLD:ACI8025	5
													GMGMH1010-14	#N/A	Cecidomyiidae	Family	BOLD:ACI8196	79
													GMGMF462-14	#N/A	Mycetophilidae	Family	BOLD:ACJ2631	5
													GMGME724-14	#N/A	Empididae	Family	BOLD:ACJ2674	12
													GMGME1265-14	#N/A	Cecidomyiidae	Family	BOLD:ACJ3318	24
													GMGME1476-14	#N/A	Cecidomyiidae	Family	BOLD:ACJ5535	2
													GMGME675-14	#N/A	Empididae	Family	BOLD:ACJ5539	7
													GMGMH1064-14	#N/A	Cecidomyiidae	Family	BOLD:ACO3071	5
													GMGMH801-14	#N/A	Agromyzidae	Family	BOLD:ACO7776	8
													GMGME1388-14	#N/A	Chloropidae	Family	BOLD:ACP3406	30
													GMGMH989-14	#N/A	Cecidomyiidae	Family	BOLD:ACP8091	6
													GMGMH953-14	#N/A	Mycetophilinae	Family	BOLD:ACP8177	4
													GMGMF311-14	#N/A	Mycetophilinae	Family	BOLD:ACQ8258	11
													GMGME732-14	#N/A	Mycetophilinae	Family	BOLD:ACQ8661	3
													GMGMH961-14	#N/A	Phoridae	Family	BOLD:ACQ8797	8
													GMGMF352-14	#N/A	Phoridae	Family	BOLD:ACQ8905	59
													GMGMH183-14	#N/A	Phoridae	Family	BOLD:ACQ9825	2
													GMGME668-14	#N/A	Sciaridae	Family	BOLD:ACQ9855	10
													GMGME715-14	#N/A	Chironomidae	Family	BOLD:ACQ9937	6
													GMGMF507-14	#N/A	Chironomidae	Family	BOLD:ACR0587	42
													GMGME371-14	#N/A	Ichneumonidae	Family	BOLD:ACR1016	3
													GMGMH932-14	#N/A	Chironomidae	Family	BOLD:ACR1089	3
													GMGMH949-14	#N/A	Phoridae	Family	BOLD:ACR1140	5
													GMGMH177-14	#N/A	Mycetophilidae	Family	BOLD:ACR1239	22
													GMGME1201-14	#N/A	Chloropidae	Family	BOLD:ACR1373	2
													GMGME1373-14	#N/A	Milichiidae	Family	BOLD:ACR1459	2
													GMGME034-14	#N/A	Lauxaniidae	Family	BOLD:ACR1561	10
													GMGMH216-14	#N/A	Empidinae	Family	BOLD:ACR1843	8
													GMGMH207-14	#N/A	Phoridae	Family	BOLD:ACR1992	29
													GMGMH298-14	#N/A	Dryomyzidae	Family	BOLD:ACR2013	64
													GMGMG179-14	#N/A	Heleomyzidae	Family	BOLD:ACR2015	3
													GMGMH828-14	#N/A	Ceratopogonidae	Family	BOLD:ACR2180	2
													GMGMH1069-14	#N/A	Dolichopodidae	Family	BOLD:ACR2315	4
													GMGMH214-14	#N/A	Empididae	Family	BOLD:ACR2350	12
													GMGMH840-14	#N/A	Ichneumonidae	Family	BOLD:ACR2590	3
													GMGME1595-14	#N/A	Cicadellidae	Family	BOLD:ACR2596	4
													GMGMH638-14	#N/A	Campopleginae	Family	BOLD:ACR3034	6
													GMGMH436-14	#N/A	Ichneumoninae	Family	BOLD:ACR3137	3
													GMGMH1572-14	#N/A	Scarabaeidae	Family	BOLD:ACR3289	19
													GMGMH1090-14	#N/A	Empididae	Family	BOLD:ACR3468	2
													GMGMH767-14	#N/A	Chironomidae	Family	BOLD:ACR3552	6
													GMGMH757-14	#N/A	Agromyzidae	Family	BOLD:ACR3681	2
													GMGMH1088-14	#N/A	Agromyzidae	Family	BOLD:ACR3764	12
													GMGME565-14	#N/A	Chironomidae	Family	BOLD:ACR3766	12
													GMGME899-14	#N/A	Cecidomyiidae	Family	BOLD:ACR4037	3
													GMGRD1570-13	Araneae	Entelecara	Genus	BOLD:ACG5060	2
													GMGMA572-14	Coleoptera	Lagria	Genus	BOLD:ACQ8736	2
													GMGML607-14	Diptera	Psila	Genus	BOLD:AAF9710	7
													GMGML1394-14	Diptera	Cylindromyia	Genus	BOLD:AAG2137	11
													GMGRE570-13	Diptera	Megaselia	Genus	BOLD:AAG3255	265
													GMGRG708-13	Diptera	Megaselia	Genus	BOLD:AAG3266	4043
													GMGRG4612-13	Diptera	Ceratopogonidae	Genus	BOLD:AAG6433	56
													GMGRG1002-13	Diptera	Chamaemyiidae	Genus	BOLD:AAG6951	81
													GMGRA235-13	Diptera	Tavastia	Genus	BOLD:AAH2947	14
													GMGRF4069-13	Diptera	Hydrosmittia	Genus	BOLD:AAH3024	6
													GMGRA092-13	Diptera	Scatopsciara	Genus	BOLD:AAH4004	6
													GMGRC2296-13	Diptera	Gymnometriocnemus	Genus	BOLD:AAI4193	688
													GMGRD3137-13	Diptera	Gymnometriocnemus	Genus	BOLD:AAI4195	426
													GMGRD1592-13	Diptera	Dorylomorpha	Genus	BOLD:AAI6128	7
													GMGRF2818-13	Diptera	Anthomyiidae	Genus	BOLD:AAL8103	284
													GMGRD2511-13	Diptera	Pseudosmittia	Genus	BOLD:AAM6263	338
													GMGRD1178-13	Diptera	Corynoptera	Genus	BOLD:AAM9224	69
													GMGMI492-14	Diptera	Dasyhelea	Genus	BOLD:AAN5169	158
													GMGRF4090-13	Diptera	Tanytarsus	Genus	BOLD:AAP5875	2
													GMGMC1066-14	Diptera	Parametriocnemus	Genus	BOLD:AAP6587	2
													GMGMC348-14	Diptera	Stegana	Genus	BOLD:AAP8169	12
													GMGRF1357-13	Diptera	Megaselia	Genus	BOLD:AAP9862	8
													GMGRE3620-13	Diptera	Bradysia	Genus	BOLD:AAP9903	613
													GMGMC1593-14	Diptera	Asteromyia	Genus	BOLD:AAV5552	137
													GMGRA615-13	Diptera	Megaselia	Genus	BOLD:ABA7000	5
													GMGRG4072-13	Diptera	Clytocerus	Genus	BOLD:ABA8472	13
													GMGRH1105-13	Diptera	Limnophyes	Genus	BOLD:ABV1190	26
													GMGRF3935-13	Diptera	Pseudorthocladius	Genus	BOLD:ABV3504	17
													GMGMB937-14	Diptera	Limnophyes	Genus	BOLD:ABW5528	196
													GMGMI1236-14	Diptera	Schoenomyza	Genus	BOLD:ABW5574	5
													GMGRI133-13	Diptera	Phytoliriomyza	Genus	BOLD:ABX2113	20
													GMGRF3662-13	Diptera	Liriomyza	Genus	BOLD:ABX2155	41
													GMGMB972-14	Diptera	Atrichopogon	Genus	BOLD:ACA3626	25
													GMGRA1110-13	Diptera	Scatopsciara	Genus	BOLD:ACA8369	42
													GMGRH828-13	Diptera	Megaselia	Genus	BOLD:ACB0989	120
													GMGMI1513-14	Diptera	Contarinia	Genus	BOLD:ACB8904	24
													GMGMC1209-14	Diptera	Fannia	Genus	BOLD:ACB9826	27
													GMGRB845-13	Diptera	Corynoptera	Genus	BOLD:ACC0407	28
													GMGMD723-14	Diptera	Forcipomyiinae	Genus	BOLD:ACC1669	52
													GMGRI450-13	Diptera	Megaselia	Genus	BOLD:ACC1682	3
													GMGRH2424-13	Diptera	Ceratopogonidae	Genus	BOLD:ACC5339	25
													GMGRG2172-13	Diptera	Megaselia	Genus	BOLD:ACC5402	5
													GMGRG4567-13	Diptera	Corynoptera	Genus	BOLD:ACC5408	3
													GMGMJ360-14	Diptera	Pegoplata	Genus	BOLD:ACC6060	7
													GMGRD1975-13	Diptera	Mycomya	Genus	BOLD:ACC6515	4
													GMGRD3287-13	Diptera	Megaselia	Genus	BOLD:ACD0836	68
													GMGRA041-13	Diptera	Gymnometriocnemus	Genus	BOLD:ACD9477	36
													GMGMC860-14	Diptera	Voria	Genus	BOLD:ACD9482	2
													GMGRA303-13	Diptera	Pseudorthocladius	Genus	BOLD:ACD9519	5
													GMGMD704-14	Diptera	Bradysia	Genus	BOLD:ACD9543	87
													GMGRA1217-13	Diptera	Bradysia	Genus	BOLD:ACD9583	3
													GMGRA1201-13	Diptera	Megaselia	Genus	BOLD:ACD9634	29
													GMGRA1265-13	Diptera	Cordyla	Genus	BOLD:ACD9635	16
													GMGRA1227-13	Diptera	Gymnometriocnemus	Genus	BOLD:ACE0146	17
													GMGRA535-13	Diptera	Thaumatomyia	Genus	BOLD:ACE0352	4
													GMGRA154-13	Diptera	Corynoptera	Genus	BOLD:ACE0435	2
													GMGRA217-13	Diptera	Bradysia	Genus	BOLD:ACE0515	5
													GMGRA067-13	Diptera	Orthocladius	Genus	BOLD:ACE0526	7
													GMGRA262-13	Diptera	Cratyna	Genus	BOLD:ACE0581	2
													GMGMB894-14	Diptera	Eudorylas	Genus	BOLD:ACE1834	10
													GMGRF2689-13	Diptera	Scathophaga	Genus	BOLD:ACF6040	2
													GMGRC2545-13	Diptera	Gymnometriocnemus	Genus	BOLD:ACF6807	4
													GMGRD1607-13	Diptera	Corynoptera	Genus	BOLD:ACF6941	7
													GMGMD713-14	Diptera	Cerodontha	Genus	BOLD:ACF7184	12
													GMGRB087-13	Diptera	Smittia	Genus	BOLD:ACF7218	12
													GMGRB251-13	Diptera	Rhamphomyia	Genus	BOLD:ACF7219	2
													GMGRC658-13	Diptera	Cratyna	Genus	BOLD:ACF7262	13
													GMGRC2815-13	Diptera	Epidapus	Genus	BOLD:ACF7765	25
													GMGRC1464-13	Diptera	Corynoneura	Genus	BOLD:ACF8304	4
													GMGRC1337-13	Diptera	Forcipomyia	Genus	BOLD:ACF8504	7
													GMGRB1263-13	Diptera	Paraphaenocladius	Genus	BOLD:ACF8768	6
													GMGRC1885-13	Diptera	Pseudolycoriella	Genus	BOLD:ACF9727	3
													GMGRD2356-13	Diptera	Psychoda	Genus	BOLD:ACG3215	3
													GMGRD1919-13	Diptera	Megaselia	Genus	BOLD:ACG3262	2
													GMGRD114-13	Diptera	Cratyna	Genus	BOLD:ACG3272	4
													GMGRC2614-13	Diptera	Mycomya	Genus	BOLD:ACG3392	2
													GMGRD1440-13	Diptera	Fannia	Genus	BOLD:ACG3524	5
													GMGRD1434-13	Diptera	Corynoneura	Genus	BOLD:ACG3525	2
													GMGRC195-13	Diptera	Mycetophila	Genus	BOLD:ACG3655	2
													GMGRD059-13	Diptera	Neophyllomyza	Genus	BOLD:ACG4003	9
													GMGRD046-13	Diptera	Neophyllomyza	Genus	BOLD:ACG4021	5
													GMGRD838-13	Diptera	Chalarus	Genus	BOLD:ACG4022	3
													GMGRD812-13	Diptera	Gaurax	Genus	BOLD:ACG4214	9
													GMGRD321-13	Diptera	Eudorylas	Genus	BOLD:ACG4298	4
													GMGRD805-13	Diptera	Chaetocladius	Genus	BOLD:ACG4647	6
													GMGRE548-13	Diptera	Megaselia	Genus	BOLD:ACG5397	8
													GMGRE596-13	Diptera	Mycetophilidae	Genus	BOLD:ACG5496	8
													GMGMI688-14	Diptera	Phytomyza	Genus	BOLD:ACG5827	18
													GMGRE468-13	Diptera	Dasydorylas	Genus	BOLD:ACG6159	2
													GMGRE506-13	Diptera	Rheotanytarsus	Genus	BOLD:ACG6176	2
													GMGRE1282-13	Diptera	Pseudosmittia	Genus	BOLD:ACG7714	236
													GMGRE2151-13	Diptera	Pseudosmittia	Genus	BOLD:ACG8007	3
													GMGRE1702-13	Diptera	Pseudosmittia	Genus	BOLD:ACG8108	2
													GMGRF747-13	Diptera	Nilotanypus	Genus	BOLD:ACI6308	3
													GMGRF3018-13	Diptera	Asteromyia	Genus	BOLD:ACI6897	5
													GMGRF3644-13	Diptera	Corynoptera	Genus	BOLD:ACI8198	6
													GMGRF4122-13	Diptera	Corynoneura	Genus	BOLD:ACI8241	3
													GMGMA1363-14	Diptera	Xanthochlorus	Genus	BOLD:ACI8284	7
													GMGMC1089-14	Diptera	Megaselia	Genus	BOLD:ACJ0389	2
													GMGRH046-13	Diptera	Diastatidae	Genus	BOLD:ACJ2905	4
													GMGMC1549-14	Diptera	Asteromyia	Genus	BOLD:ACJ3177	5
													GMGRG3050-13	Diptera	Ceratopogonidae	Genus	BOLD:ACJ3180	5
													GMGRG1606-13	Diptera	Oscinella	Genus	BOLD:ACJ3230	17
													GMGRF899-13	Diptera	Asteromyia	Genus	BOLD:ACJ3458	5
													GMGRH2385-13	Diptera	Corynoptera	Genus	BOLD:ACJ4549	2
													GMGRF6363-13	Diptera	Phaonia	Genus	BOLD:ACJ6687	3
													GMGMB1004-14	Diptera	Tricimba	Genus	BOLD:ACP0618	30
													GMGMD782-14	Diptera	Liriomyza	Genus	BOLD:ACP3057	5
													GMGMB964-14	Diptera	Lycoriella	Genus	BOLD:ACP3565	10
													GMGMB1142-14	Diptera	Loewia	Genus	BOLD:ACP3825	2
													GMGMM673-14	Diptera	Ophiomyia	Genus	BOLD:ACP4138	5
													GMGMM1171-14	Diptera	Jassidophaga	Genus	BOLD:ACP5629	4
													GMGML814-14	Diptera	Atrichopogon	Genus	BOLD:ACP7223	3
													GMGMM1223-14	Diptera	Diplonevra	Genus	BOLD:ACQ1029	2
													GMGMM1206-14	Diptera	Neophyllomyza	Genus	BOLD:ACQ8516	5
													GMGMN1087-14	Diptera	Thaumatomyia	Genus	BOLD:ACQ9264	9
													GMGMC1100-14	Diptera	Thaumatomyia	Genus	BOLD:ACQ9265	4
													GMGMB995-14	Diptera	Drosophila	Genus	BOLD:ACQ9325	7
													GMGMB1089-14	Diptera	Gaurax	Genus	BOLD:ACQ9929	4
													GMGMA784-14	Diptera	Empis	Genus	BOLD:ACQ9954	7
													GMGMC544-14	Diptera	Herniosina	Genus	BOLD:ACR0443	4
													GMGMC269-14	Diptera	Polyodaspis	Genus	BOLD:ACR0733	2
													GMGMC108-14	Diptera	Siphona	Genus	BOLD:ACR0833	3
													GMGMI550-14	Diptera	Liriomyza	Genus	BOLD:ACR1337	37
													GMGMI1213-14	Diptera	Crumomyia	Genus	BOLD:ACR1817	4
													GMGMK1338-14	Diptera	Eribella	Genus	BOLD:ACR2122	1
													GMGMJ912-14	Diptera	Sarcophaga	Genus	BOLD:ACR2560	2
													GMGMI709-14	Diptera	Pegomya	Genus	BOLD:ACR3394	5
													GMGMI727-14	Diptera	Oedalea	Genus	BOLD:ACR3631	3
													GMGMM1583-14	Diptera	Minettia	Genus	BOLD:ACR3737	2
													GMGMJ1163-14	Diptera	Melanagromyza	Genus	BOLD:ACR3935	2
													GMGMB1126-14	Diptera	Ophiomyia	Genus	BOLD:ACR4290	5
													GMGMC1446-14	Diptera	Cerodontha	Genus	BOLD:ACR5216	2
													GMGMB1316-14	Diptera	Fannia	Genus	BOLD:ACS1267	2
													GMGRG4753-13	Diptera	Lycoriella	Genus	BOLD:ACU8980	3
													GMGRA1798-13	Diptera	Lonchaea	Genus	BOLD:ACU9372	3
													GMGRC2188-13	Entomobryomorpha	Entomobrya	Genus	BOLD:ACF7015	21
													GMGRI782-13	Hemiptera	Prociphilus	Genus	BOLD:AAG4413	8
													GMGMJ1589-14	Hemiptera	Myzocallis	Genus	BOLD:AAI3333	5
													GMGML1093-14	Hemiptera	Empoasca	Genus	BOLD:AAN8406	255
													GMGMK1572-14	Hemiptera	Rhopalomyzus	Genus	BOLD:ACA4534	8
													GMGMK1193-14	Hemiptera	Evacanthus	Genus	BOLD:ACD0460	4
													GMGMM382-14	Hemiptera	Cixius	Genus	BOLD:ACD9994	9
													GMGRD3710-13	Hemiptera	Aphis	Genus	BOLD:ACI5175	5
													GMGMB327-14	Hemiptera	Anoecia	Genus	BOLD:ACJ3864	25
													GMGRI036-13	Hemiptera	Pachypappa	Genus	BOLD:ACJ9208	6
													GMGML1115-14	Hemiptera	Eupteryx	Genus	BOLD:ACO8254	67
													GMGML1588-14	Hemiptera	Uroleucon	Genus	BOLD:ACP8588	2
													GMGMC608-14	Hemiptera	Alebra	Genus	BOLD:ACR1968	2
													GMGMK1239-14	Hemiptera	Alebra	Genus	BOLD:ACR2547	2
													GMGMM341-14	Hemiptera	Anoecia	Genus	BOLD:ACR3224	3
													GMGMK1594-14	Hemiptera	Dysaphis	Genus	BOLD:ACR3448	9
													GMGMK709-14	Hymenoptera	Adelius	Genus	BOLD:AAG0698	25
													GMGMN630-14	Hymenoptera	Bracon	Genus	BOLD:AAG6689	4
													GMGML655-14	Hymenoptera	Clinocentrus	Genus	BOLD:AAG6690	3
													GMGMD519-14	Hymenoptera	Braconinae	Genus	BOLD:AAG6715	4
													GMGMA1052-14	Hymenoptera	Braconinae	Genus	BOLD:AAG6718	2
													GMGMJ660-14	Hymenoptera	Woldstedtius	Genus	BOLD:AAH0525	7
													GMGMC743-14	Hymenoptera	Listrodomus	Genus	BOLD:AAI1121	3
													GMGMK837-14	Hymenoptera	Macrocentrus	Genus	BOLD:AAI1657	4
													GMGMJ381-14	Hymenoptera	Oxytorus	Genus	BOLD:AAI2575	2
													GMGMB139-14	Hymenoptera	Pholetesor	Genus	BOLD:AAI2846	6
													GMGMC895-14	Hymenoptera	Blacus	Genus	BOLD:AAI4650	19
													GMGRD1885-13	Hymenoptera	Ascogaster	Genus	BOLD:AAI4827	3
													GMGRC886-13	Hymenoptera	Fiangniella	Genus	BOLD:AAI5543	13
													GMGRF3406-13	Hymenoptera	Euryproctus	Genus	BOLD:AAI5562	6
													GMGRC2214-13	Hymenoptera	Dinotrema	Genus	BOLD:AAI9890	15
													GMGMM924-14	Hymenoptera	Tycherus	Genus	BOLD:AAK3162	17
													GMGMJ1292-14	Hymenoptera	Ichneumonidae	Genus	BOLD:AAM7350	61
													GMGRG4333-13	Hymenoptera	Aprostocetus	Genus	BOLD:AAM7535	22
													GMGMM749-14	Hymenoptera	Eurytoma	Genus	BOLD:AAN4992	3
													GMGMA1191-14	Hymenoptera	Bracon	Genus	BOLD:AAN5771	3
													GMGRG4273-13	Hymenoptera	Telenomus	Genus	BOLD:AAN8098	307
													GMGRF1987-13	Hymenoptera	Pteromalus	Genus	BOLD:AAN8215	108
													GMGRG4385-13	Hymenoptera	Telenomus	Genus	BOLD:AAU4881	193
													GMGMD542-14	Hymenoptera	Choeras	Genus	BOLD:AAU6216	2
													GMGRF4494-13	Hymenoptera	Synopeas	Genus	BOLD:AAU8571	33
													GMGRC317-13	Hymenoptera	Amblyaspis	Genus	BOLD:AAU8575	14
													GMGMC1352-14	Hymenoptera	Alloxysta	Genus	BOLD:AAU8589	10
													GMGRB1390-13	Hymenoptera	Pronotalia	Genus	BOLD:AAU9002	30
													GMGRH2566-13	Hymenoptera	Anagrus	Genus	BOLD:AAU9004	101
													GMGRD1764-13	Hymenoptera	Hymenoptera	Genus	BOLD:AAU9136	24
													GMGRH2544-13	Hymenoptera	Trimorus	Genus	BOLD:AAU9229	38
													GMGRH2561-13	Hymenoptera	Platygastridae	Genus	BOLD:AAU9340	258
													GMGRC1290-13	Hymenoptera	Alysia	Genus	BOLD:AAU9413	7
													GMGMA992-14	Hymenoptera	Dusona	Genus	BOLD:AAU9857	3
													GMGML623-14	Hymenoptera	Torymus	Genus	BOLD:AAU9874	4
													GMGMJ1439-14	Hymenoptera	Phrudus	Genus	BOLD:AAV5029	2
													GMGRG4439-13	Hymenoptera	Mymaridae	Genus	BOLD:AAZ0173	25
													GMGRG4519-13	Hymenoptera	Centrodora	Genus	BOLD:AAZ5700	90
													GMGMD540-14	Hymenoptera	Orgilinae	Genus	BOLD:AAZ8749	8
													GMGMD630-14	Hymenoptera	Bracon	Genus	BOLD:AAZ8980	3
													GMGMN886-14	Hymenoptera	Aprostocetus	Genus	BOLD:ABA2593	6
													GMGMC433-14	Hymenoptera	Aprostocetus	Genus	BOLD:ABA2594	6
													GMGRI710-13	Hymenoptera	Telenomus	Genus	BOLD:ABA6298	10
													GMGRH2587-13	Hymenoptera	Cecidostiba	Genus	BOLD:ABA8010	22
													GMGMI1360-14	Hymenoptera	Eurytoma	Genus	BOLD:ABA8062	19
													GMGRF6286-13	Hymenoptera	Aphelinus	Genus	BOLD:ABA9128	31
													GMGRF4401-13	Hymenoptera	Tetrastichus	Genus	BOLD:ABU5710	5
													GMGRG4424-13	Hymenoptera	Aprostocetus	Genus	BOLD:ABU5716	2
													GMGRE3594-13	Hymenoptera	Diaulinopsis	Genus	BOLD:ABU6535	7
													GMGRG4315-13	Hymenoptera	Mymaridae	Genus	BOLD:ABV2681	17
													GMGRG4356-13	Hymenoptera	Mymaridae	Genus	BOLD:ABV9379	130
													GMGRG4308-13	Hymenoptera	Synopeas	Genus	BOLD:ABW3162	18
													GMGRF4489-13	Hymenoptera	Praon	Genus	BOLD:ABX2013	5
													GMGMJ1315-14	Hymenoptera	Bracon	Genus	BOLD:ABX4962	28
													GMGML1549-14	Hymenoptera	Bracon	Genus	BOLD:ABX6559	12
													GMGMC1407-14	Hymenoptera	Chelonus	Genus	BOLD:ABY4374	8
													GMGML1238-14	Hymenoptera	Campoletis	Genus	BOLD:ABY9114	63
													GMGMK1464-14	Hymenoptera	Cotesia	Genus	BOLD:ABZ3752	11
													GMGRC913-13	Hymenoptera	Dinotrema	Genus	BOLD:ABZ5623	26
													GMGRF5426-13	Hymenoptera	Mymaridae	Genus	BOLD:ABZ6843	25
													GMGRF4328-13	Hymenoptera	Telenomus	Genus	BOLD:ACC0276	6
													GMGMJ386-14	Hymenoptera	Megacara	Genus	BOLD:ACC4516	6
													GMGRC2264-13	Hymenoptera	Stenomacrus	Genus	BOLD:ACC4680	54
													GMGMI1337-14	Hymenoptera	Lissonota	Genus	BOLD:ACC6333	3
													GMGRD248-13	Hymenoptera	Dinotrema	Genus	BOLD:ACC6631	8
													GMGRB1456-13	Hymenoptera	Orthocentrus	Genus	BOLD:ACE2619	8
													GMGMC984-14	Hymenoptera	Praon	Genus	BOLD:ACE2829	3
													GMGMC877-14	Hymenoptera	Praon	Genus	BOLD:ACE2830	33
													GMGMA1451-14	Hymenoptera	Sussaba	Genus	BOLD:ACF0874	28
													GMGRG1097-13	Hymenoptera	Dinotrema	Genus	BOLD:ACF5268	8
													GMGRF5393-13	Hymenoptera	Aphanogmus	Genus	BOLD:ACF6025	18
													GMGRB1398-13	Hymenoptera	Telenomus	Genus	BOLD:ACF6026	8
													GMGRB1460-13	Hymenoptera	Aprostocetus	Genus	BOLD:ACF6076	5
													GMGRA1447-13	Hymenoptera	Synopeas	Genus	BOLD:ACF6372	4
													GMGRB1401-13	Hymenoptera	Braconidae	Genus	BOLD:ACF6846	2
													GMGRB1426-13	Hymenoptera	Telenomus	Genus	BOLD:ACF7380	2
													GMGRB1383-13	Hymenoptera	Braconidae	Genus	BOLD:ACF7565	11
													GMGRA1417-13	Hymenoptera	Telenomus	Genus	BOLD:ACF7644	3
													GMGRC2210-13	Hymenoptera	Helictes	Genus	BOLD:ACF9218	4
													GMGRB1439-13	Hymenoptera	Encarsia	Genus	BOLD:ACF9376	3
													GMGRC2282-13	Hymenoptera	Telenomus	Genus	BOLD:ACG3319	4
													GMGRC899-13	Hymenoptera	Atractodes	Genus	BOLD:ACG3740	25
													GMGRC914-13	Hymenoptera	Plectiscidea	Genus	BOLD:ACG3909	4
													GMGRC962-13	Hymenoptera	Telenomus	Genus	BOLD:ACG4390	8
													GMGRD2880-13	Hymenoptera	Aphanogmus	Genus	BOLD:ACG4508	8
													GMGRE1445-13	Hymenoptera	Campoplex	Genus	BOLD:ACG5039	23
													GMGRG1456-13	Hymenoptera	Hyposoter	Genus	BOLD:ACG5111	3
													GMGRF3436-13	Hymenoptera	Dusona	Genus	BOLD:ACG5270	7
													GMGMK458-14	Hymenoptera	Lissonota	Genus	BOLD:ACG5352	30
													GMGRD1054-13	Hymenoptera	Dinotrema	Genus	BOLD:ACG5385	3
													GMGRC2270-13	Hymenoptera	Dinotrema	Genus	BOLD:ACG5784	8
													GMGRC890-13	Hymenoptera	Dinotrema	Genus	BOLD:ACG5853	23
													GMGMI1369-14	Hymenoptera	Campoplex	Genus	BOLD:ACG6631	7
													GMGRA1811-13	Hymenoptera	Gelis	Genus	BOLD:ACG7791	4
													GMGRE1620-13	Hymenoptera	Probles	Genus	BOLD:ACG7967	18
													GMGRE782-13	Hymenoptera	Dinotrema	Genus	BOLD:ACG8022	4
													GMGRE3498-13	Hymenoptera	Ascogaster	Genus	BOLD:ACG8043	4
													GMGRD1716-13	Hymenoptera	Dinotrema	Genus	BOLD:ACG8256	2
													GMGMA717-14	Hymenoptera	Tranosema	Genus	BOLD:ACH1883	5
													GMGRE2484-13	Hymenoptera	Dusona	Genus	BOLD:ACI4039	6
													GMGRD1735-13	Hymenoptera	Telenomus	Genus	BOLD:ACI4139	9
													GMGRD2959-13	Hymenoptera	Telenomus	Genus	BOLD:ACI4334	21
													GMGRD2956-13	Hymenoptera	Telenomus	Genus	BOLD:ACI4513	2
													GMGRD3208-13	Hymenoptera	Telenomus	Genus	BOLD:ACI4527	15
													GMGRE3579-13	Hymenoptera	Aphanogmus	Genus	BOLD:ACI4732	20
													GMGRE3269-13	Hymenoptera	Telenomus	Genus	BOLD:ACI4761	3
													GMGRD1755-13	Hymenoptera	Aprostocetus	Genus	BOLD:ACI4867	2
													GMGMJ305-14	Hymenoptera	Ophion	Genus	BOLD:ACI6839	9
													GMGRH2579-13	Hymenoptera	Mymaridae	Genus	BOLD:ACI7821	15
													GMGRF3312-13	Hymenoptera	Erromenus	Genus	BOLD:ACI8586	2
													GMGRF6284-13	Hymenoptera	Gelis	Genus	BOLD:ACI8734	2
													GMGRF4539-13	Hymenoptera	Hymenoptera	Genus	BOLD:ACI8744	5
													GMGMD448-14	Hymenoptera	Bracon	Genus	BOLD:ACI8891	13
													GMGRG4314-13	Hymenoptera	Telenomus	Genus	BOLD:ACI9091	16
													GMGRF4546-13	Hymenoptera	Ichneumonidae	Genus	BOLD:ACI9117	12
													GMGRF5441-13	Hymenoptera	Telenomus	Genus	BOLD:ACI9128	70
													GMGRF649-13	Hymenoptera	Braconidae	Genus	BOLD:ACJ0484	2
													GMGRF965-13	Hymenoptera	Dinotrema	Genus	BOLD:ACJ0640	22
													GMGRG4383-13	Hymenoptera	Anaphes	Genus	BOLD:ACJ2666	2
													GMGRG4514-13	Hymenoptera	Anagrus	Genus	BOLD:ACJ2789	2
													GMGRF5467-13	Hymenoptera	Simple	Genus	BOLD:ACJ4737	2
													GMGRH2500-13	Hymenoptera	Pteromalus	Genus	BOLD:ACJ7542	2
													GMGRI662-13	Hymenoptera	Cotesia	Genus	BOLD:ACJ7764	2
													GMGRH2627-13	Hymenoptera	Dinotrema	Genus	BOLD:ACJ7908	2
													GMGMB601-14	Hymenoptera	Diadromus	Genus	BOLD:ACJ8164	2
													GMGMA742-14	Hymenoptera	Campoplex	Genus	BOLD:ACJ8425	7
													GMGRI657-13	Hymenoptera	Dinotrema	Genus	BOLD:ACJ8714	5
													GMGMA1444-14	Hymenoptera	Trioxys	Genus	BOLD:ACM1888	3
													GMGRC2904-13	Hymenoptera	Ichneumonidae	Genus	BOLD:ACM5733	3
													GMGML1503-14	Hymenoptera	Spathius	Genus	BOLD:ACM7217	6
													GMGMA724-14	Hymenoptera	Microgaster	Genus	BOLD:ACN6851	7
													GMGRD2927-13	Hymenoptera	Trichopria	Genus	BOLD:ACO8735	6
													GMGMA1508-14	Hymenoptera	Dolichogenidea	Genus	BOLD:ACO9343	4
													GMGRD1745-13	Hymenoptera	Mymaridae	Genus	BOLD:ACP1919	5
													GMGMD609-14	Hymenoptera	Ephedrus	Genus	BOLD:ACP2346	19
													GMGMD342-14	Hymenoptera	Dusona	Genus	BOLD:ACP6077	3
													GMGMJ1275-14	Hymenoptera	Exenterus	Genus	BOLD:ACP8060	6
													GMGMN544-14	Hymenoptera	Exenterus	Genus	BOLD:ACP8980	7
													GMGML352-14	Hymenoptera	Stantonia	Genus	BOLD:ACP9022	3
													GMGMJ1418-14	Hymenoptera	Diadegma	Genus	BOLD:ACQ0913	3
													GMGMD1194-14	Hymenoptera	Mesochorus	Genus	BOLD:ACQ1532	5
													GMGMC919-14	Hymenoptera	Cotesia	Genus	BOLD:ACQ1836	9
													GMGMJ1297-14	Hymenoptera	Chelonus	Genus	BOLD:ACQ7382	2
													GMGML630-14	Hymenoptera	Agrothereutes	Genus	BOLD:ACQ8696	3
													GMGMC394-14	Hymenoptera	Aphidius	Genus	BOLD:ACQ8813	3
													GMGMA1203-14	Hymenoptera	Microplitis	Genus	BOLD:ACQ8978	11
													GMGMB144-14	Hymenoptera	Schizoprymnus	Genus	BOLD:ACQ9058	6
													GMGMA1433-14	Hymenoptera	Omalus	Genus	BOLD:ACQ9469	2
													GMGMB786-14	Hymenoptera	Dolichogenidea	Genus	BOLD:ACQ9527	2
													GMGML617-14	Hymenoptera	Pholetesor	Genus	BOLD:ACQ9722	5
													GMGMC375-14	Hymenoptera	Braconidae	Genus	BOLD:ACQ9731	5
													GMGMA1139-14	Hymenoptera	Diadromus	Genus	BOLD:ACQ9990	2
													GMGMC454-14	Hymenoptera	Perilampus	Genus	BOLD:ACR0212	3
													GMGMI1404-14	Hymenoptera	Enytus	Genus	BOLD:ACR0315	21
													GMGMC446-14	Hymenoptera	Bracon	Genus	BOLD:ACR0409	4
													GMGML979-14	Hymenoptera	Echthronomas	Genus	BOLD:ACR0449	13
													GMGMC675-14	Hymenoptera	Tycherus	Genus	BOLD:ACR0632	4
													GMGMC964-14	Hymenoptera	Campoletis	Genus	BOLD:ACR0641	4
													GMGMA1050-14	Hymenoptera	Mesochorus	Genus	BOLD:ACR0851	4
													GMGMB136-14	Hymenoptera	Praon	Genus	BOLD:ACR2016	2
													GMGMI1348-14	Hymenoptera	Diadegma	Genus	BOLD:ACR3185	2
													GMGMN480-14	Hymenoptera	Diadegma	Genus	BOLD:ACR3406	2
													GMGMI1388-14	Hymenoptera	Helictes	Genus	BOLD:ACR3425	5
													GMGMI1416-14	Hymenoptera	Phobetes	Genus	BOLD:ACR3634	3
													GMGML1494-14	Hymenoptera	Enytus	Genus	BOLD:ACR3973	4
													GMGMN1558-14	Hymenoptera	Thecophora	Genus	BOLD:ACR4131	7
													GMGMD525-14	Hymenoptera	Bracon	Genus	BOLD:ACR4149	2
													GMGMK1474-14	Hymenoptera	Dinotrema	Genus	BOLD:ACR4260	5
													GMGMN631-14	Hymenoptera	Campoletis	Genus	BOLD:ACR4279	32
													GMGML370-14	Hymenoptera	Trychosis	Genus	BOLD:ACR4286	2
													GMGMD1165-14	Hymenoptera	Microplitis	Genus	BOLD:ACR4357	8
													GMGMJ1430-14	Hymenoptera	Anacharis	Genus	BOLD:ACR4438	31
													GMGMN588-14	Hymenoptera	Braconinae	Genus	BOLD:ACR4510	5
													GMGMK424-14	Hymenoptera	Phobocampe	Genus	BOLD:ACR4523	3
													GMGMB135-14	Hymenoptera	Aprostocetus	Genus	BOLD:ACR7208	2
													GMGML635-14	Hymenoptera	Aprostocetus	Genus	BOLD:ACR7298	4
													GMGRB1440-13	Hymenoptera	Aprostocetus	Genus	BOLD:ACS7297	12
													GMGMK1499-14	Hymenoptera	Synergus	Genus	BOLD:ACU0758	2
													GMGMC385-14	Hymenoptera	Aprostocetus	Genus	BOLD:ACU1172	3
													GMGRG4417-13	Hymenoptera	Gonatocerus	Genus	BOLD:ACU3186	39
													GMGMK882-14	Lepidoptera	Nemophora	Genus	BOLD:ACR2402	3
													GMGRH1897-13	Mesostigmata	Phytoseiidae	Genus	BOLD:ABV8662	8
													GMGRA1381-13	Trombidiformes	Abrolophus	Genus	BOLD:ACF9019	11
													GMGMG739-14	#N/A	Megaselia	Genus	BOLD:AAG3266	4043
													GMGMF605-14	#N/A	Brevicornu	Genus	BOLD:AAY6368	20
													GMGMF767-14	#N/A	Heleomyza	Genus	BOLD:ABA4085	50
													GMGMG1495-14	#N/A	Scatopsciara	Genus	BOLD:ABV1201	65
													GMGME130-14	#N/A	Netelia	Genus	BOLD:ACB8710	7
													GMGME319-14	#N/A	Orthocentrus	Genus	BOLD:ACE2685	12
													GMGMF433-14	#N/A	Docosia	Genus	BOLD:ACJ2633	8
													GMGMH866-14	#N/A	Aphidius	Genus	BOLD:ACO3393	22
													GMGMH795-14	#N/A	Ophiomyia	Genus	BOLD:ACP4139	10
													GMGME035-14	#N/A	Calliopum	Genus	BOLD:ACP8933	11
													GMGMH1072-14	#N/A	Paracricotopus	Genus	BOLD:ACP9613	239
													GMGMH1120-14	#N/A	Phytomyza	Genus	BOLD:ACQ9522	20
													GMGME353-14	#N/A	Braconidae	Genus	BOLD:ACR0571	14
													GMGME403-14	#N/A	Microctonus	Genus	BOLD:ACR0736	2
													GMGMG608-14	#N/A	Thaumatomyia	Genus	BOLD:ACR1136	4
													GMGMG138-14	#N/A	Phaonia	Genus	BOLD:ACR1145	10
													GMGME1352-14	#N/A	Lordiphosa	Genus	BOLD:ACR1184	8
													GMGMH584-14	#N/A	Cordilura	Genus	BOLD:ACR1368	19
													GMGMH203-14	#N/A	Napomyza	Genus	BOLD:ACR1468	6
													GMGMH853-14	#N/A	Schizopyga	Genus	BOLD:ACR2831	2
													GMGMH505-14	#N/A	Centeterus	Genus	BOLD:ACR3530	2
													GMGME1077-14	#N/A	Valenzuela	Genus	BOLD:ACR3866	249
													GMGME003-14	#N/A	Aphrophora	Genus	BOLD:ACR5174	5
													GMGML003-14	Hemiptera	Hemiptera	Order	BOLD:ACR2504	9
													GMGRC934-13	Hymenoptera	Hymenoptera	Order	BOLD:ACF6348	3
													GMGRD1734-13	Hymenoptera	Hymenoptera	Order	BOLD:ACI4866	6
													GMGRF3342-13	Hymenoptera	Hymenoptera	Order	BOLD:ACI8525	2
													GMGRF1961-13	Hymenoptera	Hymenoptera	Order	BOLD:ACI9051	3
													GMGRF4499-13	Hymenoptera	Hymenoptera	Order	BOLD:ACJ0374	2
													GMGRG4310-13	Hymenoptera	Hymenoptera	Order	BOLD:ACJ1096	2
													GMGRH146-13	Hymenoptera	Hymenoptera	Order	BOLD:ACJ4718	3
													GMGRI696-13	Hymenoptera	Hymenoptera	Order	BOLD:ACJ9123	9
													GMGMC383-14	Hymenoptera	Hymenoptera	Order	BOLD:ACP3638	2
													GMGMA120-14	Hymenoptera	Hymenoptera	Order	BOLD:ACQ8654	2
													GMGMN862-14	Hymenoptera	Hymenoptera	Order	BOLD:ACR7263	2
													GMGRG3928-13	Mesostigmata	Mesostigmata	Order	BOLD:ACJ5458	2
													GMGMK1525-14	Mesostigmata	Mesostigmata	Order	BOLD:ACM5222	6
													GMGRG4022-13	Symphypleona	Symphypleona	Order	BOLD:ACG4845	10
													GMGMC853-14	Araneae	Araneus diadematus	Species	BOLD:AAA4125	124
													GMGMK1516-14	Araneae	Misumena vatia	Species	BOLD:AAA6275	491
													GMGRE2937-13	Araneae	Clubiona trivialis	Species	BOLD:AAB0437	131
													GMGMA1559-14	Araneae	Salticus scenicus	Species	BOLD:AAC9044	34
													GMGMI1056-14	Araneae	Gibbaranea bituberculata	Species	BOLD:AAD3252	26
													GMGMK1515-14	Araneae	Linyphia triangularis	Species	BOLD:AAE6136	85
													GMGRB1055-13	Araneae	Micrommata virescens	Species	BOLD:AAG5688	48
													GMGRB1057-13	Araneae	Clubiona pallidula	Species	BOLD:AAI4087	68
													GMGMI958-14	Araneae	Araniella cucurbitina	Species	BOLD:AAI4460	58
													GMGMD1082-14	Araneae	Anelosimus vittatus	Species	BOLD:AAK0768	17
													GMGRH1989-13	Araneae	Heliophanus cupreus	Species	BOLD:AAK4555	32
													GMGRI826-13	Araneae	Metellina mengei	Species	BOLD:AAN4671	84
													GMGRH1993-13	Araneae	Tetragnatha pinicola	Species	BOLD:AAO0459	21
													GMGRE1973-13	Araneae	Neriene radiata	Species	BOLD:AAO2544	25
													GMGML1208-14	Araneae	Agelena labyrinthica	Species	BOLD:AAO2593	17
													GMGRD1573-13	Araneae	Phylloneta sisyphia	Species	BOLD:AAO4373	33
													GMGMM1511-14	Araneae	Philodromus dispar	Species	BOLD:AAP2403	37
													GMGRH1988-13	Araneae	Diaea dorsata	Species	BOLD:AAV1977	20
													GMGMK1517-14	Araneae	Nigma flavescens	Species	BOLD:AAY5237	15
													GMGRG4003-13	Araneae	Araneus sturmi	Species	BOLD:AAY5302	21
													GMGRC2970-13	Araneae	Episinus angulatus	Species	BOLD:AAY5356	22
													GMGRD3470-13	Araneae	Heliophanus dubius	Species	BOLD:AAY7737	14
													GMGRF5355-13	Araneae	Synageles venator	Species	BOLD:AAY7917	12
													GMGMM1509-14	Araneae	Clubiona brevipes	Species	BOLD:AAY8047	8
													GMGRD3469-13	Araneae	Clubiona caerulescens	Species	BOLD:AAZ7986	17
													GMGRG3993-13	Araneae	Clubiona subsultans	Species	BOLD:AAZ9795	27
													GMGRF5314-13	Araneae	Clubiona reclusa	Species	BOLD:ABA3813	17
													GMGRG3984-13	Araneae	Clubiona comta	Species	BOLD:ABA9330	18
													GMGRE2901-13	Araneae	Entelecara congenera	Species	BOLD:ABU6534	4
													GMGRF5356-13	Araneae	Evarcha falcata	Species	BOLD:ABY4778	36
													GMGML1078-14	Araneae	Philodromus praedatus	Species	BOLD:ACA5162	3
													GMGRF5353-13	Araneae	Neriene clathrata	Species	BOLD:ACF4294	14
													GMGRA1848-13	Araneae	Linyphiidae	Species	BOLD:ACF8920	3
													GMGMM1510-14	Araneae	Philodromus albidus	Species	BOLD:ACK1645	8
													GMGML1211-14	Araneae	Philodromus praedatus	Species	BOLD:ACR4121	11
													GMGMI1055-14	Araneae	Philodromus rufus	Species	BOLD:ACW1034	2
													GMGMA1541-14	Blattodea	Ectobius lapponicus	Species	BOLD:AAG9957	7
													GMGMJ165-14	Coleoptera	Harmonia axyridis	Species	BOLD:AAB5640	648
													GMGRF5669-13	Coleoptera	Clytus ruricola	Species	BOLD:AAB6702	192
													GMGMI239-14	Coleoptera	Rhagium bifasciatum	Species	BOLD:AAE3490	19
													GMGRD1513-13	Coleoptera	Elodes marginata	Species	BOLD:AAF4443	8
													GMGRB1159-13	Coleoptera	Strophosoma melanogrammum	Species	BOLD:AAG5222	273
													GMGMJ313-14	Coleoptera	Phyllopertha horticola	Species	BOLD:AAH8433	28
													GMGMI238-14	Coleoptera	Rhagium mordax	Species	BOLD:AAI0308	27
													GMGMN749-14	Coleoptera	Sciodrepoides watsoni	Species	BOLD:AAI0827	44
													GMGMM1471-14	Coleoptera	Bradycellus verbasci	Species	BOLD:AAI8234	16
													GMGRH1962-13	Coleoptera	Cortinicara gibbosa	Species	BOLD:AAI8935	1444
													GMGRD1524-13	Coleoptera	Sphindus dubius	Species	BOLD:AAJ3386	12
													GMGMK1070-14	Coleoptera	Aleochara sparsa	Species	BOLD:AAJ3392	11
													GMGMM1478-14	Coleoptera	Aspidiphorus orbiculatus	Species	BOLD:AAJ9399	21
													GMGRC2965-13	Coleoptera	Atheta sodalis	Species	BOLD:AAJ9572	11
													GMGMC764-14	Coleoptera	Ceutorhynchus obstrictus	Species	BOLD:AAK0575	48
													GMGML1207-14	Coleoptera	Rhagonycha fulva	Species	BOLD:AAL1297	67
													GMGMM1147-14	Coleoptera	Philonthus cognatus	Species	BOLD:AAL5087	32
													GMGMA1070-14	Coleoptera	Agriotes ustulatus	Species	BOLD:AAL6427	24
													GMGMA153-14	Coleoptera	Tychius meliloti	Species	BOLD:AAM7740	40
													GMGMK978-14	Coleoptera	Stenolophus teutonus	Species	BOLD:AAN0041	17
													GMGRD1563-13	Coleoptera	Phyllotreta undulata	Species	BOLD:AAN1718	16
													GMGMJ1482-14	Coleoptera	Meligethes viridescens	Species	BOLD:AAN3586	12
													GMGMK1007-14	Coleoptera	Cryptocephalus moraei	Species	BOLD:AAN3893	41
													GMGMJ869-14	Coleoptera	Denticollis linearis	Species	BOLD:AAN4145	23
													GMGMK960-14	Coleoptera	Scymnus rubromaculatus	Species	BOLD:AAN9250	41
													GMGMK1014-14	Coleoptera	Rhagonycha lignosa	Species	BOLD:AAN9289	31
													GMGMA156-14	Coleoptera	Anaspis frontalis	Species	BOLD:AAN9299	40
													GMGMI1060-14	Coleoptera	Melanotus villosus	Species	BOLD:AAN9631	16
													GMGMJ870-14	Coleoptera	Cantharis livida	Species	BOLD:AAN9702	20
													GMGRD1504-13	Coleoptera	Stenus fossulatus	Species	BOLD:AAN9837	5
													GMGRD1525-13	Coleoptera	Epuraea marseuli	Species	BOLD:AAN9859	16
													GMGRA1613-13	Coleoptera	Elateroides dermestoides	Species	BOLD:AAN9938	64
													GMGMJ1378-14	Coleoptera	Exapion fuscirostre	Species	BOLD:AAN9967	9
													GMGMJ868-14	Coleoptera	Cantharis cryptica	Species	BOLD:AAN9987	11
													GMGMK995-14	Coleoptera	Clanoptilus elegans	Species	BOLD:AAO0030	38
													GMGMJ1381-14	Coleoptera	Scymnus auritus	Species	BOLD:AAO0044	7
													GMGRD3049-13	Coleoptera	Aleocharinae	Species	BOLD:AAO0292	11
													GMGRG3962-13	Coleoptera	Gyrophaena joyioides	Species	BOLD:AAO0295	15
													GMGMC776-14	Coleoptera	Hispa atra	Species	BOLD:AAO0426	34
													GMGMK809-14	Coleoptera	Cassida rubiginosa	Species	BOLD:AAO0522	19
													GMGRC2944-13	Coleoptera	Bibloporus bicolor	Species	BOLD:AAO0612	10
													GMGMI947-14	Coleoptera	Oxystoma ochropus	Species	BOLD:AAO0629	18
													GMGMJ1382-14	Coleoptera	Malachius bipustulatus	Species	BOLD:AAO0716	27
													GMGMK972-14	Coleoptera	Oedemera lurida	Species	BOLD:AAO0911	22
													GMGRF5554-13	Coleoptera	Atheta crassicornis	Species	BOLD:AAO0987	19
													GMGML1199-14	Coleoptera	Athous haemorrhoidalis	Species	BOLD:AAO0995	36
													GMGRC2981-13	Coleoptera	Athous subfuscus	Species	BOLD:AAO0996	31
													GMGRD3652-13	Coleoptera	Atrecus affinis	Species	BOLD:AAO1016	12
													GMGMA1077-14	Coleoptera	Psyllobora vigintiduopunctata	Species	BOLD:AAO1034	48
													GMGRA1619-13	Coleoptera	Dalopius marginatus	Species	BOLD:AAO1078	34
													GMGMK794-14	Coleoptera	Larinus planus	Species	BOLD:AAO1182	13
													GMGML1055-14	Coleoptera	Rhagonycha lutea	Species	BOLD:AAO1269	15
													GMGMJ1379-14	Coleoptera	Phyllobius roboretanus	Species	BOLD:AAO1323	20
													GMGMJ867-14	Coleoptera	Phytoecia nigricornis	Species	BOLD:AAO1346	9
													GMGMC786-14	Coleoptera	Aphthona venustula	Species	BOLD:AAO1357	15
													GMGMI936-14	Coleoptera	Derocrepis rufipes	Species	BOLD:AAO1517	10
													GMGML1063-14	Coleoptera	Anthonomus rubi	Species	BOLD:AAO1528	7
													GMGRG3970-13	Coleoptera	Pteryngium crenatum	Species	BOLD:AAO1914	10
													GMGRF5668-13	Coleoptera	Rhagonycha translucida	Species	BOLD:AAO1935	13
													GMGMK333-14	Coleoptera	Trichius zonatus	Species	BOLD:AAO2365	9
													GMGMN772-14	Coleoptera	Anthaxia quadripunctata	Species	BOLD:AAO2744	19
													GMGMK1004-14	Coleoptera	Grammoptera ruficornis	Species	BOLD:AAO4230	18
													GMGMK994-14	Coleoptera	Anaspis pulicaria	Species	BOLD:AAO4386	20
													GMGMJ152-14	Coleoptera	Stenocorus meridianus	Species	BOLD:AAO4412	7
													GMGMK806-14	Coleoptera	Stenurella nigra	Species	BOLD:AAO4415	12
													GMGMJ1481-14	Coleoptera	Rhynchites caeruleus	Species	BOLD:AAO4453	7
													GMGMN765-14	Coleoptera	Tomoxia bucephala	Species	BOLD:AAO4468	10
													GMGMK1016-14	Coleoptera	Cryptocephalus bipunctatus	Species	BOLD:AAO4673	56
													GMGMC758-14	Coleoptera	Dasytes plumbeus	Species	BOLD:AAO4702	33
													GMGMA157-14	Coleoptera	Mordellistena bicoloripilosa	Species	BOLD:AAO4939	6
													GMGRA1614-13	Coleoptera	Lilioceris merdigera	Species	BOLD:AAO4967	12
													GMGMC261-14	Coleoptera	Ontholestes murinus	Species	BOLD:AAP6128	15
													GMGMN331-14	Coleoptera	Odonteus armiger	Species	BOLD:AAP7329	11
													GMGRC1073-13	Coleoptera	Malthodes pumilus	Species	BOLD:AAP7843	539
													GMGRD3664-13	Coleoptera	Scaphinotus marginatus	Species	BOLD:AAP7848	48
													GMGMA1069-14	Coleoptera	Lagria hirta	Species	BOLD:AAP8224	18
													GMGMJ1396-14	Coleoptera	Leistus rufomarginatus	Species	BOLD:AAP8339	10
													GMGML1047-14	Coleoptera	Anaspis costai	Species	BOLD:AAP9940	11
													GMGRE3162-13	Coleoptera	Cryptocephalus labiatus	Species	BOLD:AAQ0873	14
													GMGRH1959-13	Coleoptera	Anisotoma castanea	Species	BOLD:AAR3436	11
													GMGMD372-14	Coleoptera	Nacerdes carniolica	Species	BOLD:AAU5463	5
													GMGRE2822-13	Coleoptera	Pyropterus nigroruber	Species	BOLD:AAV4200	12
													GMGRE3171-13	Coleoptera	Malthodes guttifer	Species	BOLD:AAV7679	18
													GMGMD1068-14	Coleoptera	Olibrus aeneus	Species	BOLD:AAW1324	12
													GMGMK1072-14	Coleoptera	Ampedus quercicola	Species	BOLD:AAW1555	22
													GMGMK1037-14	Coleoptera	Bruchus affinis	Species	BOLD:AAW6984	89
													GMGRB1984-13	Coleoptera	Geostiba circellaris	Species	BOLD:AAY1422	16
													GMGMI251-14	Coleoptera	Cicindela campestris	Species	BOLD:AAY8119	24
													GMGMJ1369-14	Coleoptera	Holotrichapion pisi	Species	BOLD:AAZ2992	9
													GMGRA1829-13	Coleoptera	Byturus tomentosus	Species	BOLD:AAZ8611	22
													GMGMD367-14	Coleoptera	Lagria hirta	Species	BOLD:ABA0559	3
													GMGMK1027-14	Coleoptera	Danacea nigritarsis	Species	BOLD:ABA1503	43
													GMGMM1475-14	Coleoptera	Dasytes virens	Species	BOLD:ABA2524	16
													GMGRD1500-13	Coleoptera	Anthophagus alpestris	Species	BOLD:ABA3385	16
													GMGRD2996-13	Coleoptera	Malthodes mysticus	Species	BOLD:ABU9145	9
													GMGMC467-14	Coleoptera	Cryptocephalus pygmaeus	Species	BOLD:ABV8806	12
													GMGRF5559-13	Coleoptera	Atheta hypnorum	Species	BOLD:ABW4502	7
													GMGMK018-14	Coleoptera	Agapanthia villosoviridescens	Species	BOLD:ABW4537	14
													GMGMK1507-14	Coleoptera	Trixagus carinifrons	Species	BOLD:ABW4548	64
													GMGMM1480-14	Coleoptera	Danacea pallipes	Species	BOLD:ABW5875	11
													GMGRF5550-13	Coleoptera	Gabrius appendiculatus	Species	BOLD:ABW7167	13
													GMGRD3042-13	Coleoptera	Gyrophaena affinis	Species	BOLD:ABW9049	10
													GMGRF5564-13	Coleoptera	Atheta gagatina	Species	BOLD:ABW9184	20
													GMGRD2993-13	Coleoptera	Epuraea pygmaea	Species	BOLD:ABW9409	6
													GMGMM1453-14	Coleoptera	Mordellistena neuwaldeggiana	Species	BOLD:ABW9458	16
													GMGRC2942-13	Coleoptera	Malthodes brevicollis	Species	BOLD:ABW9493	23
													GMGRD1565-13	Coleoptera	Neuraphes elongatulus	Species	BOLD:ABX1062	4
													GMGRC1069-13	Coleoptera	Dasytes obscurus	Species	BOLD:ABX3073	18
													GMGRC1088-13	Coleoptera	Eusphalerum longipenne	Species	BOLD:ABX3701	25
													GMGRF5563-13	Coleoptera	Eusphalerum rectangulum	Species	BOLD:ABX3793	13
													GMGMI937-14	Coleoptera	Mordellistena pumila	Species	BOLD:ABX9869	10
													GMGMJ1480-14	Coleoptera	Mordellistena pumila	Species	BOLD:ABX9870	9
													GMGMI944-14	Coleoptera	Charopus pallipes	Species	BOLD:ABX9920	7
													GMGMA158-14	Coleoptera	Lordithon thoracicus	Species	BOLD:ACA5312	6
													GMGRD1510-13	Coleoptera	Malthodes fuscus	Species	BOLD:ACA9020	27
													GMGRH1957-13	Coleoptera	Cyphon padi	Species	BOLD:ACB2997	6
													GMGMJ312-14	Coleoptera	Ancistronycha cyanipennis	Species	BOLD:ACB7304	12
													GMGRC1091-13	Coleoptera	Malthodes hexacanthus	Species	BOLD:ACB8838	17
													GMGMI267-14	Coleoptera	Athous vittatus	Species	BOLD:ACC1206	4
													GMGMA1549-14	Coleoptera	Tychius breviusculus	Species	BOLD:ACC1422	5
													GMGMK800-14	Coleoptera	Stenurella melanura	Species	BOLD:ACC3140	2
													GMGMC772-14	Coleoptera	Trixagus meybohmi	Species	BOLD:ACC5051	47
													GMGRG3964-13	Coleoptera	Hydnobius multistriatus	Species	BOLD:ACC7172	2
													GMGRE3158-13	Coleoptera	Epuraea terminalis	Species	BOLD:ACD0726	4
													GMGMK1514-14	Coleoptera	Ebaeus thoracicus	Species	BOLD:ACD1339	12
													GMGRD2985-13	Coleoptera	Aleocharinae	Species	BOLD:ACD1346	5
													GMGRC2955-13	Coleoptera	Aleocharinae	Species	BOLD:ACD1406	14
													GMGML1034-14	Coleoptera	Aphthona cyparissiae	Species	BOLD:ACF4286	4
													GMGMM1476-14	Coleoptera	Meligethes aeneus	Species	BOLD:ACF5199	35
													GMGRA1833-13	Coleoptera	Amphichroum canaliculatum	Species	BOLD:ACF6545	13
													GMGRB1150-13	Coleoptera	Cantharis pagana	Species	BOLD:ACG1737	2
													GMGRB1147-13	Coleoptera	Athous zebei	Species	BOLD:ACG2425	7
													GMGRF5561-13	Coleoptera	Atheta britanniae	Species	BOLD:ACG2507	3
													GMGRG3963-13	Coleoptera	Phyllotreta vittula	Species	BOLD:ACG2741	24
													GMGRC3070-13	Coleoptera	Chrysanthia viridissima	Species	BOLD:ACG2757	37
													GMGRD3027-13	Coleoptera	Staphylinidae	Species	BOLD:ACG3365	2
													GMGRC2960-13	Coleoptera	Catops subfuscus	Species	BOLD:ACG5141	2
													GMGRG3968-13	Coleoptera	Longitarsus ochroleucus	Species	BOLD:ACG8606	2
													GMGRC2992-13	Coleoptera	Ampedus	Species	BOLD:ACG8737	19
													GMGMA1555-14	Coleoptera	Adrastus montanus	Species	BOLD:ACG8745	5
													GMGMA1548-14	Coleoptera	Mordellistena parvuloides	Species	BOLD:ACG8927	10
													GMGMK965-14	Coleoptera	Bruchidius marginalis	Species	BOLD:ACG9517	9
													GMGMK954-14	Coleoptera	Xyleborus dryographus	Species	BOLD:ACI5066	3
													GMGMK1506-14	Coleoptera	Anthaxia nitidula	Species	BOLD:ACO4369	14
													GMGMA1174-14	Coleoptera	Mordellistena pumila	Species	BOLD:ACP4687	5
													GMGRF5665-13	Coleoptera	Absidia rufotestacea	Species	BOLD:ACS6308	10
													GMGMJ685-14	Diptera	Musca autumnalis	Species	BOLD:AAA3187	210
													GMGMA910-14	Diptera	Limnophyes minimus	Species	BOLD:AAA8204	1592
													GMGRA1224-13	Diptera	Micropsectra junci	Species	BOLD:AAA9963	20
													GMGMB593-14	Diptera	Eristalis tenax	Species	BOLD:AAB0391	97
													GMGRD108-13	Diptera	Rheocricotopus effusus	Species	BOLD:AAB3288	26
													GMGRB056-13	Diptera	Limnophyes natalensis	Species	BOLD:AAB7361	782
													GMGRA1359-13	Diptera	Limnophyes edwardsi	Species	BOLD:AAB9700	26
													GMGRG4557-13	Diptera	Macropelopia notata	Species	BOLD:AAC1445	15
													GMGMI1452-14	Diptera	Tephritis formosa	Species	BOLD:AAC3096	11
													GMGRA866-13	Diptera	Micropsectra notescens	Species	BOLD:AAC4098	8
													GMGMA168-14	Diptera	Paraphaenocladius impensus	Species	BOLD:AAC4200	19
													GMGMK557-14	Diptera	Syritta pipiens	Species	BOLD:AAC6291	47
													GMGRA550-13	Diptera	Metriocnemus albolineatus	Species	BOLD:AAC6643	66
													GMGRD2363-13	Diptera	Krenopelopia	Species	BOLD:AAC9196	3
													GMGRD1608-13	Diptera	Krenopelopia	Species	BOLD:AAC9197	4
													GMGMM526-14	Diptera	Xyphosia miliaria	Species	BOLD:AAC9753	14
													GMGRA1570-13	Diptera	Corynoneura lobata	Species	BOLD:AAD1162	13
													GMGMM630-14	Diptera	Ensina sonchi	Species	BOLD:AAD1552	24
													GMGRE1733-13	Diptera	Limnophyes asquamatus	Species	BOLD:AAD1720	88
													GMGML1261-14	Diptera	Myospila meditabunda	Species	BOLD:AAD7145	134
													GMGMM596-14	Diptera	Orthocladius oblidens	Species	BOLD:AAD8971	325
													GMGRF1144-13	Diptera	Pseudorthocladius filiformis	Species	BOLD:AAD9250	15
													GMGRF5041-13	Diptera	Pseudorthocladius filiformis	Species	BOLD:AAD9251	3
													GMGRF1779-13	Diptera	Micropsectra appendica	Species	BOLD:AAE0593	10
													GMGRD3250-13	Diptera	Limnophyes difficilis	Species	BOLD:AAE0964	10
													GMGRB803-13	Diptera	Paraphaenocladius exagitans	Species	BOLD:AAE3719	3
													GMGRB840-13	Diptera	Micropsectra nana	Species	BOLD:AAE7238	49
													GMGRA1329-13	Diptera	Heterotrissocladius marcidus	Species	BOLD:AAF2163	26
													GMGRD2538-13	Diptera	Stempellinella brevis	Species	BOLD:AAF3516	16
													GMGMM1562-14	Diptera	Protopiophila latipes	Species	BOLD:AAF6352	19
													GMGRG3492-13	Diptera	Tvetenia calvescens	Species	BOLD:AAF6378	12
													GMGRH789-13	Diptera	Micropsectra roseiventris	Species	BOLD:AAF7002	10
													GMGMC1314-14	Diptera	Aphidoletes aphidimyza	Species	BOLD:AAF7193	91
													GMGMC1588-14	Diptera	Psychoda	Species	BOLD:AAF9314	416
													GMGMJ697-14	Diptera	Suillia affinis	Species	BOLD:AAG0467	63
													GMGRD3104-13	Diptera	Heleomyzidae	Species	BOLD:AAG0468	130
													GMGMC542-14	Diptera	Tvetenia calvescens	Species	BOLD:AAG1011	185
													GMGMJ1154-14	Diptera	Bryophaenocladius sp. 8ES	Species	BOLD:AAG1021	339
													GMGRG4844-13	Diptera	Thienemanniella caspersi	Species	BOLD:AAG1617	7
													GMGRG4874-13	Diptera	Thricops diaphanus	Species	BOLD:AAG1710	199
													GMGMM510-14	Diptera	Helina depuncta	Species	BOLD:AAG1711	392
													GMGMJ716-14	Diptera	Muscina pascuorum	Species	BOLD:AAG1714	149
													GMGMJ678-14	Diptera	Brachicoma devia	Species	BOLD:AAG2171	79
													GMGRD1446-13	Diptera	Metopia campestris	Species	BOLD:AAG2427	49
													GMGMJ694-14	Diptera	Hydrophoria lancifer	Species	BOLD:AAG2460	2783
													GMGMB1539-14	Diptera	Hylemyza partita	Species	BOLD:AAG2463	435
													GMGMC086-14	Diptera	Delia radicum	Species	BOLD:AAG2465	112
													GMGRF2737-13	Diptera	Pegomya geniculata	Species	BOLD:AAG2466	263
													GMGRD2834-13	Diptera	Alliopsis silvestris	Species	BOLD:AAG2500	59
													GMGMI513-14	Diptera	Delia platura	Species	BOLD:AAG2511	963
													GMGMM857-14	Diptera	Diplonevra nitidula	Species	BOLD:AAG3236	1568
													GMGRC1956-13	Diptera	Megaselia eccoptomera	Species	BOLD:AAG3250	522
													GMGRB1772-13	Diptera	Megaselia longicostalis	Species	BOLD:AAG3263	50
													GMGMD1091-14	Diptera	Megaselia ruficornis	Species	BOLD:AAG3268	86
													GMGRE340-13	Diptera	Megaselia lutea	Species	BOLD:AAG3351	113
													GMGRE332-13	Diptera	Megaselia lucifrons	Species	BOLD:AAG3359	249
													GMGML591-14	Diptera	Mycetophila luctuosa	Species	BOLD:AAG3628	99
													GMGRC3076-13	Diptera	Tipula flavolineata	Species	BOLD:AAG4556	4
													GMGMJ744-14	Diptera	Fannia sociella	Species	BOLD:AAG4620	179
													GMGMI1314-14	Diptera	Platycheirus ambiguus	Species	BOLD:AAG4671	7
													GMGMB967-14	Diptera	Agromyza albipennis	Species	BOLD:AAG4745	47
													GMGRD3140-13	Diptera	Tetragoneura sylvatica	Species	BOLD:AAG4900	46
													GMGRE1505-13	Diptera	Mycetophila alea	Species	BOLD:AAG4931	205
													GMGRC1911-13	Diptera	Sciaridae	Species	BOLD:AAG4963	20
													GMGMD901-14	Diptera	Sepsis punctum	Species	BOLD:AAG5639	220
													GMGMN368-14	Diptera	Nemopoda nitidula	Species	BOLD:AAG5640	73
													GMGRD1621-13	Diptera	Culicoides kibunensis	Species	BOLD:AAG6430	3
													GMGRD3123-13	Diptera	Gymnometriocnemus pallidus	Species	BOLD:AAG6457	192
													GMGRE876-13	Diptera	Pseudosmittia	Species	BOLD:AAG6458	141
													GMGRF2641-13	Diptera	Ceratopogonidae	Species	BOLD:AAG6501	982
													GMGMJ729-14	Diptera	Sarcophaga subvicina	Species	BOLD:AAG6743	612
													GMGRD2097-13	Diptera	Terrilimosina schmitzi	Species	BOLD:AAG7021	350
													GMGRC459-13	Diptera	Megaselia nigriceps	Species	BOLD:AAG7022	564
													GMGRB1005-13	Diptera	Megaselia longicostalis	Species	BOLD:AAG7025	52
													GMGMJ693-14	Diptera	Phaonia subventa	Species	BOLD:AAG7029	70
													GMGMJ765-14	Diptera	Scathophaga furcata	Species	BOLD:AAH0022	2960
													GMGMA632-14	Diptera	Rhagio tringarius	Species	BOLD:AAH2953	50
													GMGRA1226-13	Diptera	Metriocnemus caudigus	Species	BOLD:AAH3792	3
													GMGMD895-14	Diptera	Bradysia flavipila	Species	BOLD:AAH3929	440
													GMGRD337-13	Diptera	Bradysia longicubitalis	Species	BOLD:AAH3938	29
													GMGMI191-14	Diptera	Sarcophaga sexpunctata	Species	BOLD:AAH7150	19
													GMGMM222-14	Diptera	Volucella pellucens	Species	BOLD:AAH7775	23
													GMGMM203-14	Diptera	Volucella zonaria	Species	BOLD:AAH7785	7
													GMGRD3602-13	Diptera	Tabanus maculicornis	Species	BOLD:AAH9535	20
													GMGRA1610-13	Diptera	Corynoneura minuscula	Species	BOLD:AAI0860	5
													GMGMN715-14	Diptera	Micropsectra sp. 5ES	Species	BOLD:AAI1530	33
													GMGMN308-14	Diptera	Helophilus hybridus	Species	BOLD:AAI2000	74
													GMGMB1441-14	Diptera	Pollenia griseotomentosa	Species	BOLD:AAI2766	96
													GMGMB1589-14	Diptera	Nephrotoma aculeata	Species	BOLD:AAI3222	18
													GMGRH2236-13	Diptera	Mycetophila caudata	Species	BOLD:AAI3260	63
													GMGRD725-13	Diptera	Eloeophila submarmorata	Species	BOLD:AAI5280	5
													GMGMB115-14	Diptera	Culex hortensis	Species	BOLD:AAI5767	33
													GMGMC285-14	Diptera	Cricotopus bicinctus	Species	BOLD:AAI6018	110
													GMGRD3144-13	Diptera	Gymnometriocnemus subnudus	Species	BOLD:AAI6451	209
													GMGMJ767-14	Diptera	Helina lasiophthalma	Species	BOLD:AAI6961	15
													GMGML492-14	Diptera	Hydrotaea dentipes	Species	BOLD:AAI8769	16
													GMGMJ236-14	Diptera	Chrysotoxum cautum	Species	BOLD:AAJ0972	27
													GMGMI509-14	Diptera	Limnophyes habilis	Species	BOLD:AAJ2130	683
													GMGRE1498-13	Diptera	Spilogona	Species	BOLD:AAJ3564	15
													GMGMC1293-14	Diptera	Sphaerocera curvipes	Species	BOLD:AAJ3921	9
													GMGRD3604-13	Diptera	Chrysops caecutiens	Species	BOLD:AAJ5023	8
													GMGRG714-13	Diptera	Cordyla fusca	Species	BOLD:AAJ5766	52
													GMGMJ700-14	Diptera	Sicus ferrugineus	Species	BOLD:AAJ6722	31
													GMGMA882-14	Diptera	Agromyza pseudoreptans	Species	BOLD:AAJ7051	16
													GMGMB951-14	Diptera	Agromyza frontella	Species	BOLD:AAJ7105	74
													GMGRD807-13	Diptera	Tricimba	Species	BOLD:AAJ8558	15
													GMGRB1512-13	Diptera	Thricops cunctans	Species	BOLD:AAK1780	160
													GMGRF2806-13	Diptera	Tetanocera phyllophora	Species	BOLD:AAK2425	21
													GMGMC1488-14	Diptera	Synorthocladius semivirens	Species	BOLD:AAK6026	13
													GMGRC2638-13	Diptera	Mycomya levis	Species	BOLD:AAK8905	3
													GMGMC1199-14	Diptera	Polypedilum albicorne	Species	BOLD:AAL0178	70
													GMGRB1051-13	Diptera	Pseudorthocladius pilosipennis	Species	BOLD:AAL1600	8
													GMGML734-14	Diptera	Pegoplata infirma	Species	BOLD:AAL3598	27
													GMGRF003-13	Diptera	Megaselia pulcaria-komplex	Species	BOLD:AAL9073	481
													GMGRH1002-13	Diptera	Megaselia giraudii	Species	BOLD:AAL9079	388
													GMGRB680-13	Diptera	Megaselia subpalpalis	Species	BOLD:AAL9083	320
													GMGRC2582-13	Diptera	Pipiza quadrimaculata	Species	BOLD:AAM5008	80
													GMGMC1300-14	Diptera	Paratrichocladius rufiventris	Species	BOLD:AAM5377	264
													GMGMI494-14	Diptera	Forcipomyia sp. 4ES	Species	BOLD:AAM6200	68
													GMGMD1263-14	Diptera	Bryophaenocladius ictericus	Species	BOLD:AAM6273	214
													GMGRE423-13	Diptera	Acnemia amoena	Species	BOLD:AAM8989	10
													GMGRA1168-13	Diptera	Corynoptera melanochaeta	Species	BOLD:AAM9242	628
													GMGMB913-14	Diptera	Sciara hebes	Species	BOLD:AAM9253	446
													GMGRC1843-13	Diptera	Megaselia fungivora	Species	BOLD:AAM9346	103
													GMGMJ221-14	Diptera	Merodon equestris	Species	BOLD:AAN2436	36
													GMGMJ749-14	Diptera	Cylindromyia bicolor	Species	BOLD:AAN3295	12
													GMGRE368-13	Diptera	Camptocladius stercorarius	Species	BOLD:AAN5341	122
													GMGMJ699-14	Diptera	Bellardia vulgaris	Species	BOLD:AAN5406	13
													GMGMD732-14	Diptera	Oscinella frit	Species	BOLD:AAN5659	13
													GMGMN1117-14	Diptera	Conicera dauci	Species	BOLD:AAN8685	18
													GMGMA923-14	Diptera	Psychoda trinodulosa	Species	BOLD:AAN8770	356
													GMGMJ1169-14	Diptera	Paratendipes albimanus	Species	BOLD:AAO1037	113
													GMGRH1829-13	Diptera	Phronia	Species	BOLD:AAP1117	46
													GMGMI544-14	Diptera	Keroplatidae	Species	BOLD:AAP2528	194
													GMGMC1071-14	Diptera	Hydrellia griseola	Species	BOLD:AAP2864	38
													GMGRB564-13	Diptera	Fanniidae	Species	BOLD:AAP2960	19
													GMGRA1736-13	Diptera	Eutrichota	Species	BOLD:AAP2968	49
													GMGMI685-14	Diptera	Napomyza cichorii	Species	BOLD:AAP2990	5
													GMGRF2742-13	Diptera	Fannia fuscula	Species	BOLD:AAP6339	20
													GMGMB096-14	Diptera	Philygria vittipennis	Species	BOLD:AAP6349	41
													GMGRE384-13	Diptera	Bryophaenocladius cf. vernalis	Species	BOLD:AAP6930	54
													GMGML267-14	Diptera	Eustalomyia festiva	Species	BOLD:AAP8833	29
													GMGRD2172-13	Diptera	Triphleba subcompleta	Species	BOLD:AAP9864	10
													GMGMJ243-14	Diptera	Eristalis pertinax	Species	BOLD:AAQ3585	38
													GMGMK1390-14	Diptera	Chromatomyia milii	Species	BOLD:AAR9798	73
													GMGMK1435-14	Diptera	Cricotopus bicinctus	Species	BOLD:AAT9677	24
													GMGRI531-13	Diptera	Mycetophilidae	Species	BOLD:AAU4986	38
													GMGRC2056-13	Diptera	Megaselia hirtiventris	Species	BOLD:AAU5626	58
													GMGMJ1174-14	Diptera	Corynoptera cuniculata	Species	BOLD:AAU6537	50
													GMGMI1455-14	Diptera	Fannia armata	Species	BOLD:AAU6630	197
													GMGRF027-13	Diptera	Megaselia pulcaria-komplex	Species	BOLD:AAU8534	2528
													GMGMM1033-14	Diptera	Rhingia rostrata	Species	BOLD:AAV1208	10
													GMGMB1047-14	Diptera	Bradysia fenestralis	Species	BOLD:AAV1366	74
													GMGMD882-14	Diptera	Thienemannimyia northumbrica	Species	BOLD:AAV2698	3
													GMGRF3101-13	Diptera	Metriocnemus sp. 5ES	Species	BOLD:AAV4655	8
													GMGMD775-14	Diptera	Subclytia rotundiventris	Species	BOLD:AAV8345	6
													GMGMI1251-14	Diptera	Siphona maculata	Species	BOLD:AAV8847	31
													GMGML258-14	Diptera	Cylindromyia auriceps	Species	BOLD:AAV9203	14
													GMGMC328-14	Diptera	Tanytarsus ejuncidus	Species	BOLD:AAW1102	22
													GMGRA339-13	Diptera	Limnophyes sp. 8ES	Species	BOLD:AAW1297	10
													GMGMJ1200-14	Diptera	Bryophaenocladius flavoscutellatus	Species	BOLD:AAW1344	42
													GMGMI737-14	Diptera	Cerodontha flavocingulata	Species	BOLD:AAW4406	29
													GMGMC1458-14	Diptera	Polypedilum convictum	Species	BOLD:AAW4661	6
													GMGMI1030-14	Diptera	Trypeta zoe	Species	BOLD:AAW8654	17
													GMGML460-14	Diptera	Paykullia maculata	Species	BOLD:AAX1768	13
													GMGRD2810-13	Diptera	Hydrotaea irritans	Species	BOLD:AAX2545	5
[truncated: 1,358 more rows]
