# Supplementary material for: Testing the Global Malaise Trap Program – How well does the current barcode reference library identify flying insects in Germany?
Source: Biodivers Data J. 2016 Dec 1;(4):e10671. doi: 10.3897/BDJ.4.e10671 (PMC5136679; doi:10.3897/BDJ.4.e10671)
Supplement: Supplementary material 2 — Compilation of all specimens not identified to species level with embedded links leading to the respective BIN or specimen page on BOLD for an easy entry point to start refinements of taxonomic placements. [file biodiversity_data_journal-4-e10671-s002.xlsx]

## Sheet: Tabelle1
Project	Container Code	Process ID	Link	Sample ID	Field ID	BIN	Link	Catalog Num	COI-5P Seq. Length	Collection Date	Order	Family	Genus	Identifier	Identification method	Month
GMTPE	GMGRA	GMGRA1375-13	Specimen on BOLD	BIOUG04489-F11	bayw.1	BOLD:AAF9236	BIN on BOLD	BIOUG04489-F11	638	04-May-2012	Trombidiformes	Anystidae	0	Kate Perez	BIN Taxonomy Match	May
GMTPE	GMGRA	GMGRA1376-13	Specimen on BOLD	BIOUG04489-F12	bayw.1	BOLD:AAF9236	BIN on BOLD	BIOUG04489-F12	618	08-May-2012	Trombidiformes	Anystidae	0	Kate Perez	BIN Taxonomy Match	May
GMTPE	GMGRA	GMGRA1377-13	Specimen on BOLD	BIOUG04489-G01	bayw.1	BOLD:AAF9236	BIN on BOLD	BIOUG04489-G01	632	04-May-2012	Trombidiformes	Anystidae	0	Kate Perez	BIN Taxonomy Match	May
GMTPE	GMGRB	GMGRB1074-13	Specimen on BOLD	BIOUG04799-C01	bayw.3	BOLD:AAF9236	BIN on BOLD	BIOUG04799-C01	636	18-May-2012	Trombidiformes	Anystidae	0	Kate Perez	BIN Taxonomy Match	May
GMTPE	GMGRB	GMGRB1075-13	Specimen on BOLD	BIOUG04799-C02	bayw.3	BOLD:AAF9236	BIN on BOLD	BIOUG04799-C02	634	18-May-2012	Trombidiformes	Anystidae	0	Kate Perez	BIN Taxonomy Match	May
GMTPE	GMGRB	GMGRB1077-13	Specimen on BOLD	BIOUG04799-C04	bayw.3	BOLD:AAF9236	BIN on BOLD	BIOUG04799-C04	634	18-May-2012	Trombidiformes	Anystidae	0	Kate Perez	BIN Taxonomy Match	May
GMTPE	GMGRB	GMGRB1079-13	Specimen on BOLD	BIOUG04799-C06	bayw.3	BOLD:AAF9236	BIN on BOLD	BIOUG04799-C06	637	22-May-2012	Trombidiformes	Anystidae	0	Kate Perez	BIN Taxonomy Match	May
GMTPE	GMGRB	GMGRB1080-13	Specimen on BOLD	BIOUG04799-C07	bayw.3	BOLD:AAF9236	BIN on BOLD	BIOUG04799-C07	637	22-May-2012	Trombidiformes	Anystidae	0	Kate Perez	BIN Taxonomy Match	May
GMTPE	GMGRB	GMGRB1081-13	Specimen on BOLD	BIOUG04799-C08	bayw.3	BOLD:AAF9236	BIN on BOLD	BIOUG04799-C08	634	18-May-2012	Trombidiformes	Anystidae	0	Kate Perez	BIN Taxonomy Match	May
GMTPE	GMGRB	GMGRB1082-13	Specimen on BOLD	BIOUG04799-C09	bayw.3	BOLD:AAF9236	BIN on BOLD	BIOUG04799-C09	636	22-May-2012	Trombidiformes	Anystidae	0	Kate Perez	BIN Taxonomy Match	May
GMTPE	GMGRB	GMGRB1083-13	Specimen on BOLD	BIOUG04799-C10	bayw.3	BOLD:AAF9236	BIN on BOLD	BIOUG04799-C10	633	18-May-2012	Trombidiformes	Anystidae	0	Kate Perez	BIN Taxonomy Match	May
GMTPE	GMGRB	GMGRB1084-13	Specimen on BOLD	BIOUG04799-C11	bayw.3	BOLD:AAF9236	BIN on BOLD	BIOUG04799-C11	638	18-May-2012	Trombidiformes	Anystidae	0	Kate Perez	BIN Taxonomy Match	May
GMTPE	GMGRB	GMGRB1088-13	Specimen on BOLD	BIOUG04799-D03	bayw.3	BOLD:AAF9236	BIN on BOLD	BIOUG04799-D03	631	18-May-2012	Trombidiformes	Anystidae	0	Kate Perez	BIN Taxonomy Match	May
GMTPE	GMGRB	GMGRB1089-13	Specimen on BOLD	BIOUG04799-D04	bayw.3	BOLD:AAF9236	BIN on BOLD	BIOUG04799-D04	619	22-May-2012	Trombidiformes	Anystidae	0	Kate Perez	BIN Taxonomy Match	May
GMTPE	GMGRB	GMGRB1090-13	Specimen on BOLD	BIOUG04799-D05	bayw.3	BOLD:AAF9236	BIN on BOLD	BIOUG04799-D05	632	18-May-2012	Trombidiformes	Anystidae	0	Kate Perez	BIN Taxonomy Match	May
GMTPE	GMGRB	GMGRB1093-13	Specimen on BOLD	BIOUG04799-D08	bayw.3	BOLD:AAF9236	BIN on BOLD	BIOUG04799-D08	634	22-May-2012	Trombidiformes	Anystidae	0	Kate Perez	BIN Taxonomy Match	May
GMTPE	GMGRB	GMGRB1097-13	Specimen on BOLD	BIOUG04799-D12	bayw.3	BOLD:AAF9236	BIN on BOLD	BIOUG04799-D12	619	18-May-2012	Trombidiformes	Anystidae	0	Kate Perez	BIN Taxonomy Match	May
GMTPE	GMGRB	GMGRB1988-13	Specimen on BOLD	BIOUG05268-A02	bayw.3	BOLD:AAF9236	BIN on BOLD	BIOUG05268-A02	621	18-May-2012	Trombidiformes	Anystidae	0	Kate Perez	BIN Taxonomy Match	May
GMTPE	GMGRB	GMGRB1993-13	Specimen on BOLD	BIOUG05268-A07	bayw.3	BOLD:AAF9236	BIN on BOLD	BIOUG05268-A07	612	18-May-2012	Trombidiformes	Anystidae	0	Kate Perez	BIN Taxonomy Match	May
GMTPE	GMGRB	GMGRB1998-13	Specimen on BOLD	BIOUG05268-A12	bayw.3	BOLD:AAF9236	BIN on BOLD	BIOUG05268-A12	611	18-May-2012	Trombidiformes	Anystidae	0	Kate Perez	BIN Taxonomy Match	May
GMTPE	GMGRB	GMGRB1999-13	Specimen on BOLD	BIOUG05268-B01	bayw.3	BOLD:AAF9236	BIN on BOLD	BIOUG05268-B01	580	18-May-2012	Trombidiformes	Anystidae	0	Kate Perez	BIN Taxonomy Match	May
GMTPE	GMGRB	GMGRB2017-13	Specimen on BOLD	BIOUG05268-C07	bayw.3	BOLD:AAF9236	BIN on BOLD	BIOUG05268-C07	605	18-May-2012	Trombidiformes	Anystidae	0	Kate Perez	BIN Taxonomy Match	May
GMTPE	GMGRB	GMGRB2019-13	Specimen on BOLD	BIOUG05268-C09	bayw.3	BOLD:AAF9236	BIN on BOLD	BIOUG05268-C09	624	18-May-2012	Trombidiformes	Anystidae	0	Kate Perez	BIN Taxonomy Match	May
GMTPE	GMGRB	GMGRB2022-13	Specimen on BOLD	BIOUG05268-C12	bayw.3	BOLD:AAF9236	BIN on BOLD	BIOUG05268-C12	599	18-May-2012	Trombidiformes	Anystidae	0	Kate Perez	BIN Taxonomy Match	May
GMTPE	GMGRB	GMGRB2026-13	Specimen on BOLD	BIOUG05268-D04	bayw.3	BOLD:AAF9236	BIN on BOLD	BIOUG05268-D04	620	18-May-2012	Trombidiformes	Anystidae	0	Kate Perez	BIN Taxonomy Match	May
GMTPE	GMGRB	GMGRB2031-13	Specimen on BOLD	BIOUG05268-D09	bayw.3	BOLD:AAF9236	BIN on BOLD	BIOUG05268-D09	624	22-May-2012	Trombidiformes	Anystidae	0	Kate Perez	BIN Taxonomy Match	May
GMTPE	GMGRC	GMGRC1115-13	Specimen on BOLD	BIOUG05268-H01	bayw.5	BOLD:AAF9236	BIN on BOLD	BIOUG05268-H01	634	08-Jun-2012	Trombidiformes	Anystidae	0	Kate Perez	BIN Taxonomy Match	June
GMTPE	GMGRC	GMGRC2684-13	Specimen on BOLD	BIOUG05454-B04	bayw.5	BOLD:AAF9236	BIN on BOLD	BIOUG05454-B04	613	08-Jun-2012	Trombidiformes	Anystidae	0	Kate Perez	BIN Taxonomy Match	June
GMTPE	GMGRC	GMGRC2693-13	Specimen on BOLD	BIOUG05454-C01	bayw.5	BOLD:AAF9236	BIN on BOLD	BIOUG05454-C01	510	08-Jun-2012	Trombidiformes	Anystidae	0	Kate Perez	BIN Taxonomy Match	June
GMTPE	GMGRC	GMGRC2694-13	Specimen on BOLD	BIOUG05454-C02	bayw.5	BOLD:AAF9236	BIN on BOLD	BIOUG05454-C02	613	08-Jun-2012	Trombidiformes	Anystidae	0	Kate Perez	BIN Taxonomy Match	June
GMTPE	GMGRC	GMGRC2695-13	Specimen on BOLD	BIOUG05454-C03	bayw.5	BOLD:AAF9236	BIN on BOLD	BIOUG05454-C03	622	08-Jun-2012	Trombidiformes	Anystidae	0	Kate Perez	BIN Taxonomy Match	June
GMTPE	GMGRC	GMGRC2699-13	Specimen on BOLD	BIOUG05454-C07	bayw.5	BOLD:AAF9236	BIN on BOLD	BIOUG05454-C07	567	08-Jun-2012	Trombidiformes	Anystidae	0	Kate Perez	BIN Taxonomy Match	June
GMTPE	GMGRC	GMGRC2700-13	Specimen on BOLD	BIOUG05454-C08	bayw.5	BOLD:AAF9236	BIN on BOLD	BIOUG05454-C08	570	08-Jun-2012	Trombidiformes	Anystidae	0	Kate Perez	BIN Taxonomy Match	June
GMTPE	GMGRC	GMGRC2702-13	Specimen on BOLD	BIOUG05454-C10	bayw.5	BOLD:AAF9236	BIN on BOLD	BIOUG05454-C10	567	08-Jun-2012	Trombidiformes	Anystidae	0	Kate Perez	BIN Taxonomy Match	June
GMTPE	GMGRC	GMGRC2703-13	Specimen on BOLD	BIOUG05454-C11	bayw.5	BOLD:AAF9236	BIN on BOLD	BIOUG05454-C11	573	08-Jun-2012	Trombidiformes	Anystidae	0	Kate Perez	BIN Taxonomy Match	June
GMTPE	GMGRC	GMGRC2704-13	Specimen on BOLD	BIOUG05454-C12	bayw.5	BOLD:AAF9236	BIN on BOLD	BIOUG05454-C12	557	08-Jun-2012	Trombidiformes	Anystidae	0	Kate Perez	BIN Taxonomy Match	June
GMTPE	GMGRC	GMGRC2705-13	Specimen on BOLD	BIOUG05454-D01	bayw.5	BOLD:AAF9236	BIN on BOLD	BIOUG05454-D01	570	08-Jun-2012	Trombidiformes	Anystidae	0	Kate Perez	BIN Taxonomy Match	June
GMTPE	GMGRC	GMGRC2707-13	Specimen on BOLD	BIOUG05454-D03	bayw.5	BOLD:AAF9236	BIN on BOLD	BIOUG05454-D03	519	08-Jun-2012	Trombidiformes	Anystidae	0	Kate Perez	BIN Taxonomy Match	June
GMTPE	GMGRC	GMGRC2739-13	Specimen on BOLD	BIOUG05454-F11	bayw.5	BOLD:AAF9236	BIN on BOLD	BIOUG05454-F11	534	08-Jun-2012	Trombidiformes	Anystidae	0	Kate Perez	BIN Taxonomy Match	June
GMTPE	GMGRC	GMGRC2742-13	Specimen on BOLD	BIOUG05454-G02	bayw.5	BOLD:AAF9236	BIN on BOLD	BIOUG05454-G02	570	08-Jun-2012	Trombidiformes	Anystidae	0	Kate Perez	BIN Taxonomy Match	June
GMTPE	GMGRC	GMGRC2744-13	Specimen on BOLD	BIOUG05454-G04	bayw.5	BOLD:AAF9236	BIN on BOLD	BIOUG05454-G04	570	08-Jun-2012	Trombidiformes	Anystidae	0	Kate Perez	BIN Taxonomy Match	June
GMTPE	GMGRC	GMGRC2745-13	Specimen on BOLD	BIOUG05454-G05	bayw.5	BOLD:AAF9236	BIN on BOLD	BIOUG05454-G05	567	08-Jun-2012	Trombidiformes	Anystidae	0	Kate Perez	BIN Taxonomy Match	June
GMTPE	GMGRC	GMGRC2749-13	Specimen on BOLD	BIOUG05454-G09	bayw.5	BOLD:AAF9236	BIN on BOLD	BIOUG05454-G09	543	08-Jun-2012	Trombidiformes	Anystidae	0	Kate Perez	BIN Taxonomy Match	June
GMTPE	GMGRC	GMGRC2750-13	Specimen on BOLD	BIOUG05454-G10	bayw.5	BOLD:AAF9236	BIN on BOLD	BIOUG05454-G10	566	08-Jun-2012	Trombidiformes	Anystidae	0	Kate Perez	BIN Taxonomy Match	June
GMTPE	GMGRC	GMGRC2751-13	Specimen on BOLD	BIOUG05454-G11	bayw.5	BOLD:AAF9236	BIN on BOLD	BIOUG05454-G11	549	08-Jun-2012	Trombidiformes	Anystidae	0	Kate Perez	BIN Taxonomy Match	June
GMTPE	GMGRC	GMGRC2752-13	Specimen on BOLD	BIOUG05454-G12	bayw.5	BOLD:AAF9236	BIN on BOLD	BIOUG05454-G12	540	08-Jun-2012	Trombidiformes	Anystidae	0	Kate Perez	BIN Taxonomy Match	June
GMTPE	GMGRC	GMGRC2753-13	Specimen on BOLD	BIOUG05454-H01	bayw.5	BOLD:AAF9236	BIN on BOLD	BIOUG05454-H01	564	08-Jun-2012	Trombidiformes	Anystidae	0	Kate Perez	BIN Taxonomy Match	June
GMTPE	GMGRC	GMGRC2756-13	Specimen on BOLD	BIOUG05454-H04	bayw.5	BOLD:AAF9236	BIN on BOLD	BIOUG05454-H04	573	08-Jun-2012	Trombidiformes	Anystidae	0	Kate Perez	BIN Taxonomy Match	June
GMTPE	GMGRC	GMGRC2757-13	Specimen on BOLD	BIOUG05454-H05	bayw.5	BOLD:AAF9236	BIN on BOLD	BIOUG05454-H05	573	08-Jun-2012	Trombidiformes	Anystidae	0	Kate Perez	BIN Taxonomy Match	June
GMTPE	GMGRC	GMGRC2760-13	Specimen on BOLD	BIOUG05454-H08	bayw.5	BOLD:AAF9236	BIN on BOLD	BIOUG05454-H08	561	08-Jun-2012	Trombidiformes	Anystidae	0	Kate Perez	BIN Taxonomy Match	June
GMTPE	GMGRC	GMGRC2761-13	Specimen on BOLD	BIOUG05454-H09	bayw.5	BOLD:AAF9236	BIN on BOLD	BIOUG05454-H09	522	08-Jun-2012	Trombidiformes	Anystidae	0	Kate Perez	BIN Taxonomy Match	June
GMTPE	GMGRD	GMGRD1781-13	Specimen on BOLD	BIOUG05950-A02	bayw.7	BOLD:AAF9236	BIN on BOLD	BIOUG05950-A02	620	20-Jun-2012	Trombidiformes	Anystidae	0	Kate Perez	BIN Taxonomy Match	June
GMTPE	GMGRD	GMGRD1783-13	Specimen on BOLD	BIOUG05950-A04	bayw.7	BOLD:AAF9236	BIN on BOLD	BIOUG05950-A04	611	20-Jun-2012	Trombidiformes	Anystidae	0	Kate Perez	BIN Taxonomy Match	June
GMTPE	GMGRD	GMGRD1784-13	Specimen on BOLD	BIOUG05950-A05	bayw.7	BOLD:AAF9236	BIN on BOLD	BIOUG05950-A05	607	20-Jun-2012	Trombidiformes	Anystidae	0	Kate Perez	BIN Taxonomy Match	June
GMTPE	GMGRD	GMGRD1788-13	Specimen on BOLD	BIOUG05950-A09	bayw.7	BOLD:AAF9236	BIN on BOLD	BIOUG05950-A09	611	20-Jun-2012	Trombidiformes	Anystidae	0	Kate Perez	BIN Taxonomy Match	June
GMTPE	GMGRD	GMGRD1789-13	Specimen on BOLD	BIOUG05950-A10	bayw.7	BOLD:AAF9236	BIN on BOLD	BIOUG05950-A10	633	20-Jun-2012	Trombidiformes	Anystidae	0	Kate Perez	BIN Taxonomy Match	June
GMTPE	GMGRD	GMGRD1792-13	Specimen on BOLD	BIOUG05950-B01	bayw.7	BOLD:AAF9236	BIN on BOLD	BIOUG05950-B01	611	20-Jun-2012	Trombidiformes	Anystidae	0	Kate Perez	BIN Taxonomy Match	June
GMTPE	GMGRD	GMGRD1799-13	Specimen on BOLD	BIOUG05950-B08	bayw.7	BOLD:AAF9236	BIN on BOLD	BIOUG05950-B08	608	20-Jun-2012	Trombidiformes	Anystidae	0	Kate Perez	BIN Taxonomy Match	June
GMTPE	GMGRD	GMGRD1800-13	Specimen on BOLD	BIOUG05950-B09	bayw.7	BOLD:AAF9236	BIN on BOLD	BIOUG05950-B09	613	20-Jun-2012	Trombidiformes	Anystidae	0	Kate Perez	BIN Taxonomy Match	June
GMTPE	GMGRD	GMGRD1804-13	Specimen on BOLD	BIOUG05950-C01	bayw.7	BOLD:AAF9236	BIN on BOLD	BIOUG05950-C01	613	20-Jun-2012	Trombidiformes	Anystidae	0	Kate Perez	BIN Taxonomy Match	June
GMTPE	GMGRD	GMGRD1805-13	Specimen on BOLD	BIOUG05950-C02	bayw.7	BOLD:AAF9236	BIN on BOLD	BIOUG05950-C02	619	20-Jun-2012	Trombidiformes	Anystidae	0	Kate Perez	BIN Taxonomy Match	June
GMTPE	GMGRD	GMGRD1806-13	Specimen on BOLD	BIOUG05950-C03	bayw.7	BOLD:AAF9236	BIN on BOLD	BIOUG05950-C03	613	20-Jun-2012	Trombidiformes	Anystidae	0	Kate Perez	BIN Taxonomy Match	June
GMTPE	GMGRD	GMGRD1808-13	Specimen on BOLD	BIOUG05950-C05	bayw.7	BOLD:AAF9236	BIN on BOLD	BIOUG05950-C05	595	20-Jun-2012	Trombidiformes	Anystidae	0	Kate Perez	BIN Taxonomy Match	June
GMTPE	GMGRD	GMGRD1811-13	Specimen on BOLD	BIOUG05950-C08	bayw.7	BOLD:AAF9236	BIN on BOLD	BIOUG05950-C08	617	20-Jun-2012	Trombidiformes	Anystidae	0	Kate Perez	BIN Taxonomy Match	June
GMTPE	GMGRD	GMGRD1870-13	Specimen on BOLD	BIOUG05950-H07	bayw.7	BOLD:AAF9236	BIN on BOLD	BIOUG05950-H07	594	20-Jun-2012	Trombidiformes	Anystidae	0	Kate Perez	BIN Taxonomy Match	June
GMTPE	GMGRD	GMGRD1871-13	Specimen on BOLD	BIOUG05950-H08	bayw.7	BOLD:AAF9236	BIN on BOLD	BIOUG05950-H08	612	20-Jun-2012	Trombidiformes	Anystidae	0	Kate Perez	BIN Taxonomy Match	June
GMTPE	GMGRD	GMGRD3502-13	Specimen on BOLD	BIOUG06063-A01	bayw.7	BOLD:AAF9236	BIN on BOLD	BIOUG06063-A01	627	20-Jun-2012	Trombidiformes	Anystidae	0	Kate Perez	BIN Taxonomy Match	June
GMTPE	GMGRD	GMGRD3503-13	Specimen on BOLD	BIOUG06063-A02	bayw.7	BOLD:AAF9236	BIN on BOLD	BIOUG06063-A02	627	20-Jun-2012	Trombidiformes	Anystidae	0	Kate Perez	BIN Taxonomy Match	June
GMTPE	GMGRD	GMGRD3504-13	Specimen on BOLD	BIOUG06063-A03	bayw.7	BOLD:AAF9236	BIN on BOLD	BIOUG06063-A03	611	20-Jun-2012	Trombidiformes	Anystidae	0	Kate Perez	BIN Taxonomy Match	June
GMTPE	GMGRD	GMGRD3505-13	Specimen on BOLD	BIOUG06063-A04	bayw.7	BOLD:AAF9236	BIN on BOLD	BIOUG06063-A04	517	20-Jun-2012	Trombidiformes	Anystidae	0	Kate Perez	BIN Taxonomy Match	June
GMTPE	GMGRD	GMGRD3507-13	Specimen on BOLD	BIOUG06063-A06	bayw.7	BOLD:AAF9236	BIN on BOLD	BIOUG06063-A06	602	20-Jun-2012	Trombidiformes	Anystidae	0	Kate Perez	BIN Taxonomy Match	June
GMTPE	GMGRD	GMGRD3508-13	Specimen on BOLD	BIOUG06063-A07	bayw.7	BOLD:AAF9236	BIN on BOLD	BIOUG06063-A07	610	20-Jun-2012	Trombidiformes	Anystidae	0	Kate Perez	BIN Taxonomy Match	June
GMTPE	GMGRD	GMGRD3509-13	Specimen on BOLD	BIOUG06063-A08	bayw.7	BOLD:AAF9236	BIN on BOLD	BIOUG06063-A08	564	20-Jun-2012	Trombidiformes	Anystidae	0	Kate Perez	BIN Taxonomy Match	June
GMTPE	GMGRD	GMGRD3510-13	Specimen on BOLD	BIOUG06063-A09	bayw.7	BOLD:AAF9236	BIN on BOLD	BIOUG06063-A09	613	20-Jun-2012	Trombidiformes	Anystidae	0	Kate Perez	BIN Taxonomy Match	June
GMTPE	GMGRD	GMGRD3511-13	Specimen on BOLD	BIOUG06063-A10	bayw.7	BOLD:AAF9236	BIN on BOLD	BIOUG06063-A10	615	20-Jun-2012	Trombidiformes	Anystidae	0	Kate Perez	BIN Taxonomy Match	June
GMTPE	GMGRD	GMGRD3512-13	Specimen on BOLD	BIOUG06063-A11	bayw.7	BOLD:AAF9236	BIN on BOLD	BIOUG06063-A11	602	20-Jun-2012	Trombidiformes	Anystidae	0	Kate Perez	BIN Taxonomy Match	June
GMTPE	GMGRD	GMGRD3514-13	Specimen on BOLD	BIOUG06063-B01	bayw.7	BOLD:AAF9236	BIN on BOLD	BIOUG06063-B01	627	20-Jun-2012	Trombidiformes	Anystidae	0	Kate Perez	BIN Taxonomy Match	June
GMTPE	GMGRD	GMGRD3515-13	Specimen on BOLD	BIOUG06063-B02	bayw.7	BOLD:AAF9236	BIN on BOLD	BIOUG06063-B02	567	20-Jun-2012	Trombidiformes	Anystidae	0	Kate Perez	BIN Taxonomy Match	June
GMTPE	GMGRD	GMGRD3516-13	Specimen on BOLD	BIOUG06063-B03	bayw.7	BOLD:AAF9236	BIN on BOLD	BIOUG06063-B03	571	20-Jun-2012	Trombidiformes	Anystidae	0	Kate Perez	BIN Taxonomy Match	June
GMTPE	GMGRD	GMGRD3517-13	Specimen on BOLD	BIOUG06063-B04	bayw.7	BOLD:AAF9236	BIN on BOLD	BIOUG06063-B04	606	20-Jun-2012	Trombidiformes	Anystidae	0	Kate Perez	BIN Taxonomy Match	June
GMTPE	GMGRD	GMGRD3518-13	Specimen on BOLD	BIOUG06063-B05	bayw.7	BOLD:AAF9236	BIN on BOLD	BIOUG06063-B05	608	20-Jun-2012	Trombidiformes	Anystidae	0	Kate Perez	BIN Taxonomy Match	June
GMTPE	GMGRD	GMGRD3519-13	Specimen on BOLD	BIOUG06063-B06	bayw.7	BOLD:AAF9236	BIN on BOLD	BIOUG06063-B06	617	20-Jun-2012	Trombidiformes	Anystidae	0	Kate Perez	BIN Taxonomy Match	June
GMTPE	GMGRD	GMGRD3520-13	Specimen on BOLD	BIOUG06063-B07	bayw.7	BOLD:AAF9236	BIN on BOLD	BIOUG06063-B07	613	20-Jun-2012	Trombidiformes	Anystidae	0	Kate Perez	BIN Taxonomy Match	June
GMTPE	GMGRD	GMGRD3522-13	Specimen on BOLD	BIOUG06063-B09	bayw.7	BOLD:AAF9236	BIN on BOLD	BIOUG06063-B09	596	20-Jun-2012	Trombidiformes	Anystidae	0	Kate Perez	BIN Taxonomy Match	June
GMTPE	GMGRD	GMGRD3523-13	Specimen on BOLD	BIOUG06063-B10	bayw.7	BOLD:AAF9236	BIN on BOLD	BIOUG06063-B10	612	20-Jun-2012	Trombidiformes	Anystidae	0	Kate Perez	BIN Taxonomy Match	June
GMTPE	GMGRD	GMGRD3526-13	Specimen on BOLD	BIOUG06063-C01	bayw.7	BOLD:AAF9236	BIN on BOLD	BIOUG06063-C01	602	20-Jun-2012	Trombidiformes	Anystidae	0	Kate Perez	BIN Taxonomy Match	June
GMTPE	GMGRD	GMGRD3527-13	Specimen on BOLD	BIOUG06063-C02	bayw.7	BOLD:AAF9236	BIN on BOLD	BIOUG06063-C02	600	20-Jun-2012	Trombidiformes	Anystidae	0	Kate Perez	BIN Taxonomy Match	June
GMTPE	GMGRD	GMGRD3528-13	Specimen on BOLD	BIOUG06063-C03	bayw.7	BOLD:AAF9236	BIN on BOLD	BIOUG06063-C03	626	20-Jun-2012	Trombidiformes	Anystidae	0	Kate Perez	BIN Taxonomy Match	June
GMTPE	GMGRD	GMGRD3529-13	Specimen on BOLD	BIOUG06063-C04	bayw.7	BOLD:AAF9236	BIN on BOLD	BIOUG06063-C04	603	20-Jun-2012	Trombidiformes	Anystidae	0	Kate Perez	BIN Taxonomy Match	June
GMTPE	GMGRD	GMGRD3530-13	Specimen on BOLD	BIOUG06063-C05	bayw.7	BOLD:AAF9236	BIN on BOLD	BIOUG06063-C05	612	20-Jun-2012	Trombidiformes	Anystidae	0	Kate Perez	BIN Taxonomy Match	June
GMTPE	GMGRD	GMGRD3531-13	Specimen on BOLD	BIOUG06063-C06	bayw.7	BOLD:AAF9236	BIN on BOLD	BIOUG06063-C06	620	20-Jun-2012	Trombidiformes	Anystidae	0	Kate Perez	BIN Taxonomy Match	June
GMTPE	GMGRD	GMGRD3535-13	Specimen on BOLD	BIOUG06063-C10	bayw.7	BOLD:AAF9236	BIN on BOLD	BIOUG06063-C10	607	20-Jun-2012	Trombidiformes	Anystidae	0	Kate Perez	BIN Taxonomy Match	June
GMTPE	GMGRD	GMGRD3536-13	Specimen on BOLD	BIOUG06063-C11	bayw.7	BOLD:AAF9236	BIN on BOLD	BIOUG06063-C11	626	20-Jun-2012	Trombidiformes	Anystidae	0	Kate Perez	BIN Taxonomy Match	June
GMTPE	GMGRD	GMGRD3538-13	Specimen on BOLD	BIOUG06063-D01	bayw.7	BOLD:AAF9236	BIN on BOLD	BIOUG06063-D01	607	20-Jun-2012	Trombidiformes	Anystidae	0	Kate Perez	BIN Taxonomy Match	June
GMTPE	GMGRD	GMGRD3539-13	Specimen on BOLD	BIOUG06063-D02	bayw.7	BOLD:AAF9236	BIN on BOLD	BIOUG06063-D02	610	20-Jun-2012	Trombidiformes	Anystidae	0	Kate Perez	BIN Taxonomy Match	June
GMTPE	GMGRD	GMGRD3540-13	Specimen on BOLD	BIOUG06063-D03	bayw.7	BOLD:AAF9236	BIN on BOLD	BIOUG06063-D03	564	20-Jun-2012	Trombidiformes	Anystidae	0	Kate Perez	BIN Taxonomy Match	June
GMTPE	GMGRD	GMGRD3541-13	Specimen on BOLD	BIOUG06063-D04	bayw.7	BOLD:AAF9236	BIN on BOLD	BIOUG06063-D04	607	20-Jun-2012	Trombidiformes	Anystidae	0	Kate Perez	BIN Taxonomy Match	June
GMTPE	GMGRD	GMGRD3543-13	Specimen on BOLD	BIOUG06063-D06	bayw.7	BOLD:AAF9236	BIN on BOLD	BIOUG06063-D06	627	20-Jun-2012	Trombidiformes	Anystidae	0	Kate Perez	BIN Taxonomy Match	June
GMTPE	GMGRD	GMGRD3544-13	Specimen on BOLD	BIOUG06063-D07	bayw.7	BOLD:AAF9236	BIN on BOLD	BIOUG06063-D07	611	20-Jun-2012	Trombidiformes	Anystidae	0	Kate Perez	BIN Taxonomy Match	June
GMTPE	GMGRD	GMGRD3546-13	Specimen on BOLD	BIOUG06063-D09	bayw.7	BOLD:AAF9236	BIN on BOLD	BIOUG06063-D09	467	20-Jun-2012	Trombidiformes	Anystidae	0	Kate Perez	BIN Taxonomy Match	June
GMTPE	GMGRD	GMGRD3547-13	Specimen on BOLD	BIOUG06063-D10	bayw.7	BOLD:AAF9236	BIN on BOLD	BIOUG06063-D10	611	20-Jun-2012	Trombidiformes	Anystidae	0	Kate Perez	BIN Taxonomy Match	June
GMTPE	GMGRD	GMGRD3548-13	Specimen on BOLD	BIOUG06063-D11	bayw.7	BOLD:AAF9236	BIN on BOLD	BIOUG06063-D11	615	20-Jun-2012	Trombidiformes	Anystidae	0	Kate Perez	BIN Taxonomy Match	June
GMTPE	GMGRD	GMGRD3549-13	Specimen on BOLD	BIOUG06063-D12	bayw.7	BOLD:AAF9236	BIN on BOLD	BIOUG06063-D12	612	20-Jun-2012	Trombidiformes	Anystidae	0	Kate Perez	BIN Taxonomy Match	June
GMTPE	GMGRD	GMGRD3550-13	Specimen on BOLD	BIOUG06063-E01	bayw.7	BOLD:AAF9236	BIN on BOLD	BIOUG06063-E01	605	20-Jun-2012	Trombidiformes	Anystidae	0	Kate Perez	BIN Taxonomy Match	June
GMTPE	GMGRD	GMGRD3551-13	Specimen on BOLD	BIOUG06063-E02	bayw.7	BOLD:AAF9236	BIN on BOLD	BIOUG06063-E02	603	20-Jun-2012	Trombidiformes	Anystidae	0	Kate Perez	BIN Taxonomy Match	June
GMTPE	GMGRD	GMGRD3552-13	Specimen on BOLD	BIOUG06063-E03	bayw.7	BOLD:AAF9236	BIN on BOLD	BIOUG06063-E03	594	20-Jun-2012	Trombidiformes	Anystidae	0	Kate Perez	BIN Taxonomy Match	June
GMTPE	GMGRD	GMGRD3554-13	Specimen on BOLD	BIOUG06063-E05	bayw.7	BOLD:AAF9236	BIN on BOLD	BIOUG06063-E05	609	20-Jun-2012	Trombidiformes	Anystidae	0	Kate Perez	BIN Taxonomy Match	June
GMTPE	GMGRD	GMGRD3555-13	Specimen on BOLD	BIOUG06063-E06	bayw.7	BOLD:AAF9236	BIN on BOLD	BIOUG06063-E06	608	20-Jun-2012	Trombidiformes	Anystidae	0	Kate Perez	BIN Taxonomy Match	June
GMTPE	GMGRD	GMGRD3556-13	Specimen on BOLD	BIOUG06063-E07	bayw.7	BOLD:AAF9236	BIN on BOLD	BIOUG06063-E07	623	20-Jun-2012	Trombidiformes	Anystidae	0	Kate Perez	BIN Taxonomy Match	June
GMTPE	GMGRD	GMGRD3557-13	Specimen on BOLD	BIOUG06063-E08	bayw.7	BOLD:AAF9236	BIN on BOLD	BIOUG06063-E08	597	20-Jun-2012	Trombidiformes	Anystidae	0	Kate Perez	BIN Taxonomy Match	June
GMTPE	GMGRD	GMGRD3561-13	Specimen on BOLD	BIOUG06063-E12	bayw.7	BOLD:AAF9236	BIN on BOLD	BIOUG06063-E12	611	20-Jun-2012	Trombidiformes	Anystidae	0	Kate Perez	BIN Taxonomy Match	June
GMTPE	GMGRD	GMGRD3589-13	Specimen on BOLD	BIOUG06063-H04	bayw.7	BOLD:AAF9236	BIN on BOLD	BIOUG06063-H04	618	20-Jun-2012	Trombidiformes	Anystidae	0	Kate Perez	BIN Taxonomy Match	June
GMTPE	GMGRE	GMGRE3213-13	Specimen on BOLD	BIOUG06278-B05	bayw.9	BOLD:AAF9236	BIN on BOLD	BIOUG06278-B05	602	04-Jul-2012	Trombidiformes	Anystidae	0	Kate Perez	BIN Taxonomy Match	July
GMTPE	GMGRE	GMGRE3221-13	Specimen on BOLD	BIOUG06278-C01	bayw.9	BOLD:AAF9236	BIN on BOLD	BIOUG06278-C01	625	04-Jul-2012	Trombidiformes	Anystidae	0	Kate Perez	BIN Taxonomy Match	July
GMTPE	GMGRE	GMGRE3256-13	Specimen on BOLD	BIOUG06278-E12	bayw.9	BOLD:AAF9236	BIN on BOLD	BIOUG06278-E12	616	04-Jul-2012	Trombidiformes	Anystidae	0	Kate Perez	BIN Taxonomy Match	July
GMTPE	GMGRF	GMGRF5476-13	Specimen on BOLD	BIOUG07417-A01	bayw.11	BOLD:AAF9236	BIN on BOLD	BIOUG07417-A01	593	25-Jul-2012	Trombidiformes	Anystidae	0	Kate Perez	BIN Taxonomy Match	July
GMTPE	GMGRF	GMGRF5479-13	Specimen on BOLD	BIOUG07417-A04	bayw.11	BOLD:AAF9236	BIN on BOLD	BIOUG07417-A04	583	25-Jul-2012	Trombidiformes	Anystidae	0	Kate Perez	BIN Taxonomy Match	July
GMTPE	GMGRF	GMGRF5481-13	Specimen on BOLD	BIOUG07417-A06	bayw.11	BOLD:AAF9236	BIN on BOLD	BIOUG07417-A06	578	25-Jul-2012	Trombidiformes	Anystidae	0	Kate Perez	BIN Taxonomy Match	July
GMTPE	GMGRF	GMGRF5483-13	Specimen on BOLD	BIOUG07417-A08	bayw.11	BOLD:AAF9236	BIN on BOLD	BIOUG07417-A08	593	25-Jul-2012	Trombidiformes	Anystidae	0	Kate Perez	BIN Taxonomy Match	July
GMTPE	GMGRF	GMGRF5484-13	Specimen on BOLD	BIOUG07417-A09	bayw.11	BOLD:AAF9236	BIN on BOLD	BIOUG07417-A09	614	25-Jul-2012	Trombidiformes	Anystidae	0	Kate Perez	BIN Taxonomy Match	July
GMTPE	GMGRF	GMGRF5487-13	Specimen on BOLD	BIOUG07417-A12	bayw.11	BOLD:AAF9236	BIN on BOLD	BIOUG07417-A12	558	25-Jul-2012	Trombidiformes	Anystidae	0	Kate Perez	BIN Taxonomy Match	July
GMTPE	GMGRF	GMGRF5488-13	Specimen on BOLD	BIOUG07417-B01	bayw.11	BOLD:AAF9236	BIN on BOLD	BIOUG07417-B01	595	25-Jul-2012	Trombidiformes	Anystidae	0	Kate Perez	BIN Taxonomy Match	July
GMTPE	GMGRF	GMGRF5490-13	Specimen on BOLD	BIOUG07417-B03	bayw.11	BOLD:AAF9236	BIN on BOLD	BIOUG07417-B03	595	25-Jul-2012	Trombidiformes	Anystidae	0	Kate Perez	BIN Taxonomy Match	July
GMTPE	GMGRF	GMGRF5491-13	Specimen on BOLD	BIOUG07417-B04	bayw.11	BOLD:AAF9236	BIN on BOLD	BIOUG07417-B04	574	25-Jul-2012	Trombidiformes	Anystidae	0	Kate Perez	BIN Taxonomy Match	July
GMTPE	GMGRF	GMGRF5492-13	Specimen on BOLD	BIOUG07417-B05	bayw.11	BOLD:AAF9236	BIN on BOLD	BIOUG07417-B05	597	25-Jul-2012	Trombidiformes	Anystidae	0	Kate Perez	BIN Taxonomy Match	July
GMTPE	GMGRF	GMGRF5493-13	Specimen on BOLD	BIOUG07417-B06	bayw.11	BOLD:AAF9236	BIN on BOLD	BIOUG07417-B06	579	25-Jul-2012	Trombidiformes	Anystidae	0	Kate Perez	BIN Taxonomy Match	July
GMTPE	GMGRF	GMGRF5494-13	Specimen on BOLD	BIOUG07417-B07	bayw.11	BOLD:AAF9236	BIN on BOLD	BIOUG07417-B07	577	25-Jul-2012	Trombidiformes	Anystidae	0	Kate Perez	BIN Taxonomy Match	July
GMTPE	GMGRF	GMGRF5495-13	Specimen on BOLD	BIOUG07417-B08	bayw.11	BOLD:AAF9236	BIN on BOLD	BIOUG07417-B08	624	25-Jul-2012	Trombidiformes	Anystidae	0	Kate Perez	BIN Taxonomy Match	July
GMTPE	GMGRF	GMGRF5496-13	Specimen on BOLD	BIOUG07417-B09	bayw.11	BOLD:AAF9236	BIN on BOLD	BIOUG07417-B09	560	25-Jul-2012	Trombidiformes	Anystidae	0	Kate Perez	BIN Taxonomy Match	July
GMTPE	GMGRF	GMGRF5497-13	Specimen on BOLD	BIOUG07417-B10	bayw.11	BOLD:AAF9236	BIN on BOLD	BIOUG07417-B10	591	25-Jul-2012	Trombidiformes	Anystidae	0	Kate Perez	BIN Taxonomy Match	July
GMTPE	GMGRF	GMGRF5498-13	Specimen on BOLD	BIOUG07417-B11	bayw.11	BOLD:AAF9236	BIN on BOLD	BIOUG07417-B11	595	25-Jul-2012	Trombidiformes	Anystidae	0	Kate Perez	BIN Taxonomy Match	July
GMTPE	GMGRF	GMGRF5499-13	Specimen on BOLD	BIOUG07417-B12	bayw.11	BOLD:AAF9236	BIN on BOLD	BIOUG07417-B12	583	25-Jul-2012	Trombidiformes	Anystidae	0	Kate Perez	BIN Taxonomy Match	July
GMTPE	GMGRF	GMGRF5500-13	Specimen on BOLD	BIOUG07417-C01	bayw.11	BOLD:AAF9236	BIN on BOLD	BIOUG07417-C01	592	25-Jul-2012	Trombidiformes	Anystidae	0	Kate Perez	BIN Taxonomy Match	July
GMTPE	GMGRF	GMGRF5501-13	Specimen on BOLD	BIOUG07417-C02	bayw.11	BOLD:AAF9236	BIN on BOLD	BIOUG07417-C02	579	25-Jul-2012	Trombidiformes	Anystidae	0	Kate Perez	BIN Taxonomy Match	July
GMTPE	GMGRF	GMGRF5502-13	Specimen on BOLD	BIOUG07417-C03	bayw.11	BOLD:AAF9236	BIN on BOLD	BIOUG07417-C03	567	25-Jul-2012	Trombidiformes	Anystidae	0	Kate Perez	BIN Taxonomy Match	July
GMTPE	GMGRF	GMGRF5503-13	Specimen on BOLD	BIOUG07417-C04	bayw.11	BOLD:AAF9236	BIN on BOLD	BIOUG07417-C04	606	25-Jul-2012	Trombidiformes	Anystidae	0	Kate Perez	BIN Taxonomy Match	July
GMTPE	GMGRF	GMGRF5504-13	Specimen on BOLD	BIOUG07417-C05	bayw.11	BOLD:AAF9236	BIN on BOLD	BIOUG07417-C05	601	25-Jul-2012	Trombidiformes	Anystidae	0	Kate Perez	BIN Taxonomy Match	July
GMTPE	GMGRF	GMGRF5505-13	Specimen on BOLD	BIOUG07417-C06	bayw.11	BOLD:AAF9236	BIN on BOLD	BIOUG07417-C06	563	25-Jul-2012	Trombidiformes	Anystidae	0	Kate Perez	BIN Taxonomy Match	July
GMTPE	GMGRF	GMGRF5506-13	Specimen on BOLD	BIOUG07417-C07	bayw.11	BOLD:AAF9236	BIN on BOLD	BIOUG07417-C07	566	25-Jul-2012	Trombidiformes	Anystidae	0	Kate Perez	BIN Taxonomy Match	July
GMTPE	GMGRF	GMGRF5507-13	Specimen on BOLD	BIOUG07417-C08	bayw.11	BOLD:AAF9236	BIN on BOLD	BIOUG07417-C08	555	25-Jul-2012	Trombidiformes	Anystidae	0	Kate Perez	BIN Taxonomy Match	July
GMTPE	GMGRF	GMGRF5526-13	Specimen on BOLD	BIOUG07417-E03	bayw.11	BOLD:AAF9236	BIN on BOLD	BIOUG07417-E03	525	25-Jul-2012	Trombidiformes	Anystidae	0	Kate Perez	BOLD ID Engine Manual	July
GMTPE	GMGRG	GMGRG3917-13	Specimen on BOLD	BIOUG07417-F08	bayw.13	BOLD:AAF9236	BIN on BOLD	BIOUG07417-F08	582	12-Aug-2012	Trombidiformes	Anystidae	0	Kate Perez	BIN Taxonomy Match	August
GMTPE	GMGRG	GMGRG3918-13	Specimen on BOLD	BIOUG07417-F09	bayw.13	BOLD:AAF9236	BIN on BOLD	BIOUG07417-F09	597	12-Aug-2012	Trombidiformes	Anystidae	0	Kate Perez	BIN Taxonomy Match	August
GMTPE	GMGRG	GMGRG3922-13	Specimen on BOLD	BIOUG07417-G01	bayw.13	BOLD:AAF9236	BIN on BOLD	BIOUG07417-G01	582	12-Aug-2012	Trombidiformes	Anystidae	0	Kate Perez	BIN Taxonomy Match	August
GMTPE	GMGRG	GMGRG3923-13	Specimen on BOLD	BIOUG07417-G02	bayw.13	BOLD:AAF9236	BIN on BOLD	BIOUG07417-G02	592	12-Aug-2012	Trombidiformes	Anystidae	0	Kate Perez	BIN Taxonomy Match	August
GMTPE	GMGRG	GMGRG3929-13	Specimen on BOLD	BIOUG07417-G08	bayw.13	BOLD:AAF9236	BIN on BOLD	BIOUG07417-G08	564	12-Aug-2012	Trombidiformes	Anystidae	0	Kate Perez	BIN Taxonomy Match	August
GMTPE	GMGRG	GMGRG3933-13	Specimen on BOLD	BIOUG07417-G12	bayw.13	BOLD:AAF9236	BIN on BOLD	BIOUG07417-G12	589	12-Aug-2012	Trombidiformes	Anystidae	0	Kate Perez	BIN Taxonomy Match	August
GMTPE	GMGRA	GMGRA1381-13	Specimen on BOLD	BIOUG04489-G05	bayw.1	BOLD:ACF9019	BIN on BOLD	BIOUG04489-G05	658	04-May-2012	Trombidiformes	Erythraeidae	Abrolophus	Kate Perez	BIN Taxonomy Match	May
GMTPE	GMGRA	GMGRA1385-13	Specimen on BOLD	BIOUG04489-G09	bayw.1	BOLD:ACF9695	BIN on BOLD	BIOUG04489-G09	658	04-May-2012	Trombidiformes	Bdellidae	0	Kate Perez	BIN Taxonomy Match	May
GMTPE	GMGRD	GMGRD1837-13	Specimen on BOLD	BIOUG05950-E10	bayw.7	BOLD:ACG4776	BIN on BOLD	BIOUG05950-E10	615	20-Jun-2012	Trombidiformes	Hygrobatidae	0	Kate Perez	BIN Taxonomy Match	June
GMTPE	GMGRD	GMGRD3563-13	Specimen on BOLD	BIOUG06063-F02	bayw.7	BOLD:ACG4776	BIN on BOLD	BIOUG06063-F02	611	20-Jun-2012	Trombidiformes	Hygrobatidae	0	Kate Perez	BIN Taxonomy Match	June
GMTPE	GMGRD	GMGRD3564-13	Specimen on BOLD	BIOUG06063-F03	bayw.7	BOLD:ACG4776	BIN on BOLD	BIOUG06063-F03	614	20-Jun-2012	Trombidiformes	Hygrobatidae	0	Kate Perez	BIN Taxonomy Match	June
GMTPE	GMGRD	GMGRD3587-13	Specimen on BOLD	BIOUG06063-H02	bayw.7	BOLD:ACG4776	BIN on BOLD	BIOUG06063-H02	612	20-Jun-2012	Trombidiformes	Hygrobatidae	0	Kate Perez	BIN Taxonomy Match	June
GMTPE	GMGRD	GMGRD1853-13	Specimen on BOLD	BIOUG05950-G02	bayw.7	BOLD:ACG5272	BIN on BOLD	BIOUG05950-G02	605	20-Jun-2012	Trombidiformes	0	0	Monica R. Young		June
GMTPE	GMGRD	GMGRD3562-13	Specimen on BOLD	BIOUG06063-F01	bayw.7	BOLD:ACI4906	BIN on BOLD	BIOUG06063-F01	627	20-Jun-2012	Trombidiformes	Hydryphantidae	0	Kate Perez	BIN Taxonomy Match	June
GMTPE	GMGRF	GMGRF5508-13	Specimen on BOLD	BIOUG07417-C09	bayw.11	BOLD:ACJ5086	BIN on BOLD	BIOUG07417-C09	658	25-Jul-2012	Trombidiformes	Erythraeidae	0	Kate Perez	BIN Taxonomy Match	July
GMTPE	GMGRG	GMGRG3927-13	Specimen on BOLD	BIOUG07417-G06	bayw.13	BOLD:ACJ5086	BIN on BOLD	BIOUG07417-G06	658	12-Aug-2012	Trombidiformes	Erythraeidae	0	Kate Perez	BIN Taxonomy Match	August
GMTPE	GMGRH	GMGRH2684-13	Specimen on BOLD	BIOUG08361-A03	bayw.15	BOLD:ACJ5086	BIN on BOLD	BIOUG08361-A03	658	03-Sep-2012	Trombidiformes	Erythraeidae	0	Kate Perez	BIN Taxonomy Match	September
GMTPE	GMGRD	GMGRD1796-13	Specimen on BOLD	BIOUG05950-B05	bayw.7	BOLD:ACM6751	BIN on BOLD	BIOUG05950-B05	466	20-Jun-2012	Trombidiformes	Anystidae	0	Kate Perez	BOLD ID Engine Manual	June
GMTPE	GMGRF	GMGRF5528-13	Specimen on BOLD	BIOUG07417-E05	bayw.11	BOLD:ACN9808	BIN on BOLD	BIOUG07417-E05	526	25-Jul-2012	Trombidiformes	Lebertiidae	0	Kate Perez	BOLD ID Engine Manual	July
GMTPZ	GMGMK	GMGMK1522-14	Specimen on BOLD	BIOUG17226-F11	GMP#06026	BOLD:ACR4310	BIN on BOLD	BIOUG17226-F11	563	17-Jun-2014	Trombidiformes	Erythraeidae	0	Monica R. Young	Digital Morphology	June
GMTPZ	GMGMK	GMGMK1523-14	Specimen on BOLD	BIOUG17226-F12	GMP#06026	BOLD:ACR4310	BIN on BOLD	BIOUG17226-F12	633	17-Jun-2014	Trombidiformes	Erythraeidae	0	Monica R. Young	Digital Morphology	June
GMTPZ	GMGML	GMGML1080-14	Specimen on BOLD	BIOUG17268-H01		BOLD:ACR4310	BIN on BOLD	BIOUG17268-H01	658	01-Jul-2014	Trombidiformes	Erythraeidae	0	Monica R. Young	Digital Morphology	July
GMTPZ	GMGML	GMGML1081-14	Specimen on BOLD	BIOUG17268-H02		BOLD:ACR4310	BIN on BOLD	BIOUG17268-H02	579	01-Jul-2014	Trombidiformes	Erythraeidae	0	Monica R. Young	Digital Morphology	July
GMTPZ	GMGML	GMGML1083-14	Specimen on BOLD	BIOUG17268-H04	GMP#06027	BOLD:ACR4310	BIN on BOLD	BIOUG17268-H04	588	01-Jul-2014	Trombidiformes	Erythraeidae	0	Monica R. Young	Digital Morphology	July
GMTPZ	GMGML	GMGML1085-14	Specimen on BOLD	BIOUG17268-H06		BOLD:ACR4310	BIN on BOLD	BIOUG17268-H06	588	01-Jul-2014	Trombidiformes	Erythraeidae	0	Monica R. Young	Digital Morphology	July
GMTPZ	GMGMM	GMGMM1523-14	Specimen on BOLD	BIOUG17379-G10	GMP#06028	BOLD:ACR4310	BIN on BOLD	BIOUG17379-G10	588	15-Jul-2014	Trombidiformes	Erythraeidae	0	Monica R. Young	Digital Morphology	July
GMTPZ	GMGMJ	GMGMJ1492-14	Specimen on BOLD	BIOUG17099-E12	GMP#06025	BOLD:ACR4641	BIN on BOLD	BIOUG17099-E12	658	02-Jun-2014	Trombidiformes	Pygmephoridae	0	Monica R. Young	BOLD ID Engine Manual	June
GMTPZ	GMGMJ	GMGMJ1493-14	Specimen on BOLD	BIOUG17099-F01	GMP#06025	BOLD:ACR4641	BIN on BOLD	BIOUG17099-F01	658	02-Jun-2014	Trombidiformes	Pygmephoridae	0	Monica R. Young	BOLD ID Engine Manual	June
GMTPZ	GMGMA	GMGMA1544-14	Specimen on BOLD	BIOUG16267-B05	GMP#06015	BOLD:AAD1254	BIN on BOLD	BIOUG16267-B05	591	25-Jul-2013	Trichoptera	Hydropsychidae	Hydropsyche	Kate Perez	BIN Taxonomy Match	July
GMTPZ	GMGMA	GMGMA520-14	Specimen on BOLD	BIOUG16210-D02	GMP#06015	BOLD:AAD1254	BIN on BOLD	BIOUG16210-D02	608	25-Jul-2013	Trichoptera	Hydropsychidae	Hydropsyche	Kate Perez	BIN Taxonomy Match	July
GMTPZ	GMGMC	GMGMC854-14	Specimen on BOLD	BIOUG16522-B02	GMP#06016	BOLD:AAD1254	BIN on BOLD	BIOUG16522-B02	597	08-Aug-2013	Trichoptera	Hydropsychidae	Hydropsyche	Kate Perez	BIN Taxonomy Match	August
GMTPZ	GMGMI	GMGMI1054-14	Specimen on BOLD	BIOUG17118-A04	GMP#06024	BOLD:AAD1254	BIN on BOLD	BIOUG17118-A04	582	16-May-2014	Trichoptera	Hydropsychidae	Hydropsyche	Kate Perez	BIN Taxonomy Match	May
GMTPZ	GMGMI	GMGMI268-14	Specimen on BOLD	BIOUG17086-G01	GMP#06024	BOLD:AAI0072	BIN on BOLD	BIOUG17086-G01	546	16-May-2014	Trichoptera	Limnephilidae	Stenophylax	Kate Perez	BIN Taxonomy Match	May
GMTPE	GMGRF	GMGRF5351-13	Specimen on BOLD	BIOUG06956-H06	bayw.11	BOLD:AAN9105	BIN on BOLD	BIOUG06956-H06	634	25-Jul-2012	Thysanoptera	Thripidae	Thrips	Kate Perez	BIN Taxonomy Match	July
GMTPE	GMGRC	GMGRC2176-13	Specimen on BOLD	BIOUG04482-G02	bayw.5	BOLD:ABY1863	BIN on BOLD	BIOUG04482-G02	646	08-Jun-2012	Thysanoptera	Phlaeothripidae	0	Kate Perez	BIN Taxonomy Match	June
GMTPE	GMGRF	GMGRF5346-13	Specimen on BOLD	BIOUG06956-H01	bayw.11	BOLD:ABY1863	BIN on BOLD	BIOUG06956-H01	589	25-Jul-2012	Thysanoptera	Phlaeothripidae	0	Kate Perez	BOLD ID Engine Manual	July
GMTPE	GMGRF	GMGRF5347-13	Specimen on BOLD	BIOUG06956-H02	bayw.11	BOLD:ABY1863	BIN on BOLD	BIOUG06956-H02	617	25-Jul-2012	Thysanoptera	Phlaeothripidae	0	Kate Perez	BOLD ID Engine Manual	July
GMTPE	GMGRD	GMGRD3685-13	Specimen on BOLD	BIOUG06066-A07	bayw.7	BOLD:ACD0145	BIN on BOLD	BIOUG06066-A07	565	20-Jun-2012	Thysanoptera	Phlaeothripidae	0	Kate Perez	BIN Taxonomy Match	June
GMTPE	GMGRD	GMGRD3689-13	Specimen on BOLD	BIOUG06066-A11	bayw.7	BOLD:ACD0145	BIN on BOLD	BIOUG06066-A11	580	20-Jun-2012	Thysanoptera	Phlaeothripidae	0	Kate Perez	BIN Taxonomy Match	June
GMTPE	GMGRE	GMGRE2925-13	Specimen on BOLD	BIOUG06066-G10	bayw.9	BOLD:ACD0145	BIN on BOLD	BIOUG06066-G10	539	04-Jul-2012	Thysanoptera	Phlaeothripidae	0	Kate Perez	BIN Taxonomy Match	July
GMTPE	GMGRF	GMGRF5312-13	Specimen on BOLD	BIOUG06956-E03	bayw.11	BOLD:ACD0145	BIN on BOLD	BIOUG06956-E03	646	25-Jul-2012	Thysanoptera	Phlaeothripidae	0	Kate Perez	BIN Taxonomy Match	July
GMTPE	GMGRF	GMGRF5348-13	Specimen on BOLD	BIOUG06956-H03	bayw.11	BOLD:ACD0145	BIN on BOLD	BIOUG06956-H03	613	25-Jul-2012	Thysanoptera	Phlaeothripidae	0	Kate Perez	BIN Taxonomy Match	July
GMTPE	GMGRF	GMGRF5349-13	Specimen on BOLD	BIOUG06956-H04	bayw.11	BOLD:ACD0145	BIN on BOLD	BIOUG06956-H04	620	25-Jul-2012	Thysanoptera	Phlaeothripidae	0	Kate Perez	BIN Taxonomy Match	July
GMTPE	GMGRF	GMGRF5350-13	Specimen on BOLD	BIOUG06956-H05	bayw.11	BOLD:ACD0145	BIN on BOLD	BIOUG06956-H05	620	25-Jul-2012	Thysanoptera	Phlaeothripidae	0	Kate Perez	BIN Taxonomy Match	July
GMTPE	GMGRG	GMGRG4016-13	Specimen on BOLD	BIOUG07947-E01	bayw.13	BOLD:ACD0145	BIN on BOLD	BIOUG07947-E01	562	12-Aug-2012	Thysanoptera	Phlaeothripidae	0	Kate Perez	BIN Taxonomy Match	August
GMTPE	GMGRG	GMGRG4018-13	Specimen on BOLD	BIOUG07947-E03	bayw.13	BOLD:ACD0145	BIN on BOLD	BIOUG07947-E03	512	12-Aug-2012	Thysanoptera	Phlaeothripidae	0	Kate Perez	BIN Taxonomy Match	August
GMTPE	GMGRC	GMGRC2865-13	Specimen on BOLD	BIOUG05489-B12	bayw.5	BOLD:ACG4914	BIN on BOLD	BIOUG05489-B12	618	08-Jun-2012	Thysanoptera	Thripidae	0	Kate Perez	BIN Taxonomy Match	June
GMTPE	GMGRD	GMGRD3686-13	Specimen on BOLD	BIOUG06066-A08	bayw.7	BOLD:ACG4914	BIN on BOLD	BIOUG06066-A08	566	20-Jun-2012	Thysanoptera	Thripidae	0	Kate Perez	BIN Taxonomy Match	June
GMTPE	GMGRE	GMGRE2904-13	Specimen on BOLD	BIOUG06066-F01	bayw.9	BOLD:ACG4914	BIN on BOLD	BIOUG06066-F01	606	04-Jul-2012	Thysanoptera	Thripidae	0	Kate Perez	BIN Taxonomy Match	July
GMTPE	GMGRE	GMGRE2924-13	Specimen on BOLD	BIOUG06066-G09	bayw.9	BOLD:ACG4914	BIN on BOLD	BIOUG06066-G09	566	04-Jul-2012	Thysanoptera	Thripidae	0	Kate Perez	BIN Taxonomy Match	July
GMTPE	GMGRC	GMGRC2844-13	Specimen on BOLD	BIOUG05489-A03	bayw.5	BOLD:ACG4845	BIN on BOLD	BIOUG05489-A03	612	08-Jun-2012	Symphypleona	0	0	Kate Perez	BOLD ID Engine Manual	June
GMTPE	GMGRF	GMGRF5334-13	Specimen on BOLD	BIOUG06956-G01	bayw.11	BOLD:ACG4845	BIN on BOLD	BIOUG06956-G01	603	25-Jul-2012	Symphypleona	0	0	Kate Perez	BOLD ID Engine Manual	July
GMTPE	GMGRF	GMGRF5335-13	Specimen on BOLD	BIOUG06956-G02	bayw.11	BOLD:ACG4845	BIN on BOLD	BIOUG06956-G02	605	25-Jul-2012	Symphypleona	0	0	Kate Perez	BOLD ID Engine Manual	July
GMTPE	GMGRF	GMGRF5336-13	Specimen on BOLD	BIOUG06956-G03	bayw.11	BOLD:ACG4845	BIN on BOLD	BIOUG06956-G03	545	25-Jul-2012	Symphypleona	0	0	Kate Perez	BOLD ID Engine Manual	July
GMTPE	GMGRG	GMGRG4022-13	Specimen on BOLD	BIOUG07947-E07	bayw.13	BOLD:ACG4845	BIN on BOLD	BIOUG07947-E07	617	12-Aug-2012	Symphypleona	0	0	Kate Perez	BOLD ID Engine Manual	August
GMTPE	GMGRG	GMGRG4024-13	Specimen on BOLD	BIOUG07947-E09	bayw.13	BOLD:ACG4845	BIN on BOLD	BIOUG07947-E09	617	12-Aug-2012	Symphypleona	0	0	Kate Perez	BOLD ID Engine Manual	August
GMTPE	GMGRG	GMGRG4026-13	Specimen on BOLD	BIOUG07947-E11	bayw.13	BOLD:ACG4845	BIN on BOLD	BIOUG07947-E11	608	12-Aug-2012	Symphypleona	0	0	Kate Perez	BOLD ID Engine Manual	August
GMTPE	GMGRG	GMGRG4044-13	Specimen on BOLD	BIOUG07947-G05	bayw.13	BOLD:ACG4845	BIN on BOLD	BIOUG07947-G05	579	12-Aug-2012	Symphypleona	0	0	Kate Perez	BOLD ID Engine Manual	August
GMTPE	GMGRH	GMGRH1996-13	Specimen on BOLD	BIOUG07420-H02	bayw.15	BOLD:ACG4845	BIN on BOLD	BIOUG07420-H02	559	03-Sep-2012	Symphypleona	0	0	Kate Perez	BOLD ID Engine Manual	September
GMTPE	GMGRH	GMGRH2697-13	Specimen on BOLD	BIOUG08361-B04	bayw.15	BOLD:ACG4845	BIN on BOLD	BIOUG08361-B04	544	03-Sep-2012	Symphypleona	0	0	Kate Perez	BOLD ID Engine Manual	September
GMTPE	GMGRG	GMGRG4025-13	Specimen on BOLD	BIOUG07947-E10	bayw.13	BOLD:ACJ5322	BIN on BOLD	BIOUG07947-E10	546	12-Aug-2012	Symphypleona	Dicyrtomidae	0	Kate Perez	BIN Taxonomy Match	August
GMTPE	GMGRH	GMGRH1995-13	Specimen on BOLD	BIOUG07420-H01	bayw.15	BOLD:ACJ5488	BIN on BOLD	BIOUG07420-H01	658	03-Sep-2012	Symphypleona	0	0	Kate Perez	BOLD ID Engine Manual	September
GMTPE	GMGRF	GMGRF5480-13	Specimen on BOLD	BIOUG07417-A05	bayw.11	BOLD:ACC6079	BIN on BOLD	BIOUG07417-A05	594	25-Jul-2012	Sarcoptiformes	Ceratozetidae	0	Monica R. Young		July
GMTPE	GMGRF	GMGRF5523-13	Specimen on BOLD	BIOUG07417-D12	bayw.11	BOLD:ACC6079	BIN on BOLD	BIOUG07417-D12	571	25-Jul-2012	Sarcoptiformes	Ceratozetidae	0	Monica R. Young		July
GMTPE	GMGRB	GMGRB1143-13	Specimen on BOLD	BIOUG04799-H10	bayw.3	BOLD:ACF7351	BIN on BOLD	BIOUG04799-H10	632	22-May-2012	Sarcoptiformes	0	0	Kate Perez	BIN Taxonomy Match	May
GMTPE	GMGRD	GMGRD1802-13	Specimen on BOLD	BIOUG05950-B11	bayw.7	BOLD:ACG5108	BIN on BOLD	BIOUG05950-B11	628	20-Jun-2012	Sarcoptiformes	Oribatulidae	0	Kate Perez	BIN Taxonomy Match	June
GMTPE	GMGRD	GMGRD1817-13	Specimen on BOLD	BIOUG05950-D02	bayw.7	BOLD:ACG5271	BIN on BOLD	BIOUG05950-D02	593	20-Jun-2012	Sarcoptiformes	0	0	Kate Perez	BIN Taxonomy Match	June
GMTPE	GMGRD	GMGRD1848-13	Specimen on BOLD	BIOUG05950-F09	bayw.7	BOLD:ACG5273	BIN on BOLD	BIOUG05950-F09	634	20-Jun-2012	Sarcoptiformes	0	0	Kate Perez	BIN Taxonomy Match	June
GMTPE	GMGRG	GMGRG3935-13	Specimen on BOLD	BIOUG07417-H02	bayw.13	BOLD:ACJ4883	BIN on BOLD	BIOUG07417-H02	658	12-Aug-2012	Sarcoptiformes	0	0	Monica R. Young		August
GMTPE	GMGRF	GMGRF5516-13	Specimen on BOLD	BIOUG07417-D05	bayw.11	BOLD:ACJ5489	BIN on BOLD	BIOUG07417-D05	658	25-Jul-2012	Sarcoptiformes	Galumnidae	Pergalumna	Kate Perez	BIN Taxonomy Match	July
GMTPZ	GMGMJ	GMGMJ1468-14	Specimen on BOLD	BIOUG17099-C12	GMP#06025	BOLD:AAY6680	BIN on BOLD	BIOUG17099-C12	576	02-Jun-2014	Psocoptera	Ectopsocidae	Ectopsocus	Kate Perez	BIN Taxonomy Match	June
GMTPZ	GMGML	GMGML1077-14	Specimen on BOLD	BIOUG17268-G10	GMP#06027	BOLD:AAY6680	BIN on BOLD	BIOUG17268-G10	576	01-Jul-2014	Psocoptera	Ectopsocidae	Ectopsocus	Kate Perez	BIN Taxonomy Match	July
GMTPZ	GMGMM	GMGMM1507-14	Specimen on BOLD	BIOUG17379-F06	GMP#06028	BOLD:AAY6680	BIN on BOLD	BIOUG17379-F06	588	15-Jul-2014	Psocoptera	Ectopsocidae	Ectopsocus	Kate Perez	BIN Taxonomy Match	July
GMTPZ	GMGMM	GMGMM1508-14	Specimen on BOLD	BIOUG17379-F07	GMP#06028	BOLD:AAY6680	BIN on BOLD	BIOUG17379-F07	588	15-Jul-2014	Psocoptera	Ectopsocidae	Ectopsocus	Kate Perez	BIN Taxonomy Match	July
GMTPZ	GMGMC	GMGMC1430-14	Specimen on BOLD	BIOUG16528-G11	GMP#06016	BOLD:ACR3866	BIN on BOLD	BIOUG16528-G11	591	08-Aug-2013	Psocoptera	Caeciliusidae	Valenzuela	Kate Perez	BIN Taxonomy Match	August
GMTPZ	GMGMI	GMGMI968-14	Specimen on BOLD	BIOUG17117-B01	GMP#06024	BOLD:ACR3866	BIN on BOLD	BIOUG17117-B01	528	16-May-2014	Psocoptera	Caeciliusidae	Valenzuela	Kate Perez	BIN Taxonomy Match	May
GMTPE	GMGRG	GMGRG4010-13	Specimen on BOLD	BIOUG07947-D07	bayw.13	BOLD:ACR3866	BIN on BOLD	BIOUG07947-D07	536	12-Aug-2012	Psocoptera	Caeciliusidae	Valenzuela	Kate Perez	BIN Taxonomy Match	August
GMTPZ	GMGMJ	GMGMJ1488-14	Specimen on BOLD	BIOUG17099-E08	GMP#06025	BOLD:ACR4420	BIN on BOLD	BIOUG17099-E08	620	02-Jun-2014	Pseudoscorpiones	Chernetidae	0	Kate Perez	BOLD ID Engine Manual	June
GMTPZ	GMGMJ	GMGMJ1489-14	Specimen on BOLD	BIOUG17099-E09	GMP#06025	BOLD:ACR4421	BIN on BOLD	BIOUG17099-E09	627	02-Jun-2014	Pseudoscorpiones	Chernetidae	0	Kate Perez	BOLD ID Engine Manual	June
GMTPZ	GMGMD	GMGMD231-14	Specimen on BOLD	BIOUG16607-G03	GMP#06018	BOLD:AAC5779	BIN on BOLD	BIOUG16607-G03	555	16-Sep-2013	Orthoptera	Acrididae	0	Kate Perez	BOLD ID Engine Manual	September
GMTPZ	GMGMK	GMGMK017-14	Specimen on BOLD	BIOUG17071-C09	GMP#06026	BOLD:AAC5779	BIN on BOLD	BIOUG17071-C09	561	17-Jun-2014	Orthoptera	Acrididae	0	Kate Perez	BOLD ID Engine Manual	June
GMTPZ	GMGML	GMGML066-14	Specimen on BOLD	BIOUG17228-F02	GMP#06027	BOLD:AAC5779	BIN on BOLD	BIOUG17228-F02	537	01-Jul-2014	Orthoptera	Acrididae	0	Kate Perez	BOLD ID Engine Manual	July
GMTPZ	GMGML	GMGML1212-14	Specimen on BOLD	BIOUG17266-C03	GMP#06027	BOLD:AAC5779	BIN on BOLD	BIOUG17266-C03	622	01-Jul-2014	Orthoptera	Acrididae	0	Kate Perez	BOLD ID Engine Manual	July
GMTPZ	GMGML	GMGML1214-14	Specimen on BOLD	BIOUG17266-C05	GMP#06027	BOLD:AAC5779	BIN on BOLD	BIOUG17266-C05	622	01-Jul-2014	Orthoptera	Acrididae	0	Kate Perez	BOLD ID Engine Manual	July
GMTPZ	GMGMN	GMGMN240-14	Specimen on BOLD	BIOUG17382-H10	GMP#06029	BOLD:AAC5779	BIN on BOLD	BIOUG17382-H10	564	29-Jul-2014	Orthoptera	Acrididae	0	Kate Perez	BOLD ID Engine Manual	July
GMTPZ	GMGMD	GMGMD232-14	Specimen on BOLD	BIOUG16607-G04	GMP#06018	BOLD:AAL3938	BIN on BOLD	BIOUG16607-G04	588	16-Sep-2013	Orthoptera	Acrididae	0	Kate Perez	BOLD ID Engine Manual	September
GMTPZ	GMGMM	GMGMM290-14	Specimen on BOLD	BIOUG17299-A03	GMP#06028	BOLD:AAL3938	BIN on BOLD	BIOUG17299-A03	534	15-Jul-2014	Orthoptera	Acrididae	0	Kate Perez	BOLD ID Engine Manual	July
GMTPZ	GMGMD	GMGMD1074-14	Specimen on BOLD	BIOUG16616-F03	GMP#06018	BOLD:AAB0373	BIN on BOLD	BIOUG16616-F03	543	16-Sep-2013	Neuroptera	Chrysopidae	Chrysoperla	Kate Perez	BIN Taxonomy Match	September
GMTPZ	GMGMD	GMGMD374-14	Specimen on BOLD	BIOUG16609-C04	GMP#06018	BOLD:AAB0373	BIN on BOLD	BIOUG16609-C04	579	16-Sep-2013	Neuroptera	Chrysopidae	Chrysoperla	Kate Perez	BIN Taxonomy Match	September
GMTPZ	GMGMJ	GMGMJ876-14	Specimen on BOLD	BIOUG17093-B02	GMP#06025	BOLD:AAB0373	BIN on BOLD	BIOUG17093-B02	538	02-Jun-2014	Neuroptera	Chrysopidae	Chrysoperla	Kate Perez	BIN Taxonomy Match	June
GMTPZ	GMGMK	GMGMK1113-14	Specimen on BOLD	BIOUG17222-D06	GMP#06026	BOLD:AAB0373	BIN on BOLD	BIOUG17222-D06	594	17-Jun-2014	Neuroptera	Chrysopidae	Chrysoperla	Kate Perez	BIN Taxonomy Match	June
GMTPZ	GMGMK	GMGMK1114-14	Specimen on BOLD	BIOUG17222-D07	GMP#06026	BOLD:AAB0373	BIN on BOLD	BIOUG17222-D07	588	17-Jun-2014	Neuroptera	Chrysopidae	Chrysoperla	Kate Perez	BIN Taxonomy Match	June
GMTPZ	GMGML	GMGML1215-14	Specimen on BOLD	BIOUG17266-C06	GMP#06027	BOLD:AAB0373	BIN on BOLD	BIOUG17266-C06	633	01-Jul-2014	Neuroptera	Chrysopidae	Chrysoperla	Kate Perez	BIN Taxonomy Match	July
GMTPZ	GMGMM	GMGMM1000-14	Specimen on BOLD	BIOUG17374-C10	GMP#06028	BOLD:AAB0373	BIN on BOLD	BIOUG17374-C10	588	15-Jul-2014	Neuroptera	Chrysopidae	Chrysoperla	Kate Perez	BIN Taxonomy Match	July
GMTPZ	GMGMM	GMGMM335-14	Specimen on BOLD	BIOUG17299-D12	GMP#06028	BOLD:AAB0373	BIN on BOLD	BIOUG17299-D12	564	15-Jul-2014	Neuroptera	Chrysopidae	Chrysoperla	Kate Perez	BIN Taxonomy Match	July
GMTPZ	GMGMA	GMGMA1557-14	Specimen on BOLD	BIOUG16268-A12	GMP#06015	BOLD:AAG0892	BIN on BOLD	BIOUG16268-A12	608	25-Jul-2013	Neuroptera	Hemerobiidae	Hemerobius	Kate Perez	BIN Taxonomy Match	July
GMTPZ	GMGMN	GMGMN1129-14	Specimen on BOLD	BIOUG17445-A02	GMP#06029	BOLD:AAG0892	BIN on BOLD	BIOUG17445-A02	555	29-Jul-2014	Neuroptera	Hemerobiidae	Hemerobius	Kate Perez	BIN Taxonomy Match	July
GMTPZ	GMGMN	GMGMN1130-14	Specimen on BOLD	BIOUG17445-A03	GMP#06029	BOLD:AAG0892	BIN on BOLD	BIOUG17445-A03	564	29-Jul-2014	Neuroptera	Hemerobiidae	Hemerobius	Kate Perez	BIN Taxonomy Match	July
GMTPZ	GMGMN	GMGMN1128-14	Specimen on BOLD	BIOUG17445-A01	GMP#06029	BOLD:AAP2910	BIN on BOLD	BIOUG17445-A01	588	29-Jul-2014	Neuroptera	Hemerobiidae	Hemerobius	Kate Perez	BIN Taxonomy Match	July
GMTPZ	GMGMI	GMGMI963-14	Specimen on BOLD	BIOUG17117-A08	GMP#06024	BOLD:AAU4144	BIN on BOLD	BIOUG17117-A08	533	16-May-2014	Neuroptera	Coniopterygidae	Coniopteryx	Kate Perez	BIN Taxonomy Match	May
GMTPE	GMGRF	GMGRF5525-13	Specimen on BOLD	BIOUG07417-E02	bayw.11	BOLD:AAH6490	BIN on BOLD	BIOUG07417-E02	523	25-Jul-2012	Mesostigmata	Ascidae	0	Monica R. Young		July
GMTPE	GMGRH	GMGRH1898-13	Specimen on BOLD	BIOUG07417-H09	bayw.15	BOLD:AAH6490	BIN on BOLD	BIOUG07417-H09	600	03-Sep-2012	Mesostigmata	Ascidae	0	Monica R. Young		September
GMTPE	GMGRH	GMGRH1899-13	Specimen on BOLD	BIOUG07417-H10	bayw.15	BOLD:AAH6490	BIN on BOLD	BIOUG07417-H10	576	03-Sep-2012	Mesostigmata	Ascidae	0	Monica R. Young		September
GMTPE	GMGRH	GMGRH1900-13	Specimen on BOLD	BIOUG07417-H11	bayw.15	BOLD:AAH6490	BIN on BOLD	BIOUG07417-H11	585	03-Sep-2012	Mesostigmata	Ascidae	0	Monica R. Young		September
GMTPE	GMGRH	GMGRH2682-13	Specimen on BOLD	BIOUG08361-A01	bayw.15	BOLD:AAH6490	BIN on BOLD	BIOUG08361-A01	564	03-Sep-2012	Mesostigmata	Ascidae	0	Monica R. Young		September
GMTPE	GMGRH	GMGRH2683-13	Specimen on BOLD	BIOUG08361-A02	bayw.15	BOLD:AAH6490	BIN on BOLD	BIOUG08361-A02	565	03-Sep-2012	Mesostigmata	Ascidae	0	Monica R. Young		September
GMTPE	GMGRH	GMGRH2686-13	Specimen on BOLD	BIOUG08361-A05	bayw.15	BOLD:AAH6490	BIN on BOLD	BIOUG08361-A05	555	03-Sep-2012	Mesostigmata	Ascidae	0	Monica R. Young		September
GMTPE	GMGRI	GMGRI846-13	Specimen on BOLD	BIOUG08370-C09	bayw.17	BOLD:AAH6490	BIN on BOLD	BIOUG08370-C09	555	22-Sep-2012	Mesostigmata	Ascidae	0	Monica R. Young		September
GMTPE	GMGRC	GMGRC2687-13	Specimen on BOLD	BIOUG05454-B07	bayw.5	BOLD:AAN6706	BIN on BOLD	BIOUG05454-B07	658	08-Jun-2012	Mesostigmata	Ascidae	0	Kate Perez	BIN Taxonomy Match	June
GMTPE	GMGRC	GMGRC2740-13	Specimen on BOLD	BIOUG05454-F12	bayw.5	BOLD:AAN6706	BIN on BOLD	BIOUG05454-F12	588	08-Jun-2012	Mesostigmata	Ascidae	0	Kate Perez	BIN Taxonomy Match	June
GMTPE	GMGRH	GMGRH1897-13	Specimen on BOLD	BIOUG07417-H08	bayw.15	BOLD:ABV8662	BIN on BOLD	BIOUG07417-H08	658	03-Sep-2012	Mesostigmata	Phytoseiidae	0	Kate Perez	BIN Taxonomy Match	September
GMTPE	GMGRB	GMGRB1128-13	Specimen on BOLD	BIOUG04799-G07	bayw.3	BOLD:ACC7936	BIN on BOLD	BIOUG04799-G07	631	18-May-2012	Mesostigmata	Microgyniidae	0	Kate Perez	BIN Taxonomy Match	May
GMTPE	GMGRC	GMGRC2729-13	Specimen on BOLD	BIOUG05454-F01	bayw.5	BOLD:ACC7936	BIN on BOLD	BIOUG05454-F01	658	08-Jun-2012	Mesostigmata	Microgyniidae	0	Kate Perez	BIN Taxonomy Match	June
GMTPE	GMGRD	GMGRD1815-13	Specimen on BOLD	BIOUG05950-C12	bayw.7	BOLD:ACC7936	BIN on BOLD	BIOUG05950-C12	607	20-Jun-2012	Mesostigmata	Microgyniidae	0	Kate Perez	BIN Taxonomy Match	June
GMTPE	GMGRD	GMGRD1825-13	Specimen on BOLD	BIOUG05950-D10	bayw.7	BOLD:ACC7936	BIN on BOLD	BIOUG05950-D10	626	20-Jun-2012	Mesostigmata	Microgyniidae	0	Kate Perez	BIN Taxonomy Match	June
GMTPE	GMGRD	GMGRD3567-13	Specimen on BOLD	BIOUG06063-F06	bayw.7	BOLD:ACC7936	BIN on BOLD	BIOUG06063-F06	516	20-Jun-2012	Mesostigmata	Microgyniidae	0	Kate Perez	BIN Taxonomy Match	June
GMTPE	GMGRA	GMGRA1384-13	Specimen on BOLD	BIOUG04489-G08	bayw.1	BOLD:ACC8566	BIN on BOLD	BIOUG04489-G08	658	04-May-2012	Mesostigmata	Digamasellidae	0	Kate Perez	BIN Taxonomy Match	May
GMTPE	GMGRB	GMGRB2023-13	Specimen on BOLD	BIOUG05268-D01	bayw.3	BOLD:ACC8566	BIN on BOLD	BIOUG05268-D01	632	22-May-2012	Mesostigmata	Digamasellidae	0	Kate Perez	BIN Taxonomy Match	May
GMTPE	GMGRB	GMGRB1110-13	Specimen on BOLD	BIOUG04799-F01	bayw.3	BOLD:ACF6329	BIN on BOLD	BIOUG04799-F01	628	18-May-2012	Mesostigmata	Parasitidae	0	Kate Perez	BIN Taxonomy Match	May
GMTPE	GMGRB	GMGRB1096-13	Specimen on BOLD	BIOUG04799-D11	bayw.3	BOLD:ACF7352	BIN on BOLD	BIOUG04799-D11	632	18-May-2012	Mesostigmata	Ascidae	0	Kate Perez	BIN Taxonomy Match	May
GMTPE	GMGRH	GMGRH2690-13	Specimen on BOLD	BIOUG08361-A09	bayw.15	BOLD:ACF7352	BIN on BOLD	BIOUG08361-A09	658	03-Sep-2012	Mesostigmata	Ascidae	0	Kate Perez	BIN Taxonomy Match	September
GMTPZ	GMGMK	GMGMK1524-14	Specimen on BOLD	BIOUG17226-G01	GMP#06026	BOLD:ACF8205	BIN on BOLD	BIOUG17226-G01	618	17-Jun-2014	Mesostigmata	Parasitidae	0	Kate Perez	BOLD ID Engine Manual	June
GMTPE	GMGRA	GMGRA1389-13	Specimen on BOLD	BIOUG04489-H01	bayw.1	BOLD:ACF8205	BIN on BOLD	BIOUG04489-H01	658	04-May-2012	Mesostigmata	Parasitidae	0	Kate Perez	BIN Taxonomy Match	May
GMTPE	GMGRB	GMGRB1114-13	Specimen on BOLD	BIOUG04799-F05	bayw.3	BOLD:ACF8205	BIN on BOLD	BIOUG04799-F05	630	18-May-2012	Mesostigmata	Parasitidae	0	Kate Perez	BIN Taxonomy Match	May
GMTPE	GMGRB	GMGRB1132-13	Specimen on BOLD	BIOUG04799-G11	bayw.3	BOLD:ACF8205	BIN on BOLD	BIOUG04799-G11	616	18-May-2012	Mesostigmata	Parasitidae	0	Kate Perez	BIN Taxonomy Match	May
GMTPE	GMGRD	GMGRD1782-13	Specimen on BOLD	BIOUG05950-A03	bayw.7	BOLD:ACF8205	BIN on BOLD	BIOUG05950-A03	610	20-Jun-2012	Mesostigmata	Parasitidae	0	Kate Perez	BIN Taxonomy Match	June
GMTPE	GMGRD	GMGRD1790-13	Specimen on BOLD	BIOUG05950-A11	bayw.7	BOLD:ACF8205	BIN on BOLD	BIOUG05950-A11	602	20-Jun-2012	Mesostigmata	Parasitidae	0	Kate Perez	BIN Taxonomy Match	June
GMTPE	GMGRD	GMGRD3521-13	Specimen on BOLD	BIOUG06063-B08	bayw.7	BOLD:ACF8205	BIN on BOLD	BIOUG06063-B08	627	20-Jun-2012	Mesostigmata	Parasitidae	0	Kate Perez	BIN Taxonomy Match	June
GMTPE	GMGRB	GMGRB1061-13	Specimen on BOLD	BIOUG04799-A12	bayw.3	BOLD:ACF8577	BIN on BOLD	BIOUG04799-A12	633	18-May-2012	Mesostigmata	Digamasellidae	0	Kate Perez	BOLD ID Engine Manual	May
GMTPE	GMGRB	GMGRB1062-13	Specimen on BOLD	BIOUG04799-B01	bayw.3	BOLD:ACF8577	BIN on BOLD	BIOUG04799-B01	633	18-May-2012	Mesostigmata	Digamasellidae	0	Kate Perez	BOLD ID Engine Manual	May
GMTPE	GMGRB	GMGRB1063-13	Specimen on BOLD	BIOUG04799-B02	bayw.3	BOLD:ACF8577	BIN on BOLD	BIOUG04799-B02	632	18-May-2012	Mesostigmata	Digamasellidae	0	Kate Perez	BOLD ID Engine Manual	May
GMTPE	GMGRB	GMGRB1064-13	Specimen on BOLD	BIOUG04799-B03	bayw.3	BOLD:ACF8577	BIN on BOLD	BIOUG04799-B03	635	18-May-2012	Mesostigmata	Digamasellidae	0	Kate Perez	BOLD ID Engine Manual	May
GMTPE	GMGRB	GMGRB1065-13	Specimen on BOLD	BIOUG04799-B04	bayw.3	BOLD:ACF8577	BIN on BOLD	BIOUG04799-B04	637	22-May-2012	Mesostigmata	Digamasellidae	0	Kate Perez	BOLD ID Engine Manual	May
GMTPE	GMGRB	GMGRB1066-13	Specimen on BOLD	BIOUG04799-B05	bayw.3	BOLD:ACF8577	BIN on BOLD	BIOUG04799-B05	635	22-May-2012	Mesostigmata	Digamasellidae	0	Kate Perez	BOLD ID Engine Manual	May
GMTPE	GMGRB	GMGRB1067-13	Specimen on BOLD	BIOUG04799-B06	bayw.3	BOLD:ACF8577	BIN on BOLD	BIOUG04799-B06	633	18-May-2012	Mesostigmata	Digamasellidae	0	Kate Perez	BOLD ID Engine Manual	May
GMTPE	GMGRB	GMGRB1068-13	Specimen on BOLD	BIOUG04799-B07	bayw.3	BOLD:ACF8577	BIN on BOLD	BIOUG04799-B07	633	18-May-2012	Mesostigmata	Digamasellidae	0	Kate Perez	BOLD ID Engine Manual	May
GMTPE	GMGRB	GMGRB1069-13	Specimen on BOLD	BIOUG04799-B08	bayw.3	BOLD:ACF8577	BIN on BOLD	BIOUG04799-B08	632	18-May-2012	Mesostigmata	Digamasellidae	0	Kate Perez	BOLD ID Engine Manual	May
GMTPE	GMGRB	GMGRB1071-13	Specimen on BOLD	BIOUG04799-B10	bayw.3	BOLD:ACF8577	BIN on BOLD	BIOUG04799-B10	633	18-May-2012	Mesostigmata	Digamasellidae	0	Kate Perez	BOLD ID Engine Manual	May
GMTPE	GMGRB	GMGRB1072-13	Specimen on BOLD	BIOUG04799-B11	bayw.3	BOLD:ACF8577	BIN on BOLD	BIOUG04799-B11	635	18-May-2012	Mesostigmata	Digamasellidae	0	Kate Perez	BOLD ID Engine Manual	May
GMTPE	GMGRB	GMGRB1073-13	Specimen on BOLD	BIOUG04799-B12	bayw.3	BOLD:ACF8577	BIN on BOLD	BIOUG04799-B12	628	18-May-2012	Mesostigmata	Digamasellidae	0	Kate Perez	BOLD ID Engine Manual	May
GMTPE	GMGRB	GMGRB1086-13	Specimen on BOLD	BIOUG04799-D01	bayw.3	BOLD:ACF8577	BIN on BOLD	BIOUG04799-D01	635	18-May-2012	Mesostigmata	Digamasellidae	0	Kate Perez	BOLD ID Engine Manual	May
GMTPE	GMGRB	GMGRB1087-13	Specimen on BOLD	BIOUG04799-D02	bayw.3	BOLD:ACF8577	BIN on BOLD	BIOUG04799-D02	632	18-May-2012	Mesostigmata	Digamasellidae	0	Kate Perez	BOLD ID Engine Manual	May
GMTPE	GMGRB	GMGRB2010-13	Specimen on BOLD	BIOUG05268-B12	bayw.3	BOLD:ACF8577	BIN on BOLD	BIOUG05268-B12	658	18-May-2012	Mesostigmata	Digamasellidae	0	Kate Perez	BOLD ID Engine Manual	May
GMTPE	GMGRB	GMGRB2024-13	Specimen on BOLD	BIOUG05268-D02	bayw.3	BOLD:ACF8577	BIN on BOLD	BIOUG05268-D02	633	18-May-2012	Mesostigmata	Digamasellidae	0	Kate Perez	BOLD ID Engine Manual	May
GMTPE	GMGRB	GMGRB2025-13	Specimen on BOLD	BIOUG05268-D03	bayw.3	BOLD:ACF8577	BIN on BOLD	BIOUG05268-D03	633	18-May-2012	Mesostigmata	Digamasellidae	0	Kate Perez	BOLD ID Engine Manual	May
GMTPE	GMGRB	GMGRB2035-13	Specimen on BOLD	BIOUG05268-E01	bayw.3	BOLD:ACF8577	BIN on BOLD	BIOUG05268-E01	634	18-May-2012	Mesostigmata	Digamasellidae	0	Kate Perez	BOLD ID Engine Manual	May
GMTPE	GMGRB	GMGRB2036-13	Specimen on BOLD	BIOUG05268-E02	bayw.3	BOLD:ACF8577	BIN on BOLD	BIOUG05268-E02	658	22-May-2012	Mesostigmata	Digamasellidae	0	Kate Perez	BOLD ID Engine Manual	May
GMTPE	GMGRB	GMGRB2040-13	Specimen on BOLD	BIOUG05268-E06	bayw.3	BOLD:ACF8577	BIN on BOLD	BIOUG05268-E06	632	18-May-2012	Mesostigmata	Digamasellidae	0	Kate Perez	BOLD ID Engine Manual	May
GMTPE	GMGRB	GMGRB1070-13	Specimen on BOLD	BIOUG04799-B09	bayw.3	BOLD:ACF8578	BIN on BOLD	BIOUG04799-B09	600	22-May-2012	Mesostigmata	Digamasellidae	0	Kate Perez	BIN Taxonomy Match	May
GMTPE	GMGRB	GMGRB1111-13	Specimen on BOLD	BIOUG04799-F02	bayw.3	BOLD:ACF8578	BIN on BOLD	BIOUG04799-F02	632	18-May-2012	Mesostigmata	Digamasellidae	0	Kate Perez	BIN Taxonomy Match	May
GMTPE	GMGRB	GMGRB2029-13	Specimen on BOLD	BIOUG05268-D07	bayw.3	BOLD:ACF8578	BIN on BOLD	BIOUG05268-D07	620	22-May-2012	Mesostigmata	Digamasellidae	0	Kate Perez	BIN Taxonomy Match	May
GMTPE	GMGRA	GMGRA1383-13	Specimen on BOLD	BIOUG04489-G07	bayw.1	BOLD:ACF9018	BIN on BOLD	BIOUG04489-G07	658	08-May-2012	Mesostigmata	Melicharidae	0	Monica R. Young	BOLD ID Engine Manual	May
GMTPE	GMGRC	GMGRC2748-13	Specimen on BOLD	BIOUG05454-G08	bayw.5	BOLD:ACG4353	BIN on BOLD	BIOUG05454-G08	658	08-Jun-2012	Mesostigmata	Digamasellidae	0	Kate Perez	BIN Taxonomy Match	June
GMTPE	GMGRD	GMGRD1785-13	Specimen on BOLD	BIOUG05950-A06	bayw.7	BOLD:ACG5107	BIN on BOLD	BIOUG05950-A06	602	20-Jun-2012	Mesostigmata	Parasitidae	0	Kate Perez	BIN Taxonomy Match	June
GMTPE	GMGRD	GMGRD1801-13	Specimen on BOLD	BIOUG05950-B10	bayw.7	BOLD:ACG5107	BIN on BOLD	BIOUG05950-B10	611	20-Jun-2012	Mesostigmata	Parasitidae	0	Kate Perez	BIN Taxonomy Match	June
GMTPE	GMGRD	GMGRD1814-13	Specimen on BOLD	BIOUG05950-C11	bayw.7	BOLD:ACG5152	BIN on BOLD	BIOUG05950-C11	631	20-Jun-2012	Mesostigmata	Laelapidae	0	Kate Perez	BOLD ID Engine Manual	June
GMTPE	GMGRD	GMGRD1867-13	Specimen on BOLD	BIOUG05950-H04	bayw.7	BOLD:ACG5152	BIN on BOLD	BIOUG05950-H04	599	20-Jun-2012	Mesostigmata	Laelapidae	0	Kate Perez	BOLD ID Engine Manual	June
GMTPE	GMGRD	GMGRD3583-13	Specimen on BOLD	BIOUG06063-G10	bayw.7	BOLD:ACG5152	BIN on BOLD	BIOUG06063-G10	621	20-Jun-2012	Mesostigmata	Laelapidae	0	Kate Perez	BOLD ID Engine Manual	June
GMTPE	GMGRG	GMGRG3934-13	Specimen on BOLD	BIOUG07417-H01	bayw.13	BOLD:ACJ4882	BIN on BOLD	BIOUG07417-H01	658	12-Aug-2012	Mesostigmata	Phytoseiidae	0	Kate Perez	BIN Taxonomy Match	August
GMTPE	GMGRG	GMGRG3920-13	Specimen on BOLD	BIOUG07417-F11	bayw.13	BOLD:ACJ5458	BIN on BOLD	BIOUG07417-F11	606	12-Aug-2012	Mesostigmata	0	0	Kate Perez	BIN Taxonomy Match	August
GMTPE	GMGRG	GMGRG3928-13	Specimen on BOLD	BIOUG07417-G07	bayw.13	BOLD:ACJ5458	BIN on BOLD	BIOUG07417-G07	606	12-Aug-2012	Mesostigmata	0	0	Kate Perez	BIN Taxonomy Match	August
GMTPE	GMGRI	GMGRI848-13	Specimen on BOLD	BIOUG08370-C11	bayw.17	BOLD:ACJ9095	BIN on BOLD	BIOUG08370-C11	588	22-Sep-2012	Mesostigmata	Parasitidae	0	Kate Perez	BIN Taxonomy Match	September
GMTPZ	GMGMK	GMGMK1525-14	Specimen on BOLD	BIOUG17226-G02	GMP#06026	BOLD:ACM5222	BIN on BOLD	BIOUG17226-G02	588	17-Jun-2014	Mesostigmata	0	0	Kate Perez	BOLD ID Engine Manual	June
GMTPE	GMGRG	GMGRG3919-13	Specimen on BOLD	BIOUG07417-F10	bayw.13	BOLD:ACO0441	BIN on BOLD	BIOUG07417-F10	658	12-Aug-2012	Mesostigmata	Laelapidae	0	Kate Perez	BIN Taxonomy Match	August
GMTPE	GMGRG	GMGRG3937-13	Specimen on BOLD	BIOUG07417-H04	bayw.13	BOLD:ACO0441	BIN on BOLD	BIOUG07417-H04	519	12-Aug-2012	Mesostigmata	Laelapidae	0	Kate Perez	BIN Taxonomy Match	August
GMTPZ	GMGML	GMGML1082-14	Specimen on BOLD	BIOUG17268-H03	GMP#06027	BOLD:ACR3407	BIN on BOLD	BIOUG17268-H03	658	01-Jul-2014	Mesostigmata	Parasitidae	0	Kate Perez	BOLD ID Engine Manual	July
GMTPZ	GMGMJ	GMGMJ1491-14	Specimen on BOLD	BIOUG17099-E11	GMP#06025	BOLD:ACR4258	BIN on BOLD	BIOUG17099-E11	579	02-Jun-2014	Mesostigmata	0	0	Kate Perez	BOLD ID Engine Manual	June
GMTPE	GMGRD	GMGRD3591-13	Specimen on BOLD	BIOUG04008-H10	bayw.7	BOLD:AAZ8610	BIN on BOLD	BIOUG04008-H10	562	20-Jun-2012	Mecoptera	Panorpidae	0	Paul Hebert	BOLD ID Engine (December 2013)	June
GMTPE	GMGRD	GMGRD3593-13	Specimen on BOLD	BIOUG04692-H02	bayw.7	BOLD:AAZ8610	BIN on BOLD	BIOUG04692-H02	579	20-Jun-2012	Mecoptera	Panorpidae	0	Paul Hebert	BOLD ID Engine (December 2013)	June
GMTPE	GMGRD	GMGRD3594-13	Specimen on BOLD	BIOUG04692-H03	bayw.7	BOLD:AAZ8610	BIN on BOLD	BIOUG04692-H03	592	20-Jun-2012	Mecoptera	Panorpidae	0	Paul Hebert	BOLD ID Engine (December 2013)	June
GMTPE	GMGRD	GMGRD3597-13	Specimen on BOLD	BIOUG04692-H06	bayw.7	BOLD:AAZ8610	BIN on BOLD	BIOUG04692-H06	589	20-Jun-2012	Mecoptera	Panorpidae	0	Paul Hebert	BOLD ID Engine (December 2013)	June
GMTPE	GMGRE	GMGRE2266-13	Specimen on BOLD	BIOUG04692-H07	bayw.9	BOLD:AAZ8610	BIN on BOLD	BIOUG04692-H07	582	04-Jul-2012	Mecoptera	Panorpidae	0	Paul Hebert	BOLD ID Engine (December 2013)	July
GMTPE	GMGRE	GMGRE2267-13	Specimen on BOLD	BIOUG04692-H08	bayw.9	BOLD:AAZ8610	BIN on BOLD	BIOUG04692-H08	593	04-Jul-2012	Mecoptera	Panorpidae	0	Paul Hebert	BOLD ID Engine (December 2013)	July
GMTPE	GMGRE	GMGRE2268-13	Specimen on BOLD	BIOUG04692-H09	bayw.9	BOLD:AAZ8610	BIN on BOLD	BIOUG04692-H09	555	04-Jul-2012	Mecoptera	Panorpidae	0	Paul Hebert	BOLD ID Engine (December 2013)	July
GMTPE	GMGRE	GMGRE2269-13	Specimen on BOLD	BIOUG04692-H10	bayw.9	BOLD:AAZ8610	BIN on BOLD	BIOUG04692-H10	590	04-Jul-2012	Mecoptera	Panorpidae	0	Paul Hebert	BOLD ID Engine (December 2013)	July
GMTPE	GMGRF	GMGRF5667-13	Specimen on BOLD	BIOUG07814-C06	bayw.11	BOLD:AAZ8610	BIN on BOLD	BIOUG07814-C06	593	25-Jul-2012	Mecoptera	Panorpidae	0	Paul Hebert	BOLD ID Engine (December 2013)	July
GMTPE	GMGRF	GMGRF5673-13	Specimen on BOLD	BIOUG07814-C12	bayw.11	BOLD:AAZ8610	BIN on BOLD	BIOUG07814-C12	592	25-Jul-2012	Mecoptera	Panorpidae	0	Paul Hebert	BOLD ID Engine (December 2013)	July
GMTPE	GMGRF	GMGRF5674-13	Specimen on BOLD	BIOUG07814-D01	bayw.11	BOLD:AAZ8610	BIN on BOLD	BIOUG07814-D01	592	25-Jul-2012	Mecoptera	Panorpidae	0	Paul Hebert	BOLD ID Engine (December 2013)	July
GMTPE	GMGRG	GMGRG4886-13	Specimen on BOLD	BIOUG08215-C02	bayw.13	BOLD:AAZ8610	BIN on BOLD	BIOUG08215-C02	549	12-Aug-2012	Mecoptera	Panorpidae	0	Paul Hebert	BOLD ID Engine (December 2013)	August
GMTPE	GMGRG	GMGRG4884-13	Specimen on BOLD	BIOUG08215-B12	bayw.13	BOLD:ACF8170	BIN on BOLD	BIOUG08215-B12	576	12-Aug-2012	Mecoptera	Panorpidae	0	Paul Hebert	BOLD ID Engine (December 2013)	August
GMTPZ	GMGMK	GMGMK238-14	Specimen on BOLD	BIOUG17174-F04	GMP#06026	BOLD:AAA1496	BIN on BOLD	BIOUG17174-F04	579	17-Jun-2014	Lepidoptera	Geometridae	Macaria	Kate Perez	BIN Taxonomy Match	June
GMTPZ	GMGML	GMGML1004-14	Specimen on BOLD	BIOUG17268-A09	GMP#06027	BOLD:AAA1513	BIN on BOLD	BIOUG17268-A09	591	01-Jul-2014	Lepidoptera	Plutellidae	Plutella	Kate Perez	BIN Taxonomy Match	July
GMTPZ	GMGML	GMGML1015-14	Specimen on BOLD	BIOUG17268-B08	GMP#06027	BOLD:AAA1513	BIN on BOLD	BIOUG17268-B08	588	01-Jul-2014	Lepidoptera	Plutellidae	Plutella	Kate Perez	BIN Taxonomy Match	July
GMTPZ	GMGMM	GMGMM1271-14	Specimen on BOLD	BIOUG17377-B08	GMP#06028	BOLD:AAA1513	BIN on BOLD	BIOUG17377-B08	588	15-Jul-2014	Lepidoptera	Plutellidae	Plutella	Kate Perez	BIN Taxonomy Match	July
GMTPZ	GMGMM	GMGMM1272-14	Specimen on BOLD	BIOUG17377-B09	GMP#06028	BOLD:AAA1513	BIN on BOLD	BIOUG17377-B09	564	15-Jul-2014	Lepidoptera	Plutellidae	Plutella	Kate Perez	BIN Taxonomy Match	July
GMTPZ	GMGMA	GMGMA527-14	Specimen on BOLD	BIOUG16210-D09	GMP#06015	BOLD:AAA2224	BIN on BOLD	BIOUG16210-D09	558	25-Jul-2013	Lepidoptera	Pieridae	Pieris	Kate Perez	BIN Taxonomy Match	July
GMTPZ	GMGMA	GMGMA528-14	Specimen on BOLD	BIOUG16210-D10	GMP#06015	BOLD:AAA2224	BIN on BOLD	BIOUG16210-D10	611	25-Jul-2013	Lepidoptera	Pieridae	Pieris	Kate Perez	BIN Taxonomy Match	July
GMTPZ	GMGMA	GMGMA579-14	Specimen on BOLD	BIOUG16211-A02	GMP#06015	BOLD:AAA2224	BIN on BOLD	BIOUG16211-A02	619	25-Jul-2013	Lepidoptera	Pieridae	Pieris	Kate Perez	BIN Taxonomy Match	July
GMTPZ	GMGMI	GMGMI205-14	Specimen on BOLD	BIOUG17086-A10	GMP#06024	BOLD:AAA2224	BIN on BOLD	BIOUG17086-A10	552	16-May-2014	Lepidoptera	Pieridae	Pieris	Kate Perez	BIN Taxonomy Match	May
GMTPZ	GMGMK	GMGMK180-14	Specimen on BOLD	BIOUG17174-A06	GMP#06026	BOLD:AAA2224	BIN on BOLD	BIOUG17174-A06	561	17-Jun-2014	Lepidoptera	Pieridae	Pieris	Kate Perez	BIN Taxonomy Match	June
GMTPZ	GMGMK	GMGMK181-14	Specimen on BOLD	BIOUG17174-A07	GMP#06026	BOLD:AAA2224	BIN on BOLD	BIOUG17174-A07	576	17-Jun-2014	Lepidoptera	Pieridae	Pieris	Kate Perez	BIN Taxonomy Match	June
GMTPZ	GMGMK	GMGMK183-14	Specimen on BOLD	BIOUG17174-A09	GMP#06026	BOLD:AAA2224	BIN on BOLD	BIOUG17174-A09	567	17-Jun-2014	Lepidoptera	Pieridae	Pieris	Kate Perez	BIN Taxonomy Match	June
GMTPZ	GMGML	GMGML006-14	Specimen on BOLD	BIOUG17228-A02	GMP#06027	BOLD:AAA2224	BIN on BOLD	BIOUG17228-A02	564	01-Jul-2014	Lepidoptera	Pieridae	Pieris	Kate Perez	BIN Taxonomy Match	July
GMTPZ	GMGML	GMGML007-14	Specimen on BOLD	BIOUG17228-A03	GMP#06027	BOLD:AAA2224	BIN on BOLD	BIOUG17228-A03	522	01-Jul-2014	Lepidoptera	Pieridae	Pieris	Kate Perez	BIN Taxonomy Match	July
GMTPZ	GMGML	GMGML008-14	Specimen on BOLD	BIOUG17228-A04	GMP#06027	BOLD:AAA2224	BIN on BOLD	BIOUG17228-A04	576	01-Jul-2014	Lepidoptera	Pieridae	Pieris	Kate Perez	BIN Taxonomy Match	July
GMTPZ	GMGML	GMGML011-14	Specimen on BOLD	BIOUG17228-A07	GMP#06027	BOLD:AAA2224	BIN on BOLD	BIOUG17228-A07	528	01-Jul-2014	Lepidoptera	Pieridae	Pieris	Kate Perez	BIN Taxonomy Match	July
GMTPZ	GMGML	GMGML012-14	Specimen on BOLD	BIOUG17228-A08	GMP#06027	BOLD:AAA2224	BIN on BOLD	BIOUG17228-A08	564	01-Jul-2014	Lepidoptera	Pieridae	Pieris	Kate Perez	BIN Taxonomy Match	July
GMTPZ	GMGML	GMGML019-14	Specimen on BOLD	BIOUG17228-B03	GMP#06027	BOLD:AAA2224	BIN on BOLD	BIOUG17228-B03	555	01-Jul-2014	Lepidoptera	Pieridae	Pieris	Kate Perez	BIN Taxonomy Match	July
GMTPZ	GMGMM	GMGMM022-14	Specimen on BOLD	BIOUG17296-B08	GMP#06028	BOLD:AAA2224	BIN on BOLD	BIOUG17296-B08	543	15-Jul-2014	Lepidoptera	Pieridae	Pieris	Kate Perez	BIN Taxonomy Match	July
GMTPZ	GMGMM	GMGMM025-14	Specimen on BOLD	BIOUG17296-B11	GMP#06028	BOLD:AAA2224	BIN on BOLD	BIOUG17296-B11	567	15-Jul-2014	Lepidoptera	Pieridae	Pieris	Kate Perez	BIN Taxonomy Match	July
GMTPZ	GMGMM	GMGMM026-14	Specimen on BOLD	BIOUG17296-B12	GMP#06028	BOLD:AAA2224	BIN on BOLD	BIOUG17296-B12	579	15-Jul-2014	Lepidoptera	Pieridae	Pieris	Kate Perez	BIN Taxonomy Match	July
GMTPZ	GMGMM	GMGMM029-14	Specimen on BOLD	BIOUG17296-C03	GMP#06028	BOLD:AAA2224	BIN on BOLD	BIOUG17296-C03	555	15-Jul-2014	Lepidoptera	Pieridae	Pieris	Kate Perez	BIN Taxonomy Match	July
GMTPZ	GMGMM	GMGMM030-14	Specimen on BOLD	BIOUG17296-C04	GMP#06028	BOLD:AAA2224	BIN on BOLD	BIOUG17296-C04	552	15-Jul-2014	Lepidoptera	Pieridae	Pieris	Kate Perez	BIN Taxonomy Match	July
GMTPZ	GMGMM	GMGMM031-14	Specimen on BOLD	BIOUG17296-C05	GMP#06028	BOLD:AAA2224	BIN on BOLD	BIOUG17296-C05	579	15-Jul-2014	Lepidoptera	Pieridae	Pieris	Kate Perez	BIN Taxonomy Match	July
GMTPZ	GMGMM	GMGMM032-14	Specimen on BOLD	BIOUG17296-C06	GMP#06028	BOLD:AAA2224	BIN on BOLD	BIOUG17296-C06	579	15-Jul-2014	Lepidoptera	Pieridae	Pieris	Kate Perez	BIN Taxonomy Match	July
GMTPZ	GMGMM	GMGMM036-14	Specimen on BOLD	BIOUG17296-C10	GMP#06028	BOLD:AAA2224	BIN on BOLD	BIOUG17296-C10	579	15-Jul-2014	Lepidoptera	Pieridae	Pieris	Kate Perez	BIN Taxonomy Match	July
GMTPZ	GMGMM	GMGMM042-14	Specimen on BOLD	BIOUG17296-D04	GMP#06028	BOLD:AAA2224	BIN on BOLD	BIOUG17296-D04	552	15-Jul-2014	Lepidoptera	Pieridae	Pieris	Kate Perez	BIN Taxonomy Match	July
GMTPZ	GMGMM	GMGMM045-14	Specimen on BOLD	BIOUG17296-D07	GMP#06028	BOLD:AAA2224	BIN on BOLD	BIOUG17296-D07	579	15-Jul-2014	Lepidoptera	Pieridae	Pieris	Kate Perez	BIN Taxonomy Match	July
GMTPZ	GMGMM	GMGMM046-14	Specimen on BOLD	BIOUG17296-D08	GMP#06028	BOLD:AAA2224	BIN on BOLD	BIOUG17296-D08	552	15-Jul-2014	Lepidoptera	Pieridae	Pieris	Kate Perez	BIN Taxonomy Match	July
GMTPZ	GMGMM	GMGMM049-14	Specimen on BOLD	BIOUG17296-D11	GMP#06028	BOLD:AAA2224	BIN on BOLD	BIOUG17296-D11	576	15-Jul-2014	Lepidoptera	Pieridae	Pieris	Kate Perez	BIN Taxonomy Match	July
GMTPZ	GMGMN	GMGMN065-14	Specimen on BOLD	BIOUG17381-B02	GMP#06029	BOLD:AAA2224	BIN on BOLD	BIOUG17381-B02	579	29-Jul-2014	Lepidoptera	Pieridae	Pieris	Kate Perez	BIN Taxonomy Match	July
GMTPZ	GMGMN	GMGMN077-14	Specimen on BOLD	BIOUG17381-C02	GMP#06029	BOLD:AAA2224	BIN on BOLD	BIOUG17381-C02	588	29-Jul-2014	Lepidoptera	Pieridae	Pieris	Kate Perez	BIN Taxonomy Match	July
GMTPZ	GMGMN	GMGMN078-14	Specimen on BOLD	BIOUG17381-C03	GMP#06029	BOLD:AAA2224	BIN on BOLD	BIOUG17381-C03	588	29-Jul-2014	Lepidoptera	Pieridae	Pieris	Kate Perez	BIN Taxonomy Match	July
GMTPZ	GMGMN	GMGMN106-14	Specimen on BOLD	BIOUG17381-E07	GMP#06029	BOLD:AAA2224	BIN on BOLD	BIOUG17381-E07	588	29-Jul-2014	Lepidoptera	Pieridae	Pieris	Kate Perez	BIN Taxonomy Match	July
GMTPZ	GMGMN	GMGMN114-14	Specimen on BOLD	BIOUG17381-F03	GMP#06029	BOLD:AAA2224	BIN on BOLD	BIOUG17381-F03	588	29-Jul-2014	Lepidoptera	Pieridae	Pieris	Kate Perez	BIN Taxonomy Match	July
GMTPZ	GMGMN	GMGMN129-14	Specimen on BOLD	BIOUG17381-G06	GMP#06029	BOLD:AAA2224	BIN on BOLD	BIOUG17381-G06	588	29-Jul-2014	Lepidoptera	Pieridae	Pieris	Kate Perez	BIN Taxonomy Match	July
GMTPZ	GMGMA	GMGMA489-14	Specimen on BOLD	BIOUG16210-A07	GMP#06015	BOLD:AAA2226	BIN on BOLD	BIOUG16210-A07	609	25-Jul-2013	Lepidoptera	Pieridae	Pieris	Kate Perez	BOLD ID Engine Manual	July
GMTPZ	GMGMA	GMGMA499-14	Specimen on BOLD	BIOUG16210-B05	GMP#06015	BOLD:AAA2226	BIN on BOLD	BIOUG16210-B05	546	25-Jul-2013	Lepidoptera	Pieridae	Pieris	Kate Perez	BOLD ID Engine Manual	July
GMTPZ	GMGMA	GMGMA511-14	Specimen on BOLD	BIOUG16210-C05	GMP#06015	BOLD:AAA2226	BIN on BOLD	BIOUG16210-C05	556	25-Jul-2013	Lepidoptera	Pieridae	Pieris	Kate Perez	BOLD ID Engine Manual	July
GMTPZ	GMGMA	GMGMA519-14	Specimen on BOLD	BIOUG16210-D01	GMP#06015	BOLD:AAA2226	BIN on BOLD	BIOUG16210-D01	607	25-Jul-2013	Lepidoptera	Pieridae	Pieris	Kate Perez	BOLD ID Engine Manual	July
GMTPZ	GMGMA	GMGMA522-14	Specimen on BOLD	BIOUG16210-D04	GMP#06015	BOLD:AAA2226	BIN on BOLD	BIOUG16210-D04	611	25-Jul-2013	Lepidoptera	Pieridae	Pieris	Kate Perez	BOLD ID Engine Manual	July
GMTPZ	GMGMA	GMGMA531-14	Specimen on BOLD	BIOUG16210-E01	GMP#06015	BOLD:AAA2226	BIN on BOLD	BIOUG16210-E01	608	25-Jul-2013	Lepidoptera	Pieridae	Pieris	Kate Perez	BOLD ID Engine Manual	July
GMTPZ	GMGMA	GMGMA532-14	Specimen on BOLD	BIOUG16210-E02	GMP#06015	BOLD:AAA2226	BIN on BOLD	BIOUG16210-E02	611	25-Jul-2013	Lepidoptera	Pieridae	Pieris	Kate Perez	BOLD ID Engine Manual	July
GMTPZ	GMGMA	GMGMA535-14	Specimen on BOLD	BIOUG16210-E05	GMP#06015	BOLD:AAA2226	BIN on BOLD	BIOUG16210-E05	609	25-Jul-2013	Lepidoptera	Pieridae	Pieris	Kate Perez	BOLD ID Engine Manual	July
GMTPZ	GMGMA	GMGMA581-14	Specimen on BOLD	BIOUG16211-A04	GMP#06015	BOLD:AAA2226	BIN on BOLD	BIOUG16211-A04	611	25-Jul-2013	Lepidoptera	Pieridae	Pieris	Kate Perez	BOLD ID Engine Manual	July
GMTPZ	GMGMB	GMGMB1567-14	Specimen on BOLD	BIOUG16355-A01	GMP#06017	BOLD:AAA2226	BIN on BOLD	BIOUG16355-A01	591	26-Aug-2013	Lepidoptera	Pieridae	Pieris	Kate Perez	BOLD ID Engine Manual	August
GMTPZ	GMGMB	GMGMB416-14	Specimen on BOLD	BIOUG16272-A11	GMP#06017	BOLD:AAA2226	BIN on BOLD	BIOUG16272-A11	582	26-Aug-2013	Lepidoptera	Pieridae	Pieris	Kate Perez	BOLD ID Engine Manual	August
GMTPZ	GMGMB	GMGMB417-14	Specimen on BOLD	BIOUG16272-A12	GMP#06017	BOLD:AAA2226	BIN on BOLD	BIOUG16272-A12	591	26-Aug-2013	Lepidoptera	Pieridae	Pieris	Kate Perez	BOLD ID Engine Manual	August
GMTPZ	GMGMB	GMGMB432-14	Specimen on BOLD	BIOUG16272-C03	GMP#06017	BOLD:AAA2226	BIN on BOLD	BIOUG16272-C03	591	26-Aug-2013	Lepidoptera	Pieridae	Pieris	Kate Perez	BOLD ID Engine Manual	August
GMTPZ	GMGMB	GMGMB437-14	Specimen on BOLD	BIOUG16272-C08	GMP#06017	BOLD:AAA2226	BIN on BOLD	BIOUG16272-C08	591	26-Aug-2013	Lepidoptera	Pieridae	Pieris	Kate Perez	BOLD ID Engine Manual	August
GMTPZ	GMGMB	GMGMB450-14	Specimen on BOLD	BIOUG16272-D09	GMP#06017	BOLD:AAA2226	BIN on BOLD	BIOUG16272-D09	591	26-Aug-2013	Lepidoptera	Pieridae	Pieris	Kate Perez	BOLD ID Engine Manual	August
GMTPZ	GMGMB	GMGMB451-14	Specimen on BOLD	BIOUG16272-D10	GMP#06017	BOLD:AAA2226	BIN on BOLD	BIOUG16272-D10	588	26-Aug-2013	Lepidoptera	Pieridae	Pieris	Kate Perez	BOLD ID Engine Manual	August
GMTPZ	GMGMB	GMGMB462-14	Specimen on BOLD	BIOUG16272-E09	GMP#06017	BOLD:AAA2226	BIN on BOLD	BIOUG16272-E09	591	26-Aug-2013	Lepidoptera	Pieridae	Pieris	Kate Perez	BOLD ID Engine Manual	August
GMTPZ	GMGMB	GMGMB463-14	Specimen on BOLD	BIOUG16272-E10	GMP#06017	BOLD:AAA2226	BIN on BOLD	BIOUG16272-E10	591	26-Aug-2013	Lepidoptera	Pieridae	Pieris	Kate Perez	BOLD ID Engine Manual	August
GMTPZ	GMGMB	GMGMB477-14	Specimen on BOLD	BIOUG16272-F12	GMP#06017	BOLD:AAA2226	BIN on BOLD	BIOUG16272-F12	591	26-Aug-2013	Lepidoptera	Pieridae	Pieris	Kate Perez	BOLD ID Engine Manual	August
GMTPZ	GMGMB	GMGMB482-14	Specimen on BOLD	BIOUG16272-G05	GMP#06017	BOLD:AAA2226	BIN on BOLD	BIOUG16272-G05	582	26-Aug-2013	Lepidoptera	Pieridae	Pieris	Kate Perez	BOLD ID Engine Manual	August
GMTPZ	GMGMB	GMGMB485-14	Specimen on BOLD	BIOUG16272-G08	GMP#06017	BOLD:AAA2226	BIN on BOLD	BIOUG16272-G08	585	26-Aug-2013	Lepidoptera	Pieridae	Pieris	Kate Perez	BOLD ID Engine Manual	August
GMTPZ	GMGMB	GMGMB498-14	Specimen on BOLD	BIOUG16272-H09	GMP#06017	BOLD:AAA2226	BIN on BOLD	BIOUG16272-H09	591	26-Aug-2013	Lepidoptera	Pieridae	Pieris	Kate Perez	BOLD ID Engine Manual	August
GMTPZ	GMGMC	GMGMC022-14	Specimen on BOLD	BIOUG16353-D07	GMP#06016	BOLD:AAA2226	BIN on BOLD	BIOUG16353-D07	591	08-Aug-2013	Lepidoptera	Pieridae	Pieris	Kate Perez	BOLD ID Engine Manual	August
GMTPZ	GMGMC	GMGMC023-14	Specimen on BOLD	BIOUG16353-D08	GMP#06016	BOLD:AAA2226	BIN on BOLD	BIOUG16353-D08	582	08-Aug-2013	Lepidoptera	Pieridae	Pieris	Kate Perez	BOLD ID Engine Manual	August
GMTPZ	GMGMC	GMGMC024-14	Specimen on BOLD	BIOUG16353-D09	GMP#06016	BOLD:AAA2226	BIN on BOLD	BIOUG16353-D09	591	08-Aug-2013	Lepidoptera	Pieridae	Pieris	Kate Perez	BOLD ID Engine Manual	August
GMTPZ	GMGMC	GMGMC237-14	Specimen on BOLD	BIOUG16357-A07	GMP#06016	BOLD:AAA2226	BIN on BOLD	BIOUG16357-A07	519	08-Aug-2013	Lepidoptera	Pieridae	Pieris	Kate Perez	BOLD ID Engine Manual	August
GMTPZ	GMGMD	GMGMD006-14	Specimen on BOLD	BIOUG16357-D07	GMP#06018	BOLD:AAA2226	BIN on BOLD	BIOUG16357-D07	591	16-Sep-2013	Lepidoptera	Pieridae	Pieris	Kate Perez	BOLD ID Engine Manual	September
GMTPZ	GMGMD	GMGMD023-14	Specimen on BOLD	BIOUG16357-E12	GMP#06018	BOLD:AAA2226	BIN on BOLD	BIOUG16357-E12	591	16-Sep-2013	Lepidoptera	Pieridae	Pieris	Kate Perez	BOLD ID Engine Manual	September
GMTPZ	GMGMD	GMGMD025-14	Specimen on BOLD	BIOUG16357-F02	GMP#06018	BOLD:AAA2226	BIN on BOLD	BIOUG16357-F02	588	16-Sep-2013	Lepidoptera	Pieridae	Pieris	Kate Perez	BOLD ID Engine Manual	September
GMTPZ	GMGMD	GMGMD028-14	Specimen on BOLD	BIOUG16357-F05	GMP#06018	BOLD:AAA2226	BIN on BOLD	BIOUG16357-F05	587	16-Sep-2013	Lepidoptera	Pieridae	Pieris	Kate Perez	BOLD ID Engine Manual	September
GMTPZ	GMGMI	GMGMI202-14	Specimen on BOLD	BIOUG17086-A07	GMP#06024	BOLD:AAA2226	BIN on BOLD	BIOUG17086-A07	591	16-May-2014	Lepidoptera	Pieridae	Pieris	Kate Perez	BOLD ID Engine Manual	May
GMTPZ	GMGMI	GMGMI203-14	Specimen on BOLD	BIOUG17086-A08	GMP#06024	BOLD:AAA2226	BIN on BOLD	BIOUG17086-A08	591	16-May-2014	Lepidoptera	Pieridae	Pieris	Kate Perez	BOLD ID Engine Manual	May
GMTPZ	GMGMI	GMGMI204-14	Specimen on BOLD	BIOUG17086-A09	GMP#06024	BOLD:AAA2226	BIN on BOLD	BIOUG17086-A09	537	16-May-2014	Lepidoptera	Pieridae	Pieris	Kate Perez	BOLD ID Engine Manual	May
GMTPZ	GMGMI	GMGMI231-14	Specimen on BOLD	BIOUG17086-C12	GMP#06024	BOLD:AAA2226	BIN on BOLD	BIOUG17086-C12	534	16-May-2014	Lepidoptera	Pieridae	Pieris	Kate Perez	BOLD ID Engine Manual	May
GMTPZ	GMGMJ	GMGMJ022-14	Specimen on BOLD	BIOUG17068-A01	GMP#06025	BOLD:AAA2226	BIN on BOLD	BIOUG17068-A01	576	02-Jun-2014	Lepidoptera	Pieridae	Pieris	Kate Perez	BOLD ID Engine Manual	June
GMTPZ	GMGMJ	GMGMJ023-14	Specimen on BOLD	BIOUG17068-A02	GMP#06025	BOLD:AAA2226	BIN on BOLD	BIOUG17068-A02	540	02-Jun-2014	Lepidoptera	Pieridae	Pieris	Kate Perez	BOLD ID Engine Manual	June
GMTPZ	GMGMJ	GMGMJ024-14	Specimen on BOLD	BIOUG17068-A03	GMP#06025	BOLD:AAA2226	BIN on BOLD	BIOUG17068-A03	549	02-Jun-2014	Lepidoptera	Pieridae	Pieris	Kate Perez	BOLD ID Engine Manual	June
GMTPZ	GMGMJ	GMGMJ025-14	Specimen on BOLD	BIOUG17068-A04	GMP#06025	BOLD:AAA2226	BIN on BOLD	BIOUG17068-A04	561	02-Jun-2014	Lepidoptera	Pieridae	Pieris	Kate Perez	BOLD ID Engine Manual	June
GMTPZ	GMGMJ	GMGMJ026-14	Specimen on BOLD	BIOUG17068-A05	GMP#06025	BOLD:AAA2226	BIN on BOLD	BIOUG17068-A05	525	02-Jun-2014	Lepidoptera	Pieridae	Pieris	Kate Perez	BOLD ID Engine Manual	June
GMTPZ	GMGMJ	GMGMJ027-14	Specimen on BOLD	BIOUG17068-A06	GMP#06025	BOLD:AAA2226	BIN on BOLD	BIOUG17068-A06	534	02-Jun-2014	Lepidoptera	Pieridae	Pieris	Kate Perez	BOLD ID Engine Manual	June
GMTPZ	GMGMJ	GMGMJ028-14	Specimen on BOLD	BIOUG17068-A07	GMP#06025	BOLD:AAA2226	BIN on BOLD	BIOUG17068-A07	564	02-Jun-2014	Lepidoptera	Pieridae	Pieris	Kate Perez	BOLD ID Engine Manual	June
GMTPZ	GMGMJ	GMGMJ030-14	Specimen on BOLD	BIOUG17068-A09	GMP#06025	BOLD:AAA2226	BIN on BOLD	BIOUG17068-A09	540	02-Jun-2014	Lepidoptera	Pieridae	Pieris	Kate Perez	BOLD ID Engine Manual	June
GMTPZ	GMGMK	GMGMK182-14	Specimen on BOLD	BIOUG17174-A08	GMP#06026	BOLD:AAA2226	BIN on BOLD	BIOUG17174-A08	588	17-Jun-2014	Lepidoptera	Pieridae	Pieris	Kate Perez	BOLD ID Engine Manual	June
GMTPZ	GMGMK	GMGMK184-14	Specimen on BOLD	BIOUG17174-A10	GMP#06026	BOLD:AAA2226	BIN on BOLD	BIOUG17174-A10	591	17-Jun-2014	Lepidoptera	Pieridae	Pieris	Kate Perez	BOLD ID Engine Manual	June
GMTPZ	GMGML	GMGML005-14	Specimen on BOLD	BIOUG17228-A01	GMP#06027	BOLD:AAA2226	BIN on BOLD	BIOUG17228-A01	588	01-Jul-2014	Lepidoptera	Pieridae	Pieris	Kate Perez	BOLD ID Engine Manual	July
GMTPZ	GMGML	GMGML009-14	Specimen on BOLD	BIOUG17228-A05	GMP#06027	BOLD:AAA2226	BIN on BOLD	BIOUG17228-A05	519	01-Jul-2014	Lepidoptera	Pieridae	Pieris	Kate Perez	BOLD ID Engine Manual	July
GMTPZ	GMGML	GMGML010-14	Specimen on BOLD	BIOUG17228-A06	GMP#06027	BOLD:AAA2226	BIN on BOLD	BIOUG17228-A06	564	01-Jul-2014	Lepidoptera	Pieridae	Pieris	Kate Perez	BOLD ID Engine Manual	July
GMTPZ	GMGML	GMGML013-14	Specimen on BOLD	BIOUG17228-A09	GMP#06027	BOLD:AAA2226	BIN on BOLD	BIOUG17228-A09	540	01-Jul-2014	Lepidoptera	Pieridae	Pieris	Kate Perez	BOLD ID Engine Manual	July
GMTPZ	GMGML	GMGML018-14	Specimen on BOLD	BIOUG17228-B02	GMP#06027	BOLD:AAA2226	BIN on BOLD	BIOUG17228-B02	540	01-Jul-2014	Lepidoptera	Pieridae	Pieris	Kate Perez	BOLD ID Engine Manual	July
GMTPZ	GMGMM	GMGMM024-14	Specimen on BOLD	BIOUG17296-B10	GMP#06028	BOLD:AAA2226	BIN on BOLD	BIOUG17296-B10	582	15-Jul-2014	Lepidoptera	Pieridae	Pieris	Kate Perez	BOLD ID Engine Manual	July
GMTPZ	GMGMM	GMGMM027-14	Specimen on BOLD	BIOUG17296-C01	GMP#06028	BOLD:AAA2226	BIN on BOLD	BIOUG17296-C01	522	15-Jul-2014	Lepidoptera	Pieridae	Pieris	Kate Perez	BOLD ID Engine Manual	July
GMTPZ	GMGMM	GMGMM028-14	Specimen on BOLD	BIOUG17296-C02	GMP#06028	BOLD:AAA2226	BIN on BOLD	BIOUG17296-C02	567	15-Jul-2014	Lepidoptera	Pieridae	Pieris	Kate Perez	BOLD ID Engine Manual	July
GMTPZ	GMGMM	GMGMM034-14	Specimen on BOLD	BIOUG17296-C08	GMP#06028	BOLD:AAA2226	BIN on BOLD	BIOUG17296-C08	582	15-Jul-2014	Lepidoptera	Pieridae	Pieris	Kate Perez	BOLD ID Engine Manual	July
GMTPZ	GMGMM	GMGMM035-14	Specimen on BOLD	BIOUG17296-C09	GMP#06028	BOLD:AAA2226	BIN on BOLD	BIOUG17296-C09	567	15-Jul-2014	Lepidoptera	Pieridae	Pieris	Kate Perez	BOLD ID Engine Manual	July
GMTPZ	GMGMM	GMGMM037-14	Specimen on BOLD	BIOUG17296-C11	GMP#06028	BOLD:AAA2226	BIN on BOLD	BIOUG17296-C11	582	15-Jul-2014	Lepidoptera	Pieridae	Pieris	Kate Perez	BOLD ID Engine Manual	July
GMTPZ	GMGMM	GMGMM038-14	Specimen on BOLD	BIOUG17296-C12	GMP#06028	BOLD:AAA2226	BIN on BOLD	BIOUG17296-C12	582	15-Jul-2014	Lepidoptera	Pieridae	Pieris	Kate Perez	BOLD ID Engine Manual	July
GMTPZ	GMGMM	GMGMM040-14	Specimen on BOLD	BIOUG17296-D02	GMP#06028	BOLD:AAA2226	BIN on BOLD	BIOUG17296-D02	537	15-Jul-2014	Lepidoptera	Pieridae	Pieris	Kate Perez	BOLD ID Engine Manual	July
GMTPZ	GMGMM	GMGMM041-14	Specimen on BOLD	BIOUG17296-D03	GMP#06028	BOLD:AAA2226	BIN on BOLD	BIOUG17296-D03	564	15-Jul-2014	Lepidoptera	Pieridae	Pieris	Kate Perez	BOLD ID Engine Manual	July
GMTPZ	GMGMM	GMGMM043-14	Specimen on BOLD	BIOUG17296-D05	GMP#06028	BOLD:AAA2226	BIN on BOLD	BIOUG17296-D05	567	15-Jul-2014	Lepidoptera	Pieridae	Pieris	Kate Perez	BOLD ID Engine Manual	July
GMTPZ	GMGMM	GMGMM044-14	Specimen on BOLD	BIOUG17296-D06	GMP#06028	BOLD:AAA2226	BIN on BOLD	BIOUG17296-D06	579	15-Jul-2014	Lepidoptera	Pieridae	Pieris	Kate Perez	BOLD ID Engine Manual	July
GMTPZ	GMGMM	GMGMM047-14	Specimen on BOLD	BIOUG17296-D09	GMP#06028	BOLD:AAA2226	BIN on BOLD	BIOUG17296-D09	567	15-Jul-2014	Lepidoptera	Pieridae	Pieris	Kate Perez	BOLD ID Engine Manual	July
GMTPZ	GMGMM	GMGMM048-14	Specimen on BOLD	BIOUG17296-D10	GMP#06028	BOLD:AAA2226	BIN on BOLD	BIOUG17296-D10	582	15-Jul-2014	Lepidoptera	Pieridae	Pieris	Kate Perez	BOLD ID Engine Manual	July
GMTPZ	GMGMN	GMGMN058-14	Specimen on BOLD	BIOUG17381-A07	GMP#06029	BOLD:AAA2226	BIN on BOLD	BIOUG17381-A07	591	29-Jul-2014	Lepidoptera	Pieridae	Pieris	Kate Perez	BOLD ID Engine Manual	July
GMTPZ	GMGMN	GMGMN061-14	Specimen on BOLD	BIOUG17381-A10	GMP#06029	BOLD:AAA2226	BIN on BOLD	BIOUG17381-A10	567	29-Jul-2014	Lepidoptera	Pieridae	Pieris	Kate Perez	BOLD ID Engine Manual	July
GMTPZ	GMGMN	GMGMN062-14	Specimen on BOLD	BIOUG17381-A11	GMP#06029	BOLD:AAA2226	BIN on BOLD	BIOUG17381-A11	588	29-Jul-2014	Lepidoptera	Pieridae	Pieris	Kate Perez	BOLD ID Engine Manual	July
GMTPZ	GMGMN	GMGMN063-14	Specimen on BOLD	BIOUG17381-A12	GMP#06029	BOLD:AAA2226	BIN on BOLD	BIOUG17381-A12	576	29-Jul-2014	Lepidoptera	Pieridae	Pieris	Kate Perez	BOLD ID Engine Manual	July
GMTPZ	GMGMN	GMGMN067-14	Specimen on BOLD	BIOUG17381-B04	GMP#06029	BOLD:AAA2226	BIN on BOLD	BIOUG17381-B04	561	29-Jul-2014	Lepidoptera	Pieridae	Pieris	Kate Perez	BOLD ID Engine Manual	July
GMTPZ	GMGMN	GMGMN075-14	Specimen on BOLD	BIOUG17381-B12	GMP#06029	BOLD:AAA2226	BIN on BOLD	BIOUG17381-B12	588	29-Jul-2014	Lepidoptera	Pieridae	Pieris	Kate Perez	BOLD ID Engine Manual	July
GMTPZ	GMGMN	GMGMN079-14	Specimen on BOLD	BIOUG17381-C04	GMP#06029	BOLD:AAA2226	BIN on BOLD	BIOUG17381-C04	576	29-Jul-2014	Lepidoptera	Pieridae	Pieris	Kate Perez	BOLD ID Engine Manual	July
GMTPZ	GMGMN	GMGMN080-14	Specimen on BOLD	BIOUG17381-C05	GMP#06029	BOLD:AAA2226	BIN on BOLD	BIOUG17381-C05	591	29-Jul-2014	Lepidoptera	Pieridae	Pieris	Kate Perez	BOLD ID Engine Manual	July
GMTPZ	GMGMN	GMGMN082-14	Specimen on BOLD	BIOUG17381-C07	GMP#06029	BOLD:AAA2226	BIN on BOLD	BIOUG17381-C07	591	29-Jul-2014	Lepidoptera	Pieridae	Pieris	Kate Perez	BOLD ID Engine Manual	July
GMTPZ	GMGMN	GMGMN083-14	Specimen on BOLD	BIOUG17381-C08	GMP#06029	BOLD:AAA2226	BIN on BOLD	BIOUG17381-C08	591	29-Jul-2014	Lepidoptera	Pieridae	Pieris	Kate Perez	BOLD ID Engine Manual	July
GMTPZ	GMGMN	GMGMN084-14	Specimen on BOLD	BIOUG17381-C09	GMP#06029	BOLD:AAA2226	BIN on BOLD	BIOUG17381-C09	555	29-Jul-2014	Lepidoptera	Pieridae	Pieris	Kate Perez	BOLD ID Engine Manual	July
GMTPZ	GMGMN	GMGMN089-14	Specimen on BOLD	BIOUG17381-D02	GMP#06029	BOLD:AAA2226	BIN on BOLD	BIOUG17381-D02	590	29-Jul-2014	Lepidoptera	Pieridae	Pieris	Kate Perez	BOLD ID Engine Manual	July
GMTPZ	GMGMN	GMGMN092-14	Specimen on BOLD	BIOUG17381-D05	GMP#06029	BOLD:AAA2226	BIN on BOLD	BIOUG17381-D05	588	29-Jul-2014	Lepidoptera	Pieridae	Pieris	Kate Perez	BOLD ID Engine Manual	July
GMTPZ	GMGMN	GMGMN095-14	Specimen on BOLD	BIOUG17381-D08	GMP#06029	BOLD:AAA2226	BIN on BOLD	BIOUG17381-D08	591	29-Jul-2014	Lepidoptera	Pieridae	Pieris	Kate Perez	BOLD ID Engine Manual	July
GMTPZ	GMGMN	GMGMN116-14	Specimen on BOLD	BIOUG17381-F05	GMP#06029	BOLD:AAA2226	BIN on BOLD	BIOUG17381-F05	564	29-Jul-2014	Lepidoptera	Pieridae	Pieris	Kate Perez	BOLD ID Engine Manual	July
GMTPZ	GMGMN	GMGMN119-14	Specimen on BOLD	BIOUG17381-F08	GMP#06029	BOLD:AAA2226	BIN on BOLD	BIOUG17381-F08	591	29-Jul-2014	Lepidoptera	Pieridae	Pieris	Kate Perez	BOLD ID Engine Manual	July
GMTPZ	GMGMN	GMGMN130-14	Specimen on BOLD	BIOUG17381-G07	GMP#06029	BOLD:AAA2226	BIN on BOLD	BIOUG17381-G07	564	29-Jul-2014	Lepidoptera	Pieridae	Pieris	Kate Perez	BOLD ID Engine Manual	July
GMTPZ	GMGMN	GMGMN146-14	Specimen on BOLD	BIOUG17381-H11	GMP#06029	BOLD:AAA2226	BIN on BOLD	BIOUG17381-H11	585	29-Jul-2014	Lepidoptera	Pieridae	Pieris	Kate Perez	BOLD ID Engine Manual	July
GMTPZ	GMGMD	GMGMD022-14	Specimen on BOLD	BIOUG16357-E11	GMP#06018	BOLD:AAA2632	BIN on BOLD	BIOUG16357-E11	591	16-Sep-2013	Lepidoptera	Noctuidae	Noctua	Kate Perez	BIN Taxonomy Match	September
GMTPZ	GMGMD	GMGMD029-14	Specimen on BOLD	BIOUG16357-F06	GMP#06018	BOLD:AAA2632	BIN on BOLD	BIOUG16357-F06	588	16-Sep-2013	Lepidoptera	Noctuidae	Noctua	Kate Perez	BIN Taxonomy Match	September
GMTPZ	GMGMK	GMGMK175-14	Specimen on BOLD	BIOUG17174-A01	GMP#06026	BOLD:AAA2632	BIN on BOLD	BIOUG17174-A01	527	17-Jun-2014	Lepidoptera	Noctuidae	Noctua	Kate Perez	BIN Taxonomy Match	June
GMTPZ	GMGMM	GMGMM051-14	Specimen on BOLD	BIOUG17296-E01	GMP#06028	BOLD:AAA2632	BIN on BOLD	BIOUG17296-E01	579	15-Jul-2014	Lepidoptera	Noctuidae	Noctua	Kate Perez	BIN Taxonomy Match	July
GMTPZ	GMGMJ	GMGMJ042-14	Specimen on BOLD	BIOUG17068-B09	GMP#06025	BOLD:AAA3303	BIN on BOLD	BIOUG17068-B09	588	02-Jun-2014	Lepidoptera	Lycaenidae	Polyommatus	Kate Perez	BOLD ID Engine Manual	June
GMTPZ	GMGMK	GMGMK232-14	Specimen on BOLD	BIOUG17174-E10	GMP#06026	BOLD:AAA3303	BIN on BOLD	BIOUG17174-E10	582	17-Jun-2014	Lepidoptera	Lycaenidae	Polyommatus	Kate Perez	BOLD ID Engine Manual	June
GMTPZ	GMGMI	GMGMI197-14	Specimen on BOLD	BIOUG17086-A02	GMP#06024	BOLD:AAA4201	BIN on BOLD	BIOUG17086-A02	573	16-May-2014	Lepidoptera	Noctuidae	Apamea	Kate Perez	BIN Taxonomy Match	May
GMTPZ	GMGMI	GMGMI196-14	Specimen on BOLD	BIOUG17086-A01	GMP#06024	BOLD:AAA5810	BIN on BOLD	BIOUG17086-A01	564	16-May-2014	Lepidoptera	Papilionidae	Papilio	Kate Perez	BIN Taxonomy Match	May
GMTPZ	GMGMA	GMGMA484-14	Specimen on BOLD	BIOUG16210-A02	GMP#06015	BOLD:AAA6178	BIN on BOLD	BIOUG16210-A02	612	25-Jul-2013	Lepidoptera	Erebidae	Phragmatobia	Kate Perez	BIN Taxonomy Match	July
GMTPZ	GMGMN	GMGMN086-14	Specimen on BOLD	BIOUG17381-C11	GMP#06029	BOLD:AAA6178	BIN on BOLD	BIOUG17381-C11	579	29-Jul-2014	Lepidoptera	Erebidae	Phragmatobia	Kate Perez	BIN Taxonomy Match	July
GMTPZ	GMGMI	GMGMI212-14	Specimen on BOLD	BIOUG17086-B05	GMP#06024	BOLD:AAA6267	BIN on BOLD	BIOUG17086-B05	591	16-May-2014	Lepidoptera	Hesperiidae	Carterocephalus	Kate Perez	BIN Taxonomy Match	May
GMTPZ	GMGMI	GMGMI224-14	Specimen on BOLD	BIOUG17086-C05	GMP#06024	BOLD:AAA6267	BIN on BOLD	BIOUG17086-C05	549	16-May-2014	Lepidoptera	Hesperiidae	Carterocephalus	Kate Perez	BIN Taxonomy Match	May
GMTPZ	GMGMI	GMGMI227-14	Specimen on BOLD	BIOUG17086-C08	GMP#06024	BOLD:AAA6267	BIN on BOLD	BIOUG17086-C08	528	16-May-2014	Lepidoptera	Hesperiidae	Carterocephalus	Kate Perez	BIN Taxonomy Match	May
GMTPZ	GMGMJ	GMGMJ1348-14	Specimen on BOLD	BIOUG17098-A11	GMP#06025	BOLD:AAA6293	BIN on BOLD	BIOUG17098-A11	576	02-Jun-2014	Lepidoptera	Tortricidae	Cnephasia	Kate Perez	BIN Taxonomy Match	June
GMTPZ	GMGML	GMGML1007-14	Specimen on BOLD	BIOUG17268-A12	GMP#06027	BOLD:AAA6432	BIN on BOLD	BIOUG17268-A12	582	01-Jul-2014	Lepidoptera	Erebidae	Orgyia	Kate Perez	BIN Taxonomy Match	July
GMTPZ	GMGML	GMGML043-14	Specimen on BOLD	BIOUG17228-D03	GMP#06027	BOLD:AAA6759	BIN on BOLD	BIOUG17228-D03	576	01-Jul-2014	Lepidoptera	Hesperiidae	Thymelicus	Kate Perez	BIN Taxonomy Match	July
GMTPZ	GMGML	GMGML046-14	Specimen on BOLD	BIOUG17228-D06	GMP#06027	BOLD:AAA6759	BIN on BOLD	BIOUG17228-D06	587	01-Jul-2014	Lepidoptera	Hesperiidae	Thymelicus	Kate Perez	BIN Taxonomy Match	July
GMTPZ	GMGMN	GMGMN127-14	Specimen on BOLD	BIOUG17381-G04	GMP#06029	BOLD:AAA6759	BIN on BOLD	BIOUG17381-G04	564	29-Jul-2014	Lepidoptera	Hesperiidae	Thymelicus	Kate Perez	BIN Taxonomy Match	July
GMTPZ	GMGMK	GMGMK185-14	Specimen on BOLD	BIOUG17174-A11	GMP#06026	BOLD:AAA6940	BIN on BOLD	BIOUG17174-A11	579	17-Jun-2014	Lepidoptera	Nymphalidae	Melanargia	Kate Perez	BIN Taxonomy Match	June
GMTPZ	GMGMK	GMGMK186-14	Specimen on BOLD	BIOUG17174-A12	GMP#06026	BOLD:AAA6940	BIN on BOLD	BIOUG17174-A12	545	17-Jun-2014	Lepidoptera	Nymphalidae	Melanargia	Kate Perez	BIN Taxonomy Match	June
GMTPZ	GMGMK	GMGMK187-14	Specimen on BOLD	BIOUG17174-B01	GMP#06026	BOLD:AAA6940	BIN on BOLD	BIOUG17174-B01	567	17-Jun-2014	Lepidoptera	Nymphalidae	Melanargia	Kate Perez	BIN Taxonomy Match	June
GMTPZ	GMGMM	GMGMM082-14	Specimen on BOLD	BIOUG17296-G08	GMP#06028	BOLD:AAA7574	BIN on BOLD	BIOUG17296-G08	579	15-Jul-2014	Lepidoptera	Noctuidae	Noctua	Kate Perez	BIN Taxonomy Match	July
GMTPZ	GMGMA	GMGMA487-14	Specimen on BOLD	BIOUG16210-A05	GMP#06015	BOLD:AAA7663	BIN on BOLD	BIOUG16210-A05	607	25-Jul-2013	Lepidoptera	Lycaenidae	Celastrina	Kate Perez	BIN Taxonomy Match	July
GMTPZ	GMGMA	GMGMA491-14	Specimen on BOLD	BIOUG16210-A09	GMP#06015	BOLD:AAA7663	BIN on BOLD	BIOUG16210-A09	602	25-Jul-2013	Lepidoptera	Lycaenidae	Celastrina	Kate Perez	BIN Taxonomy Match	July
GMTPZ	GMGMA	GMGMA518-14	Specimen on BOLD	BIOUG16210-C12	GMP#06015	BOLD:AAA7663	BIN on BOLD	BIOUG16210-C12	609	25-Jul-2013	Lepidoptera	Lycaenidae	Celastrina	Kate Perez	BIN Taxonomy Match	July
GMTPZ	GMGMB	GMGMB017-14	Specimen on BOLD	BIOUG16267-C08	GMP#06017	BOLD:AAA7663	BIN on BOLD	BIOUG16267-C08	594	26-Aug-2013	Lepidoptera	Lycaenidae	Celastrina	Kate Perez	BIN Taxonomy Match	August
GMTPZ	GMGMB	GMGMB018-14	Specimen on BOLD	BIOUG16267-C09	GMP#06017	BOLD:AAA7663	BIN on BOLD	BIOUG16267-C09	585	26-Aug-2013	Lepidoptera	Lycaenidae	Celastrina	Kate Perez	BIN Taxonomy Match	August
GMTPZ	GMGMB	GMGMB019-14	Specimen on BOLD	BIOUG16267-C10	GMP#06017	BOLD:AAA7663	BIN on BOLD	BIOUG16267-C10	594	26-Aug-2013	Lepidoptera	Lycaenidae	Celastrina	Kate Perez	BIN Taxonomy Match	August
GMTPZ	GMGMB	GMGMB470-14	Specimen on BOLD	BIOUG16272-F05	GMP#06017	BOLD:AAA7663	BIN on BOLD	BIOUG16272-F05	582	26-Aug-2013	Lepidoptera	Lycaenidae	Celastrina	Kate Perez	BIN Taxonomy Match	August
GMTPZ	GMGMC	GMGMC014-14	Specimen on BOLD	BIOUG16353-C11	GMP#06016	BOLD:AAA7663	BIN on BOLD	BIOUG16353-C11	582	08-Aug-2013	Lepidoptera	Lycaenidae	Celastrina	Kate Perez	BIN Taxonomy Match	August
GMTPZ	GMGMC	GMGMC250-14	Specimen on BOLD	BIOUG16357-B08	GMP#06016	BOLD:AAA7663	BIN on BOLD	BIOUG16357-B08	591	08-Aug-2013	Lepidoptera	Lycaenidae	Celastrina	Kate Perez	BIN Taxonomy Match	August
GMTPZ	GMGMB	GMGMB1356-14	Specimen on BOLD	BIOUG16352-A01	GMP#06017	BOLD:AAA7740	BIN on BOLD	BIOUG16352-A01	585	26-Aug-2013	Lepidoptera	Yponomeutidae	Yponomeuta	Kate Perez	BIN Taxonomy Match	August
GMTPZ	GMGMC	GMGMC847-14	Specimen on BOLD	BIOUG16522-A07	GMP#06016	BOLD:AAA7740	BIN on BOLD	BIOUG16522-A07	551	08-Aug-2013	Lepidoptera	Yponomeutidae	Yponomeuta	Kate Perez	BIN Taxonomy Match	August
GMTPZ	GMGMD	GMGMD353-14	Specimen on BOLD	BIOUG16609-A07	GMP#06018	BOLD:AAA7740	BIN on BOLD	BIOUG16609-A07	579	16-Sep-2013	Lepidoptera	Yponomeutidae	Yponomeuta	Kate Perez	BIN Taxonomy Match	September
GMTPZ	GMGML	GMGML1194-14	Specimen on BOLD	BIOUG17266-A09	GMP#06027	BOLD:AAA7740	BIN on BOLD	BIOUG17266-A09	620	01-Jul-2014	Lepidoptera	Yponomeutidae	Yponomeuta	Kate Perez	BIN Taxonomy Match	July
GMTPZ	GMGMM	GMGMM975-14	Specimen on BOLD	BIOUG17374-A09	GMP#06028	BOLD:AAA7740	BIN on BOLD	BIOUG17374-A09	588	15-Jul-2014	Lepidoptera	Yponomeutidae	Yponomeuta	Kate Perez	BIN Taxonomy Match	July
GMTPZ	GMGMM	GMGMM981-14	Specimen on BOLD	BIOUG17374-B03	GMP#06028	BOLD:AAA7740	BIN on BOLD	BIOUG17374-B03	588	15-Jul-2014	Lepidoptera	Yponomeutidae	Yponomeuta	Kate Perez	BIN Taxonomy Match	July
GMTPZ	GMGMN	GMGMN841-14	Specimen on BOLD	BIOUG17441-H10	GMP#06029	BOLD:AAA7740	BIN on BOLD	BIOUG17441-H10	588	29-Jul-2014	Lepidoptera	Yponomeutidae	Yponomeuta	Kate Perez	BIN Taxonomy Match	July
GMTPZ	GMGMA	GMGMA500-14	Specimen on BOLD	BIOUG16210-B06	GMP#06015	BOLD:AAA7786	BIN on BOLD	BIOUG16210-B06	559	25-Jul-2013	Lepidoptera	Nymphalidae	Maniola	Kate Perez	BIN Taxonomy Match	July
GMTPZ	GMGMM	GMGMM011-14	Specimen on BOLD	BIOUG17296-A09	GMP#06028	BOLD:AAA7786	BIN on BOLD	BIOUG17296-A09	567	15-Jul-2014	Lepidoptera	Nymphalidae	Maniola	Kate Perez	BIN Taxonomy Match	July
GMTPZ	GMGMM	GMGMM013-14	Specimen on BOLD	BIOUG17296-A11	GMP#06028	BOLD:AAA7786	BIN on BOLD	BIOUG17296-A11	582	15-Jul-2014	Lepidoptera	Nymphalidae	Maniola	Kate Perez	BIN Taxonomy Match	July
GMTPZ	GMGMN	GMGMN076-14	Specimen on BOLD	BIOUG17381-C01	GMP#06029	BOLD:AAA7786	BIN on BOLD	BIOUG17381-C01	573	29-Jul-2014	Lepidoptera	Nymphalidae	Maniola	Kate Perez	BIN Taxonomy Match	July
GMTPZ	GMGMB	GMGMB015-14	Specimen on BOLD	BIOUG16267-C06	GMP#06017	BOLD:AAA8017	BIN on BOLD	BIOUG16267-C06	579	26-Aug-2013	Lepidoptera	Geometridae	Camptogramma	Kate Perez	BIN Taxonomy Match	August
GMTPZ	GMGMB	GMGMB1380-14	Specimen on BOLD	BIOUG16352-C01	GMP#06017	BOLD:AAA8017	BIN on BOLD	BIOUG16352-C01	591	26-Aug-2013	Lepidoptera	Geometridae	Camptogramma	Kate Perez	BIN Taxonomy Match	August
GMTPZ	GMGMC	GMGMC016-14	Specimen on BOLD	BIOUG16353-D01	GMP#06016	BOLD:AAA8017	BIN on BOLD	BIOUG16353-D01	555	08-Aug-2013	Lepidoptera	Geometridae	Camptogramma	Kate Perez	BIN Taxonomy Match	August
GMTPZ	GMGMJ	GMGMJ046-14	Specimen on BOLD	BIOUG17068-C01	GMP#06025	BOLD:AAA8017	BIN on BOLD	BIOUG17068-C01	522	02-Jun-2014	Lepidoptera	Geometridae	Camptogramma	Kate Perez	BIN Taxonomy Match	June
GMTPZ	GMGMN	GMGMN268-14	Specimen on BOLD	BIOUG17383-C03	GMP#06029	BOLD:AAA8256	BIN on BOLD	BIOUG17383-C03	588	29-Jul-2014	Lepidoptera	Geometridae	Idaea	Kate Perez	BIN Taxonomy Match	July
GMTPZ	GMGMD	GMGMD019-14	Specimen on BOLD	BIOUG16357-E08	GMP#06018	BOLD:AAA8276	BIN on BOLD	BIOUG16357-E08	591	16-Sep-2013	Lepidoptera	Geometridae	Aplocera	Kate Perez	BIN Taxonomy Match	September
GMTPZ	GMGMD	GMGMD043-14	Specimen on BOLD	BIOUG16357-G08	GMP#06018	BOLD:AAA8276	BIN on BOLD	BIOUG16357-G08	591	16-Sep-2013	Lepidoptera	Geometridae	Aplocera	Kate Perez	BIN Taxonomy Match	September
GMTPZ	GMGMD	GMGMD046-14	Specimen on BOLD	BIOUG16357-G11	GMP#06018	BOLD:AAA8276	BIN on BOLD	BIOUG16357-G11	579	16-Sep-2013	Lepidoptera	Geometridae	Aplocera	Kate Perez	BIN Taxonomy Match	September
GMTPZ	GMGMJ	GMGMJ050-14	Specimen on BOLD	BIOUG17068-C05	GMP#06025	BOLD:AAA8276	BIN on BOLD	BIOUG17068-C05	576	02-Jun-2014	Lepidoptera	Geometridae	Aplocera	Kate Perez	BIN Taxonomy Match	June
GMTPZ	GMGMI	GMGMI886-14	Specimen on BOLD	BIOUG17116-C02	GMP#06024	BOLD:AAA8637	BIN on BOLD	BIOUG17116-C02	570	16-May-2014	Lepidoptera	Tortricidae	Dichrorampha	Kate Perez	BOLD ID Engine Manual	May
GMTPZ	GMGMI	GMGMI916-14	Specimen on BOLD	BIOUG17116-E08	GMP#06024	BOLD:AAA8637	BIN on BOLD	BIOUG17116-E08	564	16-May-2014	Lepidoptera	Tortricidae	Dichrorampha	Kate Perez	BOLD ID Engine Manual	May
GMTPZ	GMGMI	GMGMI927-14	Specimen on BOLD	BIOUG17116-F07	GMP#06024	BOLD:AAA8637	BIN on BOLD	BIOUG17116-F07	573	16-May-2014	Lepidoptera	Tortricidae	Dichrorampha	Kate Perez	BOLD ID Engine Manual	May
GMTPZ	GMGMJ	GMGMJ1355-14	Specimen on BOLD	BIOUG17098-B06	GMP#06025	BOLD:AAA8637	BIN on BOLD	BIOUG17098-B06	573	02-Jun-2014	Lepidoptera	Tortricidae	Dichrorampha	Kate Perez	BOLD ID Engine Manual	June
GMTPZ	GMGMJ	GMGMJ484-14	Specimen on BOLD	BIOUG17026-H08	GMP#06025	BOLD:AAA8637	BIN on BOLD	BIOUG17026-H08	573	02-Jun-2014	Lepidoptera	Tortricidae	Dichrorampha	Kate Perez	BOLD ID Engine Manual	June
GMTPZ	GMGMM	GMGMM1309-14	Specimen on BOLD	BIOUG17377-E10	GMP#06028	BOLD:AAA8637	BIN on BOLD	BIOUG17377-E10	630	15-Jul-2014	Lepidoptera	Tortricidae	Dichrorampha	Kate Perez	BOLD ID Engine Manual	July
GMTPZ	GMGMA	GMGMA485-14	Specimen on BOLD	BIOUG16210-A03	GMP#06015	BOLD:AAA8958	BIN on BOLD	BIOUG16210-A03	612	25-Jul-2013	Lepidoptera	Nymphalidae	Argynnis	Kate Perez	BIN Taxonomy Match	July
GMTPZ	GMGMB	GMGMB406-14	Specimen on BOLD	BIOUG16272-A01	GMP#06017	BOLD:AAA8958	BIN on BOLD	BIOUG16272-A01	588	26-Aug-2013	Lepidoptera	Nymphalidae	Argynnis	Kate Perez	BIN Taxonomy Match	August
GMTPZ	GMGMC	GMGMC032-14	Specimen on BOLD	BIOUG16353-E05	GMP#06016	BOLD:AAA8958	BIN on BOLD	BIOUG16353-E05	588	08-Aug-2013	Lepidoptera	Nymphalidae	Argynnis	Kate Perez	BIN Taxonomy Match	August
GMTPZ	GMGML	GMGML030-14	Specimen on BOLD	BIOUG17228-C02	GMP#06027	BOLD:AAA8958	BIN on BOLD	BIOUG17228-C02	579	01-Jul-2014	Lepidoptera	Nymphalidae	Argynnis	Kate Perez	BIN Taxonomy Match	July
GMTPZ	GMGMM	GMGMM003-14	Specimen on BOLD	BIOUG17296-A01	GMP#06028	BOLD:AAA8958	BIN on BOLD	BIOUG17296-A01	579	15-Jul-2014	Lepidoptera	Nymphalidae	Argynnis	Kate Perez	BIN Taxonomy Match	July
GMTPZ	GMGMM	GMGMM004-14	Specimen on BOLD	BIOUG17296-A02	GMP#06028	BOLD:AAA8958	BIN on BOLD	BIOUG17296-A02	579	15-Jul-2014	Lepidoptera	Nymphalidae	Argynnis	Kate Perez	BIN Taxonomy Match	July
GMTPZ	GMGMM	GMGMM005-14	Specimen on BOLD	BIOUG17296-A03	GMP#06028	BOLD:AAA8958	BIN on BOLD	BIOUG17296-A03	579	15-Jul-2014	Lepidoptera	Nymphalidae	Argynnis	Kate Perez	BIN Taxonomy Match	July
GMTPZ	GMGMM	GMGMM006-14	Specimen on BOLD	BIOUG17296-A04	GMP#06028	BOLD:AAA8958	BIN on BOLD	BIOUG17296-A04	579	15-Jul-2014	Lepidoptera	Nymphalidae	Argynnis	Kate Perez	BIN Taxonomy Match	July
GMTPZ	GMGMM	GMGMM007-14	Specimen on BOLD	BIOUG17296-A05	GMP#06028	BOLD:AAA8958	BIN on BOLD	BIOUG17296-A05	579	15-Jul-2014	Lepidoptera	Nymphalidae	Argynnis	Kate Perez	BIN Taxonomy Match	July
GMTPZ	GMGMN	GMGMN072-14	Specimen on BOLD	BIOUG17381-B09	GMP#06029	BOLD:AAA8958	BIN on BOLD	BIOUG17381-B09	549	29-Jul-2014	Lepidoptera	Nymphalidae	Argynnis	Kate Perez	BIN Taxonomy Match	July
GMTPZ	GMGMN	GMGMN088-14	Specimen on BOLD	BIOUG17381-D01	GMP#06029	BOLD:AAA8958	BIN on BOLD	BIOUG17381-D01	579	29-Jul-2014	Lepidoptera	Nymphalidae	Argynnis	Kate Perez	BIN Taxonomy Match	July
GMTPZ	GMGMN	GMGMN093-14	Specimen on BOLD	BIOUG17381-D06	GMP#06029	BOLD:AAA8958	BIN on BOLD	BIOUG17381-D06	579	29-Jul-2014	Lepidoptera	Nymphalidae	Argynnis	Kate Perez	BIN Taxonomy Match	July
GMTPZ	GMGMD	GMGMD007-14	Specimen on BOLD	BIOUG16357-D08	GMP#06018	BOLD:AAA9222	BIN on BOLD	BIOUG16357-D08	579	16-Sep-2013	Lepidoptera	Pieridae	Gonopteryx	Kate Perez	BOLD ID Engine Manual	September
GMTPZ	GMGMK	GMGMK176-14	Specimen on BOLD	BIOUG17174-A02	GMP#06026	BOLD:AAA9222	BIN on BOLD	BIOUG17174-A02	552	17-Jun-2014	Lepidoptera	Pieridae	Gonopteryx	Kate Perez	BOLD ID Engine Manual	June
GMTPZ	GMGMN	GMGMN060-14	Specimen on BOLD	BIOUG17381-A09	GMP#06029	BOLD:AAA9222	BIN on BOLD	BIOUG17381-A09	588	29-Jul-2014	Lepidoptera	Pieridae	Gonopteryx	Kate Perez	BOLD ID Engine Manual	July
GMTPZ	GMGMN	GMGMN070-14	Specimen on BOLD	BIOUG17381-B07	GMP#06029	BOLD:AAA9222	BIN on BOLD	BIOUG17381-B07	588	29-Jul-2014	Lepidoptera	Pieridae	Gonopteryx	Kate Perez	BOLD ID Engine Manual	July
GMTPZ	GMGMJ	GMGMJ036-14	Specimen on BOLD	BIOUG17068-B03	GMP#06025	BOLD:AAA9652	BIN on BOLD	BIOUG17068-B03	585	02-Jun-2014	Lepidoptera	Nymphalidae	Aglais	Kate Perez	BIN Taxonomy Match	June
GMTPZ	GMGMK	GMGMK177-14	Specimen on BOLD	BIOUG17174-A03	GMP#06026	BOLD:AAA9652	BIN on BOLD	BIOUG17174-A03	588	17-Jun-2014	Lepidoptera	Nymphalidae	Aglais	Kate Perez	BIN Taxonomy Match	June
GMTPZ	GMGMD	GMGMD003-14	Specimen on BOLD	BIOUG16357-D04	GMP#06018	BOLD:AAB0552	BIN on BOLD	BIOUG16357-D04	588	16-Sep-2013	Lepidoptera	Pieridae	Pieris	Kate Perez	BIN Taxonomy Match	September
GMTPZ	GMGMD	GMGMD027-14	Specimen on BOLD	BIOUG16357-F04	GMP#06018	BOLD:AAB0552	BIN on BOLD	BIOUG16357-F04	588	16-Sep-2013	Lepidoptera	Pieridae	Pieris	Kate Perez	BIN Taxonomy Match	September
GMTPZ	GMGMD	GMGMD042-14	Specimen on BOLD	BIOUG16357-G07	GMP#06018	BOLD:AAB0552	BIN on BOLD	BIOUG16357-G07	591	16-Sep-2013	Lepidoptera	Pieridae	Pieris	Kate Perez	BIN Taxonomy Match	September
GMTPZ	GMGMM	GMGMM023-14	Specimen on BOLD	BIOUG17296-B09	GMP#06028	BOLD:AAB0552	BIN on BOLD	BIOUG17296-B09	579	15-Jul-2014	Lepidoptera	Pieridae	Pieris	Kate Perez	BIN Taxonomy Match	July
GMTPZ	GMGMM	GMGMM033-14	Specimen on BOLD	BIOUG17296-C07	GMP#06028	BOLD:AAB0552	BIN on BOLD	BIOUG17296-C07	582	15-Jul-2014	Lepidoptera	Pieridae	Pieris	Kate Perez	BIN Taxonomy Match	July
GMTPZ	GMGMM	GMGMM039-14	Specimen on BOLD	BIOUG17296-D01	GMP#06028	BOLD:AAB0552	BIN on BOLD	BIOUG17296-D01	579	15-Jul-2014	Lepidoptera	Pieridae	Pieris	Kate Perez	BIN Taxonomy Match	July
GMTPZ	GMGMN	GMGMN055-14	Specimen on BOLD	BIOUG17381-A04	GMP#06029	BOLD:AAB0552	BIN on BOLD	BIOUG17381-A04	588	29-Jul-2014	Lepidoptera	Pieridae	Pieris	Kate Perez	BIN Taxonomy Match	July
GMTPZ	GMGMN	GMGMN059-14	Specimen on BOLD	BIOUG17381-A08	GMP#06029	BOLD:AAB0552	BIN on BOLD	BIOUG17381-A08	588	29-Jul-2014	Lepidoptera	Pieridae	Pieris	Kate Perez	BIN Taxonomy Match	July
GMTPZ	GMGMN	GMGMN066-14	Specimen on BOLD	BIOUG17381-B03	GMP#06029	BOLD:AAB0552	BIN on BOLD	BIOUG17381-B03	582	29-Jul-2014	Lepidoptera	Pieridae	Pieris	Kate Perez	BIN Taxonomy Match	July
GMTPZ	GMGMN	GMGMN074-14	Specimen on BOLD	BIOUG17381-B11	GMP#06029	BOLD:AAB0552	BIN on BOLD	BIOUG17381-B11	570	29-Jul-2014	Lepidoptera	Pieridae	Pieris	Kate Perez	BIN Taxonomy Match	July
GMTPZ	GMGMN	GMGMN081-14	Specimen on BOLD	BIOUG17381-C06	GMP#06029	BOLD:AAB0552	BIN on BOLD	BIOUG17381-C06	579	29-Jul-2014	Lepidoptera	Pieridae	Pieris	Kate Perez	BIN Taxonomy Match	July
GMTPZ	GMGMA	GMGMA490-14	Specimen on BOLD	BIOUG16210-A08	GMP#06015	BOLD:AAB0677	BIN on BOLD	BIOUG16210-A08	604	25-Jul-2013	Lepidoptera	Geometridae	Crocallis	Kate Perez	BIN Taxonomy Match	July
GMTPZ	GMGMB	GMGMB007-14	Specimen on BOLD	BIOUG16267-B10	GMP#06017	BOLD:AAB0828	BIN on BOLD	BIOUG16267-B10	591	26-Aug-2013	Lepidoptera	Geometridae	Timandra	Kate Perez	BIN Taxonomy Match	August
GMTPZ	GMGMI	GMGMI220-14	Specimen on BOLD	BIOUG17086-C01	GMP#06024	BOLD:AAB1133	BIN on BOLD	BIOUG17086-C01	537	16-May-2014	Lepidoptera	Pieridae	Anthocharis	Kate Perez	BIN Taxonomy Match	May
GMTPZ	GMGMK	GMGMK810-14	Specimen on BOLD	BIOUG17180-B12	GMP#06026	BOLD:AAB1555	BIN on BOLD	BIOUG17180-B12	555	17-Jun-2014	Lepidoptera	Crambidae	Scoparia	Kate Perez	BIN Taxonomy Match	June
GMTPE	GMGRF	GMGRF3223-13	Specimen on BOLD	BIOUG04991-G11	bayw.11	BOLD:AAB1555	BIN on BOLD	BIOUG04991-G11	562	25-Jul-2012	Lepidoptera	Crambidae	Scoparia	Kate Perez	BIN Taxonomy Match	July
GMTPE	GMGRF	GMGRF3229-13	Specimen on BOLD	BIOUG04991-H05	bayw.11	BOLD:AAB1555	BIN on BOLD	BIOUG04991-H05	593	25-Jul-2012	Lepidoptera	Crambidae	Scoparia	Kate Perez	BIN Taxonomy Match	July
GMTPE	GMGRF	GMGRF3230-13	Specimen on BOLD	BIOUG04991-H06	bayw.11	BOLD:AAB1555	BIN on BOLD	BIOUG04991-H06	592	25-Jul-2012	Lepidoptera	Crambidae	Scoparia	Kate Perez	BIN Taxonomy Match	July
GMTPZ	GMGMA	GMGMA526-14	Specimen on BOLD	BIOUG16210-D08	GMP#06015	BOLD:AAB1940	BIN on BOLD	BIOUG16210-D08	563	25-Jul-2013	Lepidoptera	Nymphalidae	Aphantopus	Kate Perez	BIN Taxonomy Match	July
GMTPZ	GMGMK	GMGMK231-14	Specimen on BOLD	BIOUG17174-E09	GMP#06026	BOLD:AAB2097	BIN on BOLD	BIOUG17174-E09	537	17-Jun-2014	Lepidoptera	Geometridae	Epirrhoe	Kate Perez	BIN Taxonomy Match	June
GMTPZ	GMGMK	GMGMK337-14	Specimen on BOLD	BIOUG17175-F08	GMP#06026	BOLD:AAB2097	BIN on BOLD	BIOUG17175-F08	539	17-Jun-2014	Lepidoptera	Geometridae	Epirrhoe	Kate Perez	BIN Taxonomy Match	June
GMTPZ	GMGMA	GMGMA1067-14	Specimen on BOLD	BIOUG16216-B03	GMP#06015	BOLD:AAB3583	BIN on BOLD	BIOUG16216-B03	589	25-Jul-2013	Lepidoptera	Geometridae	Horisme	Kate Perez	BOLD ID Engine Manual	July
GMTPZ	GMGMB	GMGMB471-14	Specimen on BOLD	BIOUG16272-F06	GMP#06017	BOLD:AAB3583	BIN on BOLD	BIOUG16272-F06	588	26-Aug-2013	Lepidoptera	Geometridae	Horisme	Kate Perez	BOLD ID Engine Manual	August
GMTPZ	GMGMN	GMGMN269-14	Specimen on BOLD	BIOUG17383-C04	GMP#06029	BOLD:AAB3583	BIN on BOLD	BIOUG17383-C04	579	29-Jul-2014	Lepidoptera	Geometridae	Horisme	Kate Perez	BOLD ID Engine Manual	July
GMTPZ	GMGMA	GMGMA1057-14	Specimen on BOLD	BIOUG16216-A05	GMP#06015	BOLD:AAB3829	BIN on BOLD	BIOUG16216-A05	552	25-Jul-2013	Lepidoptera	Crambidae	Eudonia	Kate Perez	BIN Taxonomy Match	July
GMTPZ	GMGMA	GMGMA492-14	Specimen on BOLD	BIOUG16210-A10	GMP#06015	BOLD:AAB4345	BIN on BOLD	BIOUG16210-A10	603	25-Jul-2013	Lepidoptera	Noctuidae	Autographa	Kate Perez	BIN Taxonomy Match	July
GMTPZ	GMGMA	GMGMA493-14	Specimen on BOLD	BIOUG16210-A11	GMP#06015	BOLD:AAB4345	BIN on BOLD	BIOUG16210-A11	531	25-Jul-2013	Lepidoptera	Noctuidae	Autographa	Kate Perez	BIN Taxonomy Match	July
GMTPZ	GMGMA	GMGMA495-14	Specimen on BOLD	BIOUG16210-B01	GMP#06015	BOLD:AAB4345	BIN on BOLD	BIOUG16210-B01	605	25-Jul-2013	Lepidoptera	Noctuidae	Autographa	Kate Perez	BIN Taxonomy Match	July
GMTPZ	GMGMA	GMGMA502-14	Specimen on BOLD	BIOUG16210-B08	GMP#06015	BOLD:AAB4345	BIN on BOLD	BIOUG16210-B08	611	25-Jul-2013	Lepidoptera	Noctuidae	Autographa	Kate Perez	BIN Taxonomy Match	July
GMTPZ	GMGMA	GMGMA503-14	Specimen on BOLD	BIOUG16210-B09	GMP#06015	BOLD:AAB4345	BIN on BOLD	BIOUG16210-B09	621	25-Jul-2013	Lepidoptera	Noctuidae	Autographa	Kate Perez	BIN Taxonomy Match	July
GMTPZ	GMGMA	GMGMA512-14	Specimen on BOLD	BIOUG16210-C06	GMP#06015	BOLD:AAB4345	BIN on BOLD	BIOUG16210-C06	604	25-Jul-2013	Lepidoptera	Noctuidae	Autographa	Kate Perez	BIN Taxonomy Match	July
GMTPZ	GMGMA	GMGMA513-14	Specimen on BOLD	BIOUG16210-C07	GMP#06015	BOLD:AAB4345	BIN on BOLD	BIOUG16210-C07	614	25-Jul-2013	Lepidoptera	Noctuidae	Autographa	Kate Perez	BIN Taxonomy Match	July
GMTPZ	GMGMA	GMGMA514-14	Specimen on BOLD	BIOUG16210-C08	GMP#06015	BOLD:AAB4345	BIN on BOLD	BIOUG16210-C08	584	25-Jul-2013	Lepidoptera	Noctuidae	Autographa	Kate Perez	BIN Taxonomy Match	July
GMTPZ	GMGMA	GMGMA515-14	Specimen on BOLD	BIOUG16210-C09	GMP#06015	BOLD:AAB4345	BIN on BOLD	BIOUG16210-C09	606	25-Jul-2013	Lepidoptera	Noctuidae	Autographa	Kate Perez	BIN Taxonomy Match	July
GMTPZ	GMGMA	GMGMA516-14	Specimen on BOLD	BIOUG16210-C10	GMP#06015	BOLD:AAB4345	BIN on BOLD	BIOUG16210-C10	606	25-Jul-2013	Lepidoptera	Noctuidae	Autographa	Kate Perez	BIN Taxonomy Match	July
GMTPZ	GMGMA	GMGMA517-14	Specimen on BOLD	BIOUG16210-C11	GMP#06015	BOLD:AAB4345	BIN on BOLD	BIOUG16210-C11	512	25-Jul-2013	Lepidoptera	Noctuidae	Autographa	Kate Perez	BIN Taxonomy Match	July
GMTPZ	GMGMA	GMGMA524-14	Specimen on BOLD	BIOUG16210-D06	GMP#06015	BOLD:AAB4345	BIN on BOLD	BIOUG16210-D06	607	25-Jul-2013	Lepidoptera	Noctuidae	Autographa	Kate Perez	BIN Taxonomy Match	July
GMTPZ	GMGMA	GMGMA537-14	Specimen on BOLD	BIOUG16210-E07	GMP#06015	BOLD:AAB4345	BIN on BOLD	BIOUG16210-E07	603	25-Jul-2013	Lepidoptera	Noctuidae	Autographa	Kate Perez	BIN Taxonomy Match	July
GMTPZ	GMGMA	GMGMA578-14	Specimen on BOLD	BIOUG16211-A01	GMP#06015	BOLD:AAB4345	BIN on BOLD	BIOUG16211-A01	602	25-Jul-2013	Lepidoptera	Noctuidae	Autographa	Kate Perez	BIN Taxonomy Match	July
GMTPZ	GMGMA	GMGMA582-14	Specimen on BOLD	BIOUG16211-A05	GMP#06015	BOLD:AAB4345	BIN on BOLD	BIOUG16211-A05	535	25-Jul-2013	Lepidoptera	Noctuidae	Autographa	Kate Perez	BIN Taxonomy Match	July
GMTPZ	GMGMB	GMGMB006-14	Specimen on BOLD	BIOUG16267-B09	GMP#06017	BOLD:AAB4345	BIN on BOLD	BIOUG16267-B09	555	26-Aug-2013	Lepidoptera	Noctuidae	Autographa	Kate Perez	BIN Taxonomy Match	August
GMTPZ	GMGMB	GMGMB014-14	Specimen on BOLD	BIOUG16267-C05	GMP#06017	BOLD:AAB4345	BIN on BOLD	BIOUG16267-C05	564	26-Aug-2013	Lepidoptera	Noctuidae	Autographa	Kate Perez	BIN Taxonomy Match	August
GMTPZ	GMGMB	GMGMB016-14	Specimen on BOLD	BIOUG16267-C07	GMP#06017	BOLD:AAB4345	BIN on BOLD	BIOUG16267-C07	591	26-Aug-2013	Lepidoptera	Noctuidae	Autographa	Kate Perez	BIN Taxonomy Match	August
GMTPZ	GMGMB	GMGMB407-14	Specimen on BOLD	BIOUG16272-A02	GMP#06017	BOLD:AAB4345	BIN on BOLD	BIOUG16272-A02	591	26-Aug-2013	Lepidoptera	Noctuidae	Autographa	Kate Perez	BIN Taxonomy Match	August
GMTPZ	GMGMB	GMGMB408-14	Specimen on BOLD	BIOUG16272-A03	GMP#06017	BOLD:AAB4345	BIN on BOLD	BIOUG16272-A03	564	26-Aug-2013	Lepidoptera	Noctuidae	Autographa	Kate Perez	BIN Taxonomy Match	August
GMTPZ	GMGMB	GMGMB409-14	Specimen on BOLD	BIOUG16272-A04	GMP#06017	BOLD:AAB4345	BIN on BOLD	BIOUG16272-A04	564	26-Aug-2013	Lepidoptera	Noctuidae	Autographa	Kate Perez	BIN Taxonomy Match	August
GMTPZ	GMGMB	GMGMB410-14	Specimen on BOLD	BIOUG16272-A05	GMP#06017	BOLD:AAB4345	BIN on BOLD	BIOUG16272-A05	600	26-Aug-2013	Lepidoptera	Noctuidae	Autographa	Kate Perez	BIN Taxonomy Match	August
GMTPZ	GMGMB	GMGMB412-14	Specimen on BOLD	BIOUG16272-A07	GMP#06017	BOLD:AAB4345	BIN on BOLD	BIOUG16272-A07	588	26-Aug-2013	Lepidoptera	Noctuidae	Autographa	Kate Perez	BIN Taxonomy Match	August
GMTPZ	GMGMB	GMGMB414-14	Specimen on BOLD	BIOUG16272-A09	GMP#06017	BOLD:AAB4345	BIN on BOLD	BIOUG16272-A09	555	26-Aug-2013	Lepidoptera	Noctuidae	Autographa	Kate Perez	BIN Taxonomy Match	August
GMTPZ	GMGMB	GMGMB415-14	Specimen on BOLD	BIOUG16272-A10	GMP#06017	BOLD:AAB4345	BIN on BOLD	BIOUG16272-A10	600	26-Aug-2013	Lepidoptera	Noctuidae	Autographa	Kate Perez	BIN Taxonomy Match	August
GMTPZ	GMGMB	GMGMB420-14	Specimen on BOLD	BIOUG16272-B03	GMP#06017	BOLD:AAB4345	BIN on BOLD	BIOUG16272-B03	588	26-Aug-2013	Lepidoptera	Noctuidae	Autographa	Kate Perez	BIN Taxonomy Match	August
GMTPZ	GMGMB	GMGMB422-14	Specimen on BOLD	BIOUG16272-B05	GMP#06017	BOLD:AAB4345	BIN on BOLD	BIOUG16272-B05	591	26-Aug-2013	Lepidoptera	Noctuidae	Autographa	Kate Perez	BIN Taxonomy Match	August
GMTPZ	GMGMB	GMGMB423-14	Specimen on BOLD	BIOUG16272-B06	GMP#06017	BOLD:AAB4345	BIN on BOLD	BIOUG16272-B06	591	26-Aug-2013	Lepidoptera	Noctuidae	Autographa	Kate Perez	BIN Taxonomy Match	August
GMTPZ	GMGMB	GMGMB426-14	Specimen on BOLD	BIOUG16272-B09	GMP#06017	BOLD:AAB4345	BIN on BOLD	BIOUG16272-B09	600	26-Aug-2013	Lepidoptera	Noctuidae	Autographa	Kate Perez	BIN Taxonomy Match	August
GMTPZ	GMGMB	GMGMB427-14	Specimen on BOLD	BIOUG16272-B10	GMP#06017	BOLD:AAB4345	BIN on BOLD	BIOUG16272-B10	600	26-Aug-2013	Lepidoptera	Noctuidae	Autographa	Kate Perez	BIN Taxonomy Match	August
GMTPZ	GMGMB	GMGMB428-14	Specimen on BOLD	BIOUG16272-B11	GMP#06017	BOLD:AAB4345	BIN on BOLD	BIOUG16272-B11	564	26-Aug-2013	Lepidoptera	Noctuidae	Autographa	Kate Perez	BIN Taxonomy Match	August
GMTPZ	GMGMB	GMGMB429-14	Specimen on BOLD	BIOUG16272-B12	GMP#06017	BOLD:AAB4345	BIN on BOLD	BIOUG16272-B12	603	26-Aug-2013	Lepidoptera	Noctuidae	Autographa	Kate Perez	BIN Taxonomy Match	August
GMTPZ	GMGMB	GMGMB433-14	Specimen on BOLD	BIOUG16272-C04	GMP#06017	BOLD:AAB4345	BIN on BOLD	BIOUG16272-C04	591	26-Aug-2013	Lepidoptera	Noctuidae	Autographa	Kate Perez	BIN Taxonomy Match	August
GMTPZ	GMGMB	GMGMB434-14	Specimen on BOLD	BIOUG16272-C05	GMP#06017	BOLD:AAB4345	BIN on BOLD	BIOUG16272-C05	588	26-Aug-2013	Lepidoptera	Noctuidae	Autographa	Kate Perez	BIN Taxonomy Match	August
GMTPZ	GMGMB	GMGMB435-14	Specimen on BOLD	BIOUG16272-C06	GMP#06017	BOLD:AAB4345	BIN on BOLD	BIOUG16272-C06	594	26-Aug-2013	Lepidoptera	Noctuidae	Autographa	Kate Perez	BIN Taxonomy Match	August
GMTPZ	GMGMB	GMGMB436-14	Specimen on BOLD	BIOUG16272-C07	GMP#06017	BOLD:AAB4345	BIN on BOLD	BIOUG16272-C07	588	26-Aug-2013	Lepidoptera	Noctuidae	Autographa	Kate Perez	BIN Taxonomy Match	August
GMTPZ	GMGMB	GMGMB438-14	Specimen on BOLD	BIOUG16272-C09	GMP#06017	BOLD:AAB4345	BIN on BOLD	BIOUG16272-C09	591	26-Aug-2013	Lepidoptera	Noctuidae	Autographa	Kate Perez	BIN Taxonomy Match	August
GMTPZ	GMGMB	GMGMB439-14	Specimen on BOLD	BIOUG16272-C10	GMP#06017	BOLD:AAB4345	BIN on BOLD	BIOUG16272-C10	603	26-Aug-2013	Lepidoptera	Noctuidae	Autographa	Kate Perez	BIN Taxonomy Match	August
GMTPZ	GMGMB	GMGMB440-14	Specimen on BOLD	BIOUG16272-C11	GMP#06017	BOLD:AAB4345	BIN on BOLD	BIOUG16272-C11	600	26-Aug-2013	Lepidoptera	Noctuidae	Autographa	Kate Perez	BIN Taxonomy Match	August
GMTPZ	GMGMB	GMGMB441-14	Specimen on BOLD	BIOUG16272-C12	GMP#06017	BOLD:AAB4345	BIN on BOLD	BIOUG16272-C12	588	26-Aug-2013	Lepidoptera	Noctuidae	Autographa	Kate Perez	BIN Taxonomy Match	August
GMTPZ	GMGMB	GMGMB442-14	Specimen on BOLD	BIOUG16272-D01	GMP#06017	BOLD:AAB4345	BIN on BOLD	BIOUG16272-D01	588	26-Aug-2013	Lepidoptera	Noctuidae	Autographa	Kate Perez	BIN Taxonomy Match	August
GMTPZ	GMGMB	GMGMB443-14	Specimen on BOLD	BIOUG16272-D02	GMP#06017	BOLD:AAB4345	BIN on BOLD	BIOUG16272-D02	588	26-Aug-2013	Lepidoptera	Noctuidae	Autographa	Kate Perez	BIN Taxonomy Match	August
GMTPZ	GMGMB	GMGMB444-14	Specimen on BOLD	BIOUG16272-D03	GMP#06017	BOLD:AAB4345	BIN on BOLD	BIOUG16272-D03	591	26-Aug-2013	Lepidoptera	Noctuidae	Autographa	Kate Perez	BIN Taxonomy Match	August
GMTPZ	GMGMB	GMGMB445-14	Specimen on BOLD	BIOUG16272-D04	GMP#06017	BOLD:AAB4345	BIN on BOLD	BIOUG16272-D04	591	26-Aug-2013	Lepidoptera	Noctuidae	Autographa	Kate Perez	BIN Taxonomy Match	August
GMTPZ	GMGMB	GMGMB447-14	Specimen on BOLD	BIOUG16272-D06	GMP#06017	BOLD:AAB4345	BIN on BOLD	BIOUG16272-D06	603	26-Aug-2013	Lepidoptera	Noctuidae	Autographa	Kate Perez	BIN Taxonomy Match	August
GMTPZ	GMGMB	GMGMB448-14	Specimen on BOLD	BIOUG16272-D07	GMP#06017	BOLD:AAB4345	BIN on BOLD	BIOUG16272-D07	591	26-Aug-2013	Lepidoptera	Noctuidae	Autographa	Kate Perez	BIN Taxonomy Match	August
GMTPZ	GMGMB	GMGMB449-14	Specimen on BOLD	BIOUG16272-D08	GMP#06017	BOLD:AAB4345	BIN on BOLD	BIOUG16272-D08	588	26-Aug-2013	Lepidoptera	Noctuidae	Autographa	Kate Perez	BIN Taxonomy Match	August
GMTPZ	GMGMB	GMGMB452-14	Specimen on BOLD	BIOUG16272-D11	GMP#06017	BOLD:AAB4345	BIN on BOLD	BIOUG16272-D11	600	26-Aug-2013	Lepidoptera	Noctuidae	Autographa	Kate Perez	BIN Taxonomy Match	August
GMTPZ	GMGMB	GMGMB453-14	Specimen on BOLD	BIOUG16272-D12	GMP#06017	BOLD:AAB4345	BIN on BOLD	BIOUG16272-D12	603	26-Aug-2013	Lepidoptera	Noctuidae	Autographa	Kate Perez	BIN Taxonomy Match	August
GMTPZ	GMGMB	GMGMB454-14	Specimen on BOLD	BIOUG16272-E01	GMP#06017	BOLD:AAB4345	BIN on BOLD	BIOUG16272-E01	588	26-Aug-2013	Lepidoptera	Noctuidae	Autographa	Kate Perez	BIN Taxonomy Match	August
GMTPZ	GMGMB	GMGMB455-14	Specimen on BOLD	BIOUG16272-E02	GMP#06017	BOLD:AAB4345	BIN on BOLD	BIOUG16272-E02	588	26-Aug-2013	Lepidoptera	Noctuidae	Autographa	Kate Perez	BIN Taxonomy Match	August
GMTPZ	GMGMB	GMGMB456-14	Specimen on BOLD	BIOUG16272-E03	GMP#06017	BOLD:AAB4345	BIN on BOLD	BIOUG16272-E03	588	26-Aug-2013	Lepidoptera	Noctuidae	Autographa	Kate Perez	BIN Taxonomy Match	August
GMTPZ	GMGMB	GMGMB457-14	Specimen on BOLD	BIOUG16272-E04	GMP#06017	BOLD:AAB4345	BIN on BOLD	BIOUG16272-E04	591	26-Aug-2013	Lepidoptera	Noctuidae	Autographa	Kate Perez	BIN Taxonomy Match	August
GMTPZ	GMGMB	GMGMB458-14	Specimen on BOLD	BIOUG16272-E05	GMP#06017	BOLD:AAB4345	BIN on BOLD	BIOUG16272-E05	588	26-Aug-2013	Lepidoptera	Noctuidae	Autographa	Kate Perez	BIN Taxonomy Match	August
GMTPZ	GMGMB	GMGMB460-14	Specimen on BOLD	BIOUG16272-E07	GMP#06017	BOLD:AAB4345	BIN on BOLD	BIOUG16272-E07	588	26-Aug-2013	Lepidoptera	Noctuidae	Autographa	Kate Perez	BIN Taxonomy Match	August
GMTPZ	GMGMB	GMGMB461-14	Specimen on BOLD	BIOUG16272-E08	GMP#06017	BOLD:AAB4345	BIN on BOLD	BIOUG16272-E08	600	26-Aug-2013	Lepidoptera	Noctuidae	Autographa	Kate Perez	BIN Taxonomy Match	August
GMTPZ	GMGMB	GMGMB464-14	Specimen on BOLD	BIOUG16272-E11	GMP#06017	BOLD:AAB4345	BIN on BOLD	BIOUG16272-E11	588	26-Aug-2013	Lepidoptera	Noctuidae	Autographa	Kate Perez	BIN Taxonomy Match	August
GMTPZ	GMGMB	GMGMB465-14	Specimen on BOLD	BIOUG16272-E12	GMP#06017	BOLD:AAB4345	BIN on BOLD	BIOUG16272-E12	600	26-Aug-2013	Lepidoptera	Noctuidae	Autographa	Kate Perez	BIN Taxonomy Match	August
GMTPZ	GMGMB	GMGMB467-14	Specimen on BOLD	BIOUG16272-F02	GMP#06017	BOLD:AAB4345	BIN on BOLD	BIOUG16272-F02	576	26-Aug-2013	Lepidoptera	Noctuidae	Autographa	Kate Perez	BIN Taxonomy Match	August
GMTPZ	GMGMB	GMGMB468-14	Specimen on BOLD	BIOUG16272-F03	GMP#06017	BOLD:AAB4345	BIN on BOLD	BIOUG16272-F03	600	26-Aug-2013	Lepidoptera	Noctuidae	Autographa	Kate Perez	BIN Taxonomy Match	August
GMTPZ	GMGMB	GMGMB469-14	Specimen on BOLD	BIOUG16272-F04	GMP#06017	BOLD:AAB4345	BIN on BOLD	BIOUG16272-F04	591	26-Aug-2013	Lepidoptera	Noctuidae	Autographa	Kate Perez	BIN Taxonomy Match	August
GMTPZ	GMGMB	GMGMB472-14	Specimen on BOLD	BIOUG16272-F07	GMP#06017	BOLD:AAB4345	BIN on BOLD	BIOUG16272-F07	600	26-Aug-2013	Lepidoptera	Noctuidae	Autographa	Kate Perez	BIN Taxonomy Match	August
GMTPZ	GMGMB	GMGMB473-14	Specimen on BOLD	BIOUG16272-F08	GMP#06017	BOLD:AAB4345	BIN on BOLD	BIOUG16272-F08	591	26-Aug-2013	Lepidoptera	Noctuidae	Autographa	Kate Perez	BIN Taxonomy Match	August
GMTPZ	GMGMB	GMGMB474-14	Specimen on BOLD	BIOUG16272-F09	GMP#06017	BOLD:AAB4345	BIN on BOLD	BIOUG16272-F09	591	26-Aug-2013	Lepidoptera	Noctuidae	Autographa	Kate Perez	BIN Taxonomy Match	August
GMTPZ	GMGMB	GMGMB476-14	Specimen on BOLD	BIOUG16272-F11	GMP#06017	BOLD:AAB4345	BIN on BOLD	BIOUG16272-F11	600	26-Aug-2013	Lepidoptera	Noctuidae	Autographa	Kate Perez	BIN Taxonomy Match	August
GMTPZ	GMGMB	GMGMB478-14	Specimen on BOLD	BIOUG16272-G01	GMP#06017	BOLD:AAB4345	BIN on BOLD	BIOUG16272-G01	600	26-Aug-2013	Lepidoptera	Noctuidae	Autographa	Kate Perez	BIN Taxonomy Match	August
GMTPZ	GMGMB	GMGMB479-14	Specimen on BOLD	BIOUG16272-G02	GMP#06017	BOLD:AAB4345	BIN on BOLD	BIOUG16272-G02	555	26-Aug-2013	Lepidoptera	Noctuidae	Autographa	Kate Perez	BIN Taxonomy Match	August
GMTPZ	GMGMB	GMGMB480-14	Specimen on BOLD	BIOUG16272-G03	GMP#06017	BOLD:AAB4345	BIN on BOLD	BIOUG16272-G03	564	26-Aug-2013	Lepidoptera	Noctuidae	Autographa	Kate Perez	BIN Taxonomy Match	August
GMTPZ	GMGMB	GMGMB481-14	Specimen on BOLD	BIOUG16272-G04	GMP#06017	BOLD:AAB4345	BIN on BOLD	BIOUG16272-G04	555	26-Aug-2013	Lepidoptera	Noctuidae	Autographa	Kate Perez	BIN Taxonomy Match	August
GMTPZ	GMGMB	GMGMB483-14	Specimen on BOLD	BIOUG16272-G06	GMP#06017	BOLD:AAB4345	BIN on BOLD	BIOUG16272-G06	588	26-Aug-2013	Lepidoptera	Noctuidae	Autographa	Kate Perez	BIN Taxonomy Match	August
GMTPZ	GMGMB	GMGMB484-14	Specimen on BOLD	BIOUG16272-G07	GMP#06017	BOLD:AAB4345	BIN on BOLD	BIOUG16272-G07	588	26-Aug-2013	Lepidoptera	Noctuidae	Autographa	Kate Perez	BIN Taxonomy Match	August
GMTPZ	GMGMB	GMGMB486-14	Specimen on BOLD	BIOUG16272-G09	GMP#06017	BOLD:AAB4345	BIN on BOLD	BIOUG16272-G09	591	26-Aug-2013	Lepidoptera	Noctuidae	Autographa	Kate Perez	BIN Taxonomy Match	August
GMTPZ	GMGMB	GMGMB487-14	Specimen on BOLD	BIOUG16272-G10	GMP#06017	BOLD:AAB4345	BIN on BOLD	BIOUG16272-G10	579	26-Aug-2013	Lepidoptera	Noctuidae	Autographa	Kate Perez	BIN Taxonomy Match	August
GMTPZ	GMGMB	GMGMB488-14	Specimen on BOLD	BIOUG16272-G11	GMP#06017	BOLD:AAB4345	BIN on BOLD	BIOUG16272-G11	600	26-Aug-2013	Lepidoptera	Noctuidae	Autographa	Kate Perez	BIN Taxonomy Match	August
GMTPZ	GMGMB	GMGMB489-14	Specimen on BOLD	BIOUG16272-G12	GMP#06017	BOLD:AAB4345	BIN on BOLD	BIOUG16272-G12	564	26-Aug-2013	Lepidoptera	Noctuidae	Autographa	Kate Perez	BIN Taxonomy Match	August
GMTPZ	GMGMB	GMGMB490-14	Specimen on BOLD	BIOUG16272-H01	GMP#06017	BOLD:AAB4345	BIN on BOLD	BIOUG16272-H01	588	26-Aug-2013	Lepidoptera	Noctuidae	Autographa	Kate Perez	BIN Taxonomy Match	August
GMTPZ	GMGMB	GMGMB491-14	Specimen on BOLD	BIOUG16272-H02	GMP#06017	BOLD:AAB4345	BIN on BOLD	BIOUG16272-H02	588	26-Aug-2013	Lepidoptera	Noctuidae	Autographa	Kate Perez	BIN Taxonomy Match	August
GMTPZ	GMGMB	GMGMB492-14	Specimen on BOLD	BIOUG16272-H03	GMP#06017	BOLD:AAB4345	BIN on BOLD	BIOUG16272-H03	588	26-Aug-2013	Lepidoptera	Noctuidae	Autographa	Kate Perez	BIN Taxonomy Match	August
GMTPZ	GMGMB	GMGMB493-14	Specimen on BOLD	BIOUG16272-H04	GMP#06017	BOLD:AAB4345	BIN on BOLD	BIOUG16272-H04	588	26-Aug-2013	Lepidoptera	Noctuidae	Autographa	Kate Perez	BIN Taxonomy Match	August
GMTPZ	GMGMB	GMGMB494-14	Specimen on BOLD	BIOUG16272-H05	GMP#06017	BOLD:AAB4345	BIN on BOLD	BIOUG16272-H05	588	26-Aug-2013	Lepidoptera	Noctuidae	Autographa	Kate Perez	BIN Taxonomy Match	August
GMTPZ	GMGMB	GMGMB495-14	Specimen on BOLD	BIOUG16272-H06	GMP#06017	BOLD:AAB4345	BIN on BOLD	BIOUG16272-H06	591	26-Aug-2013	Lepidoptera	Noctuidae	Autographa	Kate Perez	BIN Taxonomy Match	August
GMTPZ	GMGMB	GMGMB496-14	Specimen on BOLD	BIOUG16272-H07	GMP#06017	BOLD:AAB4345	BIN on BOLD	BIOUG16272-H07	588	26-Aug-2013	Lepidoptera	Noctuidae	Autographa	Kate Perez	BIN Taxonomy Match	August
GMTPZ	GMGMB	GMGMB497-14	Specimen on BOLD	BIOUG16272-H08	GMP#06017	BOLD:AAB4345	BIN on BOLD	BIOUG16272-H08	588	26-Aug-2013	Lepidoptera	Noctuidae	Autographa	Kate Perez	BIN Taxonomy Match	August
GMTPZ	GMGMB	GMGMB569-14	Specimen on BOLD	BIOUG16273-F09	GMP#06017	BOLD:AAB4345	BIN on BOLD	BIOUG16273-F09	588	26-Aug-2013	Lepidoptera	Noctuidae	Autographa	Kate Perez	BIN Taxonomy Match	August
GMTPZ	GMGMB	GMGMB570-14	Specimen on BOLD	BIOUG16273-F10	GMP#06017	BOLD:AAB4345	BIN on BOLD	BIOUG16273-F10	591	26-Aug-2013	Lepidoptera	Noctuidae	Autographa	Kate Perez	BIN Taxonomy Match	August
GMTPZ	GMGMB	GMGMB571-14	Specimen on BOLD	BIOUG16273-F11	GMP#06017	BOLD:AAB4345	BIN on BOLD	BIOUG16273-F11	588	26-Aug-2013	Lepidoptera	Noctuidae	Autographa	Kate Perez	BIN Taxonomy Match	August
GMTPZ	GMGMC	GMGMC001-14	Specimen on BOLD	BIOUG16353-B10	GMP#06016	BOLD:AAB4345	BIN on BOLD	BIOUG16353-B10	582	08-Aug-2013	Lepidoptera	Noctuidae	Autographa	Kate Perez	BIN Taxonomy Match	August
GMTPZ	GMGMC	GMGMC002-14	Specimen on BOLD	BIOUG16353-B11	GMP#06016	BOLD:AAB4345	BIN on BOLD	BIOUG16353-B11	591	08-Aug-2013	Lepidoptera	Noctuidae	Autographa	Kate Perez	BIN Taxonomy Match	August
GMTPZ	GMGMC	GMGMC003-14	Specimen on BOLD	BIOUG16353-B12	GMP#06016	BOLD:AAB4345	BIN on BOLD	BIOUG16353-B12	588	08-Aug-2013	Lepidoptera	Noctuidae	Autographa	Kate Perez	BIN Taxonomy Match	August
GMTPZ	GMGMC	GMGMC005-14	Specimen on BOLD	BIOUG16353-C02	GMP#06016	BOLD:AAB4345	BIN on BOLD	BIOUG16353-C02	573	08-Aug-2013	Lepidoptera	Noctuidae	Autographa	Kate Perez	BIN Taxonomy Match	August
GMTPZ	GMGMC	GMGMC006-14	Specimen on BOLD	BIOUG16353-C03	GMP#06016	BOLD:AAB4345	BIN on BOLD	BIOUG16353-C03	588	08-Aug-2013	Lepidoptera	Noctuidae	Autographa	Kate Perez	BIN Taxonomy Match	August
GMTPZ	GMGMC	GMGMC007-14	Specimen on BOLD	BIOUG16353-C04	GMP#06016	BOLD:AAB4345	BIN on BOLD	BIOUG16353-C04	600	08-Aug-2013	Lepidoptera	Noctuidae	Autographa	Kate Perez	BIN Taxonomy Match	August
GMTPZ	GMGMC	GMGMC008-14	Specimen on BOLD	BIOUG16353-C05	GMP#06016	BOLD:AAB4345	BIN on BOLD	BIOUG16353-C05	597	08-Aug-2013	Lepidoptera	Noctuidae	Autographa	Kate Perez	BIN Taxonomy Match	August
GMTPZ	GMGMC	GMGMC009-14	Specimen on BOLD	BIOUG16353-C06	GMP#06016	BOLD:AAB4345	BIN on BOLD	BIOUG16353-C06	588	08-Aug-2013	Lepidoptera	Noctuidae	Autographa	Kate Perez	BIN Taxonomy Match	August
GMTPZ	GMGMC	GMGMC011-14	Specimen on BOLD	BIOUG16353-C08	GMP#06016	BOLD:AAB4345	BIN on BOLD	BIOUG16353-C08	585	08-Aug-2013	Lepidoptera	Noctuidae	Autographa	Kate Perez	BIN Taxonomy Match	August
GMTPZ	GMGMC	GMGMC012-14	Specimen on BOLD	BIOUG16353-C09	GMP#06016	BOLD:AAB4345	BIN on BOLD	BIOUG16353-C09	591	08-Aug-2013	Lepidoptera	Noctuidae	Autographa	Kate Perez	BIN Taxonomy Match	August
GMTPZ	GMGMC	GMGMC013-14	Specimen on BOLD	BIOUG16353-C10	GMP#06016	BOLD:AAB4345	BIN on BOLD	BIOUG16353-C10	603	08-Aug-2013	Lepidoptera	Noctuidae	Autographa	Kate Perez	BIN Taxonomy Match	August
GMTPZ	GMGMC	GMGMC015-14	Specimen on BOLD	BIOUG16353-C12	GMP#06016	BOLD:AAB4345	BIN on BOLD	BIOUG16353-C12	588	08-Aug-2013	Lepidoptera	Noctuidae	Autographa	Kate Perez	BIN Taxonomy Match	August
GMTPZ	GMGMC	GMGMC019-14	Specimen on BOLD	BIOUG16353-D04	GMP#06016	BOLD:AAB4345	BIN on BOLD	BIOUG16353-D04	600	08-Aug-2013	Lepidoptera	Noctuidae	Autographa	Kate Perez	BIN Taxonomy Match	August
GMTPZ	GMGMC	GMGMC020-14	Specimen on BOLD	BIOUG16353-D05	GMP#06016	BOLD:AAB4345	BIN on BOLD	BIOUG16353-D05	600	08-Aug-2013	Lepidoptera	Noctuidae	Autographa	Kate Perez	BIN Taxonomy Match	August
GMTPZ	GMGMC	GMGMC021-14	Specimen on BOLD	BIOUG16353-D06	GMP#06016	BOLD:AAB4345	BIN on BOLD	BIOUG16353-D06	588	08-Aug-2013	Lepidoptera	Noctuidae	Autographa	Kate Perez	BIN Taxonomy Match	August
GMTPZ	GMGMC	GMGMC026-14	Specimen on BOLD	BIOUG16353-D11	GMP#06016	BOLD:AAB4345	BIN on BOLD	BIOUG16353-D11	600	08-Aug-2013	Lepidoptera	Noctuidae	Autographa	Kate Perez	BIN Taxonomy Match	August
GMTPZ	GMGMC	GMGMC028-14	Specimen on BOLD	BIOUG16353-E01	GMP#06016	BOLD:AAB4345	BIN on BOLD	BIOUG16353-E01	591	08-Aug-2013	Lepidoptera	Noctuidae	Autographa	Kate Perez	BIN Taxonomy Match	August
GMTPZ	GMGMC	GMGMC029-14	Specimen on BOLD	BIOUG16353-E02	GMP#06016	BOLD:AAB4345	BIN on BOLD	BIOUG16353-E02	561	08-Aug-2013	Lepidoptera	Noctuidae	Autographa	Kate Perez	BIN Taxonomy Match	August
GMTPZ	GMGMC	GMGMC033-14	Specimen on BOLD	BIOUG16353-E06	GMP#06016	BOLD:AAB4345	BIN on BOLD	BIOUG16353-E06	591	08-Aug-2013	Lepidoptera	Noctuidae	Autographa	Kate Perez	BIN Taxonomy Match	August
GMTPZ	GMGMC	GMGMC034-14	Specimen on BOLD	BIOUG16353-E07	GMP#06016	BOLD:AAB4345	BIN on BOLD	BIOUG16353-E07	591	08-Aug-2013	Lepidoptera	Noctuidae	Autographa	Kate Perez	BIN Taxonomy Match	August
GMTPZ	GMGMC	GMGMC036-14	Specimen on BOLD	BIOUG16353-E09	GMP#06016	BOLD:AAB4345	BIN on BOLD	BIOUG16353-E09	600	08-Aug-2013	Lepidoptera	Noctuidae	Autographa	Kate Perez	BIN Taxonomy Match	August
GMTPZ	GMGMC	GMGMC037-14	Specimen on BOLD	BIOUG16353-E10	GMP#06016	BOLD:AAB4345	BIN on BOLD	BIOUG16353-E10	600	08-Aug-2013	Lepidoptera	Noctuidae	Autographa	Kate Perez	BIN Taxonomy Match	August
GMTPZ	GMGMC	GMGMC038-14	Specimen on BOLD	BIOUG16353-E11	GMP#06016	BOLD:AAB4345	BIN on BOLD	BIOUG16353-E11	591	08-Aug-2013	Lepidoptera	Noctuidae	Autographa	Kate Perez	BIN Taxonomy Match	August
GMTPZ	GMGMC	GMGMC039-14	Specimen on BOLD	BIOUG16353-E12	GMP#06016	BOLD:AAB4345	BIN on BOLD	BIOUG16353-E12	579	08-Aug-2013	Lepidoptera	Noctuidae	Autographa	Kate Perez	BIN Taxonomy Match	August
GMTPZ	GMGMC	GMGMC041-14	Specimen on BOLD	BIOUG16353-F02	GMP#06016	BOLD:AAB4345	BIN on BOLD	BIOUG16353-F02	600	08-Aug-2013	Lepidoptera	Noctuidae	Autographa	Kate Perez	BIN Taxonomy Match	August
GMTPZ	GMGMC	GMGMC043-14	Specimen on BOLD	BIOUG16353-F04	GMP#06016	BOLD:AAB4345	BIN on BOLD	BIOUG16353-F04	600	08-Aug-2013	Lepidoptera	Noctuidae	Autographa	Kate Perez	BIN Taxonomy Match	August
GMTPZ	GMGMC	GMGMC044-14	Specimen on BOLD	BIOUG16353-F05	GMP#06016	BOLD:AAB4345	BIN on BOLD	BIOUG16353-F05	603	08-Aug-2013	Lepidoptera	Noctuidae	Autographa	Kate Perez	BIN Taxonomy Match	August
GMTPZ	GMGMC	GMGMC243-14	Specimen on BOLD	BIOUG16357-B01	GMP#06016	BOLD:AAB4345	BIN on BOLD	BIOUG16357-B01	608	08-Aug-2013	Lepidoptera	Noctuidae	Autographa	Kate Perez	BIN Taxonomy Match	August
GMTPZ	GMGMC	GMGMC244-14	Specimen on BOLD	BIOUG16357-B02	GMP#06016	BOLD:AAB4345	BIN on BOLD	BIOUG16357-B02	579	08-Aug-2013	Lepidoptera	Noctuidae	Autographa	Kate Perez	BIN Taxonomy Match	August
GMTPZ	GMGMC	GMGMC245-14	Specimen on BOLD	BIOUG16357-B03	GMP#06016	BOLD:AAB4345	BIN on BOLD	BIOUG16357-B03	600	08-Aug-2013	Lepidoptera	Noctuidae	Autographa	Kate Perez	BIN Taxonomy Match	August
GMTPZ	GMGMC	GMGMC246-14	Specimen on BOLD	BIOUG16357-B04	GMP#06016	BOLD:AAB4345	BIN on BOLD	BIOUG16357-B04	588	08-Aug-2013	Lepidoptera	Noctuidae	Autographa	Kate Perez	BIN Taxonomy Match	August
GMTPZ	GMGMC	GMGMC247-14	Specimen on BOLD	BIOUG16357-B05	GMP#06016	BOLD:AAB4345	BIN on BOLD	BIOUG16357-B05	591	08-Aug-2013	Lepidoptera	Noctuidae	Autographa	Kate Perez	BIN Taxonomy Match	August
GMTPZ	GMGMC	GMGMC248-14	Specimen on BOLD	BIOUG16357-B06	GMP#06016	BOLD:AAB4345	BIN on BOLD	BIOUG16357-B06	579	08-Aug-2013	Lepidoptera	Noctuidae	Autographa	Kate Perez	BIN Taxonomy Match	August
GMTPZ	GMGMC	GMGMC249-14	Specimen on BOLD	BIOUG16357-B07	GMP#06016	BOLD:AAB4345	BIN on BOLD	BIOUG16357-B07	591	08-Aug-2013	Lepidoptera	Noctuidae	Autographa	Kate Perez	BIN Taxonomy Match	August
GMTPZ	GMGMD	GMGMD013-14	Specimen on BOLD	BIOUG16357-E02	GMP#06018	BOLD:AAB4345	BIN on BOLD	BIOUG16357-E02	594	16-Sep-2013	Lepidoptera	Noctuidae	Autographa	Kate Perez	BIN Taxonomy Match	September
GMTPZ	GMGMD	GMGMD016-14	Specimen on BOLD	BIOUG16357-E05	GMP#06018	BOLD:AAB4345	BIN on BOLD	BIOUG16357-E05	588	16-Sep-2013	Lepidoptera	Noctuidae	Autographa	Kate Perez	BIN Taxonomy Match	September
GMTPZ	GMGMD	GMGMD026-14	Specimen on BOLD	BIOUG16357-F03	GMP#06018	BOLD:AAB4345	BIN on BOLD	BIOUG16357-F03	588	16-Sep-2013	Lepidoptera	Noctuidae	Autographa	Kate Perez	BIN Taxonomy Match	September
GMTPZ	GMGMD	GMGMD030-14	Specimen on BOLD	BIOUG16357-F07	GMP#06018	BOLD:AAB4345	BIN on BOLD	BIOUG16357-F07	591	16-Sep-2013	Lepidoptera	Noctuidae	Autographa	Kate Perez	BIN Taxonomy Match	September
GMTPZ	GMGMD	GMGMD031-14	Specimen on BOLD	BIOUG16357-F08	GMP#06018	BOLD:AAB4345	BIN on BOLD	BIOUG16357-F08	567	16-Sep-2013	Lepidoptera	Noctuidae	Autographa	Kate Perez	BIN Taxonomy Match	September
GMTPZ	GMGMD	GMGMD032-14	Specimen on BOLD	BIOUG16357-F09	GMP#06018	BOLD:AAB4345	BIN on BOLD	BIOUG16357-F09	555	16-Sep-2013	Lepidoptera	Noctuidae	Autographa	Kate Perez	BIN Taxonomy Match	September
GMTPZ	GMGMD	GMGMD035-14	Specimen on BOLD	BIOUG16357-F12	GMP#06018	BOLD:AAB4345	BIN on BOLD	BIOUG16357-F12	588	16-Sep-2013	Lepidoptera	Noctuidae	Autographa	Kate Perez	BIN Taxonomy Match	September
GMTPZ	GMGMD	GMGMD036-14	Specimen on BOLD	BIOUG16357-G01	GMP#06018	BOLD:AAB4345	BIN on BOLD	BIOUG16357-G01	579	16-Sep-2013	Lepidoptera	Noctuidae	Autographa	Kate Perez	BIN Taxonomy Match	September
GMTPZ	GMGMD	GMGMD038-14	Specimen on BOLD	BIOUG16357-G03	GMP#06018	BOLD:AAB4345	BIN on BOLD	BIOUG16357-G03	579	16-Sep-2013	Lepidoptera	Noctuidae	Autographa	Kate Perez	BIN Taxonomy Match	September
GMTPZ	GMGMD	GMGMD039-14	Specimen on BOLD	BIOUG16357-G04	GMP#06018	BOLD:AAB4345	BIN on BOLD	BIOUG16357-G04	591	16-Sep-2013	Lepidoptera	Noctuidae	Autographa	Kate Perez	BIN Taxonomy Match	September
GMTPZ	GMGMD	GMGMD049-14	Specimen on BOLD	BIOUG16357-H02	GMP#06018	BOLD:AAB4345	BIN on BOLD	BIOUG16357-H02	579	16-Sep-2013	Lepidoptera	Noctuidae	Autographa	Kate Perez	BIN Taxonomy Match	September
GMTPZ	GMGMD	GMGMD055-14	Specimen on BOLD	BIOUG16357-H08	GMP#06018	BOLD:AAB4345	BIN on BOLD	BIOUG16357-H08	588	16-Sep-2013	Lepidoptera	Noctuidae	Autographa	Kate Perez	BIN Taxonomy Match	September
GMTPZ	GMGMD	GMGMD056-14	Specimen on BOLD	BIOUG16357-H09	GMP#06018	BOLD:AAB4345	BIN on BOLD	BIOUG16357-H09	588	16-Sep-2013	Lepidoptera	Noctuidae	Autographa	Kate Perez	BIN Taxonomy Match	September
GMTPZ	GMGML	GMGML045-14	Specimen on BOLD	BIOUG17228-D05	GMP#06027	BOLD:AAB4345	BIN on BOLD	BIOUG17228-D05	578	01-Jul-2014	Lepidoptera	Noctuidae	Autographa	Kate Perez	BIN Taxonomy Match	July
GMTPZ	GMGMM	GMGMM055-14	Specimen on BOLD	BIOUG17296-E05	GMP#06028	BOLD:AAB4345	BIN on BOLD	BIOUG17296-E05	585	15-Jul-2014	Lepidoptera	Noctuidae	Autographa	Kate Perez	BIN Taxonomy Match	July
GMTPZ	GMGMM	GMGMM059-14	Specimen on BOLD	BIOUG17296-E09	GMP#06028	BOLD:AAB4345	BIN on BOLD	BIOUG17296-E09	579	15-Jul-2014	Lepidoptera	Noctuidae	Autographa	Kate Perez	BIN Taxonomy Match	July
GMTPZ	GMGMM	GMGMM081-14	Specimen on BOLD	BIOUG17296-G07	GMP#06028	BOLD:AAB4345	BIN on BOLD	BIOUG17296-G07	594	15-Jul-2014	Lepidoptera	Noctuidae	Autographa	Kate Perez	BIN Taxonomy Match	July
GMTPZ	GMGMM	GMGMM084-14	Specimen on BOLD	BIOUG17296-G10	GMP#06028	BOLD:AAB4345	BIN on BOLD	BIOUG17296-G10	591	15-Jul-2014	Lepidoptera	Noctuidae	Autographa	Kate Perez	BIN Taxonomy Match	July
GMTPZ	GMGMM	GMGMM085-14	Specimen on BOLD	BIOUG17296-G11	GMP#06028	BOLD:AAB4345	BIN on BOLD	BIOUG17296-G11	576	15-Jul-2014	Lepidoptera	Noctuidae	Autographa	Kate Perez	BIN Taxonomy Match	July
GMTPZ	GMGMM	GMGMM089-14	Specimen on BOLD	BIOUG17296-H03	GMP#06028	BOLD:AAB4345	BIN on BOLD	BIOUG17296-H03	585	15-Jul-2014	Lepidoptera	Noctuidae	Autographa	Kate Perez	BIN Taxonomy Match	July
GMTPZ	GMGMM	GMGMM091-14	Specimen on BOLD	BIOUG17296-H05	GMP#06028	BOLD:AAB4345	BIN on BOLD	BIOUG17296-H05	579	15-Jul-2014	Lepidoptera	Noctuidae	Autographa	Kate Perez	BIN Taxonomy Match	July
GMTPZ	GMGMM	GMGMM093-14	Specimen on BOLD	BIOUG17296-H07	GMP#06028	BOLD:AAB4345	BIN on BOLD	BIOUG17296-H07	594	15-Jul-2014	Lepidoptera	Noctuidae	Autographa	Kate Perez	BIN Taxonomy Match	July
GMTPZ	GMGMM	GMGMM094-14	Specimen on BOLD	BIOUG17296-H08	GMP#06028	BOLD:AAB4345	BIN on BOLD	BIOUG17296-H08	588	15-Jul-2014	Lepidoptera	Noctuidae	Autographa	Kate Perez	BIN Taxonomy Match	July
GMTPZ	GMGMN	GMGMN085-14	Specimen on BOLD	BIOUG17381-C10	GMP#06029	BOLD:AAB4345	BIN on BOLD	BIOUG17381-C10	588	29-Jul-2014	Lepidoptera	Noctuidae	Autographa	Kate Perez	BIN Taxonomy Match	July
GMTPZ	GMGMN	GMGMN087-14	Specimen on BOLD	BIOUG17381-C12	GMP#06029	BOLD:AAB4345	BIN on BOLD	BIOUG17381-C12	588	29-Jul-2014	Lepidoptera	Noctuidae	Autographa	Kate Perez	BIN Taxonomy Match	July
GMTPZ	GMGMN	GMGMN101-14	Specimen on BOLD	BIOUG17381-E02	GMP#06029	BOLD:AAB4345	BIN on BOLD	BIOUG17381-E02	588	29-Jul-2014	Lepidoptera	Noctuidae	Autographa	Kate Perez	BIN Taxonomy Match	July
GMTPZ	GMGMN	GMGMN110-14	Specimen on BOLD	BIOUG17381-E11	GMP#06029	BOLD:AAB4345	BIN on BOLD	BIOUG17381-E11	588	29-Jul-2014	Lepidoptera	Noctuidae	Autographa	Kate Perez	BIN Taxonomy Match	July
GMTPZ	GMGMN	GMGMN111-14	Specimen on BOLD	BIOUG17381-E12	GMP#06029	BOLD:AAB4345	BIN on BOLD	BIOUG17381-E12	588	29-Jul-2014	Lepidoptera	Noctuidae	Autographa	Kate Perez	BIN Taxonomy Match	July
GMTPZ	GMGMN	GMGMN112-14	Specimen on BOLD	BIOUG17381-F01	GMP#06029	BOLD:AAB4345	BIN on BOLD	BIOUG17381-F01	588	29-Jul-2014	Lepidoptera	Noctuidae	Autographa	Kate Perez	BIN Taxonomy Match	July
GMTPZ	GMGMN	GMGMN115-14	Specimen on BOLD	BIOUG17381-F04	GMP#06029	BOLD:AAB4345	BIN on BOLD	BIOUG17381-F04	588	29-Jul-2014	Lepidoptera	Noctuidae	Autographa	Kate Perez	BIN Taxonomy Match	July
GMTPZ	GMGMN	GMGMN122-14	Specimen on BOLD	BIOUG17381-F11	GMP#06029	BOLD:AAB4345	BIN on BOLD	BIOUG17381-F11	588	29-Jul-2014	Lepidoptera	Noctuidae	Autographa	Kate Perez	BIN Taxonomy Match	July
GMTPZ	GMGMN	GMGMN123-14	Specimen on BOLD	BIOUG17381-F12	GMP#06029	BOLD:AAB4345	BIN on BOLD	BIOUG17381-F12	588	29-Jul-2014	Lepidoptera	Noctuidae	Autographa	Kate Perez	BIN Taxonomy Match	July
GMTPZ	GMGMN	GMGMN125-14	Specimen on BOLD	BIOUG17381-G02	GMP#06029	BOLD:AAB4345	BIN on BOLD	BIOUG17381-G02	588	29-Jul-2014	Lepidoptera	Noctuidae	Autographa	Kate Perez	BIN Taxonomy Match	July
GMTPZ	GMGMN	GMGMN126-14	Specimen on BOLD	BIOUG17381-G03	GMP#06029	BOLD:AAB4345	BIN on BOLD	BIOUG17381-G03	579	29-Jul-2014	Lepidoptera	Noctuidae	Autographa	Kate Perez	BIN Taxonomy Match	July
GMTPZ	GMGMN	GMGMN128-14	Specimen on BOLD	BIOUG17381-G05	GMP#06029	BOLD:AAB4345	BIN on BOLD	BIOUG17381-G05	588	29-Jul-2014	Lepidoptera	Noctuidae	Autographa	Kate Perez	BIN Taxonomy Match	July
GMTPZ	GMGMN	GMGMN131-14	Specimen on BOLD	BIOUG17381-G08	GMP#06029	BOLD:AAB4345	BIN on BOLD	BIOUG17381-G08	588	29-Jul-2014	Lepidoptera	Noctuidae	Autographa	Kate Perez	BIN Taxonomy Match	July
GMTPZ	GMGMN	GMGMN132-14	Specimen on BOLD	BIOUG17381-G09	GMP#06029	BOLD:AAB4345	BIN on BOLD	BIOUG17381-G09	579	29-Jul-2014	Lepidoptera	Noctuidae	Autographa	Kate Perez	BIN Taxonomy Match	July
GMTPZ	GMGMN	GMGMN133-14	Specimen on BOLD	BIOUG17381-G10	GMP#06029	BOLD:AAB4345	BIN on BOLD	BIOUG17381-G10	591	29-Jul-2014	Lepidoptera	Noctuidae	Autographa	Kate Perez	BIN Taxonomy Match	July
GMTPZ	GMGMN	GMGMN134-14	Specimen on BOLD	BIOUG17381-G11	GMP#06029	BOLD:AAB4345	BIN on BOLD	BIOUG17381-G11	588	29-Jul-2014	Lepidoptera	Noctuidae	Autographa	Kate Perez	BIN Taxonomy Match	July
GMTPZ	GMGMN	GMGMN135-14	Specimen on BOLD	BIOUG17381-G12	GMP#06029	BOLD:AAB4345	BIN on BOLD	BIOUG17381-G12	579	29-Jul-2014	Lepidoptera	Noctuidae	Autographa	Kate Perez	BIN Taxonomy Match	July
GMTPZ	GMGMN	GMGMN136-14	Specimen on BOLD	BIOUG17381-H01	GMP#06029	BOLD:AAB4345	BIN on BOLD	BIOUG17381-H01	588	29-Jul-2014	Lepidoptera	Noctuidae	Autographa	Kate Perez	BIN Taxonomy Match	July
GMTPZ	GMGMN	GMGMN139-14	Specimen on BOLD	BIOUG17381-H04	GMP#06029	BOLD:AAB4345	BIN on BOLD	BIOUG17381-H04	591	29-Jul-2014	Lepidoptera	Noctuidae	Autographa	Kate Perez	BIN Taxonomy Match	July
GMTPZ	GMGMN	GMGMN140-14	Specimen on BOLD	BIOUG17381-H05	GMP#06029	BOLD:AAB4345	BIN on BOLD	BIOUG17381-H05	588	29-Jul-2014	Lepidoptera	Noctuidae	Autographa	Kate Perez	BIN Taxonomy Match	July
GMTPZ	GMGMN	GMGMN142-14	Specimen on BOLD	BIOUG17381-H07	GMP#06029	BOLD:AAB4345	BIN on BOLD	BIOUG17381-H07	582	29-Jul-2014	Lepidoptera	Noctuidae	Autographa	Kate Perez	BIN Taxonomy Match	July
GMTPZ	GMGMN	GMGMN145-14	Specimen on BOLD	BIOUG17381-H10	GMP#06029	BOLD:AAB4345	BIN on BOLD	BIOUG17381-H10	588	29-Jul-2014	Lepidoptera	Noctuidae	Autographa	Kate Perez	BIN Taxonomy Match	July
GMTPZ	GMGMN	GMGMN242-14	Specimen on BOLD	BIOUG17383-A01	GMP#06029	BOLD:AAB4345	BIN on BOLD	BIOUG17383-A01	546	29-Jul-2014	Lepidoptera	Noctuidae	Autographa	Kate Perez	BIN Taxonomy Match	July
GMTPZ	GMGMN	GMGMN243-14	Specimen on BOLD	BIOUG17383-A02	GMP#06029	BOLD:AAB4345	BIN on BOLD	BIOUG17383-A02	567	29-Jul-2014	Lepidoptera	Noctuidae	Autographa	Kate Perez	BIN Taxonomy Match	July
GMTPZ	GMGMN	GMGMN244-14	Specimen on BOLD	BIOUG17383-A03	GMP#06029	BOLD:AAB4345	BIN on BOLD	BIOUG17383-A03	579	29-Jul-2014	Lepidoptera	Noctuidae	Autographa	Kate Perez	BIN Taxonomy Match	July
GMTPZ	GMGMN	GMGMN245-14	Specimen on BOLD	BIOUG17383-A04	GMP#06029	BOLD:AAB4345	BIN on BOLD	BIOUG17383-A04	567	29-Jul-2014	Lepidoptera	Noctuidae	Autographa	Kate Perez	BIN Taxonomy Match	July
GMTPZ	GMGMN	GMGMN246-14	Specimen on BOLD	BIOUG17383-A05	GMP#06029	BOLD:AAB4345	BIN on BOLD	BIOUG17383-A05	564	29-Jul-2014	Lepidoptera	Noctuidae	Autographa	Kate Perez	BIN Taxonomy Match	July
GMTPZ	GMGMN	GMGMN248-14	Specimen on BOLD	BIOUG17383-A07	GMP#06029	BOLD:AAB4345	BIN on BOLD	BIOUG17383-A07	564	29-Jul-2014	Lepidoptera	Noctuidae	Autographa	Kate Perez	BIN Taxonomy Match	July
GMTPZ	GMGMN	GMGMN250-14	Specimen on BOLD	BIOUG17383-A09	GMP#06029	BOLD:AAB4345	BIN on BOLD	BIOUG17383-A09	588	29-Jul-2014	Lepidoptera	Noctuidae	Autographa	Kate Perez	BIN Taxonomy Match	July
GMTPZ	GMGMN	GMGMN251-14	Specimen on BOLD	BIOUG17383-A10	GMP#06029	BOLD:AAB4345	BIN on BOLD	BIOUG17383-A10	579	29-Jul-2014	Lepidoptera	Noctuidae	Autographa	Kate Perez	BIN Taxonomy Match	July
GMTPZ	GMGMN	GMGMN252-14	Specimen on BOLD	BIOUG17383-A11	GMP#06029	BOLD:AAB4345	BIN on BOLD	BIOUG17383-A11	552	29-Jul-2014	Lepidoptera	Noctuidae	Autographa	Kate Perez	BIN Taxonomy Match	July
GMTPZ	GMGMN	GMGMN253-14	Specimen on BOLD	BIOUG17383-A12	GMP#06029	BOLD:AAB4345	BIN on BOLD	BIOUG17383-A12	558	29-Jul-2014	Lepidoptera	Noctuidae	Autographa	Kate Perez	BIN Taxonomy Match	July
GMTPZ	GMGMN	GMGMN254-14	Specimen on BOLD	BIOUG17383-B01	GMP#06029	BOLD:AAB4345	BIN on BOLD	BIOUG17383-B01	579	29-Jul-2014	Lepidoptera	Noctuidae	Autographa	Kate Perez	BIN Taxonomy Match	July
GMTPZ	GMGMN	GMGMN255-14	Specimen on BOLD	BIOUG17383-B02	GMP#06029	BOLD:AAB4345	BIN on BOLD	BIOUG17383-B02	543	29-Jul-2014	Lepidoptera	Noctuidae	Autographa	Kate Perez	BIN Taxonomy Match	July
GMTPZ	GMGMN	GMGMN256-14	Specimen on BOLD	BIOUG17383-B03	GMP#06029	BOLD:AAB4345	BIN on BOLD	BIOUG17383-B03	588	29-Jul-2014	Lepidoptera	Noctuidae	Autographa	Kate Perez	BIN Taxonomy Match	July
GMTPZ	GMGMN	GMGMN257-14	Specimen on BOLD	BIOUG17383-B04	GMP#06029	BOLD:AAB4345	BIN on BOLD	BIOUG17383-B04	588	29-Jul-2014	Lepidoptera	Noctuidae	Autographa	Kate Perez	BIN Taxonomy Match	July
GMTPZ	GMGMN	GMGMN258-14	Specimen on BOLD	BIOUG17383-B05	GMP#06029	BOLD:AAB4345	BIN on BOLD	BIOUG17383-B05	588	29-Jul-2014	Lepidoptera	Noctuidae	Autographa	Kate Perez	BIN Taxonomy Match	July
GMTPZ	GMGMN	GMGMN260-14	Specimen on BOLD	BIOUG17383-B07	GMP#06029	BOLD:AAB4345	BIN on BOLD	BIOUG17383-B07	588	29-Jul-2014	Lepidoptera	Noctuidae	Autographa	Kate Perez	BIN Taxonomy Match	July
GMTPZ	GMGMN	GMGMN261-14	Specimen on BOLD	BIOUG17383-B08	GMP#06029	BOLD:AAB4345	BIN on BOLD	BIOUG17383-B08	579	29-Jul-2014	Lepidoptera	Noctuidae	Autographa	Kate Perez	BIN Taxonomy Match	July
GMTPZ	GMGMN	GMGMN262-14	Specimen on BOLD	BIOUG17383-B09	GMP#06029	BOLD:AAB4345	BIN on BOLD	BIOUG17383-B09	587	29-Jul-2014	Lepidoptera	Noctuidae	Autographa	Kate Perez	BIN Taxonomy Match	July
GMTPZ	GMGMN	GMGMN263-14	Specimen on BOLD	BIOUG17383-B10	GMP#06029	BOLD:AAB4345	BIN on BOLD	BIOUG17383-B10	591	29-Jul-2014	Lepidoptera	Noctuidae	Autographa	Kate Perez	BIN Taxonomy Match	July
GMTPZ	GMGMN	GMGMN264-14	Specimen on BOLD	BIOUG17383-B11	GMP#06029	BOLD:AAB4345	BIN on BOLD	BIOUG17383-B11	543	29-Jul-2014	Lepidoptera	Noctuidae	Autographa	Kate Perez	BIN Taxonomy Match	July
GMTPZ	GMGMN	GMGMN266-14	Specimen on BOLD	BIOUG17383-C01	GMP#06029	BOLD:AAB4345	BIN on BOLD	BIOUG17383-C01	576	29-Jul-2014	Lepidoptera	Noctuidae	Autographa	Kate Perez	BIN Taxonomy Match	July
GMTPZ	GMGMK	GMGMK197-14	Specimen on BOLD	BIOUG17174-B11	GMP#06026	BOLD:AAB4833	BIN on BOLD	BIOUG17174-B11	576	17-Jun-2014	Lepidoptera	Noctuidae	Oligia	Kate Perez	BIN Taxonomy Match	June
GMTPZ	GMGMK	GMGMK339-14	Specimen on BOLD	BIOUG17175-F10	GMP#06026	BOLD:AAB4833	BIN on BOLD	BIOUG17175-F10	554	17-Jun-2014	Lepidoptera	Noctuidae	Oligia	Kate Perez	BIN Taxonomy Match	June
GMTPZ	GMGMK	GMGMK340-14	Specimen on BOLD	BIOUG17175-F11	GMP#06026	BOLD:AAB4833	BIN on BOLD	BIOUG17175-F11	564	17-Jun-2014	Lepidoptera	Noctuidae	Oligia	Kate Perez	BIN Taxonomy Match	June
GMTPZ	GMGMK	GMGMK341-14	Specimen on BOLD	BIOUG17175-F12	GMP#06026	BOLD:AAB4833	BIN on BOLD	BIOUG17175-F12	549	17-Jun-2014	Lepidoptera	Noctuidae	Oligia	Kate Perez	BIN Taxonomy Match	June
GMTPZ	GMGMA	GMGMA504-14	Specimen on BOLD	BIOUG16210-B10	GMP#06015	BOLD:AAB4864	BIN on BOLD	BIOUG16210-B10	566	25-Jul-2013	Lepidoptera	Hesperiidae	Ochlodes	Kate Perez	BIN Taxonomy Match	July
GMTPZ	GMGMA	GMGMA523-14	Specimen on BOLD	BIOUG16210-D05	GMP#06015	BOLD:AAB4864	BIN on BOLD	BIOUG16210-D05	554	25-Jul-2013	Lepidoptera	Hesperiidae	Ochlodes	Kate Perez	BIN Taxonomy Match	July
GMTPZ	GMGMA	GMGMA534-14	Specimen on BOLD	BIOUG16210-E04	GMP#06015	BOLD:AAB4864	BIN on BOLD	BIOUG16210-E04	554	25-Jul-2013	Lepidoptera	Hesperiidae	Ochlodes	Kate Perez	BIN Taxonomy Match	July
GMTPZ	GMGMA	GMGMA583-14	Specimen on BOLD	BIOUG16211-A06	GMP#06015	BOLD:AAB4864	BIN on BOLD	BIOUG16211-A06	610	25-Jul-2013	Lepidoptera	Hesperiidae	Ochlodes	Kate Perez	BIN Taxonomy Match	July
GMTPZ	GMGMC	GMGMC040-14	Specimen on BOLD	BIOUG16353-F01	GMP#06016	BOLD:AAB4864	BIN on BOLD	BIOUG16353-F01	588	08-Aug-2013	Lepidoptera	Hesperiidae	Ochlodes	Kate Perez	BIN Taxonomy Match	August
GMTPZ	GMGMK	GMGMK194-14	Specimen on BOLD	BIOUG17174-B08	GMP#06026	BOLD:AAB4864	BIN on BOLD	BIOUG17174-B08	555	17-Jun-2014	Lepidoptera	Hesperiidae	Ochlodes	Kate Perez	BIN Taxonomy Match	June
GMTPZ	GMGMK	GMGMK195-14	Specimen on BOLD	BIOUG17174-B09	GMP#06026	BOLD:AAB4864	BIN on BOLD	BIOUG17174-B09	588	17-Jun-2014	Lepidoptera	Hesperiidae	Ochlodes	Kate Perez	BIN Taxonomy Match	June
GMTPZ	GMGMK	GMGMK196-14	Specimen on BOLD	BIOUG17174-B10	GMP#06026	BOLD:AAB4864	BIN on BOLD	BIOUG17174-B10	588	17-Jun-2014	Lepidoptera	Hesperiidae	Ochlodes	Kate Perez	BIN Taxonomy Match	June
GMTPZ	GMGMK	GMGMK202-14	Specimen on BOLD	BIOUG17174-C04	GMP#06026	BOLD:AAB4864	BIN on BOLD	BIOUG17174-C04	551	17-Jun-2014	Lepidoptera	Hesperiidae	Ochlodes	Kate Perez	BIN Taxonomy Match	June
GMTPZ	GMGML	GMGML044-14	Specimen on BOLD	BIOUG17228-D04	GMP#06027	BOLD:AAB4864	BIN on BOLD	BIOUG17228-D04	588	01-Jul-2014	Lepidoptera	Hesperiidae	Ochlodes	Kate Perez	BIN Taxonomy Match	July
GMTPZ	GMGML	GMGML054-14	Specimen on BOLD	BIOUG17228-E02	GMP#06027	BOLD:AAB4864	BIN on BOLD	BIOUG17228-E02	588	01-Jul-2014	Lepidoptera	Hesperiidae	Ochlodes	Kate Perez	BIN Taxonomy Match	July
GMTPZ	GMGML	GMGML058-14	Specimen on BOLD	BIOUG17228-E06	GMP#06027	BOLD:AAB4864	BIN on BOLD	BIOUG17228-E06	555	01-Jul-2014	Lepidoptera	Hesperiidae	Ochlodes	Kate Perez	BIN Taxonomy Match	July
GMTPZ	GMGMM	GMGMM092-14	Specimen on BOLD	BIOUG17296-H06	GMP#06028	BOLD:AAB4864	BIN on BOLD	BIOUG17296-H06	582	15-Jul-2014	Lepidoptera	Hesperiidae	Ochlodes	Kate Perez	BIN Taxonomy Match	July
GMTPZ	GMGMN	GMGMN265-14	Specimen on BOLD	BIOUG17383-B12	GMP#06029	BOLD:AAB4864	BIN on BOLD	BIOUG17383-B12	582	29-Jul-2014	Lepidoptera	Hesperiidae	Ochlodes	Kate Perez	BIN Taxonomy Match	July
GMTPZ	GMGMK	GMGMK906-14	Specimen on BOLD	BIOUG17181-C01	GMP#06026	BOLD:AAB5543	BIN on BOLD	BIOUG17181-C01	589	17-Jun-2014	Lepidoptera	Coleophoridae	Coleophora	Kate Perez	BIN Taxonomy Match	June
GMTPZ	GMGMA	GMGMA530-14	Specimen on BOLD	BIOUG16210-D12	GMP#06015	BOLD:AAB5839	BIN on BOLD	BIOUG16210-D12	524	25-Jul-2013	Lepidoptera	Tortricidae	Archips	Kate Perez	BIN Taxonomy Match	July
GMTPZ	GMGMD	GMGMD051-14	Specimen on BOLD	BIOUG16357-H04	GMP#06018	BOLD:AAB5999	BIN on BOLD	BIOUG16357-H04	579	16-Sep-2013	Lepidoptera	Lycaenidae	Thecla	Kate Perez	BIN Taxonomy Match	September
GMTPZ	GMGMA	GMGMA1536-14	Specimen on BOLD	BIOUG16267-A09	GMP#06015	BOLD:AAB6833	BIN on BOLD	BIOUG16267-A09	588	25-Jul-2013	Lepidoptera	Erebidae	Eilema	Kate Perez	BIN Taxonomy Match	July
GMTPZ	GMGML	GMGML055-14	Specimen on BOLD	BIOUG17228-E03	GMP#06027	BOLD:AAB6833	BIN on BOLD	BIOUG17228-E03	582	01-Jul-2014	Lepidoptera	Erebidae	Eilema	Kate Perez	BIN Taxonomy Match	July
GMTPZ	GMGMI	GMGMI222-14	Specimen on BOLD	BIOUG17086-C03	GMP#06024	BOLD:AAB9164	BIN on BOLD	BIOUG17086-C03	588	16-May-2014	Lepidoptera	Noctuidae	Agrotis	Kate Perez	BIN Taxonomy Match	May
GMTPZ	GMGMA	GMGMA1062-14	Specimen on BOLD	BIOUG16216-A10	GMP#06015	BOLD:AAB9404	BIN on BOLD	BIOUG16216-A10	591	25-Jul-2013	Lepidoptera	Tortricidae	Archips	Kate Perez	BIN Taxonomy Match	July
GMTPZ	GMGMA	GMGMA580-14	Specimen on BOLD	BIOUG16211-A03	GMP#06015	BOLD:AAB9404	BIN on BOLD	BIOUG16211-A03	577	25-Jul-2013	Lepidoptera	Tortricidae	Archips	Kate Perez	BIN Taxonomy Match	July
GMTPZ	GMGMK	GMGMK1084-14	Specimen on BOLD	BIOUG17222-B01	GMP#06026	BOLD:AAB9404	BIN on BOLD	BIOUG17222-B01	591	17-Jun-2014	Lepidoptera	Tortricidae	Archips	Kate Perez	BIN Taxonomy Match	June
GMTPZ	GMGMM	GMGMM1270-14	Specimen on BOLD	BIOUG17377-B07	GMP#06028	BOLD:AAB9664	BIN on BOLD	BIOUG17377-B07	576	15-Jul-2014	Lepidoptera	Nepticulidae	Ectoedemia	Kate Perez	BIN Taxonomy Match	July
GMTPZ	GMGMK	GMGMK1083-14	Specimen on BOLD	BIOUG17222-A12	GMP#06026	BOLD:AAB9919	BIN on BOLD	BIOUG17222-A12	564	17-Jun-2014	Lepidoptera	Tortricidae	Agapeta	Kate Perez	BIN Taxonomy Match	June
GMTPZ	GMGMI	GMGMI1053-14	Specimen on BOLD	BIOUG17118-A03	GMP#06024	BOLD:AAC0677	BIN on BOLD	BIOUG17118-A03	588	16-May-2014	Lepidoptera	Sesiidae	Chamaesphecia	Kate Perez	BIN Taxonomy Match	May
GMTPZ	GMGML	GMGML1020-14	Specimen on BOLD	BIOUG17268-C01	GMP#06027	BOLD:AAC0677	BIN on BOLD	BIOUG17268-C01	582	01-Jul-2014	Lepidoptera	Sesiidae	Chamaesphecia	Kate Perez	BIN Taxonomy Match	July
GMTPZ	GMGML	GMGML1021-14	Specimen on BOLD	BIOUG17268-C02	GMP#06027	BOLD:AAC0677	BIN on BOLD	BIOUG17268-C02	588	01-Jul-2014	Lepidoptera	Sesiidae	Chamaesphecia	Kate Perez	BIN Taxonomy Match	July
GMTPZ	GMGMM	GMGMM1267-14	Specimen on BOLD	BIOUG17377-B04	GMP#06028	BOLD:AAC0715	BIN on BOLD	BIOUG17377-B04	576	15-Jul-2014	Lepidoptera	Tortricidae	Epiblema	Kate Perez	BIN Taxonomy Match	July
GMTPZ	GMGMI	GMGMI221-14	Specimen on BOLD	BIOUG17086-C02	GMP#06024	BOLD:AAC2189	BIN on BOLD	BIOUG17086-C02	564	16-May-2014	Lepidoptera	Geometridae	Melanthia	Kate Perez	BIN Taxonomy Match	May
GMTPZ	GMGMJ	GMGMJ044-14	Specimen on BOLD	BIOUG17068-B11	GMP#06025	BOLD:AAC2189	BIN on BOLD	BIOUG17068-B11	579	02-Jun-2014	Lepidoptera	Geometridae	Melanthia	Kate Perez	BIN Taxonomy Match	June
GMTPZ	GMGMJ	GMGMJ048-14	Specimen on BOLD	BIOUG17068-C03	GMP#06025	BOLD:AAC2189	BIN on BOLD	BIOUG17068-C03	567	02-Jun-2014	Lepidoptera	Geometridae	Melanthia	Kate Perez	BIN Taxonomy Match	June
GMTPZ	GMGMK	GMGMK207-14	Specimen on BOLD	BIOUG17174-C09	GMP#06026	BOLD:AAC2189	BIN on BOLD	BIOUG17174-C09	531	17-Jun-2014	Lepidoptera	Geometridae	Melanthia	Kate Perez	BIN Taxonomy Match	June
GMTPZ	GMGMK	GMGMK221-14	Specimen on BOLD	BIOUG17174-D11	GMP#06026	BOLD:AAC2189	BIN on BOLD	BIOUG17174-D11	588	17-Jun-2014	Lepidoptera	Geometridae	Melanthia	Kate Perez	BIN Taxonomy Match	June
GMTPZ	GMGMI	GMGMI907-14	Specimen on BOLD	BIOUG17116-D11	GMP#06024	BOLD:AAC3246	BIN on BOLD	BIOUG17116-D11	542	16-May-2014	Lepidoptera	Tortricidae	Notocelia	Kate Perez	BIN Taxonomy Match	May
GMTPZ	GMGMD	GMGMD045-14	Specimen on BOLD	BIOUG16357-G10	GMP#06018	BOLD:AAC3884	BIN on BOLD	BIOUG16357-G10	579	16-Sep-2013	Lepidoptera	Noctuidae	Agrotis	Kate Perez	BIN Taxonomy Match	September
GMTPZ	GMGMA	GMGMA1156-14	Specimen on BOLD	BIOUG16217-A09	GMP#06015	BOLD:AAC3993	BIN on BOLD	BIOUG16217-A09	579	25-Jul-2013	Lepidoptera	Coleophoridae	Coleophora	Kate Perez	BIN Taxonomy Match	July
GMTPZ	GMGMM	GMGMM1306-14	Specimen on BOLD	BIOUG17377-E07	GMP#06028	BOLD:AAC3993	BIN on BOLD	BIOUG17377-E07	564	15-Jul-2014	Lepidoptera	Coleophoridae	Coleophora	Kate Perez	BIN Taxonomy Match	July
GMTPZ	GMGMM	GMGMM1341-14	Specimen on BOLD	BIOUG17377-H06	GMP#06028	BOLD:AAC3993	BIN on BOLD	BIOUG17377-H06	564	15-Jul-2014	Lepidoptera	Coleophoridae	Coleophora	Kate Perez	BIN Taxonomy Match	July
GMTPZ	GMGMM	GMGMM1338-14	Specimen on BOLD	BIOUG17377-H03	GMP#06028	BOLD:AAC4531	BIN on BOLD	BIOUG17377-H03	573	15-Jul-2014	Lepidoptera	Coleophoridae	Coleophora	Kate Perez	BIN Taxonomy Match	July
GMTPZ	GMGMD	GMGMD351-14	Specimen on BOLD	BIOUG16609-A05	GMP#06018	BOLD:AAC4757	BIN on BOLD	BIOUG16609-A05	591	16-Sep-2013	Lepidoptera	Geometridae	Catarhoe	Kate Perez	BIN Taxonomy Match	September
GMTPZ	GMGML	GMGML050-14	Specimen on BOLD	BIOUG17228-D10	GMP#06027	BOLD:AAC4757	BIN on BOLD	BIOUG17228-D10	552	01-Jul-2014	Lepidoptera	Geometridae	Catarhoe	Kate Perez	BIN Taxonomy Match	July
GMTPZ	GMGMK	GMGMK1056-14	Specimen on BOLD	BIOUG17182-G08	GMP#06026	BOLD:AAC8582	BIN on BOLD	BIOUG17182-G08	553	17-Jun-2014	Lepidoptera	Choreutidae	Anthophila	Kate Perez	BIN Taxonomy Match	June
GMTPZ	GMGMN	GMGMN816-14	Specimen on BOLD	BIOUG17441-F09	GMP#06029	BOLD:AAC8582	BIN on BOLD	BIOUG17441-F09	619	29-Jul-2014	Lepidoptera	Choreutidae	Anthophila	Kate Perez	BIN Taxonomy Match	July
GMTPZ	GMGMI	GMGMI909-14	Specimen on BOLD	BIOUG17116-E01	GMP#06024	BOLD:AAD0577	BIN on BOLD	BIOUG17116-E01	540	16-May-2014	Lepidoptera	Tortricidae	Hedya	Kate Perez	BIN Taxonomy Match	May
GMTPZ	GMGMJ	GMGMJ1339-14	Specimen on BOLD	BIOUG17098-A02	GMP#06025	BOLD:AAD0577	BIN on BOLD	BIOUG17098-A02	570	02-Jun-2014	Lepidoptera	Tortricidae	Hedya	Kate Perez	BIN Taxonomy Match	June
GMTPZ	GMGMJ	GMGMJ1340-14	Specimen on BOLD	BIOUG17098-A03	GMP#06025	BOLD:AAD0577	BIN on BOLD	BIOUG17098-A03	576	02-Jun-2014	Lepidoptera	Tortricidae	Hedya	Kate Perez	BIN Taxonomy Match	June
GMTPZ	GMGMJ	GMGMJ1345-14	Specimen on BOLD	BIOUG17098-A08	GMP#06025	BOLD:AAD0577	BIN on BOLD	BIOUG17098-A08	591	02-Jun-2014	Lepidoptera	Tortricidae	Hedya	Kate Perez	BIN Taxonomy Match	June
GMTPZ	GMGMJ	GMGMJ1362-14	Specimen on BOLD	BIOUG17098-C01	GMP#06025	BOLD:AAD0577	BIN on BOLD	BIOUG17098-C01	575	02-Jun-2014	Lepidoptera	Tortricidae	Hedya	Kate Perez	BIN Taxonomy Match	June
GMTPZ	GMGMJ	GMGMJ904-14	Specimen on BOLD	BIOUG17093-D06	GMP#06025	BOLD:AAD0577	BIN on BOLD	BIOUG17093-D06	576	02-Jun-2014	Lepidoptera	Tortricidae	Hedya	Kate Perez	BIN Taxonomy Match	June
GMTPZ	GMGMA	GMGMA483-14	Specimen on BOLD	BIOUG16210-A01	GMP#06015	BOLD:AAD2274	BIN on BOLD	BIOUG16210-A01	612	25-Jul-2013	Lepidoptera	Noctuidae	Apamea	Kate Perez	BIN Taxonomy Match	July
GMTPZ	GMGML	GMGML014-14	Specimen on BOLD	BIOUG17228-A10	GMP#06027	BOLD:AAD2274	BIN on BOLD	BIOUG17228-A10	555	01-Jul-2014	Lepidoptera	Noctuidae	Apamea	Kate Perez	BIN Taxonomy Match	July
GMTPZ	GMGML	GMGML053-14	Specimen on BOLD	BIOUG17228-E01	GMP#06027	BOLD:AAD2274	BIN on BOLD	BIOUG17228-E01	564	01-Jul-2014	Lepidoptera	Noctuidae	Apamea	Kate Perez	BIN Taxonomy Match	July
GMTPZ	GMGMM	GMGMM066-14	Specimen on BOLD	BIOUG17296-F04	GMP#06028	BOLD:AAD2274	BIN on BOLD	BIOUG17296-F04	582	15-Jul-2014	Lepidoptera	Noctuidae	Apamea	Kate Perez	BIN Taxonomy Match	July
GMTPZ	GMGMB	GMGMB1288-14	Specimen on BOLD	BIOUG16351-C04	GMP#06017	BOLD:AAD3189	BIN on BOLD	BIOUG16351-C04	582	26-Aug-2013	Lepidoptera	Tortricidae	Dichrorampha	Kate Perez	BIN Taxonomy Match	August
GMTPZ	GMGMD	GMGMD047-14	Specimen on BOLD	BIOUG16357-G12	GMP#06018	BOLD:AAD5882	BIN on BOLD	BIOUG16357-G12	591	16-Sep-2013	Lepidoptera	Noctuidae	Mythimna	Kate Perez	BIN Taxonomy Match	September
GMTPZ	GMGMD	GMGMD057-14	Specimen on BOLD	BIOUG16357-H10	GMP#06018	BOLD:AAD5882	BIN on BOLD	BIOUG16357-H10	591	16-Sep-2013	Lepidoptera	Noctuidae	Mythimna	Kate Perez	BIN Taxonomy Match	September
GMTPZ	GMGMJ	GMGMJ320-14	Specimen on BOLD	BIOUG17071-B02	GMP#06025	BOLD:AAD5882	BIN on BOLD	BIOUG17071-B02	591	02-Jun-2014	Lepidoptera	Noctuidae	Mythimna	Kate Perez	BIN Taxonomy Match	June
GMTPZ	GMGMK	GMGMK204-14	Specimen on BOLD	BIOUG17174-C06	GMP#06026	BOLD:AAD5882	BIN on BOLD	BIOUG17174-C06	567	17-Jun-2014	Lepidoptera	Noctuidae	Mythimna	Kate Perez	BIN Taxonomy Match	June
GMTPZ	GMGMK	GMGMK205-14	Specimen on BOLD	BIOUG17174-C07	GMP#06026	BOLD:AAD5882	BIN on BOLD	BIOUG17174-C07	582	17-Jun-2014	Lepidoptera	Noctuidae	Mythimna	Kate Perez	BIN Taxonomy Match	June
GMTPZ	GMGMK	GMGMK206-14	Specimen on BOLD	BIOUG17174-C08	GMP#06026	BOLD:AAD5882	BIN on BOLD	BIOUG17174-C08	577	17-Jun-2014	Lepidoptera	Noctuidae	Mythimna	Kate Perez	BIN Taxonomy Match	June
GMTPZ	GMGMK	GMGMK215-14	Specimen on BOLD	BIOUG17174-D05	GMP#06026	BOLD:AAD5882	BIN on BOLD	BIOUG17174-D05	576	17-Jun-2014	Lepidoptera	Noctuidae	Mythimna	Kate Perez	BIN Taxonomy Match	June
GMTPZ	GMGMK	GMGMK218-14	Specimen on BOLD	BIOUG17174-D08	GMP#06026	BOLD:AAD5882	BIN on BOLD	BIOUG17174-D08	513	17-Jun-2014	Lepidoptera	Noctuidae	Mythimna	Kate Perez	BIN Taxonomy Match	June
GMTPZ	GMGML	GMGML039-14	Specimen on BOLD	BIOUG17228-C11	GMP#06027	BOLD:AAD5882	BIN on BOLD	BIOUG17228-C11	528	01-Jul-2014	Lepidoptera	Noctuidae	Mythimna	Kate Perez	BIN Taxonomy Match	July
GMTPZ	GMGML	GMGML040-14	Specimen on BOLD	BIOUG17228-C12	GMP#06027	BOLD:AAD5882	BIN on BOLD	BIOUG17228-C12	513	01-Jul-2014	Lepidoptera	Noctuidae	Mythimna	Kate Perez	BIN Taxonomy Match	July
GMTPZ	GMGMM	GMGMM1307-14	Specimen on BOLD	BIOUG17377-E08	GMP#06028	BOLD:AAD6889	BIN on BOLD	BIOUG17377-E08	576	15-Jul-2014	Lepidoptera	Depressariidae	Agonopterix	Kate Perez	BIN Taxonomy Match	July
GMTPZ	GMGMM	GMGMM989-14	Specimen on BOLD	BIOUG17374-B11	GMP#06028	BOLD:AAD6889	BIN on BOLD	BIOUG17374-B11	579	15-Jul-2014	Lepidoptera	Depressariidae	Agonopterix	Kate Perez	BIN Taxonomy Match	July
GMTPZ	GMGMA	GMGMA1159-14	Specimen on BOLD	BIOUG16217-A12	GMP#06015	BOLD:AAD6975	BIN on BOLD	BIOUG16217-A12	552	25-Jul-2013	Lepidoptera	Yponomeutidae	Paraswammerdamia	Kate Perez	BIN Taxonomy Match	July
GMTPZ	GMGML	GMGML1016-14	Specimen on BOLD	BIOUG17268-B09	GMP#06027	BOLD:AAD6975	BIN on BOLD	BIOUG17268-B09	588	01-Jul-2014	Lepidoptera	Yponomeutidae	Paraswammerdamia	Kate Perez	BIN Taxonomy Match	July
GMTPZ	GMGML	GMGML1282-14	Specimen on BOLD	BIOUG17270-A02	GMP#06027	BOLD:AAD6975	BIN on BOLD	BIOUG17270-A02	579	01-Jul-2014	Lepidoptera	Yponomeutidae	Paraswammerdamia	Kate Perez	BIN Taxonomy Match	July
GMTPZ	GMGML	GMGML1286-14	Specimen on BOLD	BIOUG17270-A06	GMP#06027	BOLD:AAD6975	BIN on BOLD	BIOUG17270-A06	576	01-Jul-2014	Lepidoptera	Yponomeutidae	Paraswammerdamia	Kate Perez	BIN Taxonomy Match	July
GMTPZ	GMGMM	GMGMM1279-14	Specimen on BOLD	BIOUG17377-C04	GMP#06028	BOLD:AAD6975	BIN on BOLD	BIOUG17377-C04	585	15-Jul-2014	Lepidoptera	Yponomeutidae	Paraswammerdamia	Kate Perez	BIN Taxonomy Match	July
GMTPZ	GMGMM	GMGMM1284-14	Specimen on BOLD	BIOUG17377-C09	GMP#06028	BOLD:AAD6975	BIN on BOLD	BIOUG17377-C09	576	15-Jul-2014	Lepidoptera	Yponomeutidae	Paraswammerdamia	Kate Perez	BIN Taxonomy Match	July
GMTPZ	GMGMM	GMGMM1287-14	Specimen on BOLD	BIOUG17377-C12	GMP#06028	BOLD:AAD6975	BIN on BOLD	BIOUG17377-C12	552	15-Jul-2014	Lepidoptera	Yponomeutidae	Paraswammerdamia	Kate Perez	BIN Taxonomy Match	July
GMTPZ	GMGMM	GMGMM1317-14	Specimen on BOLD	BIOUG17377-F06	GMP#06028	BOLD:AAD6975	BIN on BOLD	BIOUG17377-F06	576	15-Jul-2014	Lepidoptera	Yponomeutidae	Paraswammerdamia	Kate Perez	BIN Taxonomy Match	July
GMTPZ	GMGMM	GMGMM1337-14	Specimen on BOLD	BIOUG17377-H02	GMP#06028	BOLD:AAD6975	BIN on BOLD	BIOUG17377-H02	576	15-Jul-2014	Lepidoptera	Yponomeutidae	Paraswammerdamia	Kate Perez	BIN Taxonomy Match	July
GMTPZ	GMGMM	GMGMM1339-14	Specimen on BOLD	BIOUG17377-H04	GMP#06028	BOLD:AAD6975	BIN on BOLD	BIOUG17377-H04	576	15-Jul-2014	Lepidoptera	Yponomeutidae	Paraswammerdamia	Kate Perez	BIN Taxonomy Match	July
GMTPZ	GMGMK	GMGMK920-14	Specimen on BOLD	BIOUG17181-D03	GMP#06026	BOLD:AAD9304	BIN on BOLD	BIOUG17181-D03	579	17-Jun-2014	Lepidoptera	Coleophoridae	Coleophora	Kate Perez	BIN Taxonomy Match	June
GMTPZ	GMGML	GMGML1025-14	Specimen on BOLD	BIOUG17268-C06	GMP#06027	BOLD:AAD9985	BIN on BOLD	BIOUG17268-C06	591	01-Jul-2014	Lepidoptera	Elachistidae	Elachista	Kate Perez	BIN Taxonomy Match	July
GMTPE	GMGRE	GMGRE2866-13	Specimen on BOLD	BIOUG06046-F03	bayw.9	BOLD:AAE5517	BIN on BOLD	BIOUG06046-F03	575	04-Jul-2012	Lepidoptera	Tineidae	Infurcitinea	Kate Perez	BIN Taxonomy Match	July
GMTPZ	GMGMK	GMGMK1043-14	Specimen on BOLD	BIOUG17182-F07	GMP#06026	BOLD:AAE5807	BIN on BOLD	BIOUG17182-F07	600	17-Jun-2014	Lepidoptera	Tortricidae	Isotrias	Kate Perez	BIN Taxonomy Match	June
GMTPZ	GMGMK	GMGMK1044-14	Specimen on BOLD	BIOUG17182-F08	GMP#06026	BOLD:AAE5807	BIN on BOLD	BIOUG17182-F08	626	17-Jun-2014	Lepidoptera	Tortricidae	Isotrias	Kate Perez	BIN Taxonomy Match	June
GMTPZ	GMGMK	GMGMK926-14	Specimen on BOLD	BIOUG17181-D09	GMP#06026	BOLD:AAE5807	BIN on BOLD	BIOUG17181-D09	604	17-Jun-2014	Lepidoptera	Tortricidae	Isotrias	Kate Perez	BIN Taxonomy Match	June
GMTPZ	GMGMD	GMGMD1029-14	Specimen on BOLD	BIOUG16616-B06	GMP#06018	BOLD:AAE9051	BIN on BOLD	BIOUG16616-B06	576	16-Sep-2013	Lepidoptera	Pterophoridae	Hellinsia	Kate Perez	BIN Taxonomy Match	September
GMTPZ	GMGMK	GMGMK888-14	Specimen on BOLD	BIOUG17181-A07	GMP#06026	BOLD:AAE9855	BIN on BOLD	BIOUG17181-A07	611	17-Jun-2014	Lepidoptera	Gelechiidae	Teleiodes	Kate Perez	BIN Taxonomy Match	June
GMTPZ	GMGMK	GMGMK899-14	Specimen on BOLD	BIOUG17181-B06	GMP#06026	BOLD:AAE9855	BIN on BOLD	BIOUG17181-B06	610	17-Jun-2014	Lepidoptera	Gelechiidae	Teleiodes	Kate Perez	BIN Taxonomy Match	June
GMTPZ	GMGML	GMGML1005-14	Specimen on BOLD	BIOUG17268-A10	GMP#06027	BOLD:AAE9855	BIN on BOLD	BIOUG17268-A10	588	01-Jul-2014	Lepidoptera	Gelechiidae	Teleiodes	Kate Perez	BIN Taxonomy Match	July
GMTPZ	GMGML	GMGML1288-14	Specimen on BOLD	BIOUG17270-A08	GMP#06027	BOLD:AAF0269	BIN on BOLD	BIOUG17270-A08	582	01-Jul-2014	Lepidoptera	Tortricidae	Endothenia	Kate Perez	BIN Taxonomy Match	July
GMTPZ	GMGMM	GMGMM1268-14	Specimen on BOLD	BIOUG17377-B05	GMP#06028	BOLD:AAF0377	BIN on BOLD	BIOUG17377-B05	579	15-Jul-2014	Lepidoptera	Elachistidae	Blastodacna	Kate Perez	BIN Taxonomy Match	July
GMTPZ	GMGMB	GMGMB411-14	Specimen on BOLD	BIOUG16272-A06	GMP#06017	BOLD:AAF0752	BIN on BOLD	BIOUG16272-A06	591	26-Aug-2013	Lepidoptera	Noctuidae	Xestia	Kate Perez	BIN Taxonomy Match	August
GMTPZ	GMGMN	GMGMN259-14	Specimen on BOLD	BIOUG17383-B06	GMP#06029	BOLD:AAF0752	BIN on BOLD	BIOUG17383-B06	591	29-Jul-2014	Lepidoptera	Noctuidae	Xestia	Kate Perez	BIN Taxonomy Match	July
GMTPZ	GMGMD	GMGMD348-14	Specimen on BOLD	BIOUG16609-A02	GMP#06018	BOLD:AAF1597	BIN on BOLD	BIOUG16609-A02	582	16-Sep-2013	Lepidoptera	Geometridae	0	Kate Perez	BOLD ID Engine Manual	September
GMTPZ	GMGML	GMGML047-14	Specimen on BOLD	BIOUG17228-D07	GMP#06027	BOLD:AAG5877	BIN on BOLD	BIOUG17228-D07	553	01-Jul-2014	Lepidoptera	0	0	Kate Perez	BOLD ID Engine Manual	July
GMTPZ	GMGML	GMGML064-14	Specimen on BOLD	BIOUG17228-E12	GMP#06027	BOLD:AAG5877	BIN on BOLD	BIOUG17228-E12	528	01-Jul-2014	Lepidoptera	0	0	Kate Perez	BOLD ID Engine Manual	July
GMTPZ	GMGMB	GMGMB009-14	Specimen on BOLD	BIOUG16267-B12	GMP#06017	BOLD:AAQ1018	BIN on BOLD	BIOUG16267-B12	591	26-Aug-2013	Lepidoptera	Crambidae	Udea	Kate Perez	BIN Taxonomy Match	August
GMTPZ	GMGMC	GMGMC1420-14	Specimen on BOLD	BIOUG16528-G01	GMP#06016	BOLD:AAS0375	BIN on BOLD	BIOUG16528-G01	632	08-Aug-2013	Lepidoptera	Coleophoridae	Coleophora	Kate Perez	BIN Taxonomy Match	August
GMTPZ	GMGMI	GMGMI216-14	Specimen on BOLD	BIOUG17086-B09	GMP#06024	BOLD:ABY7043	BIN on BOLD	BIOUG17086-B09	591	16-May-2014	Lepidoptera	Nymphalidae	Polygonia	Kate Perez	BIN Taxonomy Match	May
GMTPZ	GMGMJ	GMGMJ031-14	Specimen on BOLD	BIOUG17068-A10	GMP#06025	BOLD:ABY7043	BIN on BOLD	BIOUG17068-A10	579	02-Jun-2014	Lepidoptera	Nymphalidae	Polygonia	Kate Perez	BIN Taxonomy Match	June
GMTPZ	GMGMK	GMGMK178-14	Specimen on BOLD	BIOUG17174-A04	GMP#06026	BOLD:ABY7043	BIN on BOLD	BIOUG17174-A04	564	17-Jun-2014	Lepidoptera	Nymphalidae	Polygonia	Kate Perez	BIN Taxonomy Match	June
GMTPZ	GMGMK	GMGMK179-14	Specimen on BOLD	BIOUG17174-A05	GMP#06026	BOLD:ABY7043	BIN on BOLD	BIOUG17174-A05	549	17-Jun-2014	Lepidoptera	Nymphalidae	Polygonia	Kate Perez	BIN Taxonomy Match	June
GMTPZ	GMGML	GMGML024-14	Specimen on BOLD	BIOUG17228-B08	GMP#06027	BOLD:ABY7043	BIN on BOLD	BIOUG17228-B08	540	01-Jul-2014	Lepidoptera	Nymphalidae	Polygonia	Kate Perez	BIN Taxonomy Match	July
GMTPZ	GMGMC	GMGMC025-14	Specimen on BOLD	BIOUG16353-D10	GMP#06016	BOLD:ABZ3039	BIN on BOLD	BIOUG16353-D10	588	08-Aug-2013	Lepidoptera	Pieridae	Colias	Kate Perez	BIN Taxonomy Match	August
GMTPZ	GMGMD	GMGMD005-14	Specimen on BOLD	BIOUG16357-D06	GMP#06018	BOLD:ABZ3039	BIN on BOLD	BIOUG16357-D06	588	16-Sep-2013	Lepidoptera	Pieridae	Colias	Kate Perez	BIN Taxonomy Match	September
GMTPZ	GMGMB	GMGMB1293-14	Specimen on BOLD	BIOUG16351-C09	GMP#06017	BOLD:ACE3007	BIN on BOLD	BIOUG16351-C09	555	26-Aug-2013	Lepidoptera	Tortricidae	Acleris	Kate Perez	BIN Taxonomy Match	August
GMTPZ	GMGMD	GMGMD1023-14	Specimen on BOLD	BIOUG16616-A12	GMP#06018	BOLD:ACE3007	BIN on BOLD	BIOUG16616-A12	545	16-Sep-2013	Lepidoptera	Tortricidae	Acleris	Kate Perez	BIN Taxonomy Match	September
GMTPZ	GMGMD	GMGMD364-14	Specimen on BOLD	BIOUG16609-B06	GMP#06018	BOLD:ACE3007	BIN on BOLD	BIOUG16609-B06	579	16-Sep-2013	Lepidoptera	Tortricidae	Acleris	Kate Perez	BIN Taxonomy Match	September
GMTPZ	GMGMM	GMGMM1266-14	Specimen on BOLD	BIOUG17377-B03	GMP#06028	BOLD:ACE3007	BIN on BOLD	BIOUG17377-B03	584	15-Jul-2014	Lepidoptera	Tortricidae	Acleris	Kate Perez	BIN Taxonomy Match	July
GMTPZ	GMGMK	GMGMK237-14	Specimen on BOLD	BIOUG17174-F03	GMP#06026	BOLD:ACE6053	BIN on BOLD	BIOUG17174-F03	576	17-Jun-2014	Lepidoptera	Geometridae	Ectropis	Kate Perez	BIN Taxonomy Match	June
GMTPZ	GMGML	GMGML041-14	Specimen on BOLD	BIOUG17228-D01	GMP#06027	BOLD:ACF2774	BIN on BOLD	BIOUG17228-D01	564	01-Jul-2014	Lepidoptera	Nymphalidae	Aphantopus	Kate Perez	BIN Taxonomy Match	July
GMTPZ	GMGMK	GMGMK907-14	Specimen on BOLD	BIOUG17181-C02	GMP#06026	BOLD:ACR2133	BIN on BOLD	BIOUG17181-C02	658	17-Jun-2014	Lepidoptera	Tortricidae	Acleris	Kate Perez	BOLD ID Engine Manual	June
GMTPZ	GMGMK	GMGMK882-14	Specimen on BOLD	BIOUG17181-A01	GMP#06026	BOLD:ACR2402	BIN on BOLD	BIOUG17181-A01	658	17-Jun-2014	Lepidoptera	Adelidae	Nemophora	Kate Perez	BOLD ID Engine Manual	June
GMTPZ	GMGMK	GMGMK898-14	Specimen on BOLD	BIOUG17181-B05	GMP#06026	BOLD:ACR2402	BIN on BOLD	BIOUG17181-B05	658	17-Jun-2014	Lepidoptera	Adelidae	Nemophora	Kate Perez	BOLD ID Engine Manual	June
GMTPZ	GMGMK	GMGMK924-14	Specimen on BOLD	BIOUG17181-D07	GMP#06026	BOLD:ACR2402	BIN on BOLD	BIOUG17181-D07	631	17-Jun-2014	Lepidoptera	Adelidae	Nemophora	Kate Perez	BOLD ID Engine Manual	June
GMTPZ	GMGMB	GMGMB297-14	Specimen on BOLD	BIOUG16270-G10	GMP#06017	BOLD:ACR3738	BIN on BOLD	BIOUG16270-G10	594	26-Aug-2013	Lepidoptera	Gracillariidae	Phyllonorycter	Kate Perez	BIN Taxonomy Match	August
GMTPZ	GMGMB	GMGMB298-14	Specimen on BOLD	BIOUG16270-G11	GMP#06017	BOLD:ACR3738	BIN on BOLD	BIOUG16270-G11	585	26-Aug-2013	Lepidoptera	Gracillariidae	Phyllonorycter	Kate Perez	BIN Taxonomy Match	August
GMTPZ	GMGMC	GMGMC1417-14	Specimen on BOLD	BIOUG16528-F10	GMP#06016	BOLD:ACR3738	BIN on BOLD	BIOUG16528-F10	576	08-Aug-2013	Lepidoptera	Gracillariidae	Phyllonorycter	Kate Perez	BIN Taxonomy Match	August
GMTPZ	GMGMD	GMGMD1014-14	Specimen on BOLD	BIOUG16616-A03	GMP#06018	BOLD:ACR3738	BIN on BOLD	BIOUG16616-A03	555	16-Sep-2013	Lepidoptera	Gracillariidae	Phyllonorycter	Kate Perez	BIN Taxonomy Match	September
GMTPZ	GMGMD	GMGMD1031-14	Specimen on BOLD	BIOUG16616-B08	GMP#06018	BOLD:ACR3738	BIN on BOLD	BIOUG16616-B08	576	16-Sep-2013	Lepidoptera	Gracillariidae	Phyllonorycter	Kate Perez	BIN Taxonomy Match	September
GMTPZ	GMGMD	GMGMD1050-14	Specimen on BOLD	BIOUG16616-D03	GMP#06018	BOLD:ACR3738	BIN on BOLD	BIOUG16616-D03	555	16-Sep-2013	Lepidoptera	Gracillariidae	Phyllonorycter	Kate Perez	BIN Taxonomy Match	September
GMTPZ	GMGMD	GMGMD1055-14	Specimen on BOLD	BIOUG16616-D08	GMP#06018	BOLD:ACR3738	BIN on BOLD	BIOUG16616-D08	576	16-Sep-2013	Lepidoptera	Gracillariidae	Phyllonorycter	Kate Perez	BIN Taxonomy Match	September
GMTPZ	GMGMD	GMGMD1056-14	Specimen on BOLD	BIOUG16616-D09	GMP#06018	BOLD:ACR3738	BIN on BOLD	BIOUG16616-D09	522	16-Sep-2013	Lepidoptera	Gracillariidae	Phyllonorycter	Kate Perez	BIN Taxonomy Match	September
GMTPZ	GMGMK	GMGMK1526-14	Specimen on BOLD	BIOUG17226-G03	GMP#06026	BOLD:ACR3738	BIN on BOLD	BIOUG17226-G03	582	17-Jun-2014	Lepidoptera	Gracillariidae	Phyllonorycter	Kate Perez	BIN Taxonomy Match	June
GMTPZ	GMGMK	GMGMK915-14	Specimen on BOLD	BIOUG17181-C10	GMP#06026	BOLD:ACR3738	BIN on BOLD	BIOUG17181-C10	576	17-Jun-2014	Lepidoptera	Gracillariidae	Phyllonorycter	Kate Perez	BIN Taxonomy Match	June
GMTPZ	GMGMK	GMGMK918-14	Specimen on BOLD	BIOUG17181-D01	GMP#06026	BOLD:ACR3738	BIN on BOLD	BIOUG17181-D01	608	17-Jun-2014	Lepidoptera	Gracillariidae	Phyllonorycter	Kate Perez	BIN Taxonomy Match	June
GMTPZ	GMGML	GMGML1012-14	Specimen on BOLD	BIOUG17268-B05	GMP#06027	BOLD:ACR3738	BIN on BOLD	BIOUG17268-B05	594	01-Jul-2014	Lepidoptera	Gracillariidae	Phyllonorycter	Kate Perez	BIN Taxonomy Match	July
GMTPZ	GMGMM	GMGMM1276-14	Specimen on BOLD	BIOUG17377-C01	GMP#06028	BOLD:ACR3738	BIN on BOLD	BIOUG17377-C01	594	15-Jul-2014	Lepidoptera	Gracillariidae	Phyllonorycter	Kate Perez	BIN Taxonomy Match	July
GMTPZ	GMGMM	GMGMM1329-14	Specimen on BOLD	BIOUG17377-G06	GMP#06028	BOLD:ACR3738	BIN on BOLD	BIOUG17377-G06	579	15-Jul-2014	Lepidoptera	Gracillariidae	Phyllonorycter	Kate Perez	BIN Taxonomy Match	July
GMTPZ	GMGMM	GMGMM1340-14	Specimen on BOLD	BIOUG17377-H05	GMP#06028	BOLD:ACR3738	BIN on BOLD	BIOUG17377-H05	555	15-Jul-2014	Lepidoptera	Gracillariidae	Phyllonorycter	Kate Perez	BIN Taxonomy Match	July
GMTPZ	GMGMB	GMGMB1193-14	Specimen on BOLD	BIOUG16280-C04	GMP#06017	BOLD:AAA2408	BIN on BOLD	BIOUG16280-C04	582	26-Aug-2013	Hymenoptera	Braconidae	Microplitis	Kate Perez	BIN Taxonomy Match	August
GMTPZ	GMGMB	GMGMB141-14	Specimen on BOLD	BIOUG16269-B09	GMP#06017	BOLD:AAA2408	BIN on BOLD	BIOUG16269-B09	579	26-Aug-2013	Hymenoptera	Braconidae	Microplitis	Kate Perez	BIN Taxonomy Match	August
GMTPZ	GMGMC	GMGMC1370-14	Specimen on BOLD	BIOUG16528-B11	GMP#06016	BOLD:AAA2408	BIN on BOLD	BIOUG16528-B11	564	08-Aug-2013	Hymenoptera	Braconidae	Microplitis	Kate Perez	BIN Taxonomy Match	August
GMTPZ	GMGMC	GMGMC897-14	Specimen on BOLD	BIOUG16523-C01	GMP#06016	BOLD:AAA2408	BIN on BOLD	BIOUG16523-C01	594	08-Aug-2013	Hymenoptera	Braconidae	Microplitis	Kate Perez	BIN Taxonomy Match	August
GMTPZ	GMGMD	GMGMD1110-14	Specimen on BOLD	BIOUG16617-A04	GMP#06018	BOLD:AAA2408	BIN on BOLD	BIOUG16617-A04	528	16-Sep-2013	Hymenoptera	Braconidae	Microplitis	Kate Perez	BIN Taxonomy Match	September
GMTPZ	GMGMD	GMGMD451-14	Specimen on BOLD	BIOUG16610-A10	GMP#06018	BOLD:AAA2408	BIN on BOLD	BIOUG16610-A10	585	16-Sep-2013	Hymenoptera	Braconidae	Microplitis	Kate Perez	BIN Taxonomy Match	September
GMTPZ	GMGMD	GMGMD563-14	Specimen on BOLD	BIOUG16611-C03	GMP#06018	BOLD:AAA2408	BIN on BOLD	BIOUG16611-C03	555	16-Sep-2013	Hymenoptera	Braconidae	Microplitis	Kate Perez	BIN Taxonomy Match	September
GMTPZ	GMGMD	GMGMD598-14	Specimen on BOLD	BIOUG16611-F02	GMP#06018	BOLD:AAA2408	BIN on BOLD	BIOUG16611-F02	555	16-Sep-2013	Hymenoptera	Braconidae	Microplitis	Kate Perez	BIN Taxonomy Match	September
GMTPZ	GMGMD	GMGMD606-14	Specimen on BOLD	BIOUG16611-F10	GMP#06018	BOLD:AAA2408	BIN on BOLD	BIOUG16611-F10	576	16-Sep-2013	Hymenoptera	Braconidae	Microplitis	Kate Perez	BIN Taxonomy Match	September
GMTPZ	GMGMN	GMGMN614-14	Specimen on BOLD	BIOUG17439-E09	GMP#06029	BOLD:AAA2408	BIN on BOLD	BIOUG17439-E09	588	29-Jul-2014	Hymenoptera	Braconidae	Microplitis	Kate Perez	BIN Taxonomy Match	July
GMTPZ	GMGMA	GMGMA1470-14	Specimen on BOLD	BIOUG16220-D02	GMP#06015	BOLD:AAA3092	BIN on BOLD	BIOUG16220-D02	603	25-Jul-2013	Hymenoptera	Braconidae	Microplitis	Kate Perez	BIN Taxonomy Match	July
GMTPZ	GMGMB	GMGMB788-14	Specimen on BOLD	BIOUG16276-A03	GMP#06017	BOLD:AAA3092	BIN on BOLD	BIOUG16276-A03	576	26-Aug-2013	Hymenoptera	Braconidae	Microplitis	Kate Perez	BIN Taxonomy Match	August
GMTPZ	GMGMJ	GMGMJ1273-14	Specimen on BOLD	BIOUG17097-C07	GMP#06025	BOLD:AAA3092	BIN on BOLD	BIOUG17097-C07	558	02-Jun-2014	Hymenoptera	Braconidae	Microplitis	Kate Perez	BIN Taxonomy Match	June
GMTPZ	GMGMJ	GMGMJ1320-14	Specimen on BOLD	BIOUG17097-G06	GMP#06025	BOLD:AAA3092	BIN on BOLD	BIOUG17097-G06	561	02-Jun-2014	Hymenoptera	Braconidae	Microplitis	Kate Perez	BIN Taxonomy Match	June
GMTPZ	GMGMJ	GMGMJ1321-14	Specimen on BOLD	BIOUG17097-G07	GMP#06025	BOLD:AAA3092	BIN on BOLD	BIOUG17097-G07	594	02-Jun-2014	Hymenoptera	Braconidae	Microplitis	Kate Perez	BIN Taxonomy Match	June
GMTPZ	GMGMJ	GMGMJ1446-14	Specimen on BOLD	BIOUG17099-B02	GMP#06025	BOLD:AAA3092	BIN on BOLD	BIOUG17099-B02	588	02-Jun-2014	Hymenoptera	Braconidae	Microplitis	Kate Perez	BIN Taxonomy Match	June
GMTPZ	GMGMK	GMGMK1492-14	Specimen on BOLD	BIOUG17226-D05	GMP#06026	BOLD:AAA3092	BIN on BOLD	BIOUG17226-D05	588	17-Jun-2014	Hymenoptera	Braconidae	Microplitis	Kate Perez	BIN Taxonomy Match	June
GMTPZ	GMGMK	GMGMK1494-14	Specimen on BOLD	BIOUG17226-D07	GMP#06026	BOLD:AAA3092	BIN on BOLD	BIOUG17226-D07	600	17-Jun-2014	Hymenoptera	Braconidae	Microplitis	Kate Perez	BIN Taxonomy Match	June
GMTPZ	GMGMK	GMGMK1505-14	Specimen on BOLD	BIOUG17226-E06	GMP#06026	BOLD:AAA3092	BIN on BOLD	BIOUG17226-E06	585	17-Jun-2014	Hymenoptera	Braconidae	Microplitis	Kate Perez	BIN Taxonomy Match	June
GMTPZ	GMGMK	GMGMK431-14	Specimen on BOLD	BIOUG17176-C01	GMP#06026	BOLD:AAA3092	BIN on BOLD	BIOUG17176-C01	564	17-Jun-2014	Hymenoptera	Braconidae	Microplitis	Kate Perez	BIN Taxonomy Match	June
GMTPZ	GMGMK	GMGMK482-14	Specimen on BOLD	BIOUG17176-G04	GMP#06026	BOLD:AAA3092	BIN on BOLD	BIOUG17176-G04	564	17-Jun-2014	Hymenoptera	Braconidae	Microplitis	Kate Perez	BIN Taxonomy Match	June
GMTPZ	GMGMK	GMGMK695-14	Specimen on BOLD	BIOUG17179-A04	GMP#06026	BOLD:AAA3092	BIN on BOLD	BIOUG17179-A04	558	17-Jun-2014	Hymenoptera	Braconidae	Microplitis	Kate Perez	BIN Taxonomy Match	June
GMTPZ	GMGMK	GMGMK727-14	Specimen on BOLD	BIOUG17179-C12	GMP#06026	BOLD:AAA3092	BIN on BOLD	BIOUG17179-C12	546	17-Jun-2014	Hymenoptera	Braconidae	Microplitis	Kate Perez	BIN Taxonomy Match	June
GMTPZ	GMGML	GMGML1532-14	Specimen on BOLD	BIOUG17272-F02	GMP#06027	BOLD:AAA3092	BIN on BOLD	BIOUG17272-F02	600	01-Jul-2014	Hymenoptera	Braconidae	Microplitis	Kate Perez	BIN Taxonomy Match	July
GMTPZ	GMGML	GMGML1555-14	Specimen on BOLD	BIOUG17272-H01	GMP#06027	BOLD:AAA3092	BIN on BOLD	BIOUG17272-H01	594	01-Jul-2014	Hymenoptera	Braconidae	Microplitis	Kate Perez	BIN Taxonomy Match	July
GMTPZ	GMGML	GMGML651-14	Specimen on BOLD	BIOUG17263-C12	GMP#06027	BOLD:AAA3092	BIN on BOLD	BIOUG17263-C12	600	01-Jul-2014	Hymenoptera	Braconidae	Microplitis	Kate Perez	BIN Taxonomy Match	July
GMTPZ	GMGML	GMGML664-14	Specimen on BOLD	BIOUG17263-E01	GMP#06027	BOLD:AAA3092	BIN on BOLD	BIOUG17263-E01	594	01-Jul-2014	Hymenoptera	Braconidae	Microplitis	Kate Perez	BIN Taxonomy Match	July
GMTPZ	GMGML	GMGML683-14	Specimen on BOLD	BIOUG17263-F08	GMP#06027	BOLD:AAA3092	BIN on BOLD	BIOUG17263-F08	588	01-Jul-2014	Hymenoptera	Braconidae	Microplitis	Kate Perez	BIN Taxonomy Match	July
GMTPZ	GMGML	GMGML984-14	Specimen on BOLD	BIOUG17267-G12	GMP#06027	BOLD:AAA3092	BIN on BOLD	BIOUG17267-G12	594	01-Jul-2014	Hymenoptera	Braconidae	Microplitis	Kate Perez	BIN Taxonomy Match	July
GMTPZ	GMGMM	GMGMM692-14	Specimen on BOLD	BIOUG17304-A11	GMP#06028	BOLD:AAA3092	BIN on BOLD	BIOUG17304-A11	594	15-Jul-2014	Hymenoptera	Braconidae	Microplitis	Kate Perez	BIN Taxonomy Match	July
GMTPZ	GMGMM	GMGMM722-14	Specimen on BOLD	BIOUG17304-D05	GMP#06028	BOLD:AAA3092	BIN on BOLD	BIOUG17304-D05	591	15-Jul-2014	Hymenoptera	Braconidae	Microplitis	Kate Perez	BIN Taxonomy Match	July
GMTPZ	GMGMC	GMGMC1012-14	Specimen on BOLD	BIOUG16524-D09	GMP#06016	BOLD:AAA3095	BIN on BOLD	BIOUG16524-D09	591	08-Aug-2013	Hymenoptera	Braconidae	Microplitis	Kate Perez	BIN Taxonomy Match	August
GMTPZ	GMGMC	GMGMC1394-14	Specimen on BOLD	BIOUG16528-D11	GMP#06016	BOLD:AAA3095	BIN on BOLD	BIOUG16528-D11	587	08-Aug-2013	Hymenoptera	Braconidae	Microplitis	Kate Perez	BIN Taxonomy Match	August
GMTPZ	GMGMC	GMGMC417-14	Specimen on BOLD	BIOUG16359-E07	GMP#06016	BOLD:AAA3095	BIN on BOLD	BIOUG16359-E07	594	08-Aug-2013	Hymenoptera	Braconidae	Microplitis	Kate Perez	BIN Taxonomy Match	August
GMTPE	GMGRF	GMGRF991-13	Specimen on BOLD	BIOUG07412-D05	bayw.11	BOLD:AAA3095	BIN on BOLD	BIOUG07412-D05	575	25-Jul-2012	Hymenoptera	Braconidae	Microplitis	Kate Perez	BIN Taxonomy Match	July
GMTPE	GMGRF	GMGRF993-13	Specimen on BOLD	BIOUG07412-D07	bayw.11	BOLD:AAA3095	BIN on BOLD	BIOUG07412-D07	575	25-Jul-2012	Hymenoptera	Braconidae	Microplitis	Kate Perez	BIN Taxonomy Match	July
GMTPE	GMGRE	GMGRE761-13	Specimen on BOLD	BIOUG06089-F01	bayw.9	BOLD:AAA3096	BIN on BOLD	BIOUG06089-F01	658	04-Jul-2012	Hymenoptera	Braconidae	Microplitis	Kate Perez	BIN Taxonomy Match	July
GMTPZ	GMGMA	GMGMA1230-14	Specimen on BOLD	BIOUG16217-G11	GMP#06015	BOLD:AAA3097	BIN on BOLD	BIOUG16217-G11	591	25-Jul-2013	Hymenoptera	Braconidae	Microplitis	Kate Perez	BIN Taxonomy Match	July
GMTPZ	GMGMC	GMGMC442-14	Specimen on BOLD	BIOUG16359-G08	GMP#06016	BOLD:AAA3097	BIN on BOLD	BIOUG16359-G08	588	08-Aug-2013	Hymenoptera	Braconidae	Microplitis	Kate Perez	BIN Taxonomy Match	August
GMTPZ	GMGMI	GMGMI601-14	Specimen on BOLD	BIOUG17113-C02	GMP#06024	BOLD:AAA3097	BIN on BOLD	BIOUG17113-C02	601	16-May-2014	Hymenoptera	Braconidae	Microplitis	Kate Perez	BIN Taxonomy Match	May
GMTPZ	GMGMI	GMGMI634-14	Specimen on BOLD	BIOUG17113-E11	GMP#06024	BOLD:AAA3097	BIN on BOLD	BIOUG17113-E11	562	16-May-2014	Hymenoptera	Braconidae	Microplitis	Kate Perez	BIN Taxonomy Match	May
GMTPZ	GMGMI	GMGMI867-14	Specimen on BOLD	BIOUG17116-A07	GMP#06024	BOLD:AAA3097	BIN on BOLD	BIOUG17116-A07	585	16-May-2014	Hymenoptera	Braconidae	Microplitis	Kate Perez	BIN Taxonomy Match	May
GMTPZ	GMGMK	GMGMK1498-14	Specimen on BOLD	BIOUG17226-D11	GMP#06026	BOLD:AAA3097	BIN on BOLD	BIOUG17226-D11	594	17-Jun-2014	Hymenoptera	Braconidae	Microplitis	Kate Perez	BIN Taxonomy Match	June
GMTPZ	GMGML	GMGML1511-14	Specimen on BOLD	BIOUG17272-D05	GMP#06027	BOLD:AAA3097	BIN on BOLD	BIOUG17272-D05	594	01-Jul-2014	Hymenoptera	Braconidae	Microplitis	Kate Perez	BIN Taxonomy Match	July
GMTPZ	GMGML	GMGML1543-14	Specimen on BOLD	BIOUG17272-G01	GMP#06027	BOLD:AAA3097	BIN on BOLD	BIOUG17272-G01	600	01-Jul-2014	Hymenoptera	Braconidae	Microplitis	Kate Perez	BIN Taxonomy Match	July
GMTPZ	GMGML	GMGML628-14	Specimen on BOLD	BIOUG17263-B01	GMP#06027	BOLD:AAA3097	BIN on BOLD	BIOUG17263-B01	600	01-Jul-2014	Hymenoptera	Braconidae	Microplitis	Kate Perez	BIN Taxonomy Match	July
GMTPZ	GMGML	GMGML629-14	Specimen on BOLD	BIOUG17263-B02	GMP#06027	BOLD:AAA3097	BIN on BOLD	BIOUG17263-B02	594	01-Jul-2014	Hymenoptera	Braconidae	Microplitis	Kate Perez	BIN Taxonomy Match	July
GMTPZ	GMGML	GMGML670-14	Specimen on BOLD	BIOUG17263-E07	GMP#06027	BOLD:AAA3097	BIN on BOLD	BIOUG17263-E07	594	01-Jul-2014	Hymenoptera	Braconidae	Microplitis	Kate Perez	BIN Taxonomy Match	July
GMTPZ	GMGML	GMGML676-14	Specimen on BOLD	BIOUG17263-F01	GMP#06027	BOLD:AAA3097	BIN on BOLD	BIOUG17263-F01	594	01-Jul-2014	Hymenoptera	Braconidae	Microplitis	Kate Perez	BIN Taxonomy Match	July
GMTPZ	GMGML	GMGML687-14	Specimen on BOLD	BIOUG17263-F12	GMP#06027	BOLD:AAA3097	BIN on BOLD	BIOUG17263-F12	594	01-Jul-2014	Hymenoptera	Braconidae	Microplitis	Kate Perez	BIN Taxonomy Match	July
GMTPZ	GMGML	GMGML921-14	Specimen on BOLD	BIOUG17267-B09	GMP#06027	BOLD:AAA3097	BIN on BOLD	BIOUG17267-B09	594	01-Jul-2014	Hymenoptera	Braconidae	Microplitis	Kate Perez	BIN Taxonomy Match	July
GMTPZ	GMGML	GMGML943-14	Specimen on BOLD	BIOUG17267-D07	GMP#06027	BOLD:AAA3097	BIN on BOLD	BIOUG17267-D07	600	01-Jul-2014	Hymenoptera	Braconidae	Microplitis	Kate Perez	BIN Taxonomy Match	July
GMTPZ	GMGML	GMGML949-14	Specimen on BOLD	BIOUG17267-E01	GMP#06027	BOLD:AAA3097	BIN on BOLD	BIOUG17267-E01	594	01-Jul-2014	Hymenoptera	Braconidae	Microplitis	Kate Perez	BIN Taxonomy Match	July
GMTPZ	GMGMM	GMGMM725-14	Specimen on BOLD	BIOUG17304-D08	GMP#06028	BOLD:AAA3097	BIN on BOLD	BIOUG17304-D08	588	15-Jul-2014	Hymenoptera	Braconidae	Microplitis	Kate Perez	BIN Taxonomy Match	July
GMTPZ	GMGMM	GMGMM875-14	Specimen on BOLD	BIOUG17373-A04	GMP#06028	BOLD:AAA3097	BIN on BOLD	BIOUG17373-A04	591	15-Jul-2014	Hymenoptera	Braconidae	Microplitis	Kate Perez	BIN Taxonomy Match	July
GMTPZ	GMGMA	GMGMA112-14	Specimen on BOLD	BIOUG15978-A10	GMP#06015	BOLD:AAA4188	BIN on BOLD	BIOUG15978-A10	543	25-Jul-2013	Hymenoptera	Braconidae	Aphidius	Kate Perez	BOLD ID Engine Manual	July
GMTPZ	GMGMA	GMGMA1199-14	Specimen on BOLD	BIOUG16217-E04	GMP#06015	BOLD:AAA4188	BIN on BOLD	BIOUG16217-E04	573	25-Jul-2013	Hymenoptera	Braconidae	Aphidius	Kate Perez	BOLD ID Engine Manual	July
GMTPZ	GMGMA	GMGMA1480-14	Specimen on BOLD	BIOUG16220-D12	GMP#06015	BOLD:AAA4188	BIN on BOLD	BIOUG16220-D12	582	25-Jul-2013	Hymenoptera	Braconidae	Aphidius	Kate Perez	BOLD ID Engine Manual	July
GMTPZ	GMGMC	GMGMC1026-14	Specimen on BOLD	BIOUG16524-E11	GMP#06016	BOLD:AAA4188	BIN on BOLD	BIOUG16524-E11	590	08-Aug-2013	Hymenoptera	Braconidae	Aphidius	Kate Perez	BOLD ID Engine Manual	August
GMTPZ	GMGMC	GMGMC1406-14	Specimen on BOLD	BIOUG16528-E11	GMP#06016	BOLD:AAA4188	BIN on BOLD	BIOUG16528-E11	552	08-Aug-2013	Hymenoptera	Braconidae	Aphidius	Kate Perez	BOLD ID Engine Manual	August
GMTPZ	GMGMM	GMGMM750-14	Specimen on BOLD	BIOUG17304-F09	GMP#06028	BOLD:AAA5826	BIN on BOLD	BIOUG17304-F09	600	15-Jul-2014	Hymenoptera	Braconidae	Dolichogenidea	Kate Perez	BIN Taxonomy Match	July
GMTPZ	GMGMA	GMGMA105-14	Specimen on BOLD	BIOUG15978-A03	GMP#06015	BOLD:AAA6099	BIN on BOLD	BIOUG15978-A03	576	25-Jul-2013	Hymenoptera	Braconidae	0	Kate Perez	BOLD ID Engine Manual	July
GMTPZ	GMGMK	GMGMK731-14	Specimen on BOLD	BIOUG17179-D04	GMP#06026	BOLD:AAA6099	BIN on BOLD	BIOUG17179-D04	558	17-Jun-2014	Hymenoptera	Braconidae	0	Kate Perez	BOLD ID Engine Manual	June
GMTPZ	GMGMA	GMGMA1239-14	Specimen on BOLD	BIOUG16217-H08	GMP#06015	BOLD:AAA7151	BIN on BOLD	BIOUG16217-H08	576	25-Jul-2013	Hymenoptera	Braconidae	Protapanteles	Kate Perez	BIN Taxonomy Match	July
GMTPE	GMGRE	GMGRE705-13	Specimen on BOLD	BIOUG06089-A05	bayw.9	BOLD:AAA7154	BIN on BOLD	BIOUG06089-A05	658	04-Jul-2012	Hymenoptera	Braconidae	Protapanteles	Kate Perez	BIN Taxonomy Match	July
GMTPZ	GMGMN	GMGMN1243-14	Specimen on BOLD	BIOUG17446-B09	GMP#06029	BOLD:AAA7374	BIN on BOLD	BIOUG17446-B09	621	29-Jul-2014	Hymenoptera	Ichneumonidae	Acrotomus	Kate Perez	BOLD ID Engine Manual	July
GMTPZ	GMGMN	GMGMN1248-14	Specimen on BOLD	BIOUG17446-C02	GMP#06029	BOLD:AAA7374	BIN on BOLD	BIOUG17446-C02	621	29-Jul-2014	Hymenoptera	Ichneumonidae	Acrotomus	Kate Perez	BOLD ID Engine Manual	July
GMTPZ	GMGMN	GMGMN1256-14	Specimen on BOLD	BIOUG17446-C10	GMP#06029	BOLD:AAA7374	BIN on BOLD	BIOUG17446-C10	611	29-Jul-2014	Hymenoptera	Ichneumonidae	Acrotomus	Kate Perez	BOLD ID Engine Manual	July
GMTPZ	GMGMN	GMGMN1260-14	Specimen on BOLD	BIOUG17446-D02	GMP#06029	BOLD:AAA7374	BIN on BOLD	BIOUG17446-D02	636	29-Jul-2014	Hymenoptera	Ichneumonidae	Acrotomus	Kate Perez	BOLD ID Engine Manual	July
GMTPZ	GMGMN	GMGMN1261-14	Specimen on BOLD	BIOUG17446-D03	GMP#06029	BOLD:AAA7374	BIN on BOLD	BIOUG17446-D03	603	29-Jul-2014	Hymenoptera	Ichneumonidae	Acrotomus	Kate Perez	BOLD ID Engine Manual	July
GMTPZ	GMGMN	GMGMN1263-14	Specimen on BOLD	BIOUG17446-D05	GMP#06029	BOLD:AAA7374	BIN on BOLD	BIOUG17446-D05	610	29-Jul-2014	Hymenoptera	Ichneumonidae	Acrotomus	Kate Perez	BOLD ID Engine Manual	July
GMTPZ	GMGMN	GMGMN1271-14	Specimen on BOLD	BIOUG17446-E01	GMP#06029	BOLD:AAA7374	BIN on BOLD	BIOUG17446-E01	609	29-Jul-2014	Hymenoptera	Ichneumonidae	Acrotomus	Kate Perez	BOLD ID Engine Manual	July
GMTPZ	GMGMN	GMGMN1277-14	Specimen on BOLD	BIOUG17446-E07	GMP#06029	BOLD:AAA7374	BIN on BOLD	BIOUG17446-E07	603	29-Jul-2014	Hymenoptera	Ichneumonidae	Acrotomus	Kate Perez	BOLD ID Engine Manual	July
GMTPZ	GMGMN	GMGMN1278-14	Specimen on BOLD	BIOUG17446-E08	GMP#06029	BOLD:AAA7374	BIN on BOLD	BIOUG17446-E08	610	29-Jul-2014	Hymenoptera	Ichneumonidae	Acrotomus	Kate Perez	BOLD ID Engine Manual	July
GMTPZ	GMGMN	GMGMN1279-14	Specimen on BOLD	BIOUG17446-E09	GMP#06029	BOLD:AAA7374	BIN on BOLD	BIOUG17446-E09	564	29-Jul-2014	Hymenoptera	Ichneumonidae	Acrotomus	Kate Perez	BOLD ID Engine Manual	July
GMTPZ	GMGMN	GMGMN1284-14	Specimen on BOLD	BIOUG17446-F02	GMP#06029	BOLD:AAA7374	BIN on BOLD	BIOUG17446-F02	621	29-Jul-2014	Hymenoptera	Ichneumonidae	Acrotomus	Kate Perez	BOLD ID Engine Manual	July
GMTPZ	GMGMN	GMGMN1285-14	Specimen on BOLD	BIOUG17446-F03	GMP#06029	BOLD:AAA7374	BIN on BOLD	BIOUG17446-F03	635	29-Jul-2014	Hymenoptera	Ichneumonidae	Acrotomus	Kate Perez	BOLD ID Engine Manual	July
GMTPZ	GMGMN	GMGMN1288-14	Specimen on BOLD	BIOUG17446-F06	GMP#06029	BOLD:AAA7374	BIN on BOLD	BIOUG17446-F06	610	29-Jul-2014	Hymenoptera	Ichneumonidae	Acrotomus	Kate Perez	BOLD ID Engine Manual	July
GMTPZ	GMGMN	GMGMN1290-14	Specimen on BOLD	BIOUG17446-F08	GMP#06029	BOLD:AAA7374	BIN on BOLD	BIOUG17446-F08	603	29-Jul-2014	Hymenoptera	Ichneumonidae	Acrotomus	Kate Perez	BOLD ID Engine Manual	July
GMTPZ	GMGMN	GMGMN1293-14	Specimen on BOLD	BIOUG17446-F11	GMP#06029	BOLD:AAA7374	BIN on BOLD	BIOUG17446-F11	603	29-Jul-2014	Hymenoptera	Ichneumonidae	Acrotomus	Kate Perez	BOLD ID Engine Manual	July
GMTPZ	GMGMN	GMGMN1294-14	Specimen on BOLD	BIOUG17446-F12	GMP#06029	BOLD:AAA7374	BIN on BOLD	BIOUG17446-F12	610	29-Jul-2014	Hymenoptera	Ichneumonidae	Acrotomus	Kate Perez	BOLD ID Engine Manual	July
GMTPZ	GMGMN	GMGMN1297-14	Specimen on BOLD	BIOUG17446-G03	GMP#06029	BOLD:AAA7374	BIN on BOLD	BIOUG17446-G03	632	29-Jul-2014	Hymenoptera	Ichneumonidae	Acrotomus	Kate Perez	BOLD ID Engine Manual	July
GMTPZ	GMGMN	GMGMN1298-14	Specimen on BOLD	BIOUG17446-G04	GMP#06029	BOLD:AAA7374	BIN on BOLD	BIOUG17446-G04	618	29-Jul-2014	Hymenoptera	Ichneumonidae	Acrotomus	Kate Perez	BOLD ID Engine Manual	July
GMTPZ	GMGMN	GMGMN1306-14	Specimen on BOLD	BIOUG17446-G12	GMP#06029	BOLD:AAA7374	BIN on BOLD	BIOUG17446-G12	621	29-Jul-2014	Hymenoptera	Ichneumonidae	Acrotomus	Kate Perez	BOLD ID Engine Manual	July
GMTPZ	GMGMN	GMGMN1307-14	Specimen on BOLD	BIOUG17446-H01	GMP#06029	BOLD:AAA7374	BIN on BOLD	BIOUG17446-H01	565	29-Jul-2014	Hymenoptera	Ichneumonidae	Acrotomus	Kate Perez	BOLD ID Engine Manual	July
GMTPZ	GMGMN	GMGMN1315-14	Specimen on BOLD	BIOUG17446-H09	GMP#06029	BOLD:AAA7374	BIN on BOLD	BIOUG17446-H09	638	29-Jul-2014	Hymenoptera	Ichneumonidae	Acrotomus	Kate Perez	BOLD ID Engine Manual	July
GMTPZ	GMGMN	GMGMN1316-14	Specimen on BOLD	BIOUG17446-H10	GMP#06029	BOLD:AAA7374	BIN on BOLD	BIOUG17446-H10	612	29-Jul-2014	Hymenoptera	Ichneumonidae	Acrotomus	Kate Perez	BOLD ID Engine Manual	July
GMTPZ	GMGMN	GMGMN1317-14	Specimen on BOLD	BIOUG17446-H11	GMP#06029	BOLD:AAA7374	BIN on BOLD	BIOUG17446-H11	637	29-Jul-2014	Hymenoptera	Ichneumonidae	Acrotomus	Kate Perez	BOLD ID Engine Manual	July
GMTPZ	GMGMN	GMGMN1448-14	Specimen on BOLD	BIOUG17466-C12	GMP#06029	BOLD:AAA7374	BIN on BOLD	BIOUG17466-C12	600	29-Jul-2014	Hymenoptera	Ichneumonidae	Acrotomus	Kate Perez	BOLD ID Engine Manual	July
GMTPZ	GMGMN	GMGMN1450-14	Specimen on BOLD	BIOUG17466-D02	GMP#06029	BOLD:AAA7374	BIN on BOLD	BIOUG17466-D02	549	29-Jul-2014	Hymenoptera	Ichneumonidae	Acrotomus	Kate Perez	BOLD ID Engine Manual	July
GMTPZ	GMGMN	GMGMN1463-14	Specimen on BOLD	BIOUG17466-E03	GMP#06029	BOLD:AAA7374	BIN on BOLD	BIOUG17466-E03	588	29-Jul-2014	Hymenoptera	Ichneumonidae	Acrotomus	Kate Perez	BOLD ID Engine Manual	July
GMTPZ	GMGMN	GMGMN1464-14	Specimen on BOLD	BIOUG17466-E04	GMP#06029	BOLD:AAA7374	BIN on BOLD	BIOUG17466-E04	585	29-Jul-2014	Hymenoptera	Ichneumonidae	Acrotomus	Kate Perez	BOLD ID Engine Manual	July
GMTPZ	GMGMN	GMGMN1472-14	Specimen on BOLD	BIOUG17466-E12	GMP#06029	BOLD:AAA7374	BIN on BOLD	BIOUG17466-E12	604	29-Jul-2014	Hymenoptera	Ichneumonidae	Acrotomus	Kate Perez	BOLD ID Engine Manual	July
GMTPZ	GMGMN	GMGMN1474-14	Specimen on BOLD	BIOUG17466-F02	GMP#06029	BOLD:AAA7374	BIN on BOLD	BIOUG17466-F02	543	29-Jul-2014	Hymenoptera	Ichneumonidae	Acrotomus	Kate Perez	BOLD ID Engine Manual	July
GMTPZ	GMGMN	GMGMN1475-14	Specimen on BOLD	BIOUG17466-F03	GMP#06029	BOLD:AAA7374	BIN on BOLD	BIOUG17466-F03	579	29-Jul-2014	Hymenoptera	Ichneumonidae	Acrotomus	Kate Perez	BOLD ID Engine Manual	July
GMTPZ	GMGMN	GMGMN1476-14	Specimen on BOLD	BIOUG17466-F04	GMP#06029	BOLD:AAA7374	BIN on BOLD	BIOUG17466-F04	579	29-Jul-2014	Hymenoptera	Ichneumonidae	Acrotomus	Kate Perez	BOLD ID Engine Manual	July
GMTPZ	GMGMN	GMGMN1477-14	Specimen on BOLD	BIOUG17466-F05	GMP#06029	BOLD:AAA7374	BIN on BOLD	BIOUG17466-F05	546	29-Jul-2014	Hymenoptera	Ichneumonidae	Acrotomus	Kate Perez	BOLD ID Engine Manual	July
GMTPZ	GMGMN	GMGMN1480-14	Specimen on BOLD	BIOUG17466-F08	GMP#06029	BOLD:AAA7374	BIN on BOLD	BIOUG17466-F08	576	29-Jul-2014	Hymenoptera	Ichneumonidae	Acrotomus	Kate Perez	BOLD ID Engine Manual	July
GMTPZ	GMGMN	GMGMN1487-14	Specimen on BOLD	BIOUG17466-G03	GMP#06029	BOLD:AAA7374	BIN on BOLD	BIOUG17466-G03	567	29-Jul-2014	Hymenoptera	Ichneumonidae	Acrotomus	Kate Perez	BOLD ID Engine Manual	July
GMTPZ	GMGMN	GMGMN1489-14	Specimen on BOLD	BIOUG17466-G05	GMP#06029	BOLD:AAA7374	BIN on BOLD	BIOUG17466-G05	606	29-Jul-2014	Hymenoptera	Ichneumonidae	Acrotomus	Kate Perez	BOLD ID Engine Manual	July
GMTPZ	GMGMN	GMGMN1493-14	Specimen on BOLD	BIOUG17466-G09	GMP#06029	BOLD:AAA7374	BIN on BOLD	BIOUG17466-G09	576	29-Jul-2014	Hymenoptera	Ichneumonidae	Acrotomus	Kate Perez	BOLD ID Engine Manual	July
GMTPZ	GMGMN	GMGMN1497-14	Specimen on BOLD	BIOUG17466-H01	GMP#06029	BOLD:AAA7374	BIN on BOLD	BIOUG17466-H01	588	29-Jul-2014	Hymenoptera	Ichneumonidae	Acrotomus	Kate Perez	BOLD ID Engine Manual	July
GMTPZ	GMGMN	GMGMN1501-14	Specimen on BOLD	BIOUG17466-H05	GMP#06029	BOLD:AAA7374	BIN on BOLD	BIOUG17466-H05	588	29-Jul-2014	Hymenoptera	Ichneumonidae	Acrotomus	Kate Perez	BOLD ID Engine Manual	July
GMTPZ	GMGMN	GMGMN1565-14	Specimen on BOLD	BIOUG17467-E10	GMP#06029	BOLD:AAA7374	BIN on BOLD	BIOUG17467-E10	576	29-Jul-2014	Hymenoptera	Ichneumonidae	Acrotomus	Kate Perez	BOLD ID Engine Manual	July
GMTPZ	GMGMN	GMGMN1574-14	Specimen on BOLD	BIOUG17467-F07	GMP#06029	BOLD:AAA7374	BIN on BOLD	BIOUG17467-F07	564	29-Jul-2014	Hymenoptera	Ichneumonidae	Acrotomus	Kate Perez	BOLD ID Engine Manual	July
GMTPZ	GMGMN	GMGMN1602-14	Specimen on BOLD	BIOUG17467-H11	GMP#06029	BOLD:AAA7374	BIN on BOLD	BIOUG17467-H11	534	29-Jul-2014	Hymenoptera	Ichneumonidae	Acrotomus	Kate Perez	BOLD ID Engine Manual	July
GMTPZ	GMGMN	GMGMN1245-14	Specimen on BOLD	BIOUG17446-B11	GMP#06029	BOLD:AAA7470	BIN on BOLD	BIOUG17446-B11	633	29-Jul-2014	Hymenoptera	Ichneumonidae	Acrotomus	Kate Perez	BOLD ID Engine Manual	July
GMTPE	GMGRB	GMGRB1830-13	Specimen on BOLD	BIOUG05262-B04	bayw.3	BOLD:AAA7636	BIN on BOLD	BIOUG05262-B04	619	18-May-2012	Hymenoptera	Braconidae	Dinotrema	Kate Perez	BIN Taxonomy Match	May
GMTPE	GMGRC	GMGRC2208-13	Specimen on BOLD	BIOUG05482-A11	bayw.5	BOLD:AAA7636	BIN on BOLD	BIOUG05482-A11	606	08-Jun-2012	Hymenoptera	Braconidae	Dinotrema	Kate Perez	BIN Taxonomy Match	June
GMTPE	GMGRC	GMGRC2224-13	Specimen on BOLD	BIOUG05482-C03	bayw.5	BOLD:AAA7636	BIN on BOLD	BIOUG05482-C03	591	08-Jun-2012	Hymenoptera	Braconidae	Dinotrema	Kate Perez	BIN Taxonomy Match	June
GMTPE	GMGRC	GMGRC2244-13	Specimen on BOLD	BIOUG05482-D11	bayw.5	BOLD:AAA7636	BIN on BOLD	BIOUG05482-D11	600	08-Jun-2012	Hymenoptera	Braconidae	Dinotrema	Kate Perez	BIN Taxonomy Match	June
GMTPE	GMGRC	GMGRC2261-13	Specimen on BOLD	BIOUG05482-F04	bayw.5	BOLD:AAA7636	BIN on BOLD	BIOUG05482-F04	564	08-Jun-2012	Hymenoptera	Braconidae	Dinotrema	Kate Perez	BIN Taxonomy Match	June
GMTPE	GMGRC	GMGRC888-13	Specimen on BOLD	BIOUG05394-B03	bayw.5	BOLD:AAA7636	BIN on BOLD	BIOUG05394-B03	579	08-Jun-2012	Hymenoptera	Braconidae	Dinotrema	Kate Perez	BIN Taxonomy Match	June
GMTPE	GMGRC	GMGRC918-13	Specimen on BOLD	BIOUG05394-D09	bayw.5	BOLD:AAA7636	BIN on BOLD	BIOUG05394-D09	591	08-Jun-2012	Hymenoptera	Braconidae	Dinotrema	Kate Perez	BIN Taxonomy Match	June
GMTPE	GMGRC	GMGRC931-13	Specimen on BOLD	BIOUG05394-E10	bayw.5	BOLD:AAA7636	BIN on BOLD	BIOUG05394-E10	564	08-Jun-2012	Hymenoptera	Braconidae	Dinotrema	Kate Perez	BIN Taxonomy Match	June
GMTPE	GMGRC	GMGRC951-13	Specimen on BOLD	BIOUG05394-G06	bayw.5	BOLD:AAA7636	BIN on BOLD	BIOUG05394-G06	579	08-Jun-2012	Hymenoptera	Braconidae	Dinotrema	Kate Perez	BIN Taxonomy Match	June
GMTPE	GMGRD	GMGRD1888-13	Specimen on BOLD	BIOUG05883-F05	bayw.7	BOLD:AAA7636	BIN on BOLD	BIOUG05883-F05	633	20-Jun-2012	Hymenoptera	Braconidae	Dinotrema	Kate Perez	BIN Taxonomy Match	June
GMTPE	GMGRD	GMGRD1893-13	Specimen on BOLD	BIOUG05883-F10	bayw.7	BOLD:AAA7636	BIN on BOLD	BIOUG05883-F10	619	20-Jun-2012	Hymenoptera	Braconidae	Dinotrema	Kate Perez	BIN Taxonomy Match	June
GMTPE	GMGRD	GMGRD1908-13	Specimen on BOLD	BIOUG05883-H01	bayw.7	BOLD:AAA7636	BIN on BOLD	BIOUG05883-H01	615	20-Jun-2012	Hymenoptera	Braconidae	Dinotrema	Kate Perez	BIN Taxonomy Match	June
GMTPE	GMGRD	GMGRD3163-13	Specimen on BOLD	BIOUG06059-A10	bayw.7	BOLD:AAA7636	BIN on BOLD	BIOUG06059-A10	583	20-Jun-2012	Hymenoptera	Braconidae	Dinotrema	Kate Perez	BIN Taxonomy Match	June
GMTPE	GMGRD	GMGRD3202-13	Specimen on BOLD	BIOUG06059-E01	bayw.7	BOLD:AAA7636	BIN on BOLD	BIOUG06059-E01	592	20-Jun-2012	Hymenoptera	Braconidae	Dinotrema	Kate Perez	BIN Taxonomy Match	June
GMTPZ	GMGMN	GMGMN914-14	Specimen on BOLD	BIOUG17442-F12	GMP#06029	BOLD:AAA7795	BIN on BOLD	BIOUG17442-F12	570	29-Jul-2014	Hymenoptera	Braconidae	Aleiodes	Kate Perez	BOLD ID Engine Manual	July
GMTPZ	GMGMD	GMGMD594-14	Specimen on BOLD	BIOUG16611-E10	GMP#06018	BOLD:AAA7796	BIN on BOLD	BIOUG16611-E10	576	16-Sep-2013	Hymenoptera	Braconidae	Aleiodes	Kate Perez	BOLD ID Engine Manual	September
GMTPZ	GMGMJ	GMGMJ1444-14	Specimen on BOLD	BIOUG17099-A12	GMP#06025	BOLD:AAA7890	BIN on BOLD	BIOUG17099-A12	585	02-Jun-2014	Hymenoptera	Braconidae	Microgaster	Kate Perez	BIN Taxonomy Match	June
GMTPZ	GMGMA	GMGMA400-14	Specimen on BOLD	BIOUG16209-B01	GMP#06015	BOLD:AAA8356	BIN on BOLD	BIOUG16209-B01	608	25-Jul-2013	Hymenoptera	Megachilidae	Megachile	Kate Perez	BIN Taxonomy Match	July
GMTPZ	GMGMK	GMGMK152-14	Specimen on BOLD	BIOUG17173-G01	GMP#06026	BOLD:AAA8356	BIN on BOLD	BIOUG17173-G01	567	17-Jun-2014	Hymenoptera	Megachilidae	Megachile	Kate Perez	BIN Taxonomy Match	June
GMTPZ	GMGML	GMGML1428-14	Specimen on BOLD	BIOUG17271-E05	GMP#06027	BOLD:AAA8356	BIN on BOLD	BIOUG17271-E05	582	01-Jul-2014	Hymenoptera	Megachilidae	Megachile	Kate Perez	BIN Taxonomy Match	July
GMTPZ	GMGML	GMGML202-14	Specimen on BOLD	BIOUG17230-A08	GMP#06027	BOLD:AAA8356	BIN on BOLD	BIOUG17230-A08	588	01-Jul-2014	Hymenoptera	Megachilidae	Megachile	Kate Perez	BIN Taxonomy Match	July
GMTPZ	GMGMA	GMGMA1228-14	Specimen on BOLD	BIOUG16217-G09	GMP#06015	BOLD:AAA9379	BIN on BOLD	BIOUG16217-G09	624	25-Jul-2013	Hymenoptera	Braconidae	Cotesia	Kate Perez	BIN Taxonomy Match	July
GMTPZ	GMGMC	GMGMC441-14	Specimen on BOLD	BIOUG16359-G07	GMP#06016	BOLD:AAA9379	BIN on BOLD	BIOUG16359-G07	564	08-Aug-2013	Hymenoptera	Braconidae	Cotesia	Kate Perez	BIN Taxonomy Match	August
GMTPZ	GMGMB	GMGMB855-14	Specimen on BOLD	BIOUG16276-F10	GMP#06017	BOLD:AAA9386	BIN on BOLD	BIOUG16276-F10	585	26-Aug-2013	Hymenoptera	Braconidae	Cotesia	Kate Perez	BIN Taxonomy Match	August
GMTPZ	GMGMC	GMGMC994-14	Specimen on BOLD	BIOUG16524-C03	GMP#06016	BOLD:AAA9386	BIN on BOLD	BIOUG16524-C03	600	08-Aug-2013	Hymenoptera	Braconidae	Cotesia	Kate Perez	BIN Taxonomy Match	August
GMTPZ	GMGMN	GMGMN1547-14	Specimen on BOLD	BIOUG17467-D04	GMP#06029	BOLD:AAA9506	BIN on BOLD	BIOUG17467-D04	576	29-Jul-2014	Hymenoptera	Ichneumonidae	Acrotomus	Kate Perez	BOLD ID Engine Manual	July
GMTPZ	GMGMK	GMGMK361-14	Specimen on BOLD	BIOUG17175-H08	GMP#06026	BOLD:AAA9946	BIN on BOLD	BIOUG17175-H08	578	17-Jun-2014	Hymenoptera	Megachilidae	Anthidium	Kate Perez	BIN Taxonomy Match	June
GMTPZ	GMGMC	GMGMC1386-14	Specimen on BOLD	BIOUG16528-D03	GMP#06016	BOLD:AAB0096	BIN on BOLD	BIOUG16528-D03	594	08-Aug-2013	Hymenoptera	Braconidae	0	Kate Perez	BOLD ID Engine Manual	August
GMTPZ	GMGMA	GMGMA1125-14	Specimen on BOLD	BIOUG16216-G01	GMP#06015	BOLD:AAB0353	BIN on BOLD	BIOUG16216-G01	564	25-Jul-2013	Hymenoptera	Halictidae	Lasioglossum	Kate Perez	BIN Taxonomy Match	July
GMTPZ	GMGMA	GMGMA420-14	Specimen on BOLD	BIOUG16209-C09	GMP#06015	BOLD:AAB0353	BIN on BOLD	BIOUG16209-C09	611	25-Jul-2013	Hymenoptera	Halictidae	Lasioglossum	Kate Perez	BIN Taxonomy Match	July
GMTPZ	GMGMA	GMGMA766-14	Specimen on BOLD	BIOUG16212-H10	GMP#06015	BOLD:AAB0353	BIN on BOLD	BIOUG16212-H10	534	25-Jul-2013	Hymenoptera	Halictidae	Lasioglossum	Kate Perez	BIN Taxonomy Match	July
GMTPZ	GMGMB	GMGMB1409-14	Specimen on BOLD	BIOUG16352-E06	GMP#06017	BOLD:AAB0353	BIN on BOLD	BIOUG16352-E06	594	26-Aug-2013	Hymenoptera	Halictidae	Lasioglossum	Kate Perez	BIN Taxonomy Match	August
GMTPZ	GMGMC	GMGMC658-14	Specimen on BOLD	BIOUG16520-A08	GMP#06016	BOLD:AAB0353	BIN on BOLD	BIOUG16520-A08	585	08-Aug-2013	Hymenoptera	Halictidae	Lasioglossum	Kate Perez	BIN Taxonomy Match	August
GMTPZ	GMGMD	GMGMD282-14	Specimen on BOLD	BIOUG16608-C07	GMP#06018	BOLD:AAB0353	BIN on BOLD	BIOUG16608-C07	588	16-Sep-2013	Hymenoptera	Halictidae	Lasioglossum	Kate Perez	BIN Taxonomy Match	September
GMTPZ	GMGMD	GMGMD315-14	Specimen on BOLD	BIOUG16608-F04	GMP#06018	BOLD:AAB0353	BIN on BOLD	BIOUG16608-F04	587	16-Sep-2013	Hymenoptera	Halictidae	Lasioglossum	Kate Perez	BIN Taxonomy Match	September
GMTPZ	GMGML	GMGML1444-14	Specimen on BOLD	BIOUG17271-F09	GMP#06027	BOLD:AAB0353	BIN on BOLD	BIOUG17271-F09	579	01-Jul-2014	Hymenoptera	Halictidae	Lasioglossum	Kate Perez	BIN Taxonomy Match	July
GMTPZ	GMGML	GMGML353-14	Specimen on BOLD	BIOUG17231-B11	GMP#06027	BOLD:AAB0353	BIN on BOLD	BIOUG17231-B11	588	01-Jul-2014	Hymenoptera	Halictidae	Lasioglossum	Kate Perez	BIN Taxonomy Match	July
GMTPZ	GMGML	GMGML407-14	Specimen on BOLD	BIOUG17231-G05	GMP#06027	BOLD:AAB0353	BIN on BOLD	BIOUG17231-G05	588	01-Jul-2014	Hymenoptera	Halictidae	Lasioglossum	Kate Perez	BIN Taxonomy Match	July
GMTPZ	GMGMM	GMGMM1050-14	Specimen on BOLD	BIOUG17374-G12	GMP#06028	BOLD:AAB0353	BIN on BOLD	BIOUG17374-G12	588	15-Jul-2014	Hymenoptera	Halictidae	Lasioglossum	Kate Perez	BIN Taxonomy Match	July
GMTPZ	GMGMM	GMGMM1155-14	Specimen on BOLD	BIOUG17375-H10	GMP#06028	BOLD:AAB0353	BIN on BOLD	BIOUG17375-H10	588	15-Jul-2014	Hymenoptera	Halictidae	Lasioglossum	Kate Perez	BIN Taxonomy Match	July
GMTPZ	GMGMM	GMGMM439-14	Specimen on BOLD	BIOUG17301-D07	GMP#06028	BOLD:AAB0353	BIN on BOLD	BIOUG17301-D07	588	15-Jul-2014	Hymenoptera	Halictidae	Lasioglossum	Kate Perez	BIN Taxonomy Match	July
GMTPZ	GMGMM	GMGMM455-14	Specimen on BOLD	BIOUG17301-E11	GMP#06028	BOLD:AAB0353	BIN on BOLD	BIOUG17301-E11	591	15-Jul-2014	Hymenoptera	Halictidae	Lasioglossum	Kate Perez	BIN Taxonomy Match	July
GMTPZ	GMGMM	GMGMM473-14	Specimen on BOLD	BIOUG17301-G05	GMP#06028	BOLD:AAB0353	BIN on BOLD	BIOUG17301-G05	588	15-Jul-2014	Hymenoptera	Halictidae	Lasioglossum	Kate Perez	BIN Taxonomy Match	July
GMTPZ	GMGMM	GMGMM476-14	Specimen on BOLD	BIOUG17301-G08	GMP#06028	BOLD:AAB0353	BIN on BOLD	BIOUG17301-G08	594	15-Jul-2014	Hymenoptera	Halictidae	Lasioglossum	Kate Perez	BIN Taxonomy Match	July
GMTPZ	GMGMM	GMGMM490-14	Specimen on BOLD	BIOUG17301-H10	GMP#06028	BOLD:AAB0353	BIN on BOLD	BIOUG17301-H10	552	15-Jul-2014	Hymenoptera	Halictidae	Lasioglossum	Kate Perez	BIN Taxonomy Match	July
GMTPZ	GMGMN	GMGMN1400-14	Specimen on BOLD	BIOUG17447-G11	GMP#06029	BOLD:AAB0353	BIN on BOLD	BIOUG17447-G11	588	29-Jul-2014	Hymenoptera	Ichneumonidae	Acrotomus	Kate Perez	BOLD ID Engine Manual	July
GMTPZ	GMGMN	GMGMN1430-14	Specimen on BOLD	BIOUG17466-B06	GMP#06029	BOLD:AAB0373	BIN on BOLD	BIOUG17466-B06	538	29-Jul-2014	Hymenoptera	Ichneumonidae	Acrotomus	Kate Perez	BOLD ID Engine Manual	July
GMTPZ	GMGMN	GMGMN1431-14	Specimen on BOLD	BIOUG17466-B07	GMP#06029	BOLD:AAB0373	BIN on BOLD	BIOUG17466-B07	588	29-Jul-2014	Hymenoptera	Ichneumonidae	Acrotomus	Kate Perez	BOLD ID Engine Manual	July
GMTPZ	GMGMN	GMGMN1432-14	Specimen on BOLD	BIOUG17466-B08	GMP#06029	BOLD:AAB0373	BIN on BOLD	BIOUG17466-B08	563	29-Jul-2014	Hymenoptera	Ichneumonidae	Acrotomus	Kate Perez	BOLD ID Engine Manual	July
GMTPZ	GMGMN	GMGMN1433-14	Specimen on BOLD	BIOUG17466-B09	GMP#06029	BOLD:AAB0373	BIN on BOLD	BIOUG17466-B09	588	29-Jul-2014	Hymenoptera	Ichneumonidae	Acrotomus	Kate Perez	BOLD ID Engine Manual	July
GMTPZ	GMGMA	GMGMA539-14	Specimen on BOLD	BIOUG16210-E09	GMP#06015	BOLD:AAB1060	BIN on BOLD	BIOUG16210-E09	550	25-Jul-2013	Hymenoptera	Apidae	Bombus	Kate Perez	BIN Taxonomy Match	July
GMTPZ	GMGMA	GMGMA546-14	Specimen on BOLD	BIOUG16210-F04	GMP#06015	BOLD:AAB1060	BIN on BOLD	BIOUG16210-F04	564	25-Jul-2013	Hymenoptera	Apidae	Bombus	Kate Perez	BIN Taxonomy Match	July
GMTPZ	GMGMB	GMGMB516-14	Specimen on BOLD	BIOUG16273-B04	GMP#06017	BOLD:AAB1060	BIN on BOLD	BIOUG16273-B04	554	26-Aug-2013	Hymenoptera	Apidae	Bombus	Kate Perez	BIN Taxonomy Match	August
GMTPZ	GMGMC	GMGMC140-14	Specimen on BOLD	BIOUG16356-A05	GMP#06016	BOLD:AAB1060	BIN on BOLD	BIOUG16356-A05	579	08-Aug-2013	Hymenoptera	Apidae	Bombus	Kate Perez	BIN Taxonomy Match	August
GMTPZ	GMGMC	GMGMC141-14	Specimen on BOLD	BIOUG16356-A06	GMP#06016	BOLD:AAB1060	BIN on BOLD	BIOUG16356-A06	579	08-Aug-2013	Hymenoptera	Apidae	Bombus	Kate Perez	BIN Taxonomy Match	August
GMTPZ	GMGMC	GMGMC145-14	Specimen on BOLD	BIOUG16356-A10	GMP#06016	BOLD:AAB1060	BIN on BOLD	BIOUG16356-A10	588	08-Aug-2013	Hymenoptera	Apidae	Bombus	Kate Perez	BIN Taxonomy Match	August
GMTPZ	GMGMC	GMGMC152-14	Specimen on BOLD	BIOUG16356-B05	GMP#06016	BOLD:AAB1060	BIN on BOLD	BIOUG16356-B05	588	08-Aug-2013	Hymenoptera	Apidae	Bombus	Kate Perez	BIN Taxonomy Match	August
GMTPZ	GMGMC	GMGMC162-14	Specimen on BOLD	BIOUG16356-C03	GMP#06016	BOLD:AAB1060	BIN on BOLD	BIOUG16356-C03	579	08-Aug-2013	Hymenoptera	Apidae	Bombus	Kate Perez	BIN Taxonomy Match	August
GMTPZ	GMGMC	GMGMC196-14	Specimen on BOLD	BIOUG16356-F01	GMP#06016	BOLD:AAB1060	BIN on BOLD	BIOUG16356-F01	579	08-Aug-2013	Hymenoptera	Apidae	Bombus	Kate Perez	BIN Taxonomy Match	August
GMTPZ	GMGMC	GMGMC212-14	Specimen on BOLD	BIOUG16356-G05	GMP#06016	BOLD:AAB1060	BIN on BOLD	BIOUG16356-G05	567	08-Aug-2013	Hymenoptera	Apidae	Bombus	Kate Perez	BIN Taxonomy Match	August
GMTPZ	GMGMD	GMGMD159-14	Specimen on BOLD	BIOUG16607-A03	GMP#06018	BOLD:AAB1060	BIN on BOLD	BIOUG16607-A03	574	16-Sep-2013	Hymenoptera	Apidae	Bombus	Kate Perez	BIN Taxonomy Match	September
GMTPZ	GMGMI	GMGMI051-14	Specimen on BOLD	BIOUG17084-D10	GMP#06024	BOLD:AAB1060	BIN on BOLD	BIOUG17084-D10	549	16-May-2014	Hymenoptera	Apidae	Bombus	Kate Perez	BIN Taxonomy Match	May
GMTPZ	GMGMJ	GMGMJ077-14	Specimen on BOLD	BIOUG17068-E08	GMP#06025	BOLD:AAB1060	BIN on BOLD	BIOUG17068-E08	579	02-Jun-2014	Hymenoptera	Apidae	Bombus	Kate Perez	BIN Taxonomy Match	June
GMTPZ	GMGMJ	GMGMJ089-14	Specimen on BOLD	BIOUG17068-F08	GMP#06025	BOLD:AAB1060	BIN on BOLD	BIOUG17068-F08	579	02-Jun-2014	Hymenoptera	Apidae	Bombus	Kate Perez	BIN Taxonomy Match	June
GMTPZ	GMGMJ	GMGMJ097-14	Specimen on BOLD	BIOUG17068-G04	GMP#06025	BOLD:AAB1060	BIN on BOLD	BIOUG17068-G04	579	02-Jun-2014	Hymenoptera	Apidae	Bombus	Kate Perez	BIN Taxonomy Match	June
GMTPZ	GMGMK	GMGMK088-14	Specimen on BOLD	BIOUG17173-A09	GMP#06026	BOLD:AAB1060	BIN on BOLD	BIOUG17173-A09	543	17-Jun-2014	Hymenoptera	Apidae	Bombus	Kate Perez	BIN Taxonomy Match	June
GMTPZ	GMGMK	GMGMK090-14	Specimen on BOLD	BIOUG17173-A11	GMP#06026	BOLD:AAB1060	BIN on BOLD	BIOUG17173-A11	533	17-Jun-2014	Hymenoptera	Apidae	Bombus	Kate Perez	BIN Taxonomy Match	June
GMTPZ	GMGMK	GMGMK104-14	Specimen on BOLD	BIOUG17173-C01	GMP#06026	BOLD:AAB1060	BIN on BOLD	BIOUG17173-C01	546	17-Jun-2014	Hymenoptera	Apidae	Bombus	Kate Perez	BIN Taxonomy Match	June
GMTPZ	GMGMK	GMGMK108-14	Specimen on BOLD	BIOUG17173-C05	GMP#06026	BOLD:AAB1060	BIN on BOLD	BIOUG17173-C05	588	17-Jun-2014	Hymenoptera	Apidae	Bombus	Kate Perez	BIN Taxonomy Match	June
GMTPZ	GMGML	GMGML104-14	Specimen on BOLD	BIOUG17229-A05	GMP#06027	BOLD:AAB1060	BIN on BOLD	BIOUG17229-A05	582	01-Jul-2014	Hymenoptera	Apidae	Bombus	Kate Perez	BIN Taxonomy Match	July
GMTPZ	GMGML	GMGML108-14	Specimen on BOLD	BIOUG17229-A09	GMP#06027	BOLD:AAB1060	BIN on BOLD	BIOUG17229-A09	540	01-Jul-2014	Hymenoptera	Apidae	Bombus	Kate Perez	BIN Taxonomy Match	July
GMTPZ	GMGML	GMGML152-14	Specimen on BOLD	BIOUG17229-E05	GMP#06027	BOLD:AAB1060	BIN on BOLD	BIOUG17229-E05	576	01-Jul-2014	Hymenoptera	Apidae	Bombus	Kate Perez	BIN Taxonomy Match	July
GMTPZ	GMGMM	GMGMM109-14	Specimen on BOLD	BIOUG17297-A12	GMP#06028	BOLD:AAB1060	BIN on BOLD	BIOUG17297-A12	595	15-Jul-2014	Hymenoptera	Apidae	Bombus	Kate Perez	BIN Taxonomy Match	July
GMTPZ	GMGMM	GMGMM112-14	Specimen on BOLD	BIOUG17297-B03	GMP#06028	BOLD:AAB1060	BIN on BOLD	BIOUG17297-B03	604	15-Jul-2014	Hymenoptera	Apidae	Bombus	Kate Perez	BIN Taxonomy Match	July
GMTPZ	GMGMM	GMGMM114-14	Specimen on BOLD	BIOUG17297-B05	GMP#06028	BOLD:AAB1060	BIN on BOLD	BIOUG17297-B05	552	15-Jul-2014	Hymenoptera	Apidae	Bombus	Kate Perez	BIN Taxonomy Match	July
GMTPZ	GMGMM	GMGMM134-14	Specimen on BOLD	BIOUG17297-D01	GMP#06028	BOLD:AAB1060	BIN on BOLD	BIOUG17297-D01	525	15-Jul-2014	Hymenoptera	Apidae	Bombus	Kate Perez	BIN Taxonomy Match	July
GMTPZ	GMGMM	GMGMM139-14	Specimen on BOLD	BIOUG17297-D06	GMP#06028	BOLD:AAB1060	BIN on BOLD	BIOUG17297-D06	546	15-Jul-2014	Hymenoptera	Apidae	Bombus	Kate Perez	BIN Taxonomy Match	July
GMTPZ	GMGMM	GMGMM147-14	Specimen on BOLD	BIOUG17297-E02	GMP#06028	BOLD:AAB1060	BIN on BOLD	BIOUG17297-E02	527	15-Jul-2014	Hymenoptera	Apidae	Bombus	Kate Perez	BIN Taxonomy Match	July
GMTPZ	GMGMM	GMGMM161-14	Specimen on BOLD	BIOUG17297-F04	GMP#06028	BOLD:AAB1060	BIN on BOLD	BIOUG17297-F04	623	15-Jul-2014	Hymenoptera	Apidae	Bombus	Kate Perez	BIN Taxonomy Match	July
GMTPZ	GMGMM	GMGMM191-14	Specimen on BOLD	BIOUG17297-H10	GMP#06028	BOLD:AAB1060	BIN on BOLD	BIOUG17297-H10	579	15-Jul-2014	Hymenoptera	Apidae	Bombus	Kate Perez	BIN Taxonomy Match	July
GMTPZ	GMGMN	GMGMN003-14	Specimen on BOLD	BIOUG17299-E03	GMP#06029	BOLD:AAB1060	BIN on BOLD	BIOUG17299-E03	540	29-Jul-2014	Hymenoptera	Apidae	Bombus	Kate Perez	BIN Taxonomy Match	July
GMTPZ	GMGMN	GMGMN004-14	Specimen on BOLD	BIOUG17299-E04	GMP#06029	BOLD:AAB1060	BIN on BOLD	BIOUG17299-E04	555	29-Jul-2014	Hymenoptera	Apidae	Bombus	Kate Perez	BIN Taxonomy Match	July
GMTPZ	GMGMN	GMGMN005-14	Specimen on BOLD	BIOUG17299-E05	GMP#06029	BOLD:AAB1060	BIN on BOLD	BIOUG17299-E05	516	29-Jul-2014	Hymenoptera	Apidae	Bombus	Kate Perez	BIN Taxonomy Match	July
GMTPZ	GMGMN	GMGMN006-14	Specimen on BOLD	BIOUG17299-E06	GMP#06029	BOLD:AAB1060	BIN on BOLD	BIOUG17299-E06	609	29-Jul-2014	Hymenoptera	Apidae	Bombus	Kate Perez	BIN Taxonomy Match	July
GMTPZ	GMGMN	GMGMN008-14	Specimen on BOLD	BIOUG17299-E08	GMP#06029	BOLD:AAB1060	BIN on BOLD	BIOUG17299-E08	600	29-Jul-2014	Hymenoptera	Apidae	Bombus	Kate Perez	BIN Taxonomy Match	July
GMTPZ	GMGMN	GMGMN009-14	Specimen on BOLD	BIOUG17299-E09	GMP#06029	BOLD:AAB1060	BIN on BOLD	BIOUG17299-E09	609	29-Jul-2014	Hymenoptera	Apidae	Bombus	Kate Perez	BIN Taxonomy Match	July
GMTPZ	GMGMN	GMGMN013-14	Specimen on BOLD	BIOUG17299-F01	GMP#06029	BOLD:AAB1060	BIN on BOLD	BIOUG17299-F01	555	29-Jul-2014	Hymenoptera	Apidae	Bombus	Kate Perez	BIN Taxonomy Match	July
GMTPZ	GMGMN	GMGMN016-14	Specimen on BOLD	BIOUG17299-F04	GMP#06029	BOLD:AAB1060	BIN on BOLD	BIOUG17299-F04	576	29-Jul-2014	Hymenoptera	Apidae	Bombus	Kate Perez	BIN Taxonomy Match	July
GMTPZ	GMGMN	GMGMN026-14	Specimen on BOLD	BIOUG17299-G02	GMP#06029	BOLD:AAB1060	BIN on BOLD	BIOUG17299-G02	588	29-Jul-2014	Hymenoptera	Apidae	Bombus	Kate Perez	BIN Taxonomy Match	July
GMTPZ	GMGMN	GMGMN027-14	Specimen on BOLD	BIOUG17299-G03	GMP#06029	BOLD:AAB1060	BIN on BOLD	BIOUG17299-G03	564	29-Jul-2014	Hymenoptera	Apidae	Bombus	Kate Perez	BIN Taxonomy Match	July
GMTPZ	GMGMN	GMGMN030-14	Specimen on BOLD	BIOUG17299-G06	GMP#06029	BOLD:AAB1060	BIN on BOLD	BIOUG17299-G06	603	29-Jul-2014	Hymenoptera	Apidae	Bombus	Kate Perez	BIN Taxonomy Match	July
GMTPZ	GMGMN	GMGMN035-14	Specimen on BOLD	BIOUG17299-G11	GMP#06029	BOLD:AAB1060	BIN on BOLD	BIOUG17299-G11	579	29-Jul-2014	Hymenoptera	Apidae	Bombus	Kate Perez	BIN Taxonomy Match	July
GMTPZ	GMGMN	GMGMN036-14	Specimen on BOLD	BIOUG17299-G12	GMP#06029	BOLD:AAB1060	BIN on BOLD	BIOUG17299-G12	552	29-Jul-2014	Hymenoptera	Apidae	Bombus	Kate Perez	BIN Taxonomy Match	July
GMTPZ	GMGMN	GMGMN042-14	Specimen on BOLD	BIOUG17299-H06	GMP#06029	BOLD:AAB1060	BIN on BOLD	BIOUG17299-H06	582	29-Jul-2014	Hymenoptera	Apidae	Bombus	Kate Perez	BIN Taxonomy Match	July
GMTPZ	GMGMN	GMGMN044-14	Specimen on BOLD	BIOUG17299-H08	GMP#06029	BOLD:AAB1060	BIN on BOLD	BIOUG17299-H08	554	29-Jul-2014	Hymenoptera	Apidae	Bombus	Kate Perez	BIN Taxonomy Match	July
GMTPZ	GMGMN	GMGMN045-14	Specimen on BOLD	BIOUG17299-H09	GMP#06029	BOLD:AAB1060	BIN on BOLD	BIOUG17299-H09	576	29-Jul-2014	Hymenoptera	Apidae	Bombus	Kate Perez	BIN Taxonomy Match	July
GMTPZ	GMGMN	GMGMN147-14	Specimen on BOLD	BIOUG17382-A01	GMP#06029	BOLD:AAB1060	BIN on BOLD	BIOUG17382-A01	579	29-Jul-2014	Hymenoptera	Apidae	Bombus	Kate Perez	BIN Taxonomy Match	July
GMTPZ	GMGMN	GMGMN150-14	Specimen on BOLD	BIOUG17382-A04	GMP#06029	BOLD:AAB1060	BIN on BOLD	BIOUG17382-A04	588	29-Jul-2014	Hymenoptera	Apidae	Bombus	Kate Perez	BIN Taxonomy Match	July
GMTPZ	GMGMN	GMGMN153-14	Specimen on BOLD	BIOUG17382-A07	GMP#06029	BOLD:AAB1060	BIN on BOLD	BIOUG17382-A07	579	29-Jul-2014	Hymenoptera	Apidae	Bombus	Kate Perez	BIN Taxonomy Match	July
GMTPZ	GMGMN	GMGMN166-14	Specimen on BOLD	BIOUG17382-B08	GMP#06029	BOLD:AAB1060	BIN on BOLD	BIOUG17382-B08	588	29-Jul-2014	Hymenoptera	Apidae	Bombus	Kate Perez	BIN Taxonomy Match	July
GMTPZ	GMGMN	GMGMN193-14	Specimen on BOLD	BIOUG17382-D11	GMP#06029	BOLD:AAB1060	BIN on BOLD	BIOUG17382-D11	588	29-Jul-2014	Hymenoptera	Apidae	Bombus	Kate Perez	BIN Taxonomy Match	July
GMTPZ	GMGMN	GMGMN194-14	Specimen on BOLD	BIOUG17382-D12	GMP#06029	BOLD:AAB1060	BIN on BOLD	BIOUG17382-D12	576	29-Jul-2014	Hymenoptera	Apidae	Bombus	Kate Perez	BIN Taxonomy Match	July
GMTPZ	GMGMA	GMGMA388-14	Specimen on BOLD	BIOUG16209-A01	GMP#06015	BOLD:AAB1062	BIN on BOLD	BIOUG16209-A01	610	25-Jul-2013	Hymenoptera	Apidae	Bombus	Kate Perez	BIN Taxonomy Match	July
GMTPZ	GMGMA	GMGMA391-14	Specimen on BOLD	BIOUG16209-A04	GMP#06015	BOLD:AAB1062	BIN on BOLD	BIOUG16209-A04	610	25-Jul-2013	Hymenoptera	Apidae	Bombus	Kate Perez	BIN Taxonomy Match	July
GMTPZ	GMGMA	GMGMA392-14	Specimen on BOLD	BIOUG16209-A05	GMP#06015	BOLD:AAB1062	BIN on BOLD	BIOUG16209-A05	603	25-Jul-2013	Hymenoptera	Apidae	Bombus	Kate Perez	BIN Taxonomy Match	July
GMTPZ	GMGMA	GMGMA462-14	Specimen on BOLD	BIOUG16209-G03	GMP#06015	BOLD:AAB1062	BIN on BOLD	BIOUG16209-G03	542	25-Jul-2013	Hymenoptera	Apidae	Bombus	Kate Perez	BIN Taxonomy Match	July
GMTPZ	GMGMA	GMGMA464-14	Specimen on BOLD	BIOUG16209-G05	GMP#06015	BOLD:AAB1062	BIN on BOLD	BIOUG16209-G05	540	25-Jul-2013	Hymenoptera	Apidae	Bombus	Kate Perez	BIN Taxonomy Match	July
GMTPZ	GMGMA	GMGMA470-14	Specimen on BOLD	BIOUG16209-G11	GMP#06015	BOLD:AAB1062	BIN on BOLD	BIOUG16209-G11	605	25-Jul-2013	Hymenoptera	Apidae	Bombus	Kate Perez	BIN Taxonomy Match	July
GMTPZ	GMGMA	GMGMA592-14	Specimen on BOLD	BIOUG16211-B03	GMP#06015	BOLD:AAB1062	BIN on BOLD	BIOUG16211-B03	611	25-Jul-2013	Hymenoptera	Apidae	Bombus	Kate Perez	BIN Taxonomy Match	July
GMTPZ	GMGMB	GMGMB501-14	Specimen on BOLD	BIOUG16273-A01	GMP#06017	BOLD:AAB1062	BIN on BOLD	BIOUG16273-A01	564	26-Aug-2013	Hymenoptera	Apidae	Bombus	Kate Perez	BIN Taxonomy Match	August
GMTPZ	GMGMB	GMGMB512-14	Specimen on BOLD	BIOUG16273-A12	GMP#06017	BOLD:AAB1062	BIN on BOLD	BIOUG16273-A12	594	26-Aug-2013	Hymenoptera	Apidae	Bombus	Kate Perez	BIN Taxonomy Match	August
GMTPZ	GMGMB	GMGMB520-14	Specimen on BOLD	BIOUG16273-B08	GMP#06017	BOLD:AAB1062	BIN on BOLD	BIOUG16273-B08	555	26-Aug-2013	Hymenoptera	Apidae	Bombus	Kate Perez	BIN Taxonomy Match	August
GMTPZ	GMGMB	GMGMB522-14	Specimen on BOLD	BIOUG16273-B10	GMP#06017	BOLD:AAB1062	BIN on BOLD	BIOUG16273-B10	537	26-Aug-2013	Hymenoptera	Apidae	Bombus	Kate Perez	BIN Taxonomy Match	August
GMTPZ	GMGMB	GMGMB535-14	Specimen on BOLD	BIOUG16273-C11	GMP#06017	BOLD:AAB1062	BIN on BOLD	BIOUG16273-C11	576	26-Aug-2013	Hymenoptera	Apidae	Bombus	Kate Perez	BIN Taxonomy Match	August
GMTPZ	GMGMB	GMGMB536-14	Specimen on BOLD	BIOUG16273-C12	GMP#06017	BOLD:AAB1062	BIN on BOLD	BIOUG16273-C12	546	26-Aug-2013	Hymenoptera	Apidae	Bombus	Kate Perez	BIN Taxonomy Match	August
GMTPZ	GMGMB	GMGMB538-14	Specimen on BOLD	BIOUG16273-D02	GMP#06017	BOLD:AAB1062	BIN on BOLD	BIOUG16273-D02	588	26-Aug-2013	Hymenoptera	Apidae	Bombus	Kate Perez	BIN Taxonomy Match	August
GMTPZ	GMGMB	GMGMB544-14	Specimen on BOLD	BIOUG16273-D08	GMP#06017	BOLD:AAB1062	BIN on BOLD	BIOUG16273-D08	588	26-Aug-2013	Hymenoptera	Apidae	Bombus	Kate Perez	BIN Taxonomy Match	August
GMTPZ	GMGMB	GMGMB545-14	Specimen on BOLD	BIOUG16273-D09	GMP#06017	BOLD:AAB1062	BIN on BOLD	BIOUG16273-D09	594	26-Aug-2013	Hymenoptera	Apidae	Bombus	Kate Perez	BIN Taxonomy Match	August
GMTPZ	GMGMB	GMGMB549-14	Specimen on BOLD	BIOUG16273-E01	GMP#06017	BOLD:AAB1062	BIN on BOLD	BIOUG16273-E01	576	26-Aug-2013	Hymenoptera	Apidae	Bombus	Kate Perez	BIN Taxonomy Match	August
GMTPZ	GMGMB	GMGMB553-14	Specimen on BOLD	BIOUG16273-E05	GMP#06017	BOLD:AAB1062	BIN on BOLD	BIOUG16273-E05	576	26-Aug-2013	Hymenoptera	Apidae	Bombus	Kate Perez	BIN Taxonomy Match	August
GMTPZ	GMGMB	GMGMB555-14	Specimen on BOLD	BIOUG16273-E07	GMP#06017	BOLD:AAB1062	BIN on BOLD	BIOUG16273-E07	567	26-Aug-2013	Hymenoptera	Apidae	Bombus	Kate Perez	BIN Taxonomy Match	August
GMTPZ	GMGMB	GMGMB556-14	Specimen on BOLD	BIOUG16273-E08	GMP#06017	BOLD:AAB1062	BIN on BOLD	BIOUG16273-E08	594	26-Aug-2013	Hymenoptera	Apidae	Bombus	Kate Perez	BIN Taxonomy Match	August
GMTPZ	GMGMB	GMGMB558-14	Specimen on BOLD	BIOUG16273-E10	GMP#06017	BOLD:AAB1062	BIN on BOLD	BIOUG16273-E10	567	26-Aug-2013	Hymenoptera	Apidae	Bombus	Kate Perez	BIN Taxonomy Match	August
GMTPZ	GMGMC	GMGMC136-14	Specimen on BOLD	BIOUG16356-A01	GMP#06016	BOLD:AAB1062	BIN on BOLD	BIOUG16356-A01	546	08-Aug-2013	Hymenoptera	Apidae	Bombus	Kate Perez	BIN Taxonomy Match	August
GMTPZ	GMGMC	GMGMC137-14	Specimen on BOLD	BIOUG16356-A02	GMP#06016	BOLD:AAB1062	BIN on BOLD	BIOUG16356-A02	579	08-Aug-2013	Hymenoptera	Apidae	Bombus	Kate Perez	BIN Taxonomy Match	August
GMTPZ	GMGMC	GMGMC138-14	Specimen on BOLD	BIOUG16356-A03	GMP#06016	BOLD:AAB1062	BIN on BOLD	BIOUG16356-A03	534	08-Aug-2013	Hymenoptera	Apidae	Bombus	Kate Perez	BIN Taxonomy Match	August
GMTPZ	GMGMC	GMGMC143-14	Specimen on BOLD	BIOUG16356-A08	GMP#06016	BOLD:AAB1062	BIN on BOLD	BIOUG16356-A08	585	08-Aug-2013	Hymenoptera	Apidae	Bombus	Kate Perez	BIN Taxonomy Match	August
GMTPZ	GMGMC	GMGMC144-14	Specimen on BOLD	BIOUG16356-A09	GMP#06016	BOLD:AAB1062	BIN on BOLD	BIOUG16356-A09	558	08-Aug-2013	Hymenoptera	Apidae	Bombus	Kate Perez	BIN Taxonomy Match	August
GMTPZ	GMGMC	GMGMC153-14	Specimen on BOLD	BIOUG16356-B06	GMP#06016	BOLD:AAB1062	BIN on BOLD	BIOUG16356-B06	591	08-Aug-2013	Hymenoptera	Apidae	Bombus	Kate Perez	BIN Taxonomy Match	August
GMTPZ	GMGMC	GMGMC165-14	Specimen on BOLD	BIOUG16356-C06	GMP#06016	BOLD:AAB1062	BIN on BOLD	BIOUG16356-C06	579	08-Aug-2013	Hymenoptera	Apidae	Bombus	Kate Perez	BIN Taxonomy Match	August
GMTPZ	GMGMC	GMGMC197-14	Specimen on BOLD	BIOUG16356-F02	GMP#06016	BOLD:AAB1062	BIN on BOLD	BIOUG16356-F02	588	08-Aug-2013	Hymenoptera	Apidae	Bombus	Kate Perez	BIN Taxonomy Match	August
GMTPZ	GMGMC	GMGMC198-14	Specimen on BOLD	BIOUG16356-F03	GMP#06016	BOLD:AAB1062	BIN on BOLD	BIOUG16356-F03	594	08-Aug-2013	Hymenoptera	Apidae	Bombus	Kate Perez	BIN Taxonomy Match	August
GMTPZ	GMGMC	GMGMC200-14	Specimen on BOLD	BIOUG16356-F05	GMP#06016	BOLD:AAB1062	BIN on BOLD	BIOUG16356-F05	563	08-Aug-2013	Hymenoptera	Apidae	Bombus	Kate Perez	BIN Taxonomy Match	August
GMTPZ	GMGMC	GMGMC203-14	Specimen on BOLD	BIOUG16356-F08	GMP#06016	BOLD:AAB1062	BIN on BOLD	BIOUG16356-F08	600	08-Aug-2013	Hymenoptera	Apidae	Bombus	Kate Perez	BIN Taxonomy Match	August
GMTPZ	GMGMC	GMGMC204-14	Specimen on BOLD	BIOUG16356-F09	GMP#06016	BOLD:AAB1062	BIN on BOLD	BIOUG16356-F09	594	08-Aug-2013	Hymenoptera	Apidae	Bombus	Kate Perez	BIN Taxonomy Match	August
GMTPZ	GMGMC	GMGMC209-14	Specimen on BOLD	BIOUG16356-G02	GMP#06016	BOLD:AAB1062	BIN on BOLD	BIOUG16356-G02	555	08-Aug-2013	Hymenoptera	Apidae	Bombus	Kate Perez	BIN Taxonomy Match	August
GMTPZ	GMGMC	GMGMC211-14	Specimen on BOLD	BIOUG16356-G04	GMP#06016	BOLD:AAB1062	BIN on BOLD	BIOUG16356-G04	597	08-Aug-2013	Hymenoptera	Apidae	Bombus	Kate Perez	BIN Taxonomy Match	August
GMTPZ	GMGMC	GMGMC221-14	Specimen on BOLD	BIOUG16356-H02	GMP#06016	BOLD:AAB1062	BIN on BOLD	BIOUG16356-H02	585	08-Aug-2013	Hymenoptera	Apidae	Bombus	Kate Perez	BIN Taxonomy Match	August
GMTPZ	GMGMC	GMGMC224-14	Specimen on BOLD	BIOUG16356-H05	GMP#06016	BOLD:AAB1062	BIN on BOLD	BIOUG16356-H05	579	08-Aug-2013	Hymenoptera	Apidae	Bombus	Kate Perez	BIN Taxonomy Match	August
GMTPZ	GMGMD	GMGMD160-14	Specimen on BOLD	BIOUG16607-A04	GMP#06018	BOLD:AAB1062	BIN on BOLD	BIOUG16607-A04	588	16-Sep-2013	Hymenoptera	Apidae	Bombus	Kate Perez	BIN Taxonomy Match	September
GMTPZ	GMGMI	GMGMI029-14	Specimen on BOLD	BIOUG17084-B12	GMP#06024	BOLD:AAB1062	BIN on BOLD	BIOUG17084-B12	594	16-May-2014	Hymenoptera	Apidae	Bombus	Kate Perez	BIN Taxonomy Match	May
GMTPZ	GMGMI	GMGMI065-14	Specimen on BOLD	BIOUG17084-E12	GMP#06024	BOLD:AAB1062	BIN on BOLD	BIOUG17084-E12	537	16-May-2014	Hymenoptera	Apidae	Bombus	Kate Perez	BIN Taxonomy Match	May
GMTPZ	GMGMJ	GMGMJ098-14	Specimen on BOLD	BIOUG17068-G05	GMP#06025	BOLD:AAB1062	BIN on BOLD	BIOUG17068-G05	588	02-Jun-2014	Hymenoptera	Apidae	Bombus	Kate Perez	BIN Taxonomy Match	June
GMTPZ	GMGMK	GMGMK080-14	Specimen on BOLD	BIOUG17173-A01	GMP#06026	BOLD:AAB1062	BIN on BOLD	BIOUG17173-A01	579	17-Jun-2014	Hymenoptera	Apidae	Bombus	Kate Perez	BIN Taxonomy Match	June
GMTPZ	GMGMK	GMGMK082-14	Specimen on BOLD	BIOUG17173-A03	GMP#06026	BOLD:AAB1062	BIN on BOLD	BIOUG17173-A03	534	17-Jun-2014	Hymenoptera	Apidae	Bombus	Kate Perez	BIN Taxonomy Match	June
GMTPZ	GMGMK	GMGMK085-14	Specimen on BOLD	BIOUG17173-A06	GMP#06026	BOLD:AAB1062	BIN on BOLD	BIOUG17173-A06	579	17-Jun-2014	Hymenoptera	Apidae	Bombus	Kate Perez	BIN Taxonomy Match	June
GMTPZ	GMGMK	GMGMK102-14	Specimen on BOLD	BIOUG17173-B11	GMP#06026	BOLD:AAB1062	BIN on BOLD	BIOUG17173-B11	576	17-Jun-2014	Hymenoptera	Apidae	Bombus	Kate Perez	BIN Taxonomy Match	June
GMTPZ	GMGMK	GMGMK105-14	Specimen on BOLD	BIOUG17173-C02	GMP#06026	BOLD:AAB1062	BIN on BOLD	BIOUG17173-C02	588	17-Jun-2014	Hymenoptera	Apidae	Bombus	Kate Perez	BIN Taxonomy Match	June
GMTPZ	GMGMK	GMGMK106-14	Specimen on BOLD	BIOUG17173-C03	GMP#06026	BOLD:AAB1062	BIN on BOLD	BIOUG17173-C03	588	17-Jun-2014	Hymenoptera	Apidae	Bombus	Kate Perez	BIN Taxonomy Match	June
GMTPZ	GMGMK	GMGMK107-14	Specimen on BOLD	BIOUG17173-C04	GMP#06026	BOLD:AAB1062	BIN on BOLD	BIOUG17173-C04	564	17-Jun-2014	Hymenoptera	Apidae	Bombus	Kate Perez	BIN Taxonomy Match	June
GMTPZ	GMGMK	GMGMK112-14	Specimen on BOLD	BIOUG17173-C09	GMP#06026	BOLD:AAB1062	BIN on BOLD	BIOUG17173-C09	582	17-Jun-2014	Hymenoptera	Apidae	Bombus	Kate Perez	BIN Taxonomy Match	June
GMTPZ	GMGMK	GMGMK114-14	Specimen on BOLD	BIOUG17173-C11	GMP#06026	BOLD:AAB1062	BIN on BOLD	BIOUG17173-C11	579	17-Jun-2014	Hymenoptera	Apidae	Bombus	Kate Perez	BIN Taxonomy Match	June
GMTPZ	GMGML	GMGML100-14	Specimen on BOLD	BIOUG17229-A01	GMP#06027	BOLD:AAB1062	BIN on BOLD	BIOUG17229-A01	576	01-Jul-2014	Hymenoptera	Apidae	Bombus	Kate Perez	BIN Taxonomy Match	July
GMTPZ	GMGML	GMGML102-14	Specimen on BOLD	BIOUG17229-A03	GMP#06027	BOLD:AAB1062	BIN on BOLD	BIOUG17229-A03	561	01-Jul-2014	Hymenoptera	Apidae	Bombus	Kate Perez	BIN Taxonomy Match	July
GMTPZ	GMGML	GMGML105-14	Specimen on BOLD	BIOUG17229-A06	GMP#06027	BOLD:AAB1062	BIN on BOLD	BIOUG17229-A06	564	01-Jul-2014	Hymenoptera	Apidae	Bombus	Kate Perez	BIN Taxonomy Match	July
GMTPZ	GMGML	GMGML110-14	Specimen on BOLD	BIOUG17229-A11	GMP#06027	BOLD:AAB1062	BIN on BOLD	BIOUG17229-A11	609	01-Jul-2014	Hymenoptera	Apidae	Bombus	Kate Perez	BIN Taxonomy Match	July
GMTPZ	GMGML	GMGML112-14	Specimen on BOLD	BIOUG17229-B01	GMP#06027	BOLD:AAB1062	BIN on BOLD	BIOUG17229-B01	588	01-Jul-2014	Hymenoptera	Apidae	Bombus	Kate Perez	BIN Taxonomy Match	July
GMTPZ	GMGML	GMGML114-14	Specimen on BOLD	BIOUG17229-B03	GMP#06027	BOLD:AAB1062	BIN on BOLD	BIOUG17229-B03	564	01-Jul-2014	Hymenoptera	Apidae	Bombus	Kate Perez	BIN Taxonomy Match	July
GMTPZ	GMGML	GMGML115-14	Specimen on BOLD	BIOUG17229-B04	GMP#06027	BOLD:AAB1062	BIN on BOLD	BIOUG17229-B04	576	01-Jul-2014	Hymenoptera	Apidae	Bombus	Kate Perez	BIN Taxonomy Match	July
GMTPZ	GMGML	GMGML116-14	Specimen on BOLD	BIOUG17229-B05	GMP#06027	BOLD:AAB1062	BIN on BOLD	BIOUG17229-B05	588	01-Jul-2014	Hymenoptera	Apidae	Bombus	Kate Perez	BIN Taxonomy Match	July
GMTPZ	GMGML	GMGML117-14	Specimen on BOLD	BIOUG17229-B06	GMP#06027	BOLD:AAB1062	BIN on BOLD	BIOUG17229-B06	564	01-Jul-2014	Hymenoptera	Apidae	Bombus	Kate Perez	BIN Taxonomy Match	July
GMTPZ	GMGML	GMGML119-14	Specimen on BOLD	BIOUG17229-B08	GMP#06027	BOLD:AAB1062	BIN on BOLD	BIOUG17229-B08	582	01-Jul-2014	Hymenoptera	Apidae	Bombus	Kate Perez	BIN Taxonomy Match	July
GMTPZ	GMGML	GMGML121-14	Specimen on BOLD	BIOUG17229-B10	GMP#06027	BOLD:AAB1062	BIN on BOLD	BIOUG17229-B10	576	01-Jul-2014	Hymenoptera	Apidae	Bombus	Kate Perez	BIN Taxonomy Match	July
GMTPZ	GMGML	GMGML126-14	Specimen on BOLD	BIOUG17229-C03	GMP#06027	BOLD:AAB1062	BIN on BOLD	BIOUG17229-C03	561	01-Jul-2014	Hymenoptera	Apidae	Bombus	Kate Perez	BIN Taxonomy Match	July
GMTPZ	GMGML	GMGML128-14	Specimen on BOLD	BIOUG17229-C05	GMP#06027	BOLD:AAB1062	BIN on BOLD	BIOUG17229-C05	576	01-Jul-2014	Hymenoptera	Apidae	Bombus	Kate Perez	BIN Taxonomy Match	July
GMTPZ	GMGML	GMGML130-14	Specimen on BOLD	BIOUG17229-C07	GMP#06027	BOLD:AAB1062	BIN on BOLD	BIOUG17229-C07	552	01-Jul-2014	Hymenoptera	Apidae	Bombus	Kate Perez	BIN Taxonomy Match	July
GMTPZ	GMGML	GMGML132-14	Specimen on BOLD	BIOUG17229-C09	GMP#06027	BOLD:AAB1062	BIN on BOLD	BIOUG17229-C09	552	01-Jul-2014	Hymenoptera	Apidae	Bombus	Kate Perez	BIN Taxonomy Match	July
GMTPZ	GMGML	GMGML135-14	Specimen on BOLD	BIOUG17229-C12	GMP#06027	BOLD:AAB1062	BIN on BOLD	BIOUG17229-C12	609	01-Jul-2014	Hymenoptera	Apidae	Bombus	Kate Perez	BIN Taxonomy Match	July
GMTPZ	GMGML	GMGML137-14	Specimen on BOLD	BIOUG17229-D02	GMP#06027	BOLD:AAB1062	BIN on BOLD	BIOUG17229-D02	564	01-Jul-2014	Hymenoptera	Apidae	Bombus	Kate Perez	BIN Taxonomy Match	July
GMTPZ	GMGML	GMGML140-14	Specimen on BOLD	BIOUG17229-D05	GMP#06027	BOLD:AAB1062	BIN on BOLD	BIOUG17229-D05	555	01-Jul-2014	Hymenoptera	Apidae	Bombus	Kate Perez	BIN Taxonomy Match	July
GMTPZ	GMGML	GMGML143-14	Specimen on BOLD	BIOUG17229-D08	GMP#06027	BOLD:AAB1062	BIN on BOLD	BIOUG17229-D08	564	01-Jul-2014	Hymenoptera	Apidae	Bombus	Kate Perez	BIN Taxonomy Match	July
GMTPZ	GMGML	GMGML150-14	Specimen on BOLD	BIOUG17229-E03	GMP#06027	BOLD:AAB1062	BIN on BOLD	BIOUG17229-E03	588	01-Jul-2014	Hymenoptera	Apidae	Bombus	Kate Perez	BIN Taxonomy Match	July
GMTPZ	GMGML	GMGML153-14	Specimen on BOLD	BIOUG17229-E06	GMP#06027	BOLD:AAB1062	BIN on BOLD	BIOUG17229-E06	609	01-Jul-2014	Hymenoptera	Apidae	Bombus	Kate Perez	BIN Taxonomy Match	July
GMTPZ	GMGML	GMGML158-14	Specimen on BOLD	BIOUG17229-E11	GMP#06027	BOLD:AAB1062	BIN on BOLD	BIOUG17229-E11	564	01-Jul-2014	Hymenoptera	Apidae	Bombus	Kate Perez	BIN Taxonomy Match	July
GMTPZ	GMGMM	GMGMM099-14	Specimen on BOLD	BIOUG17297-A02	GMP#06028	BOLD:AAB1062	BIN on BOLD	BIOUG17297-A02	585	15-Jul-2014	Hymenoptera	Apidae	Bombus	Kate Perez	BIN Taxonomy Match	July
GMTPZ	GMGMM	GMGMM100-14	Specimen on BOLD	BIOUG17297-A03	GMP#06028	BOLD:AAB1062	BIN on BOLD	BIOUG17297-A03	555	15-Jul-2014	Hymenoptera	Apidae	Bombus	Kate Perez	BIN Taxonomy Match	July
GMTPZ	GMGMM	GMGMM101-14	Specimen on BOLD	BIOUG17297-A04	GMP#06028	BOLD:AAB1062	BIN on BOLD	BIOUG17297-A04	585	15-Jul-2014	Hymenoptera	Apidae	Bombus	Kate Perez	BIN Taxonomy Match	July
GMTPZ	GMGMM	GMGMM102-14	Specimen on BOLD	BIOUG17297-A05	GMP#06028	BOLD:AAB1062	BIN on BOLD	BIOUG17297-A05	579	15-Jul-2014	Hymenoptera	Apidae	Bombus	Kate Perez	BIN Taxonomy Match	July
GMTPZ	GMGMM	GMGMM103-14	Specimen on BOLD	BIOUG17297-A06	GMP#06028	BOLD:AAB1062	BIN on BOLD	BIOUG17297-A06	582	15-Jul-2014	Hymenoptera	Apidae	Bombus	Kate Perez	BIN Taxonomy Match	July
GMTPZ	GMGMM	GMGMM104-14	Specimen on BOLD	BIOUG17297-A07	GMP#06028	BOLD:AAB1062	BIN on BOLD	BIOUG17297-A07	585	15-Jul-2014	Hymenoptera	Apidae	Bombus	Kate Perez	BIN Taxonomy Match	July
GMTPZ	GMGMM	GMGMM105-14	Specimen on BOLD	BIOUG17297-A08	GMP#06028	BOLD:AAB1062	BIN on BOLD	BIOUG17297-A08	582	15-Jul-2014	Hymenoptera	Apidae	Bombus	Kate Perez	BIN Taxonomy Match	July
GMTPZ	GMGMM	GMGMM106-14	Specimen on BOLD	BIOUG17297-A09	GMP#06028	BOLD:AAB1062	BIN on BOLD	BIOUG17297-A09	579	15-Jul-2014	Hymenoptera	Apidae	Bombus	Kate Perez	BIN Taxonomy Match	July
GMTPZ	GMGMM	GMGMM107-14	Specimen on BOLD	BIOUG17297-A10	GMP#06028	BOLD:AAB1062	BIN on BOLD	BIOUG17297-A10	582	15-Jul-2014	Hymenoptera	Apidae	Bombus	Kate Perez	BIN Taxonomy Match	July
GMTPZ	GMGMM	GMGMM111-14	Specimen on BOLD	BIOUG17297-B02	GMP#06028	BOLD:AAB1062	BIN on BOLD	BIOUG17297-B02	582	15-Jul-2014	Hymenoptera	Apidae	Bombus	Kate Perez	BIN Taxonomy Match	July
GMTPZ	GMGMM	GMGMM115-14	Specimen on BOLD	BIOUG17297-B06	GMP#06028	BOLD:AAB1062	BIN on BOLD	BIOUG17297-B06	585	15-Jul-2014	Hymenoptera	Apidae	Bombus	Kate Perez	BIN Taxonomy Match	July
GMTPZ	GMGMM	GMGMM119-14	Specimen on BOLD	BIOUG17297-B10	GMP#06028	BOLD:AAB1062	BIN on BOLD	BIOUG17297-B10	585	15-Jul-2014	Hymenoptera	Apidae	Bombus	Kate Perez	BIN Taxonomy Match	July
GMTPZ	GMGMM	GMGMM120-14	Specimen on BOLD	BIOUG17297-B11	GMP#06028	BOLD:AAB1062	BIN on BOLD	BIOUG17297-B11	582	15-Jul-2014	Hymenoptera	Apidae	Bombus	Kate Perez	BIN Taxonomy Match	July
GMTPZ	GMGMM	GMGMM121-14	Specimen on BOLD	BIOUG17297-B12	GMP#06028	BOLD:AAB1062	BIN on BOLD	BIOUG17297-B12	579	15-Jul-2014	Hymenoptera	Apidae	Bombus	Kate Perez	BIN Taxonomy Match	July
GMTPZ	GMGMM	GMGMM122-14	Specimen on BOLD	BIOUG17297-C01	GMP#06028	BOLD:AAB1062	BIN on BOLD	BIOUG17297-C01	576	15-Jul-2014	Hymenoptera	Apidae	Bombus	Kate Perez	BIN Taxonomy Match	July
GMTPZ	GMGMM	GMGMM123-14	Specimen on BOLD	BIOUG17297-C02	GMP#06028	BOLD:AAB1062	BIN on BOLD	BIOUG17297-C02	579	15-Jul-2014	Hymenoptera	Apidae	Bombus	Kate Perez	BIN Taxonomy Match	July
GMTPZ	GMGMM	GMGMM124-14	Specimen on BOLD	BIOUG17297-C03	GMP#06028	BOLD:AAB1062	BIN on BOLD	BIOUG17297-C03	579	15-Jul-2014	Hymenoptera	Apidae	Bombus	Kate Perez	BIN Taxonomy Match	July
GMTPZ	GMGMM	GMGMM125-14	Specimen on BOLD	BIOUG17297-C04	GMP#06028	BOLD:AAB1062	BIN on BOLD	BIOUG17297-C04	579	15-Jul-2014	Hymenoptera	Apidae	Bombus	Kate Perez	BIN Taxonomy Match	July
GMTPZ	GMGMM	GMGMM127-14	Specimen on BOLD	BIOUG17297-C06	GMP#06028	BOLD:AAB1062	BIN on BOLD	BIOUG17297-C06	585	15-Jul-2014	Hymenoptera	Apidae	Bombus	Kate Perez	BIN Taxonomy Match	July
GMTPZ	GMGMM	GMGMM130-14	Specimen on BOLD	BIOUG17297-C09	GMP#06028	BOLD:AAB1062	BIN on BOLD	BIOUG17297-C09	582	15-Jul-2014	Hymenoptera	Apidae	Bombus	Kate Perez	BIN Taxonomy Match	July
GMTPZ	GMGMM	GMGMM131-14	Specimen on BOLD	BIOUG17297-C10	GMP#06028	BOLD:AAB1062	BIN on BOLD	BIOUG17297-C10	579	15-Jul-2014	Hymenoptera	Apidae	Bombus	Kate Perez	BIN Taxonomy Match	July
GMTPZ	GMGMM	GMGMM132-14	Specimen on BOLD	BIOUG17297-C11	GMP#06028	BOLD:AAB1062	BIN on BOLD	BIOUG17297-C11	585	15-Jul-2014	Hymenoptera	Apidae	Bombus	Kate Perez	BIN Taxonomy Match	July
GMTPZ	GMGMM	GMGMM135-14	Specimen on BOLD	BIOUG17297-D02	GMP#06028	BOLD:AAB1062	BIN on BOLD	BIOUG17297-D02	531	15-Jul-2014	Hymenoptera	Apidae	Bombus	Kate Perez	BIN Taxonomy Match	July
GMTPZ	GMGMM	GMGMM136-14	Specimen on BOLD	BIOUG17297-D03	GMP#06028	BOLD:AAB1062	BIN on BOLD	BIOUG17297-D03	585	15-Jul-2014	Hymenoptera	Apidae	Bombus	Kate Perez	BIN Taxonomy Match	July
GMTPZ	GMGMM	GMGMM138-14	Specimen on BOLD	BIOUG17297-D05	GMP#06028	BOLD:AAB1062	BIN on BOLD	BIOUG17297-D05	579	15-Jul-2014	Hymenoptera	Apidae	Bombus	Kate Perez	BIN Taxonomy Match	July
GMTPZ	GMGMM	GMGMM141-14	Specimen on BOLD	BIOUG17297-D08	GMP#06028	BOLD:AAB1062	BIN on BOLD	BIOUG17297-D08	585	15-Jul-2014	Hymenoptera	Apidae	Bombus	Kate Perez	BIN Taxonomy Match	July
GMTPZ	GMGMM	GMGMM144-14	Specimen on BOLD	BIOUG17297-D11	GMP#06028	BOLD:AAB1062	BIN on BOLD	BIOUG17297-D11	585	15-Jul-2014	Hymenoptera	Apidae	Bombus	Kate Perez	BIN Taxonomy Match	July
GMTPZ	GMGMM	GMGMM145-14	Specimen on BOLD	BIOUG17297-D12	GMP#06028	BOLD:AAB1062	BIN on BOLD	BIOUG17297-D12	585	15-Jul-2014	Hymenoptera	Apidae	Bombus	Kate Perez	BIN Taxonomy Match	July
GMTPZ	GMGMM	GMGMM148-14	Specimen on BOLD	BIOUG17297-E03	GMP#06028	BOLD:AAB1062	BIN on BOLD	BIOUG17297-E03	585	15-Jul-2014	Hymenoptera	Apidae	Bombus	Kate Perez	BIN Taxonomy Match	July
GMTPZ	GMGMM	GMGMM151-14	Specimen on BOLD	BIOUG17297-E06	GMP#06028	BOLD:AAB1062	BIN on BOLD	BIOUG17297-E06	567	15-Jul-2014	Hymenoptera	Apidae	Bombus	Kate Perez	BIN Taxonomy Match	July
GMTPZ	GMGMM	GMGMM158-14	Specimen on BOLD	BIOUG17297-F01	GMP#06028	BOLD:AAB1062	BIN on BOLD	BIOUG17297-F01	579	15-Jul-2014	Hymenoptera	Apidae	Bombus	Kate Perez	BIN Taxonomy Match	July
GMTPZ	GMGMM	GMGMM163-14	Specimen on BOLD	BIOUG17297-F06	GMP#06028	BOLD:AAB1062	BIN on BOLD	BIOUG17297-F06	582	15-Jul-2014	Hymenoptera	Apidae	Bombus	Kate Perez	BIN Taxonomy Match	July
GMTPZ	GMGMM	GMGMM165-14	Specimen on BOLD	BIOUG17297-F08	GMP#06028	BOLD:AAB1062	BIN on BOLD	BIOUG17297-F08	585	15-Jul-2014	Hymenoptera	Apidae	Bombus	Kate Perez	BIN Taxonomy Match	July
GMTPZ	GMGMM	GMGMM166-14	Specimen on BOLD	BIOUG17297-F09	GMP#06028	BOLD:AAB1062	BIN on BOLD	BIOUG17297-F09	585	15-Jul-2014	Hymenoptera	Apidae	Bombus	Kate Perez	BIN Taxonomy Match	July
GMTPZ	GMGMM	GMGMM167-14	Specimen on BOLD	BIOUG17297-F10	GMP#06028	BOLD:AAB1062	BIN on BOLD	BIOUG17297-F10	585	15-Jul-2014	Hymenoptera	Apidae	Bombus	Kate Perez	BIN Taxonomy Match	July
GMTPZ	GMGMM	GMGMM168-14	Specimen on BOLD	BIOUG17297-F11	GMP#06028	BOLD:AAB1062	BIN on BOLD	BIOUG17297-F11	579	15-Jul-2014	Hymenoptera	Apidae	Bombus	Kate Perez	BIN Taxonomy Match	July
GMTPZ	GMGMM	GMGMM169-14	Specimen on BOLD	BIOUG17297-F12	GMP#06028	BOLD:AAB1062	BIN on BOLD	BIOUG17297-F12	585	15-Jul-2014	Hymenoptera	Apidae	Bombus	Kate Perez	BIN Taxonomy Match	July
GMTPZ	GMGMM	GMGMM176-14	Specimen on BOLD	BIOUG17297-G07	GMP#06028	BOLD:AAB1062	BIN on BOLD	BIOUG17297-G07	579	15-Jul-2014	Hymenoptera	Apidae	Bombus	Kate Perez	BIN Taxonomy Match	July
GMTPZ	GMGMM	GMGMM178-14	Specimen on BOLD	BIOUG17297-G09	GMP#06028	BOLD:AAB1062	BIN on BOLD	BIOUG17297-G09	579	15-Jul-2014	Hymenoptera	Apidae	Bombus	Kate Perez	BIN Taxonomy Match	July
GMTPZ	GMGMM	GMGMM181-14	Specimen on BOLD	BIOUG17297-G12	GMP#06028	BOLD:AAB1062	BIN on BOLD	BIOUG17297-G12	546	15-Jul-2014	Hymenoptera	Apidae	Bombus	Kate Perez	BIN Taxonomy Match	July
GMTPZ	GMGMM	GMGMM184-14	Specimen on BOLD	BIOUG17297-H03	GMP#06028	BOLD:AAB1062	BIN on BOLD	BIOUG17297-H03	585	15-Jul-2014	Hymenoptera	Apidae	Bombus	Kate Perez	BIN Taxonomy Match	July
GMTPZ	GMGMM	GMGMM188-14	Specimen on BOLD	BIOUG17297-H07	GMP#06028	BOLD:AAB1062	BIN on BOLD	BIOUG17297-H07	582	15-Jul-2014	Hymenoptera	Apidae	Bombus	Kate Perez	BIN Taxonomy Match	July
GMTPZ	GMGMN	GMGMN012-14	Specimen on BOLD	BIOUG17299-E12	GMP#06029	BOLD:AAB1062	BIN on BOLD	BIOUG17299-E12	591	29-Jul-2014	Hymenoptera	Apidae	Bombus	Kate Perez	BIN Taxonomy Match	July
GMTPZ	GMGMN	GMGMN019-14	Specimen on BOLD	BIOUG17299-F07	GMP#06029	BOLD:AAB1062	BIN on BOLD	BIOUG17299-F07	525	29-Jul-2014	Hymenoptera	Apidae	Bombus	Kate Perez	BIN Taxonomy Match	July
GMTPZ	GMGMN	GMGMN023-14	Specimen on BOLD	BIOUG17299-F11	GMP#06029	BOLD:AAB1062	BIN on BOLD	BIOUG17299-F11	576	29-Jul-2014	Hymenoptera	Apidae	Bombus	Kate Perez	BIN Taxonomy Match	July
GMTPZ	GMGMN	GMGMN024-14	Specimen on BOLD	BIOUG17299-F12	GMP#06029	BOLD:AAB1062	BIN on BOLD	BIOUG17299-F12	588	29-Jul-2014	Hymenoptera	Apidae	Bombus	Kate Perez	BIN Taxonomy Match	July
GMTPZ	GMGMN	GMGMN025-14	Specimen on BOLD	BIOUG17299-G01	GMP#06029	BOLD:AAB1062	BIN on BOLD	BIOUG17299-G01	567	29-Jul-2014	Hymenoptera	Apidae	Bombus	Kate Perez	BIN Taxonomy Match	July
GMTPZ	GMGMN	GMGMN034-14	Specimen on BOLD	BIOUG17299-G10	GMP#06029	BOLD:AAB1062	BIN on BOLD	BIOUG17299-G10	573	29-Jul-2014	Hymenoptera	Apidae	Bombus	Kate Perez	BIN Taxonomy Match	July
GMTPZ	GMGMN	GMGMN046-14	Specimen on BOLD	BIOUG17299-H10	GMP#06029	BOLD:AAB1062	BIN on BOLD	BIOUG17299-H10	573	29-Jul-2014	Hymenoptera	Apidae	Bombus	Kate Perez	BIN Taxonomy Match	July
GMTPZ	GMGMN	GMGMN047-14	Specimen on BOLD	BIOUG17299-H11	GMP#06029	BOLD:AAB1062	BIN on BOLD	BIOUG17299-H11	609	29-Jul-2014	Hymenoptera	Apidae	Bombus	Kate Perez	BIN Taxonomy Match	July
GMTPZ	GMGMN	GMGMN152-14	Specimen on BOLD	BIOUG17382-A06	GMP#06029	BOLD:AAB1062	BIN on BOLD	BIOUG17382-A06	576	29-Jul-2014	Hymenoptera	Apidae	Bombus	Kate Perez	BIN Taxonomy Match	July
GMTPZ	GMGMN	GMGMN155-14	Specimen on BOLD	BIOUG17382-A09	GMP#06029	BOLD:AAB1062	BIN on BOLD	BIOUG17382-A09	594	29-Jul-2014	Hymenoptera	Apidae	Bombus	Kate Perez	BIN Taxonomy Match	July
GMTPZ	GMGMN	GMGMN159-14	Specimen on BOLD	BIOUG17382-B01	GMP#06029	BOLD:AAB1062	BIN on BOLD	BIOUG17382-B01	564	29-Jul-2014	Hymenoptera	Apidae	Bombus	Kate Perez	BIN Taxonomy Match	July
GMTPZ	GMGMN	GMGMN160-14	Specimen on BOLD	BIOUG17382-B02	GMP#06029	BOLD:AAB1062	BIN on BOLD	BIOUG17382-B02	588	29-Jul-2014	Hymenoptera	Apidae	Bombus	Kate Perez	BIN Taxonomy Match	July
GMTPZ	GMGMN	GMGMN161-14	Specimen on BOLD	BIOUG17382-B03	GMP#06029	BOLD:AAB1062	BIN on BOLD	BIOUG17382-B03	588	29-Jul-2014	Hymenoptera	Apidae	Bombus	Kate Perez	BIN Taxonomy Match	July
GMTPZ	GMGMN	GMGMN162-14	Specimen on BOLD	BIOUG17382-B04	GMP#06029	BOLD:AAB1062	BIN on BOLD	BIOUG17382-B04	588	29-Jul-2014	Hymenoptera	Apidae	Bombus	Kate Perez	BIN Taxonomy Match	July
GMTPZ	GMGMN	GMGMN167-14	Specimen on BOLD	BIOUG17382-B09	GMP#06029	BOLD:AAB1062	BIN on BOLD	BIOUG17382-B09	576	29-Jul-2014	Hymenoptera	Apidae	Bombus	Kate Perez	BIN Taxonomy Match	July
GMTPZ	GMGMN	GMGMN169-14	Specimen on BOLD	BIOUG17382-B11	GMP#06029	BOLD:AAB1062	BIN on BOLD	BIOUG17382-B11	582	29-Jul-2014	Hymenoptera	Apidae	Bombus	Kate Perez	BIN Taxonomy Match	July
GMTPZ	GMGMN	GMGMN180-14	Specimen on BOLD	BIOUG17382-C10	GMP#06029	BOLD:AAB1062	BIN on BOLD	BIOUG17382-C10	585	29-Jul-2014	Hymenoptera	Apidae	Bombus	Kate Perez	BIN Taxonomy Match	July
GMTPZ	GMGMN	GMGMN182-14	Specimen on BOLD	BIOUG17382-C12	GMP#06029	BOLD:AAB1062	BIN on BOLD	BIOUG17382-C12	576	29-Jul-2014	Hymenoptera	Apidae	Bombus	Kate Perez	BIN Taxonomy Match	July
GMTPZ	GMGMN	GMGMN187-14	Specimen on BOLD	BIOUG17382-D05	GMP#06029	BOLD:AAB1062	BIN on BOLD	BIOUG17382-D05	585	29-Jul-2014	Hymenoptera	Apidae	Bombus	Kate Perez	BIN Taxonomy Match	July
GMTPZ	GMGMN	GMGMN191-14	Specimen on BOLD	BIOUG17382-D09	GMP#06029	BOLD:AAB1062	BIN on BOLD	BIOUG17382-D09	576	29-Jul-2014	Hymenoptera	Apidae	Bombus	Kate Perez	BIN Taxonomy Match	July
GMTPZ	GMGMN	GMGMN280-14	Specimen on BOLD	BIOUG17383-D03	GMP#06029	BOLD:AAB1062	BIN on BOLD	BIOUG17383-D03	594	29-Jul-2014	Hymenoptera	Apidae	Bombus	Kate Perez	BIN Taxonomy Match	July
GMTPZ	GMGMN	GMGMN037-14	Specimen on BOLD	BIOUG17299-H01	GMP#06029	BOLD:AAB1065	BIN on BOLD	BIOUG17299-H01	549	29-Jul-2014	Hymenoptera	Apidae	Bombus	Kate Perez	BIN Taxonomy Match	July
GMTPE	GMGRA	GMGRA1469-13	Specimen on BOLD	BIOUG04800-G08	bayw.1	BOLD:AAB1188	BIN on BOLD	BIOUG04800-G08	633	04-May-2012	Hymenoptera	Ichneumonidae	Orthocentrus	Kate Perez	BIN Taxonomy Match	May
GMTPE	GMGRA	GMGRA760-13	Specimen on BOLD	BIOUG04463-F04	bayw.1	BOLD:AAB1188	BIN on BOLD	BIOUG04463-F04	637	04-May-2012	Hymenoptera	Ichneumonidae	Orthocentrus	Kate Perez	BIN Taxonomy Match	May
GMTPE	GMGRB	GMGRB1418-13	Specimen on BOLD	BIOUG05261-D03	bayw.3	BOLD:AAB1188	BIN on BOLD	BIOUG05261-D03	635	18-May-2012	Hymenoptera	Ichneumonidae	Orthocentrus	Kate Perez	BIN Taxonomy Match	May
GMTPE	GMGRD	GMGRD3195-13	Specimen on BOLD	BIOUG06059-D06	bayw.7	BOLD:AAB1188	BIN on BOLD	BIOUG06059-D06	591	20-Jun-2012	Hymenoptera	Ichneumonidae	Orthocentrus	Kate Perez	BIN Taxonomy Match	June
GMTPE	GMGRI	GMGRI652-13	Specimen on BOLD	BIOUG08368-A06	bayw.17	BOLD:AAB1188	BIN on BOLD	BIOUG08368-A06	579	22-Sep-2012	Hymenoptera	Ichneumonidae	Orthocentrus	Kate Perez	BIN Taxonomy Match	September
GMTPZ	GMGMN	GMGMN1502-14	Specimen on BOLD	BIOUG17466-H06	GMP#06029	BOLD:AAB2384	BIN on BOLD	BIOUG17466-H06	537	29-Jul-2014	Hymenoptera	Ichneumonidae	Acrotomus	Kate Perez	BOLD ID Engine Manual	July
GMTPZ	GMGMN	GMGMN1302-14	Specimen on BOLD	BIOUG17446-G08	GMP#06029	BOLD:AAB2866	BIN on BOLD	BIOUG17446-G08	614	29-Jul-2014	Hymenoptera	Ichneumonidae	Acrotomus	Kate Perez	BOLD ID Engine Manual	July
GMTPZ	GMGMN	GMGMN1452-14	Specimen on BOLD	BIOUG17466-D04	GMP#06029	BOLD:AAB2866	BIN on BOLD	BIOUG17466-D04	579	29-Jul-2014	Hymenoptera	Ichneumonidae	Acrotomus	Kate Perez	BOLD ID Engine Manual	July
GMTPZ	GMGMN	GMGMN1454-14	Specimen on BOLD	BIOUG17466-D06	GMP#06029	BOLD:AAB2866	BIN on BOLD	BIOUG17466-D06	550	29-Jul-2014	Hymenoptera	Ichneumonidae	Acrotomus	Kate Perez	BOLD ID Engine Manual	July
GMTPZ	GMGMN	GMGMN1470-14	Specimen on BOLD	BIOUG17466-E10	GMP#06029	BOLD:AAB2866	BIN on BOLD	BIOUG17466-E10	588	29-Jul-2014	Hymenoptera	Ichneumonidae	Acrotomus	Kate Perez	BOLD ID Engine Manual	July
GMTPZ	GMGMN	GMGMN1498-14	Specimen on BOLD	BIOUG17466-H02	GMP#06029	BOLD:AAB2866	BIN on BOLD	BIOUG17466-H02	534	29-Jul-2014	Hymenoptera	Ichneumonidae	Acrotomus	Kate Perez	BOLD ID Engine Manual	July
GMTPZ	GMGMN	GMGMN1564-14	Specimen on BOLD	BIOUG17467-E09	GMP#06029	BOLD:AAB2866	BIN on BOLD	BIOUG17467-E09	576	29-Jul-2014	Hymenoptera	Ichneumonidae	Acrotomus	Kate Perez	BOLD ID Engine Manual	July
GMTPZ	GMGMN	GMGMN1567-14	Specimen on BOLD	BIOUG17467-E12	GMP#06029	BOLD:AAB2866	BIN on BOLD	BIOUG17467-E12	602	29-Jul-2014	Hymenoptera	Ichneumonidae	Acrotomus	Kate Perez	BOLD ID Engine Manual	July
GMTPZ	GMGMA	GMGMA691-14	Specimen on BOLD	BIOUG16212-B07	GMP#06015	BOLD:AAB2949	BIN on BOLD	BIOUG16212-B07	592	25-Jul-2013	Hymenoptera	Halictidae	Lasioglossum	Kate Perez	BIN Taxonomy Match	July
GMTPZ	GMGMB	GMGMB1489-14	Specimen on BOLD	BIOUG16354-B06	GMP#06017	BOLD:AAB2949	BIN on BOLD	BIOUG16354-B06	591	26-Aug-2013	Hymenoptera	Halictidae	Lasioglossum	Kate Perez	BIN Taxonomy Match	August
GMTPZ	GMGMC	GMGMC1005-14	Specimen on BOLD	BIOUG16524-D02	GMP#06016	BOLD:AAB2949	BIN on BOLD	BIOUG16524-D02	588	08-Aug-2013	Hymenoptera	Halictidae	Lasioglossum	Kate Perez	BIN Taxonomy Match	August
GMTPZ	GMGMC	GMGMC657-14	Specimen on BOLD	BIOUG16520-A07	GMP#06016	BOLD:AAB2949	BIN on BOLD	BIOUG16520-A07	579	08-Aug-2013	Hymenoptera	Halictidae	Lasioglossum	Kate Perez	BIN Taxonomy Match	August
GMTPZ	GMGMI	GMGMI400-14	Specimen on BOLD	BIOUG17111-B03	GMP#06024	BOLD:AAB2949	BIN on BOLD	BIOUG17111-B03	546	16-May-2014	Hymenoptera	Halictidae	Lasioglossum	Kate Perez	BIN Taxonomy Match	May
GMTPZ	GMGMB	GMGMB530-14	Specimen on BOLD	BIOUG16273-C06	GMP#06017	BOLD:AAB6388	BIN on BOLD	BIOUG16273-C06	582	26-Aug-2013	Hymenoptera	Vespidae	Dolichovespula	Kate Perez	BIN Taxonomy Match	August
GMTPZ	GMGMD	GMGMD1215-14	Specimen on BOLD	BIOUG16618-B02	GMP#06018	BOLD:AAB7299	BIN on BOLD	BIOUG16618-B02	553	16-Sep-2013	Hymenoptera	Colletidae	Colletes	Kate Perez	BIN Taxonomy Match	September
GMTPZ	GMGMD	GMGMD199-14	Specimen on BOLD	BIOUG16607-D07	GMP#06018	BOLD:AAB7299	BIN on BOLD	BIOUG16607-D07	575	16-Sep-2013	Hymenoptera	Colletidae	Colletes	Kate Perez	BIN Taxonomy Match	September
GMTPZ	GMGMN	GMGMN1581-14	Specimen on BOLD	BIOUG17467-G02	GMP#06029	BOLD:AAB9919	BIN on BOLD	BIOUG17467-G02	555	29-Jul-2014	Hymenoptera	Ichneumonidae	Acrotomus	Kate Perez	BOLD ID Engine Manual	July
GMTPZ	GMGMN	GMGMN1585-14	Specimen on BOLD	BIOUG17467-G06	GMP#06029	BOLD:AAB9919	BIN on BOLD	BIOUG17467-G06	570	29-Jul-2014	Hymenoptera	Ichneumonidae	Acrotomus	Kate Perez	BOLD ID Engine Manual	July
GMTPZ	GMGMA	GMGMA1118-14	Specimen on BOLD	BIOUG16216-F06	GMP#06015	BOLD:AAC0157	BIN on BOLD	BIOUG16216-F06	540	25-Jul-2013	Hymenoptera	Tenthredinidae	Athalia	Kate Perez	BIN Taxonomy Match	July
GMTPZ	GMGMB	GMGMB614-14	Specimen on BOLD	BIOUG16274-B07	GMP#06017	BOLD:AAC0157	BIN on BOLD	BIOUG16274-B07	582	26-Aug-2013	Hymenoptera	Tenthredinidae	Athalia	Kate Perez	BIN Taxonomy Match	August
GMTPZ	GMGMB	GMGMB619-14	Specimen on BOLD	BIOUG16274-B12	GMP#06017	BOLD:AAC0157	BIN on BOLD	BIOUG16274-B12	576	26-Aug-2013	Hymenoptera	Tenthredinidae	Athalia	Kate Perez	BIN Taxonomy Match	August
GMTPZ	GMGMB	GMGMB641-14	Specimen on BOLD	BIOUG16274-D10	GMP#06017	BOLD:AAC0157	BIN on BOLD	BIOUG16274-D10	582	26-Aug-2013	Hymenoptera	Tenthredinidae	Athalia	Kate Perez	BIN Taxonomy Match	August
GMTPZ	GMGMB	GMGMB644-14	Specimen on BOLD	BIOUG16274-E01	GMP#06017	BOLD:AAC0157	BIN on BOLD	BIOUG16274-E01	561	26-Aug-2013	Hymenoptera	Tenthredinidae	Athalia	Kate Perez	BIN Taxonomy Match	August
GMTPZ	GMGMB	GMGMB681-14	Specimen on BOLD	BIOUG16274-H02	GMP#06017	BOLD:AAC0157	BIN on BOLD	BIOUG16274-H02	582	26-Aug-2013	Hymenoptera	Tenthredinidae	Athalia	Kate Perez	BIN Taxonomy Match	August
GMTPZ	GMGMC	GMGMC1031-14	Specimen on BOLD	BIOUG16524-F04	GMP#06016	BOLD:AAC0157	BIN on BOLD	BIOUG16524-F04	556	08-Aug-2013	Hymenoptera	Tenthredinidae	Athalia	Kate Perez	BIN Taxonomy Match	August
GMTPZ	GMGMC	GMGMC710-14	Specimen on BOLD	BIOUG16520-E12	GMP#06016	BOLD:AAC0157	BIN on BOLD	BIOUG16520-E12	582	08-Aug-2013	Hymenoptera	Tenthredinidae	Athalia	Kate Perez	BIN Taxonomy Match	August
GMTPZ	GMGMC	GMGMC948-14	Specimen on BOLD	BIOUG16523-G04	GMP#06016	BOLD:AAC0157	BIN on BOLD	BIOUG16523-G04	573	08-Aug-2013	Hymenoptera	Tenthredinidae	Athalia	Kate Perez	BIN Taxonomy Match	August
GMTPZ	GMGMC	GMGMC976-14	Specimen on BOLD	BIOUG16524-A09	GMP#06016	BOLD:AAC0157	BIN on BOLD	BIOUG16524-A09	570	08-Aug-2013	Hymenoptera	Tenthredinidae	Athalia	Kate Perez	BIN Taxonomy Match	August
GMTPZ	GMGMD	GMGMD276-14	Specimen on BOLD	BIOUG16608-C01	GMP#06018	BOLD:AAC0157	BIN on BOLD	BIOUG16608-C01	582	16-Sep-2013	Hymenoptera	Tenthredinidae	Athalia	Kate Perez	BIN Taxonomy Match	September
GMTPZ	GMGMD	GMGMD279-14	Specimen on BOLD	BIOUG16608-C04	GMP#06018	BOLD:AAC0157	BIN on BOLD	BIOUG16608-C04	570	16-Sep-2013	Hymenoptera	Tenthredinidae	Athalia	Kate Perez	BIN Taxonomy Match	September
GMTPZ	GMGMD	GMGMD285-14	Specimen on BOLD	BIOUG16608-C10	GMP#06018	BOLD:AAC0157	BIN on BOLD	BIOUG16608-C10	576	16-Sep-2013	Hymenoptera	Tenthredinidae	Athalia	Kate Perez	BIN Taxonomy Match	September
GMTPZ	GMGMD	GMGMD288-14	Specimen on BOLD	BIOUG16608-D01	GMP#06018	BOLD:AAC0157	BIN on BOLD	BIOUG16608-D01	555	16-Sep-2013	Hymenoptera	Tenthredinidae	Athalia	Kate Perez	BIN Taxonomy Match	September
GMTPZ	GMGMD	GMGMD338-14	Specimen on BOLD	BIOUG16608-H03	GMP#06018	BOLD:AAC0157	BIN on BOLD	BIOUG16608-H03	607	16-Sep-2013	Hymenoptera	Tenthredinidae	Athalia	Kate Perez	BIN Taxonomy Match	September
GMTPZ	GMGMI	GMGMI1087-14	Specimen on BOLD	BIOUG17118-D01	GMP#06024	BOLD:AAC0157	BIN on BOLD	BIOUG17118-D01	582	16-May-2014	Hymenoptera	Tenthredinidae	Athalia	Kate Perez	BIN Taxonomy Match	May
GMTPZ	GMGMI	GMGMI595-14	Specimen on BOLD	BIOUG17113-B08	GMP#06024	BOLD:AAC0157	BIN on BOLD	BIOUG17113-B08	571	16-May-2014	Hymenoptera	Tenthredinidae	Athalia	Kate Perez	BIN Taxonomy Match	May
GMTPZ	GMGMI	GMGMI638-14	Specimen on BOLD	BIOUG17113-F03	GMP#06024	BOLD:AAC0157	BIN on BOLD	BIOUG17113-F03	583	16-May-2014	Hymenoptera	Tenthredinidae	Athalia	Kate Perez	BIN Taxonomy Match	May
GMTPZ	GMGMI	GMGMI873-14	Specimen on BOLD	BIOUG17116-B01	GMP#06024	BOLD:AAC0157	BIN on BOLD	BIOUG17116-B01	534	16-May-2014	Hymenoptera	Tenthredinidae	Athalia	Kate Perez	BIN Taxonomy Match	May
GMTPZ	GMGMJ	GMGMJ1298-14	Specimen on BOLD	BIOUG17097-E08	GMP#06025	BOLD:AAC0157	BIN on BOLD	BIOUG17097-E08	588	02-Jun-2014	Hymenoptera	Tenthredinidae	Athalia	Kate Perez	BIN Taxonomy Match	June
GMTPZ	GMGMK	GMGMK1481-14	Specimen on BOLD	BIOUG17226-C06	GMP#06026	BOLD:AAC0157	BIN on BOLD	BIOUG17226-C06	588	17-Jun-2014	Hymenoptera	Tenthredinidae	Athalia	Kate Perez	BIN Taxonomy Match	June
GMTPZ	GMGML	GMGML1514-14	Specimen on BOLD	BIOUG17272-D08	GMP#06027	BOLD:AAC0157	BIN on BOLD	BIOUG17272-D08	588	01-Jul-2014	Hymenoptera	Tenthredinidae	Athalia	Kate Perez	BIN Taxonomy Match	July
GMTPZ	GMGML	GMGML412-14	Specimen on BOLD	BIOUG17231-G10	GMP#06027	BOLD:AAC0157	BIN on BOLD	BIOUG17231-G10	582	01-Jul-2014	Hymenoptera	Tenthredinidae	Athalia	Kate Perez	BIN Taxonomy Match	July
GMTPZ	GMGMM	GMGMM436-14	Specimen on BOLD	BIOUG17301-D04	GMP#06028	BOLD:AAC0157	BIN on BOLD	BIOUG17301-D04	588	15-Jul-2014	Hymenoptera	Tenthredinidae	Athalia	Kate Perez	BIN Taxonomy Match	July
GMTPZ	GMGMM	GMGMM900-14	Specimen on BOLD	BIOUG17373-C05	GMP#06028	BOLD:AAC0157	BIN on BOLD	BIOUG17373-C05	588	15-Jul-2014	Hymenoptera	Tenthredinidae	Athalia	Kate Perez	BIN Taxonomy Match	July
GMTPZ	GMGMN	GMGMN1348-14	Specimen on BOLD	BIOUG17447-C07	GMP#06029	BOLD:AAC0157	BIN on BOLD	BIOUG17447-C07	576	29-Jul-2014	Hymenoptera	Ichneumonidae	Acrotomus	Kate Perez	BOLD ID Engine Manual	July
GMTPZ	GMGMI	GMGMI650-14	Specimen on BOLD	BIOUG17113-G03	GMP#06024	BOLD:AAC2167	BIN on BOLD	BIOUG17113-G03	612	16-May-2014	Hymenoptera	Braconidae	Dolichogenidea	Kate Perez	BOLD ID Engine Manual	May
GMTPZ	GMGMA	GMGMA411-14	Specimen on BOLD	BIOUG16209-B12	GMP#06015	BOLD:AAC4378	BIN on BOLD	BIOUG16209-B12	596	25-Jul-2013	Hymenoptera	Apidae	Bombus	Kate Perez	BIN Taxonomy Match	July
GMTPZ	GMGMA	GMGMA430-14	Specimen on BOLD	BIOUG16209-D07	GMP#06015	BOLD:AAC4378	BIN on BOLD	BIOUG16209-D07	607	25-Jul-2013	Hymenoptera	Apidae	Bombus	Kate Perez	BIN Taxonomy Match	July
GMTPZ	GMGMA	GMGMA449-14	Specimen on BOLD	BIOUG16209-F02	GMP#06015	BOLD:AAC4378	BIN on BOLD	BIOUG16209-F02	516	25-Jul-2013	Hymenoptera	Apidae	Bombus	Kate Perez	BIN Taxonomy Match	July
GMTPZ	GMGMA	GMGMA455-14	Specimen on BOLD	BIOUG16209-F08	GMP#06015	BOLD:AAC4378	BIN on BOLD	BIOUG16209-F08	591	25-Jul-2013	Hymenoptera	Apidae	Bombus	Kate Perez	BIN Taxonomy Match	July
GMTPZ	GMGMA	GMGMA465-14	Specimen on BOLD	BIOUG16209-G06	GMP#06015	BOLD:AAC4378	BIN on BOLD	BIOUG16209-G06	589	25-Jul-2013	Hymenoptera	Apidae	Bombus	Kate Perez	BIN Taxonomy Match	July
GMTPZ	GMGMA	GMGMA605-14	Specimen on BOLD	BIOUG16211-C04	GMP#06015	BOLD:AAC4378	BIN on BOLD	BIOUG16211-C04	608	25-Jul-2013	Hymenoptera	Apidae	Bombus	Kate Perez	BIN Taxonomy Match	July
GMTPZ	GMGMB	GMGMB1465-14	Specimen on BOLD	BIOUG16353-B03	GMP#06017	BOLD:AAC4378	BIN on BOLD	BIOUG16353-B03	572	26-Aug-2013	Hymenoptera	Apidae	Bombus	Kate Perez	BIN Taxonomy Match	August
GMTPZ	GMGMB	GMGMB502-14	Specimen on BOLD	BIOUG16273-A02	GMP#06017	BOLD:AAC4378	BIN on BOLD	BIOUG16273-A02	567	26-Aug-2013	Hymenoptera	Apidae	Bombus	Kate Perez	BIN Taxonomy Match	August
GMTPZ	GMGMB	GMGMB504-14	Specimen on BOLD	BIOUG16273-A04	GMP#06017	BOLD:AAC4378	BIN on BOLD	BIOUG16273-A04	552	26-Aug-2013	Hymenoptera	Apidae	Bombus	Kate Perez	BIN Taxonomy Match	August
GMTPZ	GMGMB	GMGMB505-14	Specimen on BOLD	BIOUG16273-A05	GMP#06017	BOLD:AAC4378	BIN on BOLD	BIOUG16273-A05	568	26-Aug-2013	Hymenoptera	Apidae	Bombus	Kate Perez	BIN Taxonomy Match	August
GMTPZ	GMGMB	GMGMB509-14	Specimen on BOLD	BIOUG16273-A09	GMP#06017	BOLD:AAC4378	BIN on BOLD	BIOUG16273-A09	585	26-Aug-2013	Hymenoptera	Apidae	Bombus	Kate Perez	BIN Taxonomy Match	August
GMTPZ	GMGMB	GMGMB510-14	Specimen on BOLD	BIOUG16273-A10	GMP#06017	BOLD:AAC4378	BIN on BOLD	BIOUG16273-A10	579	26-Aug-2013	Hymenoptera	Apidae	Bombus	Kate Perez	BIN Taxonomy Match	August
GMTPZ	GMGMB	GMGMB518-14	Specimen on BOLD	BIOUG16273-B06	GMP#06017	BOLD:AAC4378	BIN on BOLD	BIOUG16273-B06	591	26-Aug-2013	Hymenoptera	Apidae	Bombus	Kate Perez	BIN Taxonomy Match	August
GMTPZ	GMGMB	GMGMB523-14	Specimen on BOLD	BIOUG16273-B11	GMP#06017	BOLD:AAC4378	BIN on BOLD	BIOUG16273-B11	588	26-Aug-2013	Hymenoptera	Apidae	Bombus	Kate Perez	BIN Taxonomy Match	August
GMTPZ	GMGMB	GMGMB526-14	Specimen on BOLD	BIOUG16273-C02	GMP#06017	BOLD:AAC4378	BIN on BOLD	BIOUG16273-C02	555	26-Aug-2013	Hymenoptera	Apidae	Bombus	Kate Perez	BIN Taxonomy Match	August
GMTPZ	GMGMB	GMGMB537-14	Specimen on BOLD	BIOUG16273-D01	GMP#06017	BOLD:AAC4378	BIN on BOLD	BIOUG16273-D01	546	26-Aug-2013	Hymenoptera	Apidae	Bombus	Kate Perez	BIN Taxonomy Match	August
GMTPZ	GMGMB	GMGMB546-14	Specimen on BOLD	BIOUG16273-D10	GMP#06017	BOLD:AAC4378	BIN on BOLD	BIOUG16273-D10	525	26-Aug-2013	Hymenoptera	Apidae	Bombus	Kate Perez	BIN Taxonomy Match	August
GMTPZ	GMGMB	GMGMB548-14	Specimen on BOLD	BIOUG16273-D12	GMP#06017	BOLD:AAC4378	BIN on BOLD	BIOUG16273-D12	528	26-Aug-2013	Hymenoptera	Apidae	Bombus	Kate Perez	BIN Taxonomy Match	August
GMTPZ	GMGMB	GMGMB552-14	Specimen on BOLD	BIOUG16273-E04	GMP#06017	BOLD:AAC4378	BIN on BOLD	BIOUG16273-E04	528	26-Aug-2013	Hymenoptera	Apidae	Bombus	Kate Perez	BIN Taxonomy Match	August
GMTPZ	GMGMB	GMGMB557-14	Specimen on BOLD	BIOUG16273-E09	GMP#06017	BOLD:AAC4378	BIN on BOLD	BIOUG16273-E09	579	26-Aug-2013	Hymenoptera	Apidae	Bombus	Kate Perez	BIN Taxonomy Match	August
GMTPZ	GMGMB	GMGMB559-14	Specimen on BOLD	BIOUG16273-E11	GMP#06017	BOLD:AAC4378	BIN on BOLD	BIOUG16273-E11	519	26-Aug-2013	Hymenoptera	Apidae	Bombus	Kate Perez	BIN Taxonomy Match	August
GMTPZ	GMGMB	GMGMB560-14	Specimen on BOLD	BIOUG16273-E12	GMP#06017	BOLD:AAC4378	BIN on BOLD	BIOUG16273-E12	555	26-Aug-2013	Hymenoptera	Apidae	Bombus	Kate Perez	BIN Taxonomy Match	August
GMTPZ	GMGMC	GMGMC146-14	Specimen on BOLD	BIOUG16356-A11	GMP#06016	BOLD:AAC4378	BIN on BOLD	BIOUG16356-A11	537	08-Aug-2013	Hymenoptera	Apidae	Bombus	Kate Perez	BIN Taxonomy Match	August
GMTPZ	GMGMC	GMGMC148-14	Specimen on BOLD	BIOUG16356-B01	GMP#06016	BOLD:AAC4378	BIN on BOLD	BIOUG16356-B01	588	08-Aug-2013	Hymenoptera	Apidae	Bombus	Kate Perez	BIN Taxonomy Match	August
GMTPZ	GMGMC	GMGMC155-14	Specimen on BOLD	BIOUG16356-B08	GMP#06016	BOLD:AAC4378	BIN on BOLD	BIOUG16356-B08	555	08-Aug-2013	Hymenoptera	Apidae	Bombus	Kate Perez	BIN Taxonomy Match	August
GMTPZ	GMGMC	GMGMC158-14	Specimen on BOLD	BIOUG16356-B11	GMP#06016	BOLD:AAC4378	BIN on BOLD	BIOUG16356-B11	582	08-Aug-2013	Hymenoptera	Apidae	Bombus	Kate Perez	BIN Taxonomy Match	August
GMTPZ	GMGMC	GMGMC160-14	Specimen on BOLD	BIOUG16356-C01	GMP#06016	BOLD:AAC4378	BIN on BOLD	BIOUG16356-C01	588	08-Aug-2013	Hymenoptera	Apidae	Bombus	Kate Perez	BIN Taxonomy Match	August
GMTPZ	GMGMC	GMGMC166-14	Specimen on BOLD	BIOUG16356-C07	GMP#06016	BOLD:AAC4378	BIN on BOLD	BIOUG16356-C07	528	08-Aug-2013	Hymenoptera	Apidae	Bombus	Kate Perez	BIN Taxonomy Match	August
GMTPZ	GMGMC	GMGMC167-14	Specimen on BOLD	BIOUG16356-C08	GMP#06016	BOLD:AAC4378	BIN on BOLD	BIOUG16356-C08	576	08-Aug-2013	Hymenoptera	Apidae	Bombus	Kate Perez	BIN Taxonomy Match	August
GMTPZ	GMGMC	GMGMC170-14	Specimen on BOLD	BIOUG16356-C11	GMP#06016	BOLD:AAC4378	BIN on BOLD	BIOUG16356-C11	588	08-Aug-2013	Hymenoptera	Apidae	Bombus	Kate Perez	BIN Taxonomy Match	August
GMTPZ	GMGMC	GMGMC171-14	Specimen on BOLD	BIOUG16356-C12	GMP#06016	BOLD:AAC4378	BIN on BOLD	BIOUG16356-C12	567	08-Aug-2013	Hymenoptera	Apidae	Bombus	Kate Perez	BIN Taxonomy Match	August
GMTPZ	GMGMC	GMGMC180-14	Specimen on BOLD	BIOUG16356-D09	GMP#06016	BOLD:AAC4378	BIN on BOLD	BIOUG16356-D09	582	08-Aug-2013	Hymenoptera	Apidae	Bombus	Kate Perez	BIN Taxonomy Match	August
GMTPZ	GMGMC	GMGMC182-14	Specimen on BOLD	BIOUG16356-D11	GMP#06016	BOLD:AAC4378	BIN on BOLD	BIOUG16356-D11	567	08-Aug-2013	Hymenoptera	Apidae	Bombus	Kate Perez	BIN Taxonomy Match	August
GMTPZ	GMGMC	GMGMC184-14	Specimen on BOLD	BIOUG16356-E01	GMP#06016	BOLD:AAC4378	BIN on BOLD	BIOUG16356-E01	564	08-Aug-2013	Hymenoptera	Apidae	Bombus	Kate Perez	BIN Taxonomy Match	August
GMTPZ	GMGMC	GMGMC185-14	Specimen on BOLD	BIOUG16356-E02	GMP#06016	BOLD:AAC4378	BIN on BOLD	BIOUG16356-E02	588	08-Aug-2013	Hymenoptera	Apidae	Bombus	Kate Perez	BIN Taxonomy Match	August
GMTPZ	GMGMC	GMGMC192-14	Specimen on BOLD	BIOUG16356-E09	GMP#06016	BOLD:AAC4378	BIN on BOLD	BIOUG16356-E09	582	08-Aug-2013	Hymenoptera	Apidae	Bombus	Kate Perez	BIN Taxonomy Match	August
GMTPZ	GMGMC	GMGMC193-14	Specimen on BOLD	BIOUG16356-E10	GMP#06016	BOLD:AAC4378	BIN on BOLD	BIOUG16356-E10	551	08-Aug-2013	Hymenoptera	Apidae	Bombus	Kate Perez	BIN Taxonomy Match	August
GMTPZ	GMGMC	GMGMC201-14	Specimen on BOLD	BIOUG16356-F06	GMP#06016	BOLD:AAC4378	BIN on BOLD	BIOUG16356-F06	573	08-Aug-2013	Hymenoptera	Apidae	Bombus	Kate Perez	BIN Taxonomy Match	August
GMTPZ	GMGMC	GMGMC206-14	Specimen on BOLD	BIOUG16356-F11	GMP#06016	BOLD:AAC4378	BIN on BOLD	BIOUG16356-F11	582	08-Aug-2013	Hymenoptera	Apidae	Bombus	Kate Perez	BIN Taxonomy Match	August
GMTPZ	GMGMC	GMGMC210-14	Specimen on BOLD	BIOUG16356-G03	GMP#06016	BOLD:AAC4378	BIN on BOLD	BIOUG16356-G03	579	08-Aug-2013	Hymenoptera	Apidae	Bombus	Kate Perez	BIN Taxonomy Match	August
GMTPZ	GMGMC	GMGMC222-14	Specimen on BOLD	BIOUG16356-H03	GMP#06016	BOLD:AAC4378	BIN on BOLD	BIOUG16356-H03	582	08-Aug-2013	Hymenoptera	Apidae	Bombus	Kate Perez	BIN Taxonomy Match	August
GMTPZ	GMGMC	GMGMC225-14	Specimen on BOLD	BIOUG16356-H06	GMP#06016	BOLD:AAC4378	BIN on BOLD	BIOUG16356-H06	581	08-Aug-2013	Hymenoptera	Apidae	Bombus	Kate Perez	BIN Taxonomy Match	August
GMTPZ	GMGMC	GMGMC229-14	Specimen on BOLD	BIOUG16356-H10	GMP#06016	BOLD:AAC4378	BIN on BOLD	BIOUG16356-H10	582	08-Aug-2013	Hymenoptera	Apidae	Bombus	Kate Perez	BIN Taxonomy Match	August
GMTPZ	GMGMD	GMGMD161-14	Specimen on BOLD	BIOUG16607-A05	GMP#06018	BOLD:AAC4378	BIN on BOLD	BIOUG16607-A05	579	16-Sep-2013	Hymenoptera	Apidae	Bombus	Kate Perez	BIN Taxonomy Match	September
GMTPZ	GMGMD	GMGMD164-14	Specimen on BOLD	BIOUG16607-A08	GMP#06018	BOLD:AAC4378	BIN on BOLD	BIOUG16607-A08	576	16-Sep-2013	Hymenoptera	Apidae	Bombus	Kate Perez	BIN Taxonomy Match	September
GMTPZ	GMGMD	GMGMD169-14	Specimen on BOLD	BIOUG16607-B01	GMP#06018	BOLD:AAC4378	BIN on BOLD	BIOUG16607-B01	528	16-Sep-2013	Hymenoptera	Apidae	Bombus	Kate Perez	BIN Taxonomy Match	September
GMTPZ	GMGMD	GMGMD172-14	Specimen on BOLD	BIOUG16607-B04	GMP#06018	BOLD:AAC4378	BIN on BOLD	BIOUG16607-B04	554	16-Sep-2013	Hymenoptera	Apidae	Bombus	Kate Perez	BIN Taxonomy Match	September
GMTPZ	GMGMD	GMGMD179-14	Specimen on BOLD	BIOUG16607-B11	GMP#06018	BOLD:AAC4378	BIN on BOLD	BIOUG16607-B11	579	16-Sep-2013	Hymenoptera	Apidae	Bombus	Kate Perez	BIN Taxonomy Match	September
GMTPZ	GMGMD	GMGMD192-14	Specimen on BOLD	BIOUG16607-C12	GMP#06018	BOLD:AAC4378	BIN on BOLD	BIOUG16607-C12	542	16-Sep-2013	Hymenoptera	Apidae	Bombus	Kate Perez	BIN Taxonomy Match	September
GMTPZ	GMGMD	GMGMD204-14	Specimen on BOLD	BIOUG16607-D12	GMP#06018	BOLD:AAC4378	BIN on BOLD	BIOUG16607-D12	582	16-Sep-2013	Hymenoptera	Apidae	Bombus	Kate Perez	BIN Taxonomy Match	September
GMTPZ	GMGMD	GMGMD247-14	Specimen on BOLD	BIOUG16607-H07	GMP#06018	BOLD:AAC4378	BIN on BOLD	BIOUG16607-H07	571	16-Sep-2013	Hymenoptera	Apidae	Bombus	Kate Perez	BIN Taxonomy Match	September
GMTPZ	GMGMI	GMGMI033-14	Specimen on BOLD	BIOUG17084-C04	GMP#06024	BOLD:AAC4378	BIN on BOLD	BIOUG17084-C04	582	16-May-2014	Hymenoptera	Apidae	Bombus	Kate Perez	BIN Taxonomy Match	May
GMTPZ	GMGMI	GMGMI034-14	Specimen on BOLD	BIOUG17084-C05	GMP#06024	BOLD:AAC4378	BIN on BOLD	BIOUG17084-C05	582	16-May-2014	Hymenoptera	Apidae	Bombus	Kate Perez	BIN Taxonomy Match	May
GMTPZ	GMGMI	GMGMI039-14	Specimen on BOLD	BIOUG17084-C10	GMP#06024	BOLD:AAC4378	BIN on BOLD	BIOUG17084-C10	579	16-May-2014	Hymenoptera	Apidae	Bombus	Kate Perez	BIN Taxonomy Match	May
GMTPZ	GMGMI	GMGMI042-14	Specimen on BOLD	BIOUG17084-D01	GMP#06024	BOLD:AAC4378	BIN on BOLD	BIOUG17084-D01	543	16-May-2014	Hymenoptera	Apidae	Bombus	Kate Perez	BIN Taxonomy Match	May
GMTPZ	GMGMI	GMGMI050-14	Specimen on BOLD	BIOUG17084-D09	GMP#06024	BOLD:AAC4378	BIN on BOLD	BIOUG17084-D09	576	16-May-2014	Hymenoptera	Apidae	Bombus	Kate Perez	BIN Taxonomy Match	May
GMTPZ	GMGMI	GMGMI054-14	Specimen on BOLD	BIOUG17084-E01	GMP#06024	BOLD:AAC4378	BIN on BOLD	BIOUG17084-E01	546	16-May-2014	Hymenoptera	Apidae	Bombus	Kate Perez	BIN Taxonomy Match	May
GMTPZ	GMGMI	GMGMI055-14	Specimen on BOLD	BIOUG17084-E02	GMP#06024	BOLD:AAC4378	BIN on BOLD	BIOUG17084-E02	582	16-May-2014	Hymenoptera	Apidae	Bombus	Kate Perez	BIN Taxonomy Match	May
GMTPZ	GMGMI	GMGMI056-14	Specimen on BOLD	BIOUG17084-E03	GMP#06024	BOLD:AAC4378	BIN on BOLD	BIOUG17084-E03	579	16-May-2014	Hymenoptera	Apidae	Bombus	Kate Perez	BIN Taxonomy Match	May
GMTPZ	GMGMI	GMGMI058-14	Specimen on BOLD	BIOUG17084-E05	GMP#06024	BOLD:AAC4378	BIN on BOLD	BIOUG17084-E05	579	16-May-2014	Hymenoptera	Apidae	Bombus	Kate Perez	BIN Taxonomy Match	May
GMTPZ	GMGMI	GMGMI081-14	Specimen on BOLD	BIOUG17084-G04	GMP#06024	BOLD:AAC4378	BIN on BOLD	BIOUG17084-G04	546	16-May-2014	Hymenoptera	Apidae	Bombus	Kate Perez	BIN Taxonomy Match	May
GMTPZ	GMGMI	GMGMI092-14	Specimen on BOLD	BIOUG17084-H03	GMP#06024	BOLD:AAC4378	BIN on BOLD	BIOUG17084-H03	564	16-May-2014	Hymenoptera	Apidae	Bombus	Kate Perez	BIN Taxonomy Match	May
GMTPZ	GMGMJ	GMGMJ058-14	Specimen on BOLD	BIOUG17068-D01	GMP#06025	BOLD:AAC4378	BIN on BOLD	BIOUG17068-D01	588	02-Jun-2014	Hymenoptera	Apidae	Bombus	Kate Perez	BIN Taxonomy Match	June
GMTPZ	GMGMJ	GMGMJ060-14	Specimen on BOLD	BIOUG17068-D03	GMP#06025	BOLD:AAC4378	BIN on BOLD	BIOUG17068-D03	577	02-Jun-2014	Hymenoptera	Apidae	Bombus	Kate Perez	BIN Taxonomy Match	June
GMTPZ	GMGMJ	GMGMJ061-14	Specimen on BOLD	BIOUG17068-D04	GMP#06025	BOLD:AAC4378	BIN on BOLD	BIOUG17068-D04	588	02-Jun-2014	Hymenoptera	Apidae	Bombus	Kate Perez	BIN Taxonomy Match	June
GMTPZ	GMGMJ	GMGMJ066-14	Specimen on BOLD	BIOUG17068-D09	GMP#06025	BOLD:AAC4378	BIN on BOLD	BIOUG17068-D09	567	02-Jun-2014	Hymenoptera	Apidae	Bombus	Kate Perez	BIN Taxonomy Match	June
GMTPZ	GMGMJ	GMGMJ069-14	Specimen on BOLD	BIOUG17068-D12	GMP#06025	BOLD:AAC4378	BIN on BOLD	BIOUG17068-D12	562	02-Jun-2014	Hymenoptera	Apidae	Bombus	Kate Perez	BIN Taxonomy Match	June
GMTPZ	GMGMJ	GMGMJ070-14	Specimen on BOLD	BIOUG17068-E01	GMP#06025	BOLD:AAC4378	BIN on BOLD	BIOUG17068-E01	554	02-Jun-2014	Hymenoptera	Apidae	Bombus	Kate Perez	BIN Taxonomy Match	June
GMTPZ	GMGMJ	GMGMJ072-14	Specimen on BOLD	BIOUG17068-E03	GMP#06025	BOLD:AAC4378	BIN on BOLD	BIOUG17068-E03	561	02-Jun-2014	Hymenoptera	Apidae	Bombus	Kate Perez	BIN Taxonomy Match	June
GMTPZ	GMGMJ	GMGMJ074-14	Specimen on BOLD	BIOUG17068-E05	GMP#06025	BOLD:AAC4378	BIN on BOLD	BIOUG17068-E05	573	02-Jun-2014	Hymenoptera	Apidae	Bombus	Kate Perez	BIN Taxonomy Match	June
GMTPZ	GMGMJ	GMGMJ075-14	Specimen on BOLD	BIOUG17068-E06	GMP#06025	BOLD:AAC4378	BIN on BOLD	BIOUG17068-E06	531	02-Jun-2014	Hymenoptera	Apidae	Bombus	Kate Perez	BIN Taxonomy Match	June
GMTPZ	GMGMJ	GMGMJ076-14	Specimen on BOLD	BIOUG17068-E07	GMP#06025	BOLD:AAC4378	BIN on BOLD	BIOUG17068-E07	553	02-Jun-2014	Hymenoptera	Apidae	Bombus	Kate Perez	BIN Taxonomy Match	June
GMTPZ	GMGMJ	GMGMJ086-14	Specimen on BOLD	BIOUG17068-F05	GMP#06025	BOLD:AAC4378	BIN on BOLD	BIOUG17068-F05	504	02-Jun-2014	Hymenoptera	Apidae	Bombus	Kate Perez	BIN Taxonomy Match	June
GMTPZ	GMGMJ	GMGMJ091-14	Specimen on BOLD	BIOUG17068-F10	GMP#06025	BOLD:AAC4378	BIN on BOLD	BIOUG17068-F10	572	02-Jun-2014	Hymenoptera	Apidae	Bombus	Kate Perez	BIN Taxonomy Match	June
GMTPZ	GMGMJ	GMGMJ093-14	Specimen on BOLD	BIOUG17068-F12	GMP#06025	BOLD:AAC4378	BIN on BOLD	BIOUG17068-F12	566	02-Jun-2014	Hymenoptera	Apidae	Bombus	Kate Perez	BIN Taxonomy Match	June
GMTPZ	GMGMJ	GMGMJ096-14	Specimen on BOLD	BIOUG17068-G03	GMP#06025	BOLD:AAC4378	BIN on BOLD	BIOUG17068-G03	579	02-Jun-2014	Hymenoptera	Apidae	Bombus	Kate Perez	BIN Taxonomy Match	June
GMTPZ	GMGMJ	GMGMJ102-14	Specimen on BOLD	BIOUG17068-G09	GMP#06025	BOLD:AAC4378	BIN on BOLD	BIOUG17068-G09	501	02-Jun-2014	Hymenoptera	Apidae	Bombus	Kate Perez	BIN Taxonomy Match	June
GMTPZ	GMGMJ	GMGMJ321-14	Specimen on BOLD	BIOUG17071-B03	GMP#06025	BOLD:AAC4378	BIN on BOLD	BIOUG17071-B03	588	02-Jun-2014	Hymenoptera	Apidae	Bombus	Kate Perez	BIN Taxonomy Match	June
GMTPZ	GMGMK	GMGMK100-14	Specimen on BOLD	BIOUG17173-B09	GMP#06026	BOLD:AAC4378	BIN on BOLD	BIOUG17173-B09	517	17-Jun-2014	Hymenoptera	Apidae	Bombus	Kate Perez	BIN Taxonomy Match	June
GMTPZ	GMGMK	GMGMK101-14	Specimen on BOLD	BIOUG17173-B10	GMP#06026	BOLD:AAC4378	BIN on BOLD	BIOUG17173-B10	588	17-Jun-2014	Hymenoptera	Apidae	Bombus	Kate Perez	BIN Taxonomy Match	June
GMTPZ	GMGMK	GMGMK103-14	Specimen on BOLD	BIOUG17173-B12	GMP#06026	BOLD:AAC4378	BIN on BOLD	BIOUG17173-B12	554	17-Jun-2014	Hymenoptera	Apidae	Bombus	Kate Perez	BIN Taxonomy Match	June
GMTPZ	GMGMK	GMGMK144-14	Specimen on BOLD	BIOUG17173-F05	GMP#06026	BOLD:AAC4378	BIN on BOLD	BIOUG17173-F05	588	17-Jun-2014	Hymenoptera	Apidae	Bombus	Kate Perez	BIN Taxonomy Match	June
GMTPZ	GMGMK	GMGMK147-14	Specimen on BOLD	BIOUG17173-F08	GMP#06026	BOLD:AAC4378	BIN on BOLD	BIOUG17173-F08	532	17-Jun-2014	Hymenoptera	Apidae	Bombus	Kate Perez	BIN Taxonomy Match	June
GMTPZ	GMGMK	GMGMK149-14	Specimen on BOLD	BIOUG17173-F10	GMP#06026	BOLD:AAC4378	BIN on BOLD	BIOUG17173-F10	563	17-Jun-2014	Hymenoptera	Apidae	Bombus	Kate Perez	BIN Taxonomy Match	June
GMTPZ	GMGMK	GMGMK150-14	Specimen on BOLD	BIOUG17173-F11	GMP#06026	BOLD:AAC4378	BIN on BOLD	BIOUG17173-F11	555	17-Jun-2014	Hymenoptera	Apidae	Bombus	Kate Perez	BIN Taxonomy Match	June
GMTPZ	GMGMK	GMGMK153-14	Specimen on BOLD	BIOUG17173-G02	GMP#06026	BOLD:AAC4378	BIN on BOLD	BIOUG17173-G02	579	17-Jun-2014	Hymenoptera	Apidae	Bombus	Kate Perez	BIN Taxonomy Match	June
GMTPZ	GMGMK	GMGMK155-14	Specimen on BOLD	BIOUG17173-G04	GMP#06026	BOLD:AAC4378	BIN on BOLD	BIOUG17173-G04	521	17-Jun-2014	Hymenoptera	Apidae	Bombus	Kate Perez	BIN Taxonomy Match	June
GMTPZ	GMGMK	GMGMK167-14	Specimen on BOLD	BIOUG17173-H04	GMP#06026	BOLD:AAC4378	BIN on BOLD	BIOUG17173-H04	534	17-Jun-2014	Hymenoptera	Apidae	Bombus	Kate Perez	BIN Taxonomy Match	June
GMTPZ	GMGMK	GMGMK258-14	Specimen on BOLD	BIOUG17174-G12	GMP#06026	BOLD:AAC4378	BIN on BOLD	BIOUG17174-G12	557	17-Jun-2014	Hymenoptera	Apidae	Bombus	Kate Perez	BIN Taxonomy Match	June
GMTPZ	GMGML	GMGML129-14	Specimen on BOLD	BIOUG17229-C06	GMP#06027	BOLD:AAC4378	BIN on BOLD	BIOUG17229-C06	609	01-Jul-2014	Hymenoptera	Apidae	Bombus	Kate Perez	BIN Taxonomy Match	July
GMTPZ	GMGML	GMGML131-14	Specimen on BOLD	BIOUG17229-C08	GMP#06027	BOLD:AAC4378	BIN on BOLD	BIOUG17229-C08	532	01-Jul-2014	Hymenoptera	Apidae	Bombus	Kate Perez	BIN Taxonomy Match	July
GMTPZ	GMGML	GMGML133-14	Specimen on BOLD	BIOUG17229-C10	GMP#06027	BOLD:AAC4378	BIN on BOLD	BIOUG17229-C10	537	01-Jul-2014	Hymenoptera	Apidae	Bombus	Kate Perez	BIN Taxonomy Match	July
GMTPZ	GMGML	GMGML142-14	Specimen on BOLD	BIOUG17229-D07	GMP#06027	BOLD:AAC4378	BIN on BOLD	BIOUG17229-D07	618	01-Jul-2014	Hymenoptera	Apidae	Bombus	Kate Perez	BIN Taxonomy Match	July
GMTPZ	GMGML	GMGML148-14	Specimen on BOLD	BIOUG17229-E01	GMP#06027	BOLD:AAC4378	BIN on BOLD	BIOUG17229-E01	554	01-Jul-2014	Hymenoptera	Apidae	Bombus	Kate Perez	BIN Taxonomy Match	July
GMTPZ	GMGML	GMGML160-14	Specimen on BOLD	BIOUG17229-F01	GMP#06027	BOLD:AAC4378	BIN on BOLD	BIOUG17229-F01	588	01-Jul-2014	Hymenoptera	Apidae	Bombus	Kate Perez	BIN Taxonomy Match	July
GMTPZ	GMGML	GMGML165-14	Specimen on BOLD	BIOUG17229-F06	GMP#06027	BOLD:AAC4378	BIN on BOLD	BIOUG17229-F06	564	01-Jul-2014	Hymenoptera	Apidae	Bombus	Kate Perez	BIN Taxonomy Match	July
GMTPZ	GMGML	GMGML170-14	Specimen on BOLD	BIOUG17229-F11	GMP#06027	BOLD:AAC4378	BIN on BOLD	BIOUG17229-F11	609	01-Jul-2014	Hymenoptera	Apidae	Bombus	Kate Perez	BIN Taxonomy Match	July
GMTPZ	GMGMN	GMGMN022-14	Specimen on BOLD	BIOUG17299-F10	GMP#06029	BOLD:AAC4378	BIN on BOLD	BIOUG17299-F10	522	29-Jul-2014	Hymenoptera	Apidae	Bombus	Kate Perez	BIN Taxonomy Match	July
GMTPZ	GMGMN	GMGMN040-14	Specimen on BOLD	BIOUG17299-H04	GMP#06029	BOLD:AAC4378	BIN on BOLD	BIOUG17299-H04	565	29-Jul-2014	Hymenoptera	Apidae	Bombus	Kate Perez	BIN Taxonomy Match	July
GMTPZ	GMGMN	GMGMN156-14	Specimen on BOLD	BIOUG17382-A10	GMP#06029	BOLD:AAC4378	BIN on BOLD	BIOUG17382-A10	567	29-Jul-2014	Hymenoptera	Apidae	Bombus	Kate Perez	BIN Taxonomy Match	July
GMTPZ	GMGMA	GMGMA417-14	Specimen on BOLD	BIOUG16209-C06	GMP#06015	BOLD:AAC6016	BIN on BOLD	BIOUG16209-C06	612	25-Jul-2013	Hymenoptera	Apidae	Bombus	Kate Perez	BIN Taxonomy Match	July
GMTPZ	GMGMA	GMGMA425-14	Specimen on BOLD	BIOUG16209-D02	GMP#06015	BOLD:AAC6016	BIN on BOLD	BIOUG16209-D02	589	25-Jul-2013	Hymenoptera	Apidae	Bombus	Kate Perez	BIN Taxonomy Match	July
GMTPZ	GMGMA	GMGMA451-14	Specimen on BOLD	BIOUG16209-F04	GMP#06015	BOLD:AAC6016	BIN on BOLD	BIOUG16209-F04	609	25-Jul-2013	Hymenoptera	Apidae	Bombus	Kate Perez	BIN Taxonomy Match	July
GMTPZ	GMGMA	GMGMA460-14	Specimen on BOLD	BIOUG16209-G01	GMP#06015	BOLD:AAC6016	BIN on BOLD	BIOUG16209-G01	630	25-Jul-2013	Hymenoptera	Apidae	Bombus	Kate Perez	BIN Taxonomy Match	July
GMTPZ	GMGMA	GMGMA463-14	Specimen on BOLD	BIOUG16209-G04	GMP#06015	BOLD:AAC6016	BIN on BOLD	BIOUG16209-G04	608	25-Jul-2013	Hymenoptera	Apidae	Bombus	Kate Perez	BIN Taxonomy Match	July
GMTPZ	GMGMA	GMGMA472-14	Specimen on BOLD	BIOUG16209-H01	GMP#06015	BOLD:AAC6016	BIN on BOLD	BIOUG16209-H01	611	25-Jul-2013	Hymenoptera	Apidae	Bombus	Kate Perez	BIN Taxonomy Match	July
GMTPZ	GMGMA	GMGMA474-14	Specimen on BOLD	BIOUG16209-H03	GMP#06015	BOLD:AAC6016	BIN on BOLD	BIOUG16209-H03	581	25-Jul-2013	Hymenoptera	Apidae	Bombus	Kate Perez	BIN Taxonomy Match	July
GMTPZ	GMGMA	GMGMA545-14	Specimen on BOLD	BIOUG16210-F03	GMP#06015	BOLD:AAC6016	BIN on BOLD	BIOUG16210-F03	596	25-Jul-2013	Hymenoptera	Apidae	Bombus	Kate Perez	BIN Taxonomy Match	July
GMTPZ	GMGMA	GMGMA548-14	Specimen on BOLD	BIOUG16210-F06	GMP#06015	BOLD:AAC6016	BIN on BOLD	BIOUG16210-F06	607	25-Jul-2013	Hymenoptera	Apidae	Bombus	Kate Perez	BIN Taxonomy Match	July
GMTPZ	GMGMA	GMGMA598-14	Specimen on BOLD	BIOUG16211-B09	GMP#06015	BOLD:AAC6016	BIN on BOLD	BIOUG16211-B09	630	25-Jul-2013	Hymenoptera	Apidae	Bombus	Kate Perez	BIN Taxonomy Match	July
GMTPZ	GMGMA	GMGMA613-14	Specimen on BOLD	BIOUG16211-C12	GMP#06015	BOLD:AAC6016	BIN on BOLD	BIOUG16211-C12	605	25-Jul-2013	Hymenoptera	Apidae	Bombus	Kate Perez	BIN Taxonomy Match	July
GMTPZ	GMGMB	GMGMB503-14	Specimen on BOLD	BIOUG16273-A03	GMP#06017	BOLD:AAC6016	BIN on BOLD	BIOUG16273-A03	588	26-Aug-2013	Hymenoptera	Apidae	Bombus	Kate Perez	BIN Taxonomy Match	August
GMTPZ	GMGMB	GMGMB506-14	Specimen on BOLD	BIOUG16273-A06	GMP#06017	BOLD:AAC6016	BIN on BOLD	BIOUG16273-A06	588	26-Aug-2013	Hymenoptera	Apidae	Bombus	Kate Perez	BIN Taxonomy Match	August
GMTPZ	GMGMB	GMGMB507-14	Specimen on BOLD	BIOUG16273-A07	GMP#06017	BOLD:AAC6016	BIN on BOLD	BIOUG16273-A07	588	26-Aug-2013	Hymenoptera	Apidae	Bombus	Kate Perez	BIN Taxonomy Match	August
GMTPZ	GMGMB	GMGMB508-14	Specimen on BOLD	BIOUG16273-A08	GMP#06017	BOLD:AAC6016	BIN on BOLD	BIOUG16273-A08	591	26-Aug-2013	Hymenoptera	Apidae	Bombus	Kate Perez	BIN Taxonomy Match	August
GMTPZ	GMGMB	GMGMB513-14	Specimen on BOLD	BIOUG16273-B01	GMP#06017	BOLD:AAC6016	BIN on BOLD	BIOUG16273-B01	588	26-Aug-2013	Hymenoptera	Apidae	Bombus	Kate Perez	BIN Taxonomy Match	August
GMTPZ	GMGMB	GMGMB514-14	Specimen on BOLD	BIOUG16273-B02	GMP#06017	BOLD:AAC6016	BIN on BOLD	BIOUG16273-B02	540	26-Aug-2013	Hymenoptera	Apidae	Bombus	Kate Perez	BIN Taxonomy Match	August
GMTPZ	GMGMB	GMGMB515-14	Specimen on BOLD	BIOUG16273-B03	GMP#06017	BOLD:AAC6016	BIN on BOLD	BIOUG16273-B03	591	26-Aug-2013	Hymenoptera	Apidae	Bombus	Kate Perez	BIN Taxonomy Match	August
GMTPZ	GMGMB	GMGMB517-14	Specimen on BOLD	BIOUG16273-B05	GMP#06017	BOLD:AAC6016	BIN on BOLD	BIOUG16273-B05	591	26-Aug-2013	Hymenoptera	Apidae	Bombus	Kate Perez	BIN Taxonomy Match	August
GMTPZ	GMGMB	GMGMB521-14	Specimen on BOLD	BIOUG16273-B09	GMP#06017	BOLD:AAC6016	BIN on BOLD	BIOUG16273-B09	591	26-Aug-2013	Hymenoptera	Apidae	Bombus	Kate Perez	BIN Taxonomy Match	August
GMTPZ	GMGMB	GMGMB527-14	Specimen on BOLD	BIOUG16273-C03	GMP#06017	BOLD:AAC6016	BIN on BOLD	BIOUG16273-C03	588	26-Aug-2013	Hymenoptera	Apidae	Bombus	Kate Perez	BIN Taxonomy Match	August
GMTPZ	GMGMB	GMGMB532-14	Specimen on BOLD	BIOUG16273-C08	GMP#06017	BOLD:AAC6016	BIN on BOLD	BIOUG16273-C08	579	26-Aug-2013	Hymenoptera	Apidae	Bombus	Kate Perez	BIN Taxonomy Match	August
GMTPZ	GMGMB	GMGMB533-14	Specimen on BOLD	BIOUG16273-C09	GMP#06017	BOLD:AAC6016	BIN on BOLD	BIOUG16273-C09	588	26-Aug-2013	Hymenoptera	Apidae	Bombus	Kate Perez	BIN Taxonomy Match	August
GMTPZ	GMGMB	GMGMB534-14	Specimen on BOLD	BIOUG16273-C10	GMP#06017	BOLD:AAC6016	BIN on BOLD	BIOUG16273-C10	546	26-Aug-2013	Hymenoptera	Apidae	Bombus	Kate Perez	BIN Taxonomy Match	August
GMTPZ	GMGMB	GMGMB542-14	Specimen on BOLD	BIOUG16273-D06	GMP#06017	BOLD:AAC6016	BIN on BOLD	BIOUG16273-D06	591	26-Aug-2013	Hymenoptera	Apidae	Bombus	Kate Perez	BIN Taxonomy Match	August
GMTPZ	GMGMB	GMGMB547-14	Specimen on BOLD	BIOUG16273-D11	GMP#06017	BOLD:AAC6016	BIN on BOLD	BIOUG16273-D11	588	26-Aug-2013	Hymenoptera	Apidae	Bombus	Kate Perez	BIN Taxonomy Match	August
GMTPZ	GMGMB	GMGMB550-14	Specimen on BOLD	BIOUG16273-E02	GMP#06017	BOLD:AAC6016	BIN on BOLD	BIOUG16273-E02	588	26-Aug-2013	Hymenoptera	Apidae	Bombus	Kate Perez	BIN Taxonomy Match	August
GMTPZ	GMGMB	GMGMB551-14	Specimen on BOLD	BIOUG16273-E03	GMP#06017	BOLD:AAC6016	BIN on BOLD	BIOUG16273-E03	588	26-Aug-2013	Hymenoptera	Apidae	Bombus	Kate Perez	BIN Taxonomy Match	August
GMTPZ	GMGMB	GMGMB554-14	Specimen on BOLD	BIOUG16273-E06	GMP#06017	BOLD:AAC6016	BIN on BOLD	BIOUG16273-E06	591	26-Aug-2013	Hymenoptera	Apidae	Bombus	Kate Perez	BIN Taxonomy Match	August
GMTPZ	GMGMC	GMGMC142-14	Specimen on BOLD	BIOUG16356-A07	GMP#06016	BOLD:AAC6016	BIN on BOLD	BIOUG16356-A07	576	08-Aug-2013	Hymenoptera	Apidae	Bombus	Kate Perez	BIN Taxonomy Match	August
GMTPZ	GMGMC	GMGMC150-14	Specimen on BOLD	BIOUG16356-B03	GMP#06016	BOLD:AAC6016	BIN on BOLD	BIOUG16356-B03	591	08-Aug-2013	Hymenoptera	Apidae	Bombus	Kate Perez	BIN Taxonomy Match	August
GMTPZ	GMGMC	GMGMC156-14	Specimen on BOLD	BIOUG16356-B09	GMP#06016	BOLD:AAC6016	BIN on BOLD	BIOUG16356-B09	546	08-Aug-2013	Hymenoptera	Apidae	Bombus	Kate Perez	BIN Taxonomy Match	August
GMTPZ	GMGMC	GMGMC159-14	Specimen on BOLD	BIOUG16356-B12	GMP#06016	BOLD:AAC6016	BIN on BOLD	BIOUG16356-B12	555	08-Aug-2013	Hymenoptera	Apidae	Bombus	Kate Perez	BIN Taxonomy Match	August
GMTPZ	GMGMC	GMGMC164-14	Specimen on BOLD	BIOUG16356-C05	GMP#06016	BOLD:AAC6016	BIN on BOLD	BIOUG16356-C05	582	08-Aug-2013	Hymenoptera	Apidae	Bombus	Kate Perez	BIN Taxonomy Match	August
GMTPZ	GMGMC	GMGMC169-14	Specimen on BOLD	BIOUG16356-C10	GMP#06016	BOLD:AAC6016	BIN on BOLD	BIOUG16356-C10	555	08-Aug-2013	Hymenoptera	Apidae	Bombus	Kate Perez	BIN Taxonomy Match	August
GMTPZ	GMGMC	GMGMC181-14	Specimen on BOLD	BIOUG16356-D10	GMP#06016	BOLD:AAC6016	BIN on BOLD	BIOUG16356-D10	588	08-Aug-2013	Hymenoptera	Apidae	Bombus	Kate Perez	BIN Taxonomy Match	August
GMTPZ	GMGMC	GMGMC202-14	Specimen on BOLD	BIOUG16356-F07	GMP#06016	BOLD:AAC6016	BIN on BOLD	BIOUG16356-F07	582	08-Aug-2013	Hymenoptera	Apidae	Bombus	Kate Perez	BIN Taxonomy Match	August
GMTPZ	GMGMC	GMGMC216-14	Specimen on BOLD	BIOUG16356-G09	GMP#06016	BOLD:AAC6016	BIN on BOLD	BIOUG16356-G09	552	08-Aug-2013	Hymenoptera	Apidae	Bombus	Kate Perez	BIN Taxonomy Match	August
GMTPZ	GMGMC	GMGMC218-14	Specimen on BOLD	BIOUG16356-G11	GMP#06016	BOLD:AAC6016	BIN on BOLD	BIOUG16356-G11	546	08-Aug-2013	Hymenoptera	Apidae	Bombus	Kate Perez	BIN Taxonomy Match	August
GMTPZ	GMGMC	GMGMC219-14	Specimen on BOLD	BIOUG16356-G12	GMP#06016	BOLD:AAC6016	BIN on BOLD	BIOUG16356-G12	588	08-Aug-2013	Hymenoptera	Apidae	Bombus	Kate Perez	BIN Taxonomy Match	August
GMTPZ	GMGMC	GMGMC227-14	Specimen on BOLD	BIOUG16356-H08	GMP#06016	BOLD:AAC6016	BIN on BOLD	BIOUG16356-H08	579	08-Aug-2013	Hymenoptera	Apidae	Bombus	Kate Perez	BIN Taxonomy Match	August
GMTPZ	GMGMD	GMGMD158-14	Specimen on BOLD	BIOUG16607-A02	GMP#06018	BOLD:AAC6016	BIN on BOLD	BIOUG16607-A02	579	16-Sep-2013	Hymenoptera	Apidae	Bombus	Kate Perez	BIN Taxonomy Match	September
GMTPZ	GMGMJ	GMGMJ078-14	Specimen on BOLD	BIOUG17068-E09	GMP#06025	BOLD:AAC6016	BIN on BOLD	BIOUG17068-E09	555	02-Jun-2014	Hymenoptera	Apidae	Bombus	Kate Perez	BIN Taxonomy Match	June
GMTPZ	GMGMJ	GMGMJ094-14	Specimen on BOLD	BIOUG17068-G01	GMP#06025	BOLD:AAC6016	BIN on BOLD	BIOUG17068-G01	564	02-Jun-2014	Hymenoptera	Apidae	Bombus	Kate Perez	BIN Taxonomy Match	June
GMTPZ	GMGMK	GMGMK093-14	Specimen on BOLD	BIOUG17173-B02	GMP#06026	BOLD:AAC6016	BIN on BOLD	BIOUG17173-B02	588	17-Jun-2014	Hymenoptera	Apidae	Bombus	Kate Perez	BIN Taxonomy Match	June
GMTPZ	GMGMK	GMGMK111-14	Specimen on BOLD	BIOUG17173-C08	GMP#06026	BOLD:AAC6016	BIN on BOLD	BIOUG17173-C08	564	17-Jun-2014	Hymenoptera	Apidae	Bombus	Kate Perez	BIN Taxonomy Match	June
GMTPZ	GMGMK	GMGMK140-14	Specimen on BOLD	BIOUG17173-F01	GMP#06026	BOLD:AAC6016	BIN on BOLD	BIOUG17173-F01	564	17-Jun-2014	Hymenoptera	Apidae	Bombus	Kate Perez	BIN Taxonomy Match	June
GMTPZ	GMGML	GMGML103-14	Specimen on BOLD	BIOUG17229-A04	GMP#06027	BOLD:AAC6016	BIN on BOLD	BIOUG17229-A04	588	01-Jul-2014	Hymenoptera	Apidae	Bombus	Kate Perez	BIN Taxonomy Match	July
GMTPZ	GMGML	GMGML111-14	Specimen on BOLD	BIOUG17229-A12	GMP#06027	BOLD:AAC6016	BIN on BOLD	BIOUG17229-A12	609	01-Jul-2014	Hymenoptera	Apidae	Bombus	Kate Perez	BIN Taxonomy Match	July
GMTPZ	GMGML	GMGML136-14	Specimen on BOLD	BIOUG17229-D01	GMP#06027	BOLD:AAC6016	BIN on BOLD	BIOUG17229-D01	555	01-Jul-2014	Hymenoptera	Apidae	Bombus	Kate Perez	BIN Taxonomy Match	July
GMTPZ	GMGML	GMGML138-14	Specimen on BOLD	BIOUG17229-D03	GMP#06027	BOLD:AAC6016	BIN on BOLD	BIOUG17229-D03	579	01-Jul-2014	Hymenoptera	Apidae	Bombus	Kate Perez	BIN Taxonomy Match	July
GMTPZ	GMGMM	GMGMM128-14	Specimen on BOLD	BIOUG17297-C07	GMP#06028	BOLD:AAC6016	BIN on BOLD	BIOUG17297-C07	600	15-Jul-2014	Hymenoptera	Apidae	Bombus	Kate Perez	BIN Taxonomy Match	July
GMTPZ	GMGMM	GMGMM149-14	Specimen on BOLD	BIOUG17297-E04	GMP#06028	BOLD:AAC6016	BIN on BOLD	BIOUG17297-E04	604	15-Jul-2014	Hymenoptera	Apidae	Bombus	Kate Perez	BIN Taxonomy Match	July
GMTPZ	GMGMM	GMGMM162-14	Specimen on BOLD	BIOUG17297-F05	GMP#06028	BOLD:AAC6016	BIN on BOLD	BIOUG17297-F05	606	15-Jul-2014	Hymenoptera	Apidae	Bombus	Kate Perez	BIN Taxonomy Match	July
GMTPZ	GMGMM	GMGMM185-14	Specimen on BOLD	BIOUG17297-H04	GMP#06028	BOLD:AAC6016	BIN on BOLD	BIOUG17297-H04	599	15-Jul-2014	Hymenoptera	Apidae	Bombus	Kate Perez	BIN Taxonomy Match	July
GMTPZ	GMGMM	GMGMM192-14	Specimen on BOLD	BIOUG17297-H11	GMP#06028	BOLD:AAC6016	BIN on BOLD	BIOUG17297-H11	598	15-Jul-2014	Hymenoptera	Apidae	Bombus	Kate Perez	BIN Taxonomy Match	July
GMTPZ	GMGMN	GMGMN010-14	Specimen on BOLD	BIOUG17299-E10	GMP#06029	BOLD:AAC6016	BIN on BOLD	BIOUG17299-E10	573	29-Jul-2014	Hymenoptera	Apidae	Bombus	Kate Perez	BIN Taxonomy Match	July
GMTPZ	GMGMN	GMGMN011-14	Specimen on BOLD	BIOUG17299-E11	GMP#06029	BOLD:AAC6016	BIN on BOLD	BIOUG17299-E11	579	29-Jul-2014	Hymenoptera	Apidae	Bombus	Kate Perez	BIN Taxonomy Match	July
GMTPZ	GMGMN	GMGMN015-14	Specimen on BOLD	BIOUG17299-F03	GMP#06029	BOLD:AAC6016	BIN on BOLD	BIOUG17299-F03	582	29-Jul-2014	Hymenoptera	Apidae	Bombus	Kate Perez	BIN Taxonomy Match	July
GMTPZ	GMGMN	GMGMN018-14	Specimen on BOLD	BIOUG17299-F06	GMP#06029	BOLD:AAC6016	BIN on BOLD	BIOUG17299-F06	525	29-Jul-2014	Hymenoptera	Apidae	Bombus	Kate Perez	Tree base identification	July
GMTPZ	GMGMN	GMGMN028-14	Specimen on BOLD	BIOUG17299-G04	GMP#06029	BOLD:AAC6016	BIN on BOLD	BIOUG17299-G04	579	29-Jul-2014	Hymenoptera	Apidae	Bombus	Kate Perez	BIN Taxonomy Match	July
GMTPZ	GMGMN	GMGMN031-14	Specimen on BOLD	BIOUG17299-G07	GMP#06029	BOLD:AAC6016	BIN on BOLD	BIOUG17299-G07	573	29-Jul-2014	Hymenoptera	Apidae	Bombus	Kate Perez	BIN Taxonomy Match	July
GMTPZ	GMGMN	GMGMN032-14	Specimen on BOLD	BIOUG17299-G08	GMP#06029	BOLD:AAC6016	BIN on BOLD	BIOUG17299-G08	567	29-Jul-2014	Hymenoptera	Apidae	Bombus	Kate Perez	BIN Taxonomy Match	July
GMTPZ	GMGMN	GMGMN033-14	Specimen on BOLD	BIOUG17299-G09	GMP#06029	BOLD:AAC6016	BIN on BOLD	BIOUG17299-G09	582	29-Jul-2014	Hymenoptera	Apidae	Bombus	Kate Perez	BIN Taxonomy Match	July
GMTPZ	GMGMN	GMGMN038-14	Specimen on BOLD	BIOUG17299-H02	GMP#06029	BOLD:AAC6016	BIN on BOLD	BIOUG17299-H02	552	29-Jul-2014	Hymenoptera	Apidae	Bombus	Kate Perez	BIN Taxonomy Match	July
GMTPZ	GMGMN	GMGMN039-14	Specimen on BOLD	BIOUG17299-H03	GMP#06029	BOLD:AAC6016	BIN on BOLD	BIOUG17299-H03	564	29-Jul-2014	Hymenoptera	Apidae	Bombus	Kate Perez	BIN Taxonomy Match	July
GMTPZ	GMGMN	GMGMN157-14	Specimen on BOLD	BIOUG17382-A11	GMP#06029	BOLD:AAC6016	BIN on BOLD	BIOUG17382-A11	588	29-Jul-2014	Hymenoptera	Apidae	Bombus	Kate Perez	BIN Taxonomy Match	July
GMTPZ	GMGMN	GMGMN163-14	Specimen on BOLD	BIOUG17382-B05	GMP#06029	BOLD:AAC6016	BIN on BOLD	BIOUG17382-B05	588	29-Jul-2014	Hymenoptera	Apidae	Bombus	Kate Perez	BIN Taxonomy Match	July
GMTPZ	GMGMN	GMGMN275-14	Specimen on BOLD	BIOUG17383-C10	GMP#06029	BOLD:AAC6016	BIN on BOLD	BIOUG17383-C10	588	29-Jul-2014	Hymenoptera	Apidae	Bombus	Kate Perez	BIN Taxonomy Match	July
GMTPZ	GMGMJ	GMGMJ101-14	Specimen on BOLD	BIOUG17068-G08	GMP#06025	BOLD:AAC8068	BIN on BOLD	BIOUG17068-G08	582	02-Jun-2014	Hymenoptera	Andrenidae	Andrena	Kate Perez	BIN Taxonomy Match	June
GMTPZ	GMGMJ	GMGMJ295-14	Specimen on BOLD	BIOUG17070-G12	GMP#06025	BOLD:AAC9245	BIN on BOLD	BIOUG17070-G12	536	02-Jun-2014	Hymenoptera	Ichneumonidae	Dusona	Kate Perez	BIN Taxonomy Match	June
GMTPZ	GMGMJ	GMGMJ487-14	Specimen on BOLD	BIOUG17026-H11	GMP#06025	BOLD:AAC9245	BIN on BOLD	BIOUG17026-H11	575	02-Jun-2014	Hymenoptera	Ichneumonidae	Dusona	Kate Perez	BIN Taxonomy Match	June
GMTPZ	GMGMJ	GMGMJ883-14	Specimen on BOLD	BIOUG17093-B09	GMP#06025	BOLD:AAC9245	BIN on BOLD	BIOUG17093-B09	588	02-Jun-2014	Hymenoptera	Ichneumonidae	Dusona	Kate Perez	BIN Taxonomy Match	June
GMTPZ	GMGMK	GMGMK126-14	Specimen on BOLD	BIOUG17173-D11	GMP#06026	BOLD:AAC9550	BIN on BOLD	BIOUG17173-D11	576	17-Jun-2014	Hymenoptera	Tenthredinidae	Rhogogaster	Kate Perez	BIN Taxonomy Match	June
GMTPZ	GMGMK	GMGMK127-14	Specimen on BOLD	BIOUG17173-D12	GMP#06026	BOLD:AAC9550	BIN on BOLD	BIOUG17173-D12	582	17-Jun-2014	Hymenoptera	Tenthredinidae	Rhogogaster	Kate Perez	BIN Taxonomy Match	June
GMTPZ	GMGMA	GMGMA732-14	Specimen on BOLD	BIOUG16212-E12	GMP#06015	BOLD:AAD0331	BIN on BOLD	BIOUG16212-E12	577	25-Jul-2013	Hymenoptera	Halictidae	Sphecodes	Kate Perez	BIN Taxonomy Match	July
GMTPZ	GMGMN	GMGMN1445-14	Specimen on BOLD	BIOUG17466-C09	GMP#06029	BOLD:AAD1254	BIN on BOLD	BIOUG17466-C09	556	29-Jul-2014	Hymenoptera	Ichneumonidae	Acrotomus	Kate Perez	BOLD ID Engine Manual	July
GMTPZ	GMGMN	GMGMN1446-14	Specimen on BOLD	BIOUG17466-C10	GMP#06029	BOLD:AAD1254	BIN on BOLD	BIOUG17466-C10	534	29-Jul-2014	Hymenoptera	Ichneumonidae	Acrotomus	Kate Perez	BOLD ID Engine Manual	July
GMTPZ	GMGMN	GMGMN1588-14	Specimen on BOLD	BIOUG17467-G09	GMP#06029	BOLD:AAD1254	BIN on BOLD	BIOUG17467-G09	566	29-Jul-2014	Hymenoptera	Ichneumonidae	Acrotomus	Kate Perez	BOLD ID Engine Manual	July
GMTPZ	GMGMN	GMGMN1589-14	Specimen on BOLD	BIOUG17467-G10	GMP#06029	BOLD:AAD1254	BIN on BOLD	BIOUG17467-G10	576	29-Jul-2014	Hymenoptera	Ichneumonidae	Acrotomus	Kate Perez	BOLD ID Engine Manual	July
GMTPZ	GMGMA	GMGMA749-14	Specimen on BOLD	BIOUG16212-G05	GMP#06015	BOLD:AAD1879	BIN on BOLD	BIOUG16212-G05	567	25-Jul-2013	Hymenoptera	Ichneumonidae	Diplazon	Kate Perez	BOLD ID Engine Manual	July
GMTPZ	GMGMC	GMGMC1410-14	Specimen on BOLD	BIOUG16528-F03	GMP#06016	BOLD:AAD1879	BIN on BOLD	BIOUG16528-F03	579	08-Aug-2013	Hymenoptera	Ichneumonidae	Diplazon	Kate Perez	BOLD ID Engine Manual	August
GMTPZ	GMGMI	GMGMI1427-14	Specimen on BOLD	BIOUG17135-H08	GMP#06024	BOLD:AAD1879	BIN on BOLD	BIOUG17135-H08	555	16-May-2014	Hymenoptera	Ichneumonidae	Diplazon	Kate Perez	BOLD ID Engine Manual	May
GMTPZ	GMGML	GMGML1512-14	Specimen on BOLD	BIOUG17272-D06	GMP#06027	BOLD:AAD1879	BIN on BOLD	BIOUG17272-D06	600	01-Jul-2014	Hymenoptera	Ichneumonidae	Diplazon	Kate Perez	BOLD ID Engine Manual	July
GMTPZ	GMGML	GMGML410-14	Specimen on BOLD	BIOUG17231-G08	GMP#06027	BOLD:AAD2472	BIN on BOLD	BIOUG17231-G08	582	01-Jul-2014	Hymenoptera	Andrenidae	Andrena	Kate Perez	BIN Taxonomy Match	July
GMTPZ	GMGMM	GMGMM118-14	Specimen on BOLD	BIOUG17297-B09	GMP#06028	BOLD:AAD2530	BIN on BOLD	BIOUG17297-B09	579	15-Jul-2014	Hymenoptera	Apidae	Bombus	Kate Perez	BOLD ID Engine Manual	July
GMTPZ	GMGMM	GMGMM152-14	Specimen on BOLD	BIOUG17297-E07	GMP#06028	BOLD:AAD2530	BIN on BOLD	BIOUG17297-E07	579	15-Jul-2014	Hymenoptera	Apidae	Bombus	Kate Perez	BOLD ID Engine Manual	July
GMTPZ	GMGMN	GMGMN497-14	Specimen on BOLD	BIOUG17438-C11	GMP#06029	BOLD:AAD5195	BIN on BOLD	BIOUG17438-C11	579	29-Jul-2014	Hymenoptera	Ichneumonidae	0	Kate Perez	BOLD ID Engine Manual	July
GMTPZ	GMGMI	GMGMI013-14	Specimen on BOLD	BIOUG17084-A08	GMP#06024	BOLD:AAD5318	BIN on BOLD	BIOUG17084-A08	588	16-May-2014	Hymenoptera	Ichneumonidae	Ichneumon	Kate Perez	BOLD ID Engine Manual	May
GMTPZ	GMGML	GMGML185-14	Specimen on BOLD	BIOUG17229-H02	GMP#06027	BOLD:AAD5318	BIN on BOLD	BIOUG17229-H02	534	01-Jul-2014	Hymenoptera	Ichneumonidae	Ichneumon	Kate Perez	BOLD ID Engine Manual	July
GMTPZ	GMGMA	GMGMA414-14	Specimen on BOLD	BIOUG16209-C03	GMP#06015	BOLD:AAD5869	BIN on BOLD	BIOUG16209-C03	537	25-Jul-2013	Hymenoptera	Halictidae	Halictus	Kate Perez	BIN Taxonomy Match	July
GMTPZ	GMGMA	GMGMA550-14	Specimen on BOLD	BIOUG16210-F08	GMP#06015	BOLD:AAD5869	BIN on BOLD	BIOUG16210-F08	606	25-Jul-2013	Hymenoptera	Halictidae	Halictus	Kate Perez	BIN Taxonomy Match	July
GMTPZ	GMGMA	GMGMA669-14	Specimen on BOLD	BIOUG16211-H08	GMP#06015	BOLD:AAD5869	BIN on BOLD	BIOUG16211-H08	593	25-Jul-2013	Hymenoptera	Halictidae	Halictus	Kate Perez	BIN Taxonomy Match	July
GMTPZ	GMGMA	GMGMA722-14	Specimen on BOLD	BIOUG16212-E02	GMP#06015	BOLD:AAD5869	BIN on BOLD	BIOUG16212-E02	555	25-Jul-2013	Hymenoptera	Halictidae	Halictus	Kate Perez	BIN Taxonomy Match	July
GMTPZ	GMGMA	GMGMA730-14	Specimen on BOLD	BIOUG16212-E10	GMP#06015	BOLD:AAD5869	BIN on BOLD	BIOUG16212-E10	564	25-Jul-2013	Hymenoptera	Halictidae	Halictus	Kate Perez	BIN Taxonomy Match	July
GMTPZ	GMGMD	GMGMD1207-14	Specimen on BOLD	BIOUG16618-A06	GMP#06018	BOLD:AAD5869	BIN on BOLD	BIOUG16618-A06	555	16-Sep-2013	Hymenoptera	Halictidae	Halictus	Kate Perez	BIN Taxonomy Match	September
GMTPZ	GMGMD	GMGMD1213-14	Specimen on BOLD	BIOUG16618-A12	GMP#06018	BOLD:AAD5869	BIN on BOLD	BIOUG16618-A12	536	16-Sep-2013	Hymenoptera	Halictidae	Halictus	Kate Perez	BIN Taxonomy Match	September
GMTPZ	GMGMD	GMGMD265-14	Specimen on BOLD	BIOUG16608-B02	GMP#06018	BOLD:AAD5869	BIN on BOLD	BIOUG16608-B02	536	16-Sep-2013	Hymenoptera	Halictidae	Halictus	Kate Perez	BIN Taxonomy Match	September
GMTPZ	GMGMD	GMGMD281-14	Specimen on BOLD	BIOUG16608-C06	GMP#06018	BOLD:AAD5869	BIN on BOLD	BIOUG16608-C06	607	16-Sep-2013	Hymenoptera	Halictidae	Halictus	Kate Perez	BIN Taxonomy Match	September
GMTPZ	GMGMD	GMGMD343-14	Specimen on BOLD	BIOUG16608-H08	GMP#06018	BOLD:AAD5869	BIN on BOLD	BIOUG16608-H08	582	16-Sep-2013	Hymenoptera	Halictidae	Halictus	Kate Perez	BIN Taxonomy Match	September
GMTPZ	GMGMJ	GMGMJ899-14	Specimen on BOLD	BIOUG17093-D01	GMP#06025	BOLD:AAD5869	BIN on BOLD	BIOUG17093-D01	584	02-Jun-2014	Hymenoptera	Halictidae	Halictus	Kate Perez	BIN Taxonomy Match	June
GMTPZ	GMGML	GMGML1450-14	Specimen on BOLD	BIOUG17271-G03	GMP#06027	BOLD:AAD5869	BIN on BOLD	BIOUG17271-G03	555	01-Jul-2014	Hymenoptera	Halictidae	Halictus	Kate Perez	BIN Taxonomy Match	July
GMTPZ	GMGML	GMGML336-14	Specimen on BOLD	BIOUG17231-A06	GMP#06027	BOLD:AAD5869	BIN on BOLD	BIOUG17231-A06	564	01-Jul-2014	Hymenoptera	Halictidae	Halictus	Kate Perez	BIN Taxonomy Match	July
GMTPZ	GMGML	GMGML359-14	Specimen on BOLD	BIOUG17231-C05	GMP#06027	BOLD:AAD5869	BIN on BOLD	BIOUG17231-C05	585	01-Jul-2014	Hymenoptera	Halictidae	Halictus	Kate Perez	BIN Taxonomy Match	July
GMTPZ	GMGML	GMGML363-14	Specimen on BOLD	BIOUG17231-C09	GMP#06027	BOLD:AAD5869	BIN on BOLD	BIOUG17231-C09	564	01-Jul-2014	Hymenoptera	Halictidae	Halictus	Kate Perez	BIN Taxonomy Match	July
GMTPZ	GMGML	GMGML418-14	Specimen on BOLD	BIOUG17231-H04	GMP#06027	BOLD:AAD5869	BIN on BOLD	BIOUG17231-H04	576	01-Jul-2014	Hymenoptera	Halictidae	Halictus	Kate Perez	BIN Taxonomy Match	July
GMTPZ	GMGML	GMGML419-14	Specimen on BOLD	BIOUG17231-H05	GMP#06027	BOLD:AAD5869	BIN on BOLD	BIOUG17231-H05	576	01-Jul-2014	Hymenoptera	Halictidae	Halictus	Kate Perez	BIN Taxonomy Match	July
GMTPZ	GMGML	GMGML421-14	Specimen on BOLD	BIOUG17231-H07	GMP#06027	BOLD:AAD5869	BIN on BOLD	BIOUG17231-H07	588	01-Jul-2014	Hymenoptera	Halictidae	Halictus	Kate Perez	BIN Taxonomy Match	July
GMTPZ	GMGMM	GMGMM1046-14	Specimen on BOLD	BIOUG17374-G08	GMP#06028	BOLD:AAD5869	BIN on BOLD	BIOUG17374-G08	588	15-Jul-2014	Hymenoptera	Halictidae	Halictus	Kate Perez	BIN Taxonomy Match	July
GMTPZ	GMGMM	GMGMM1047-14	Specimen on BOLD	BIOUG17374-G09	GMP#06028	BOLD:AAD5869	BIN on BOLD	BIOUG17374-G09	576	15-Jul-2014	Hymenoptera	Halictidae	Halictus	Kate Perez	BIN Taxonomy Match	July
GMTPZ	GMGMM	GMGMM1064-14	Specimen on BOLD	BIOUG17375-A03	GMP#06028	BOLD:AAD5869	BIN on BOLD	BIOUG17375-A03	588	15-Jul-2014	Hymenoptera	Halictidae	Halictus	Kate Perez	BIN Taxonomy Match	July
GMTPZ	GMGMM	GMGMM1066-14	Specimen on BOLD	BIOUG17375-A05	GMP#06028	BOLD:AAD5869	BIN on BOLD	BIOUG17375-A05	582	15-Jul-2014	Hymenoptera	Halictidae	Halictus	Kate Perez	BIN Taxonomy Match	July
GMTPZ	GMGMM	GMGMM1073-14	Specimen on BOLD	BIOUG17375-A12	GMP#06028	BOLD:AAD5869	BIN on BOLD	BIOUG17375-A12	582	15-Jul-2014	Hymenoptera	Halictidae	Halictus	Kate Perez	BIN Taxonomy Match	July
GMTPZ	GMGMM	GMGMM1087-14	Specimen on BOLD	BIOUG17375-C02	GMP#06028	BOLD:AAD5869	BIN on BOLD	BIOUG17375-C02	564	15-Jul-2014	Hymenoptera	Halictidae	Halictus	Kate Perez	BIN Taxonomy Match	July
GMTPZ	GMGMM	GMGMM1096-14	Specimen on BOLD	BIOUG17375-C11	GMP#06028	BOLD:AAD5869	BIN on BOLD	BIOUG17375-C11	576	15-Jul-2014	Hymenoptera	Halictidae	Halictus	Kate Perez	BIN Taxonomy Match	July
GMTPZ	GMGMM	GMGMM1156-14	Specimen on BOLD	BIOUG17375-H11	GMP#06028	BOLD:AAD5869	BIN on BOLD	BIOUG17375-H11	551	15-Jul-2014	Hymenoptera	Halictidae	Halictus	Kate Perez	BIN Taxonomy Match	July
GMTPZ	GMGMM	GMGMM434-14	Specimen on BOLD	BIOUG17301-D02	GMP#06028	BOLD:AAD5869	BIN on BOLD	BIOUG17301-D02	582	15-Jul-2014	Hymenoptera	Halictidae	Halictus	Kate Perez	BIN Taxonomy Match	July
GMTPZ	GMGMM	GMGMM442-14	Specimen on BOLD	BIOUG17301-D10	GMP#06028	BOLD:AAD5869	BIN on BOLD	BIOUG17301-D10	582	15-Jul-2014	Hymenoptera	Halictidae	Halictus	Kate Perez	BIN Taxonomy Match	July
GMTPZ	GMGMM	GMGMM456-14	Specimen on BOLD	BIOUG17301-E12	GMP#06028	BOLD:AAD5869	BIN on BOLD	BIOUG17301-E12	582	15-Jul-2014	Hymenoptera	Halictidae	Halictus	Kate Perez	BIN Taxonomy Match	July
GMTPZ	GMGMM	GMGMM462-14	Specimen on BOLD	BIOUG17301-F06	GMP#06028	BOLD:AAD5869	BIN on BOLD	BIOUG17301-F06	564	15-Jul-2014	Hymenoptera	Halictidae	Halictus	Kate Perez	BIN Taxonomy Match	July
GMTPZ	GMGMM	GMGMM474-14	Specimen on BOLD	BIOUG17301-G06	GMP#06028	BOLD:AAD5869	BIN on BOLD	BIOUG17301-G06	564	15-Jul-2014	Hymenoptera	Halictidae	Halictus	Kate Perez	BIN Taxonomy Match	July
GMTPZ	GMGMM	GMGMM480-14	Specimen on BOLD	BIOUG17301-G12	GMP#06028	BOLD:AAD5869	BIN on BOLD	BIOUG17301-G12	576	15-Jul-2014	Hymenoptera	Halictidae	Halictus	Kate Perez	BIN Taxonomy Match	July
GMTPZ	GMGMM	GMGMM484-14	Specimen on BOLD	BIOUG17301-H04	GMP#06028	BOLD:AAD5869	BIN on BOLD	BIOUG17301-H04	576	15-Jul-2014	Hymenoptera	Halictidae	Halictus	Kate Perez	BIN Taxonomy Match	July
GMTPZ	GMGMM	GMGMM486-14	Specimen on BOLD	BIOUG17301-H06	GMP#06028	BOLD:AAD5869	BIN on BOLD	BIOUG17301-H06	576	15-Jul-2014	Hymenoptera	Halictidae	Halictus	Kate Perez	BIN Taxonomy Match	July
GMTPZ	GMGMM	GMGMM488-14	Specimen on BOLD	BIOUG17301-H08	GMP#06028	BOLD:AAD5869	BIN on BOLD	BIOUG17301-H08	588	15-Jul-2014	Hymenoptera	Halictidae	Halictus	Kate Perez	BIN Taxonomy Match	July
GMTPZ	GMGMN	GMGMN1361-14	Specimen on BOLD	BIOUG17447-D08	GMP#06029	BOLD:AAD5869	BIN on BOLD	BIOUG17447-D08	551	29-Jul-2014	Hymenoptera	Ichneumonidae	Acrotomus	Kate Perez	BOLD ID Engine Manual	July
GMTPZ	GMGMK	GMGMK360-14	Specimen on BOLD	BIOUG17175-H07	GMP#06026	BOLD:AAD6282	BIN on BOLD	BIOUG17175-H07	588	17-Jun-2014	Hymenoptera	Megachilidae	Osmia	Kate Perez	BIN Taxonomy Match	June
GMTPZ	GMGMA	GMGMA1505-14	Specimen on BOLD	BIOUG16220-G01	GMP#06015	BOLD:AAD7396	BIN on BOLD	BIOUG16220-G01	588	25-Jul-2013	Hymenoptera	Halictidae	Sphecodes	Kate Perez	BIN Taxonomy Match	July
GMTPZ	GMGMN	GMGMN519-14	Specimen on BOLD	BIOUG17438-E09	GMP#06029	BOLD:AAD7396	BIN on BOLD	BIOUG17438-E09	582	29-Jul-2014	Hymenoptera	Halictidae	Sphecodes	Kate Perez	BIN Taxonomy Match	July
GMTPZ	GMGMN	GMGMN632-14	Specimen on BOLD	BIOUG17439-G03	GMP#06029	BOLD:AAD7396	BIN on BOLD	BIOUG17439-G03	607	29-Jul-2014	Hymenoptera	Halictidae	Sphecodes	Kate Perez	BIN Taxonomy Match	July
GMTPZ	GMGMK	GMGMK352-14	Specimen on BOLD	BIOUG17175-G11	GMP#06026	BOLD:AAD7803	BIN on BOLD	BIOUG17175-G11	588	17-Jun-2014	Hymenoptera	Megachilidae	Megachile	Kate Perez	BIN Taxonomy Match	June
GMTPZ	GMGML	GMGML167-14	Specimen on BOLD	BIOUG17229-F08	GMP#06027	BOLD:AAD7803	BIN on BOLD	BIOUG17229-F08	525	01-Jul-2014	Hymenoptera	Megachilidae	Megachile	Kate Perez	BIN Taxonomy Match	July
GMTPE	GMGRE	GMGRE3490-13	Specimen on BOLD	BIOUG06448-B05	bayw.9	BOLD:AAD7966	BIN on BOLD	BIOUG06448-B05	629	04-Jul-2012	Hymenoptera	Braconidae	Choeras	Kate Perez	BIN Taxonomy Match	July
GMTPZ	GMGMD	GMGMD162-14	Specimen on BOLD	BIOUG16607-A06	GMP#06018	BOLD:AAD8184	BIN on BOLD	BIOUG16607-A06	588	16-Sep-2013	Hymenoptera	Apidae	Bombus	Kate Perez	BIN Taxonomy Match	September
GMTPZ	GMGMI	GMGMI064-14	Specimen on BOLD	BIOUG17084-E11	GMP#06024	BOLD:AAD8184	BIN on BOLD	BIOUG17084-E11	589	16-May-2014	Hymenoptera	Apidae	Bombus	Kate Perez	BIN Taxonomy Match	May
GMTPZ	GMGMM	GMGMM171-14	Specimen on BOLD	BIOUG17297-G02	GMP#06028	BOLD:AAD8184	BIN on BOLD	BIOUG17297-G02	549	15-Jul-2014	Hymenoptera	Apidae	Bombus	Kate Perez	BIN Taxonomy Match	July
GMTPZ	GMGMN	GMGMN029-14	Specimen on BOLD	BIOUG17299-G05	GMP#06029	BOLD:AAD8221	BIN on BOLD	BIOUG17299-G05	573	29-Jul-2014	Hymenoptera	Apidae	Bombus	Kate Perez	BIN Taxonomy Match	July
GMTPZ	GMGMN	GMGMN043-14	Specimen on BOLD	BIOUG17299-H07	GMP#06029	BOLD:AAD8221	BIN on BOLD	BIOUG17299-H07	527	29-Jul-2014	Hymenoptera	Apidae	Bombus	Kate Perez	BIN Taxonomy Match	July
GMTPZ	GMGMN	GMGMN297-14	Specimen on BOLD	BIOUG17383-E08	GMP#06029	BOLD:AAD8221	BIN on BOLD	BIOUG17383-E08	591	29-Jul-2014	Hymenoptera	Apidae	Bombus	Kate Perez	BIN Taxonomy Match	July
GMTPZ	GMGMI	GMGMI419-14	Specimen on BOLD	BIOUG17111-C10	GMP#06024	BOLD:AAD8992	BIN on BOLD	BIOUG17111-C10	576	16-May-2014	Hymenoptera	Tenthredinidae	Tenthredopsis	Kate Perez	BIN Taxonomy Match	May
GMTPZ	GMGMJ	GMGMJ132-14	Specimen on BOLD	BIOUG17069-B04	GMP#06025	BOLD:AAD8992	BIN on BOLD	BIOUG17069-B04	549	02-Jun-2014	Hymenoptera	Tenthredinidae	Tenthredopsis	Kate Perez	BIN Taxonomy Match	June
GMTPZ	GMGMK	GMGMK347-14	Specimen on BOLD	BIOUG17175-G06	GMP#06026	BOLD:AAD8992	BIN on BOLD	BIOUG17175-G06	546	17-Jun-2014	Hymenoptera	Tenthredinidae	Tenthredopsis	Kate Perez	BIN Taxonomy Match	June
GMTPE	GMGRC	GMGRC3051-13	Specimen on BOLD	BIOUG06436-A09	bayw.5	BOLD:AAD8992	BIN on BOLD	BIOUG06436-A09	592	08-Jun-2012	Hymenoptera	Tenthredinidae	Tenthredopsis	Kate Perez	BIN Taxonomy Match	June
GMTPE	GMGRD	GMGRD3632-13	Specimen on BOLD	BIOUG06436-D10	bayw.7	BOLD:AAD8992	BIN on BOLD	BIOUG06436-D10	579	20-Jun-2012	Hymenoptera	Tenthredinidae	Tenthredopsis	Kate Perez	BIN Taxonomy Match	June
GMTPZ	GMGMA	GMGMA1100-14	Specimen on BOLD	BIOUG16216-D12	GMP#06015	BOLD:AAD9335	BIN on BOLD	BIOUG16216-D12	612	25-Jul-2013	Hymenoptera	Halictidae	Lasioglossum	Kate Perez	BIN Taxonomy Match	July
GMTPZ	GMGMA	GMGMA1104-14	Specimen on BOLD	BIOUG16216-E04	GMP#06015	BOLD:AAD9335	BIN on BOLD	BIOUG16216-E04	539	25-Jul-2013	Hymenoptera	Halictidae	Lasioglossum	Kate Perez	BIN Taxonomy Match	July
GMTPZ	GMGMA	GMGMA1109-14	Specimen on BOLD	BIOUG16216-E09	GMP#06015	BOLD:AAD9335	BIN on BOLD	BIOUG16216-E09	564	25-Jul-2013	Hymenoptera	Halictidae	Lasioglossum	Kate Perez	BIN Taxonomy Match	July
GMTPZ	GMGMA	GMGMA1111-14	Specimen on BOLD	BIOUG16216-E11	GMP#06015	BOLD:AAD9335	BIN on BOLD	BIOUG16216-E11	537	25-Jul-2013	Hymenoptera	Halictidae	Lasioglossum	Kate Perez	BIN Taxonomy Match	July
GMTPZ	GMGMA	GMGMA1143-14	Specimen on BOLD	BIOUG16216-H07	GMP#06015	BOLD:AAD9335	BIN on BOLD	BIOUG16216-H07	554	25-Jul-2013	Hymenoptera	Halictidae	Lasioglossum	Kate Perez	BIN Taxonomy Match	July
GMTPZ	GMGMA	GMGMA752-14	Specimen on BOLD	BIOUG16212-G08	GMP#06015	BOLD:AAD9335	BIN on BOLD	BIOUG16212-G08	623	25-Jul-2013	Hymenoptera	Halictidae	Lasioglossum	Kate Perez	BIN Taxonomy Match	July
GMTPZ	GMGMB	GMGMB1212-14	Specimen on BOLD	BIOUG16280-D11	GMP#06017	BOLD:AAD9335	BIN on BOLD	BIOUG16280-D11	526	26-Aug-2013	Hymenoptera	Halictidae	Lasioglossum	Kate Perez	BIN Taxonomy Match	August
GMTPZ	GMGMB	GMGMB627-14	Specimen on BOLD	BIOUG16274-C08	GMP#06017	BOLD:AAD9335	BIN on BOLD	BIOUG16274-C08	548	26-Aug-2013	Hymenoptera	Halictidae	Lasioglossum	Kate Perez	BIN Taxonomy Match	August
GMTPZ	GMGMB	GMGMB633-14	Specimen on BOLD	BIOUG16274-D02	GMP#06017	BOLD:AAD9335	BIN on BOLD	BIOUG16274-D02	552	26-Aug-2013	Hymenoptera	Halictidae	Lasioglossum	Kate Perez	BIN Taxonomy Match	August
GMTPZ	GMGMC	GMGMC1008-14	Specimen on BOLD	BIOUG16524-D05	GMP#06016	BOLD:AAD9335	BIN on BOLD	BIOUG16524-D05	561	08-Aug-2013	Hymenoptera	Halictidae	Lasioglossum	Kate Perez	BIN Taxonomy Match	August
GMTPZ	GMGMC	GMGMC1061-14	Specimen on BOLD	BIOUG16524-H10	GMP#06016	BOLD:AAD9335	BIN on BOLD	BIOUG16524-H10	589	08-Aug-2013	Hymenoptera	Halictidae	Lasioglossum	Kate Perez	BIN Taxonomy Match	August
GMTPZ	GMGMC	GMGMC1391-14	Specimen on BOLD	BIOUG16528-D08	GMP#06016	BOLD:AAD9335	BIN on BOLD	BIOUG16528-D08	576	08-Aug-2013	Hymenoptera	Halictidae	Lasioglossum	Kate Perez	BIN Taxonomy Match	August
GMTPZ	GMGMC	GMGMC364-14	Specimen on BOLD	BIOUG16359-A02	GMP#06016	BOLD:AAD9335	BIN on BOLD	BIOUG16359-A02	516	08-Aug-2013	Hymenoptera	Halictidae	Lasioglossum	Kate Perez	BIN Taxonomy Match	August
GMTPZ	GMGMC	GMGMC366-14	Specimen on BOLD	BIOUG16359-A04	GMP#06016	BOLD:AAD9335	BIN on BOLD	BIOUG16359-A04	582	08-Aug-2013	Hymenoptera	Halictidae	Lasioglossum	Kate Perez	BIN Taxonomy Match	August
GMTPZ	GMGMC	GMGMC406-14	Specimen on BOLD	BIOUG16359-D08	GMP#06016	BOLD:AAD9335	BIN on BOLD	BIOUG16359-D08	617	08-Aug-2013	Hymenoptera	Halictidae	Lasioglossum	Kate Perez	BIN Taxonomy Match	August
GMTPZ	GMGMC	GMGMC453-14	Specimen on BOLD	BIOUG16359-H07	GMP#06016	BOLD:AAD9335	BIN on BOLD	BIOUG16359-H07	588	08-Aug-2013	Hymenoptera	Halictidae	Lasioglossum	Kate Perez	BIN Taxonomy Match	August
GMTPZ	GMGMC	GMGMC686-14	Specimen on BOLD	BIOUG16520-C12	GMP#06016	BOLD:AAD9335	BIN on BOLD	BIOUG16520-C12	573	08-Aug-2013	Hymenoptera	Halictidae	Lasioglossum	Kate Perez	BIN Taxonomy Match	August
GMTPZ	GMGMC	GMGMC706-14	Specimen on BOLD	BIOUG16520-E08	GMP#06016	BOLD:AAD9335	BIN on BOLD	BIOUG16520-E08	522	08-Aug-2013	Hymenoptera	Halictidae	Lasioglossum	Kate Perez	BIN Taxonomy Match	August
GMTPZ	GMGMC	GMGMC918-14	Specimen on BOLD	BIOUG16523-D10	GMP#06016	BOLD:AAD9335	BIN on BOLD	BIOUG16523-D10	508	08-Aug-2013	Hymenoptera	Halictidae	Lasioglossum	Kate Perez	BIN Taxonomy Match	August
GMTPZ	GMGMC	GMGMC938-14	Specimen on BOLD	BIOUG16523-F06	GMP#06016	BOLD:AAD9335	BIN on BOLD	BIOUG16523-F06	613	08-Aug-2013	Hymenoptera	Halictidae	Lasioglossum	Kate Perez	BIN Taxonomy Match	August
GMTPZ	GMGMC	GMGMC987-14	Specimen on BOLD	BIOUG16524-B08	GMP#06016	BOLD:AAD9335	BIN on BOLD	BIOUG16524-B08	573	08-Aug-2013	Hymenoptera	Halictidae	Lasioglossum	Kate Perez	BIN Taxonomy Match	August
GMTPZ	GMGMC	GMGMC992-14	Specimen on BOLD	BIOUG16524-C01	GMP#06016	BOLD:AAD9335	BIN on BOLD	BIOUG16524-C01	577	08-Aug-2013	Hymenoptera	Halictidae	Lasioglossum	Kate Perez	BIN Taxonomy Match	August
GMTPZ	GMGMD	GMGMD1545-14	Specimen on BOLD	BIOUG16646-H10	GMP#06018	BOLD:AAD9335	BIN on BOLD	BIOUG16646-H10	589	16-Sep-2013	Hymenoptera	Halictidae	Lasioglossum	Kate Perez	BIN Taxonomy Match	September
GMTPZ	GMGMJ	GMGMJ1258-14	Specimen on BOLD	BIOUG17097-B04	GMP#06025	BOLD:AAD9335	BIN on BOLD	BIOUG17097-B04	566	02-Jun-2014	Hymenoptera	Halictidae	Lasioglossum	Kate Perez	BIN Taxonomy Match	June
GMTPZ	GMGMK	GMGMK719-14	Specimen on BOLD	BIOUG17179-C04	GMP#06026	BOLD:AAD9335	BIN on BOLD	BIOUG17179-C04	503	17-Jun-2014	Hymenoptera	Halictidae	Lasioglossum	Kate Perez	BIN Taxonomy Match	June
GMTPZ	GMGMK	GMGMK722-14	Specimen on BOLD	BIOUG17179-C07	GMP#06026	BOLD:AAD9335	BIN on BOLD	BIOUG17179-C07	553	17-Jun-2014	Hymenoptera	Halictidae	Lasioglossum	Kate Perez	BIN Taxonomy Match	June
GMTPZ	GMGMK	GMGMK724-14	Specimen on BOLD	BIOUG17179-C09	GMP#06026	BOLD:AAD9335	BIN on BOLD	BIOUG17179-C09	517	17-Jun-2014	Hymenoptera	Halictidae	Lasioglossum	Kate Perez	BIN Taxonomy Match	June
GMTPZ	GMGMK	GMGMK742-14	Specimen on BOLD	BIOUG17179-E03	GMP#06026	BOLD:AAD9335	BIN on BOLD	BIOUG17179-E03	540	17-Jun-2014	Hymenoptera	Halictidae	Lasioglossum	Kate Perez	BIN Taxonomy Match	June
GMTPZ	GMGML	GMGML1535-14	Specimen on BOLD	BIOUG17272-F05	GMP#06027	BOLD:AAD9335	BIN on BOLD	BIOUG17272-F05	576	01-Jul-2014	Hymenoptera	Halictidae	Lasioglossum	Kate Perez	BIN Taxonomy Match	July
GMTPZ	GMGML	GMGML678-14	Specimen on BOLD	BIOUG17263-F03	GMP#06027	BOLD:AAD9335	BIN on BOLD	BIOUG17263-F03	618	01-Jul-2014	Hymenoptera	Halictidae	Lasioglossum	Kate Perez	BIN Taxonomy Match	July
GMTPZ	GMGML	GMGML994-14	Specimen on BOLD	BIOUG17267-H10	GMP#06027	BOLD:AAD9335	BIN on BOLD	BIOUG17267-H10	626	01-Jul-2014	Hymenoptera	Halictidae	Lasioglossum	Kate Perez	BIN Taxonomy Match	July
GMTPZ	GMGMM	GMGMM742-14	Specimen on BOLD	BIOUG17304-F01	GMP#06028	BOLD:AAD9335	BIN on BOLD	BIOUG17304-F01	546	15-Jul-2014	Hymenoptera	Halictidae	Lasioglossum	Kate Perez	BIN Taxonomy Match	July
GMTPZ	GMGMM	GMGMM776-14	Specimen on BOLD	BIOUG17304-H11	GMP#06028	BOLD:AAD9335	BIN on BOLD	BIOUG17304-H11	513	15-Jul-2014	Hymenoptera	Halictidae	Lasioglossum	Kate Perez	BIN Taxonomy Match	July
GMTPZ	GMGMM	GMGMM898-14	Specimen on BOLD	BIOUG17373-C03	GMP#06028	BOLD:AAD9335	BIN on BOLD	BIOUG17373-C03	625	15-Jul-2014	Hymenoptera	Halictidae	Lasioglossum	Kate Perez	BIN Taxonomy Match	July
GMTPZ	GMGMN	GMGMN467-14	Specimen on BOLD	BIOUG17438-A05	GMP#06029	BOLD:AAD9335	BIN on BOLD	BIOUG17438-A05	586	29-Jul-2014	Hymenoptera	Halictidae	Lasioglossum	Kate Perez	BIN Taxonomy Match	July
GMTPZ	GMGMN	GMGMN490-14	Specimen on BOLD	BIOUG17438-C04	GMP#06029	BOLD:AAD9335	BIN on BOLD	BIOUG17438-C04	539	29-Jul-2014	Hymenoptera	Halictidae	Lasioglossum	Kate Perez	BIN Taxonomy Match	July
GMTPZ	GMGMN	GMGMN530-14	Specimen on BOLD	BIOUG17438-F08	GMP#06029	BOLD:AAD9335	BIN on BOLD	BIOUG17438-F08	563	29-Jul-2014	Hymenoptera	Halictidae	Lasioglossum	Kate Perez	BIN Taxonomy Match	July
GMTPZ	GMGMN	GMGMN561-14	Specimen on BOLD	BIOUG17439-A04	GMP#06029	BOLD:AAD9335	BIN on BOLD	BIOUG17439-A04	627	29-Jul-2014	Hymenoptera	Halictidae	Lasioglossum	Kate Perez	BIN Taxonomy Match	July
GMTPZ	GMGMN	GMGMN570-14	Specimen on BOLD	BIOUG17439-B01	GMP#06029	BOLD:AAD9335	BIN on BOLD	BIOUG17439-B01	573	29-Jul-2014	Hymenoptera	Halictidae	Lasioglossum	Kate Perez	BIN Taxonomy Match	July
GMTPZ	GMGMN	GMGMN639-14	Specimen on BOLD	BIOUG17439-G10	GMP#06029	BOLD:AAD9335	BIN on BOLD	BIOUG17439-G10	552	29-Jul-2014	Hymenoptera	Halictidae	Lasioglossum	Kate Perez	BIN Taxonomy Match	July
GMTPZ	GMGMN	GMGMN867-14	Specimen on BOLD	BIOUG17442-C01	GMP#06029	BOLD:AAD9335	BIN on BOLD	BIOUG17442-C01	576	29-Jul-2014	Hymenoptera	Halictidae	Lasioglossum	Kate Perez	BIN Taxonomy Match	July
GMTPZ	GMGMN	GMGMN888-14	Specimen on BOLD	BIOUG17442-D10	GMP#06029	BOLD:AAD9335	BIN on BOLD	BIOUG17442-D10	576	29-Jul-2014	Hymenoptera	Halictidae	Lasioglossum	Kate Perez	BIN Taxonomy Match	July
GMTPZ	GMGMN	GMGMN905-14	Specimen on BOLD	BIOUG17442-F03	GMP#06029	BOLD:AAD9335	BIN on BOLD	BIOUG17442-F03	589	29-Jul-2014	Hymenoptera	Halictidae	Lasioglossum	Kate Perez	BIN Taxonomy Match	July
GMTPZ	GMGMN	GMGMN915-14	Specimen on BOLD	BIOUG17442-G01	GMP#06029	BOLD:AAD9335	BIN on BOLD	BIOUG17442-G01	505	29-Jul-2014	Hymenoptera	Halictidae	Lasioglossum	Kate Perez	BIN Taxonomy Match	July
GMTPZ	GMGMN	GMGMN927-14	Specimen on BOLD	BIOUG17442-H01	GMP#06029	BOLD:AAD9335	BIN on BOLD	BIOUG17442-H01	576	29-Jul-2014	Hymenoptera	Halictidae	Lasioglossum	Kate Perez	BIN Taxonomy Match	July
GMTPZ	GMGMN	GMGMN932-14	Specimen on BOLD	BIOUG17442-H06	GMP#06029	BOLD:AAD9335	BIN on BOLD	BIOUG17442-H06	550	29-Jul-2014	Hymenoptera	Halictidae	Lasioglossum	Kate Perez	BIN Taxonomy Match	July
GMTPZ	GMGMI	GMGMI445-14	Specimen on BOLD	BIOUG17111-E12	GMP#06024	BOLD:AAD9939	BIN on BOLD	BIOUG17111-E12	579	16-May-2014	Hymenoptera	Tenthredinidae	Dolerus	Kate Perez	BIN Taxonomy Match	May
GMTPZ	GMGMD	GMGMD304-14	Specimen on BOLD	BIOUG16608-E05	GMP#06018	BOLD:AAE1002	BIN on BOLD	BIOUG16608-E05	578	16-Sep-2013	Hymenoptera	Formicidae	Formica	Kate Perez	BIN Taxonomy Match	September
GMTPZ	GMGMC	GMGMC1034-14	Specimen on BOLD	BIOUG16524-F07	GMP#06016	BOLD:AAE1160	BIN on BOLD	BIOUG16524-F07	564	08-Aug-2013	Hymenoptera	Halictidae	Lasioglossum	Kate Perez	BIN Taxonomy Match	August
GMTPZ	GMGMC	GMGMC879-14	Specimen on BOLD	BIOUG16523-A07	GMP#06016	BOLD:AAE1160	BIN on BOLD	BIOUG16523-A07	588	08-Aug-2013	Hymenoptera	Halictidae	Lasioglossum	Kate Perez	BIN Taxonomy Match	August
GMTPZ	GMGMK	GMGMK693-14	Specimen on BOLD	BIOUG17179-A02	GMP#06026	BOLD:AAE1160	BIN on BOLD	BIOUG17179-A02	564	17-Jun-2014	Hymenoptera	Halictidae	Lasioglossum	Kate Perez	BIN Taxonomy Match	June
GMTPZ	GMGMK	GMGMK762-14	Specimen on BOLD	BIOUG17179-F11	GMP#06026	BOLD:AAE1160	BIN on BOLD	BIOUG17179-F11	558	17-Jun-2014	Hymenoptera	Halictidae	Lasioglossum	Kate Perez	BIN Taxonomy Match	June
GMTPZ	GMGMN	GMGMN543-14	Specimen on BOLD	BIOUG17438-G09	GMP#06029	BOLD:AAE1160	BIN on BOLD	BIOUG17438-G09	576	29-Jul-2014	Hymenoptera	Halictidae	Lasioglossum	Kate Perez	BIN Taxonomy Match	July
GMTPZ	GMGMA	GMGMA1044-14	Specimen on BOLD	BIOUG16215-H03	GMP#06015	BOLD:AAE1166	BIN on BOLD	BIOUG16215-H03	542	25-Jul-2013	Hymenoptera	Colletidae	Hylaeus	Kate Perez	BIN Taxonomy Match	July
GMTPZ	GMGMA	GMGMA750-14	Specimen on BOLD	BIOUG16212-G06	GMP#06015	BOLD:AAE1166	BIN on BOLD	BIOUG16212-G06	542	25-Jul-2013	Hymenoptera	Colletidae	Hylaeus	Kate Perez	BIN Taxonomy Match	July
GMTPZ	GMGMC	GMGMC430-14	Specimen on BOLD	BIOUG16359-F08	GMP#06016	BOLD:AAE1166	BIN on BOLD	BIOUG16359-F08	531	08-Aug-2013	Hymenoptera	Colletidae	Hylaeus	Kate Perez	BIN Taxonomy Match	August
GMTPZ	GMGMC	GMGMC887-14	Specimen on BOLD	BIOUG16523-B03	GMP#06016	BOLD:AAE1166	BIN on BOLD	BIOUG16523-B03	539	08-Aug-2013	Hymenoptera	Colletidae	Hylaeus	Kate Perez	BIN Taxonomy Match	August
GMTPZ	GMGMN	GMGMN589-14	Specimen on BOLD	BIOUG17439-C08	GMP#06029	BOLD:AAE1166	BIN on BOLD	BIOUG17439-C08	531	29-Jul-2014	Hymenoptera	Colletidae	Hylaeus	Kate Perez	BIN Taxonomy Match	July
GMTPZ	GMGMA	GMGMA679-14	Specimen on BOLD	BIOUG16212-A07	GMP#06015	BOLD:AAE1554	BIN on BOLD	BIOUG16212-A07	582	25-Jul-2013	Hymenoptera	Formicidae	Lasius	Kate Perez	BIN Taxonomy Match	July
GMTPZ	GMGMI	GMGMI1417-14	Specimen on BOLD	BIOUG17135-G10	GMP#06024	BOLD:AAE2634	BIN on BOLD	BIOUG17135-G10	658	16-May-2014	Hymenoptera	Ichneumonidae	0	Kate Perez	BOLD ID Engine Manual	May
GMTPZ	GMGMK	GMGMK1101-14	Specimen on BOLD	BIOUG17222-C06	GMP#06026	BOLD:AAE2634	BIN on BOLD	BIOUG17222-C06	591	17-Jun-2014	Hymenoptera	Ichneumonidae	0	Kate Perez	BOLD ID Engine Manual	June
GMTPZ	GMGML	GMGML1457-14	Specimen on BOLD	BIOUG17271-G10	GMP#06027	BOLD:AAE2634	BIN on BOLD	BIOUG17271-G10	573	01-Jul-2014	Hymenoptera	Ichneumonidae	0	Kate Perez	BOLD ID Engine Manual	July
GMTPZ	GMGML	GMGML420-14	Specimen on BOLD	BIOUG17231-H06	GMP#06027	BOLD:AAE2634	BIN on BOLD	BIOUG17231-H06	617	01-Jul-2014	Hymenoptera	Ichneumonidae	0	Kate Perez	BOLD ID Engine Manual	July
GMTPZ	GMGMM	GMGMM422-14	Specimen on BOLD	BIOUG17301-C02	GMP#06028	BOLD:AAE2634	BIN on BOLD	BIOUG17301-C02	614	15-Jul-2014	Hymenoptera	Ichneumonidae	0	Kate Perez	BOLD ID Engine Manual	July
GMTPZ	GMGMM	GMGMM891-14	Specimen on BOLD	BIOUG17373-B08	GMP#06028	BOLD:AAE2634	BIN on BOLD	BIOUG17373-B08	658	15-Jul-2014	Hymenoptera	Ichneumonidae	0	Kate Perez	BOLD ID Engine Manual	July
GMTPZ	GMGMC	GMGMC673-14	Specimen on BOLD	BIOUG16520-B11	GMP#06016	BOLD:AAE2747	BIN on BOLD	BIOUG16520-B11	576	08-Aug-2013	Hymenoptera	Tenthredinidae	Cladius	Kate Perez	BIN Taxonomy Match	August
GMTPZ	GMGMC	GMGMC688-14	Specimen on BOLD	BIOUG16520-D02	GMP#06016	BOLD:AAE2747	BIN on BOLD	BIOUG16520-D02	591	08-Aug-2013	Hymenoptera	Tenthredinidae	Cladius	Kate Perez	BIN Taxonomy Match	August
GMTPZ	GMGML	GMGML1216-14	Specimen on BOLD	BIOUG17266-C07	GMP#06027	BOLD:AAE2747	BIN on BOLD	BIOUG17266-C07	627	01-Jul-2014	Hymenoptera	Tenthredinidae	Cladius	Kate Perez	BIN Taxonomy Match	July
GMTPZ	GMGMA	GMGMA1041-14	Specimen on BOLD	BIOUG16215-G12	GMP#06015	BOLD:AAE2748	BIN on BOLD	BIOUG16215-G12	570	25-Jul-2013	Hymenoptera	Tenthredinidae	Cladius	Kate Perez	BIN Taxonomy Match	July
GMTPZ	GMGMA	GMGMA1083-14	Specimen on BOLD	BIOUG16216-C07	GMP#06015	BOLD:AAE2748	BIN on BOLD	BIOUG16216-C07	582	25-Jul-2013	Hymenoptera	Tenthredinidae	Cladius	Kate Perez	BIN Taxonomy Match	July
GMTPZ	GMGMA	GMGMA682-14	Specimen on BOLD	BIOUG16212-A10	GMP#06015	BOLD:AAE2748	BIN on BOLD	BIOUG16212-A10	585	25-Jul-2013	Hymenoptera	Tenthredinidae	Cladius	Kate Perez	BIN Taxonomy Match	July
GMTPZ	GMGMB	GMGMB1207-14	Specimen on BOLD	BIOUG16280-D06	GMP#06017	BOLD:AAE2748	BIN on BOLD	BIOUG16280-D06	610	26-Aug-2013	Hymenoptera	Tenthredinidae	Cladius	Kate Perez	BIN Taxonomy Match	August
GMTPZ	GMGMB	GMGMB1233-14	Specimen on BOLD	BIOUG16280-F08	GMP#06017	BOLD:AAE2748	BIN on BOLD	BIOUG16280-F08	602	26-Aug-2013	Hymenoptera	Tenthredinidae	Cladius	Kate Perez	BIN Taxonomy Match	August
GMTPZ	GMGMB	GMGMB658-14	Specimen on BOLD	BIOUG16274-F03	GMP#06017	BOLD:AAE2748	BIN on BOLD	BIOUG16274-F03	567	26-Aug-2013	Hymenoptera	Tenthredinidae	Cladius	Kate Perez	BIN Taxonomy Match	August
GMTPZ	GMGMJ	GMGMJ142-14	Specimen on BOLD	BIOUG17069-C02	GMP#06025	BOLD:AAE2757	BIN on BOLD	BIOUG17069-C02	576	02-Jun-2014	Hymenoptera	Ichneumonidae	Ichneumon	Kate Perez	BIN Taxonomy Match	June
GMTPZ	GMGMJ	GMGMJ143-14	Specimen on BOLD	BIOUG17069-C03	GMP#06025	BOLD:AAE2757	BIN on BOLD	BIOUG17069-C03	576	02-Jun-2014	Hymenoptera	Ichneumonidae	Ichneumon	Kate Perez	BIN Taxonomy Match	June
GMTPZ	GMGMJ	GMGMJ144-14	Specimen on BOLD	BIOUG17069-C04	GMP#06025	BOLD:AAE2757	BIN on BOLD	BIOUG17069-C04	576	02-Jun-2014	Hymenoptera	Ichneumonidae	Ichneumon	Kate Perez	BIN Taxonomy Match	June
GMTPE	GMGRD	GMGRD210-13	Specimen on BOLD	BIOUG05487-A08	bayw.7	BOLD:AAE3781	BIN on BOLD	BIOUG05487-A08	576	20-Jun-2012	Hymenoptera	Ichneumonidae	0	Kate Perez	BIN Taxonomy Match	June
GMTPZ	GMGMK	GMGMK250-14	Specimen on BOLD	BIOUG17174-G04	GMP#06026	BOLD:AAE4133	BIN on BOLD	BIOUG17174-G04	585	17-Jun-2014	Hymenoptera	Tenthredinidae	Tenthredo	Kate Perez	BIN Taxonomy Match	June
GMTPZ	GMGMD	GMGMD291-14	Specimen on BOLD	BIOUG16608-D04	GMP#06018	BOLD:AAE4947	BIN on BOLD	BIOUG16608-D04	537	16-Sep-2013	Hymenoptera	Andrenidae	Andrena	Kate Perez	BIN Taxonomy Match	September
GMTPZ	GMGMA	GMGMA1463-14	Specimen on BOLD	BIOUG16220-C07	GMP#06015	BOLD:AAE5078	BIN on BOLD	BIOUG16220-C07	591	25-Jul-2013	Hymenoptera	Colletidae	Hylaeus	Kate Perez	BIN Taxonomy Match	July
GMTPZ	GMGML	GMGML643-14	Specimen on BOLD	BIOUG17263-C04	GMP#06027	BOLD:AAE5078	BIN on BOLD	BIOUG17263-C04	538	01-Jul-2014	Hymenoptera	Colletidae	Hylaeus	Kate Perez	BIN Taxonomy Match	July
GMTPZ	GMGMA	GMGMA979-14	Specimen on BOLD	BIOUG16215-B10	GMP#06015	BOLD:AAE5603	BIN on BOLD	BIOUG16215-B10	588	25-Jul-2013	Hymenoptera	Tenthredinidae	Ametastegia	Kate Perez	BOLD ID Engine Manual	July
GMTPZ	GMGMB	GMGMB647-14	Specimen on BOLD	BIOUG16274-E04	GMP#06017	BOLD:AAE5603	BIN on BOLD	BIOUG16274-E04	582	26-Aug-2013	Hymenoptera	Tenthredinidae	Ametastegia	Kate Perez	BOLD ID Engine Manual	August
GMTPZ	GMGMB	GMGMB836-14	Specimen on BOLD	BIOUG16276-E03	GMP#06017	BOLD:AAE5603	BIN on BOLD	BIOUG16276-E03	576	26-Aug-2013	Hymenoptera	Tenthredinidae	Ametastegia	Kate Perez	BOLD ID Engine Manual	August
GMTPZ	GMGMC	GMGMC704-14	Specimen on BOLD	BIOUG16520-E06	GMP#06016	BOLD:AAE5603	BIN on BOLD	BIOUG16520-E06	594	08-Aug-2013	Hymenoptera	Tenthredinidae	Ametastegia	Kate Perez	BOLD ID Engine Manual	August
GMTPZ	GMGMD	GMGMD1173-14	Specimen on BOLD	BIOUG16617-F07	GMP#06018	BOLD:AAE5603	BIN on BOLD	BIOUG16617-F07	537	16-Sep-2013	Hymenoptera	Tenthredinidae	Ametastegia	Kate Perez	BOLD ID Engine Manual	September
GMTPZ	GMGMD	GMGMD507-14	Specimen on BOLD	BIOUG16610-F06	GMP#06018	BOLD:AAE5603	BIN on BOLD	BIOUG16610-F06	560	16-Sep-2013	Hymenoptera	Tenthredinidae	Ametastegia	Kate Perez	BOLD ID Engine Manual	September
GMTPZ	GMGMD	GMGMD610-14	Specimen on BOLD	BIOUG16611-G02	GMP#06018	BOLD:AAE5603	BIN on BOLD	BIOUG16611-G02	534	16-Sep-2013	Hymenoptera	Tenthredinidae	Ametastegia	Kate Perez	BOLD ID Engine Manual	September
GMTPZ	GMGMI	GMGMI632-14	Specimen on BOLD	BIOUG17113-E09	GMP#06024	BOLD:AAE5603	BIN on BOLD	BIOUG17113-E09	577	16-May-2014	Hymenoptera	Tenthredinidae	Ametastegia	Kate Perez	BOLD ID Engine Manual	May
GMTPZ	GMGMI	GMGMI864-14	Specimen on BOLD	BIOUG17116-A04	GMP#06024	BOLD:AAE5603	BIN on BOLD	BIOUG17116-A04	555	16-May-2014	Hymenoptera	Tenthredinidae	Ametastegia	Kate Perez	BOLD ID Engine Manual	May
GMTPZ	GMGMA	GMGMA1001-14	Specimen on BOLD	BIOUG16215-D08	GMP#06015	BOLD:AAE6121	BIN on BOLD	BIOUG16215-D08	586	25-Jul-2013	Hymenoptera	Tenthredinidae	Allantus	Kate Perez	BOLD ID Engine Manual	July
GMTPZ	GMGMA	GMGMA738-14	Specimen on BOLD	BIOUG16212-F06	GMP#06015	BOLD:AAE6121	BIN on BOLD	BIOUG16212-F06	591	25-Jul-2013	Hymenoptera	Tenthredinidae	Allantus	Kate Perez	BOLD ID Engine Manual	July
GMTPZ	GMGMA	GMGMA740-14	Specimen on BOLD	BIOUG16212-F08	GMP#06015	BOLD:AAE6121	BIN on BOLD	BIOUG16212-F08	579	25-Jul-2013	Hymenoptera	Tenthredinidae	Allantus	Kate Perez	BOLD ID Engine Manual	July
GMTPZ	GMGMB	GMGMB650-14	Specimen on BOLD	BIOUG16274-E07	GMP#06017	BOLD:AAE6121	BIN on BOLD	BIOUG16274-E07	576	26-Aug-2013	Hymenoptera	Tenthredinidae	Allantus	Kate Perez	BOLD ID Engine Manual	August
GMTPZ	GMGMC	GMGMC729-14	Specimen on BOLD	BIOUG16520-G07	GMP#06016	BOLD:AAE6121	BIN on BOLD	BIOUG16520-G07	588	08-Aug-2013	Hymenoptera	Tenthredinidae	Allantus	Kate Perez	BOLD ID Engine Manual	August
GMTPZ	GMGMD	GMGMD441-14	Specimen on BOLD	BIOUG16609-H11	GMP#06018	BOLD:AAE6121	BIN on BOLD	BIOUG16609-H11	598	16-Sep-2013	Hymenoptera	Tenthredinidae	Allantus	Kate Perez	BOLD ID Engine Manual	September
GMTPZ	GMGMI	GMGMI1422-14	Specimen on BOLD	BIOUG17135-H03	GMP#06024	BOLD:AAE6121	BIN on BOLD	BIOUG17135-H03	546	16-May-2014	Hymenoptera	Tenthredinidae	Allantus	Kate Perez	BOLD ID Engine Manual	May
GMTPZ	GMGMJ	GMGMJ648-14	Specimen on BOLD	BIOUG17072-F11	GMP#06025	BOLD:AAE6121	BIN on BOLD	BIOUG17072-F11	603	02-Jun-2014	Hymenoptera	Tenthredinidae	Allantus	Kate Perez	BOLD ID Engine Manual	June
GMTPZ	GMGMJ	GMGMJ662-14	Specimen on BOLD	BIOUG17072-H01	GMP#06025	BOLD:AAE6121	BIN on BOLD	BIOUG17072-H01	522	02-Jun-2014	Hymenoptera	Tenthredinidae	Allantus	Kate Perez	BOLD ID Engine Manual	June
GMTPZ	GMGMA	GMGMA441-14	Specimen on BOLD	BIOUG16209-E06	GMP#06015	BOLD:AAE6147	BIN on BOLD	BIOUG16209-E06	537	25-Jul-2013	Hymenoptera	Argidae	Arge	Kate Perez	BIN Taxonomy Match	July
GMTPE	GMGRA	GMGRA1446-13	Specimen on BOLD	BIOUG04800-E09	bayw.1	BOLD:AAE7186	BIN on BOLD	BIOUG04800-E09	614	04-May-2012	Hymenoptera	Braconidae	Praon	Kate Perez	BIN Taxonomy Match	May
GMTPZ	GMGML	GMGML1446-14	Specimen on BOLD	BIOUG17271-F11	GMP#06027	BOLD:AAE7448	BIN on BOLD	BIOUG17271-F11	658	01-Jul-2014	Hymenoptera	Ichneumonidae	0	Kate Perez	BOLD ID Engine Manual	July
GMTPZ	GMGMB	GMGMB857-14	Specimen on BOLD	BIOUG16276-F12	GMP#06017	BOLD:AAE7569	BIN on BOLD	BIOUG16276-F12	597	26-Aug-2013	Hymenoptera	Ichneumonidae	Diadegma	Kate Perez	BIN Taxonomy Match	August
GMTPZ	GMGMA	GMGMA597-14	Specimen on BOLD	BIOUG16211-B08	GMP#06015	BOLD:AAE8983	BIN on BOLD	BIOUG16211-B08	609	25-Jul-2013	Hymenoptera	Ichneumonidae	0	Kate Perez	BOLD ID Engine Manual	July
GMTPZ	GMGMC	GMGMC177-14	Specimen on BOLD	BIOUG16356-D06	GMP#06016	BOLD:AAE8983	BIN on BOLD	BIOUG16356-D06	588	08-Aug-2013	Hymenoptera	Ichneumonidae	0	Kate Perez	BOLD ID Engine Manual	August
GMTPZ	GMGMC	GMGMC194-14	Specimen on BOLD	BIOUG16356-E11	GMP#06016	BOLD:AAE8983	BIN on BOLD	BIOUG16356-E11	579	08-Aug-2013	Hymenoptera	Ichneumonidae	0	Kate Perez	BOLD ID Engine Manual	August
GMTPZ	GMGMC	GMGMC722-14	Specimen on BOLD	BIOUG16520-F12	GMP#06016	BOLD:AAE8983	BIN on BOLD	BIOUG16520-F12	588	08-Aug-2013	Hymenoptera	Ichneumonidae	0	Kate Perez	BOLD ID Engine Manual	August
GMTPZ	GMGMD	GMGMD173-14	Specimen on BOLD	BIOUG16607-B05	GMP#06018	BOLD:AAE8983	BIN on BOLD	BIOUG16607-B05	588	16-Sep-2013	Hymenoptera	Ichneumonidae	0	Kate Perez	BOLD ID Engine Manual	September
GMTPZ	GMGMD	GMGMD174-14	Specimen on BOLD	BIOUG16607-B06	GMP#06018	BOLD:AAE8983	BIN on BOLD	BIOUG16607-B06	543	16-Sep-2013	Hymenoptera	Ichneumonidae	0	Kate Perez	BOLD ID Engine Manual	September
GMTPZ	GMGMJ	GMGMJ1254-14	Specimen on BOLD	BIOUG17097-A12	GMP#06025	BOLD:AAE9753	BIN on BOLD	BIOUG17097-A12	630	02-Jun-2014	Hymenoptera	Cephidae	Cephus	Kate Perez	BIN Taxonomy Match	June
GMTPZ	GMGMJ	GMGMJ1498-14	Specimen on BOLD	BIOUG17099-F06	GMP#06025	BOLD:AAE9812	BIN on BOLD	BIOUG17099-F06	582	02-Jun-2014	Hymenoptera	Apidae	Ceratina	Kate Perez	BIN Taxonomy Match	June
GMTPZ	GMGML	GMGML916-14	Specimen on BOLD	BIOUG17267-B04	GMP#06027	BOLD:AAE9812	BIN on BOLD	BIOUG17267-B04	578	01-Jul-2014	Hymenoptera	Apidae	Ceratina	Kate Perez	BIN Taxonomy Match	July
GMTPZ	GMGMB	GMGMB1222-14	Specimen on BOLD	BIOUG16280-E09	GMP#06017	BOLD:AAF0483	BIN on BOLD	BIOUG16280-E09	579	26-Aug-2013	Hymenoptera	Ichneumonidae	Mesochorus	Kate Perez	BIN Taxonomy Match	August
GMTPZ	GMGMB	GMGMB793-14	Specimen on BOLD	BIOUG16276-A08	GMP#06017	BOLD:AAF0483	BIN on BOLD	BIOUG16276-A08	588	26-Aug-2013	Hymenoptera	Ichneumonidae	Mesochorus	Kate Perez	BIN Taxonomy Match	August
GMTPZ	GMGMB	GMGMB843-14	Specimen on BOLD	BIOUG16276-E10	GMP#06017	BOLD:AAF0483	BIN on BOLD	BIOUG16276-E10	579	26-Aug-2013	Hymenoptera	Ichneumonidae	Mesochorus	Kate Perez	BIN Taxonomy Match	August
GMTPZ	GMGMI	GMGMI1382-14	Specimen on BOLD	BIOUG17135-D11	GMP#06024	BOLD:AAF0483	BIN on BOLD	BIOUG17135-D11	528	16-May-2014	Hymenoptera	Ichneumonidae	Mesochorus	Kate Perez	BIN Taxonomy Match	May
GMTPZ	GMGMI	GMGMI599-14	Specimen on BOLD	BIOUG17113-B12	GMP#06024	BOLD:AAF0483	BIN on BOLD	BIOUG17113-B12	589	16-May-2014	Hymenoptera	Ichneumonidae	Mesochorus	Kate Perez	BIN Taxonomy Match	May
GMTPE	GMGRD	GMGRD2883-13	Specimen on BOLD	BIOUG05949-B03	bayw.7	BOLD:AAF0574	BIN on BOLD	BIOUG05949-B03	583	20-Jun-2012	Hymenoptera	Ichneumonidae	0	Kate Perez	BIN Taxonomy Match	June
GMTPZ	GMGMJ	GMGMJ388-14	Specimen on BOLD	BIOUG16899-H07	GMP#06025	BOLD:AAF1967	BIN on BOLD	BIOUG16899-H07	555	02-Jun-2014	Hymenoptera	Pamphiliidae	Pamphilius	Kate Perez	BIN Taxonomy Match	June
GMTPZ	GMGMJ	GMGMJ145-14	Specimen on BOLD	BIOUG17069-C05	GMP#06025	BOLD:AAF2941	BIN on BOLD	BIOUG17069-C05	576	02-Jun-2014	Hymenoptera	Ichneumonidae	Ichneumon	Kate Perez	BIN Taxonomy Match	June
GMTPZ	GMGMK	GMGMK1150-14	Specimen on BOLD	BIOUG17222-G07	GMP#06026	BOLD:AAF2941	BIN on BOLD	BIOUG17222-G07	564	17-Jun-2014	Hymenoptera	Ichneumonidae	Ichneumon	Kate Perez	BIN Taxonomy Match	June
GMTPZ	GMGMK	GMGMK243-14	Specimen on BOLD	BIOUG17174-F09	GMP#06026	BOLD:AAF2941	BIN on BOLD	BIOUG17174-F09	581	17-Jun-2014	Hymenoptera	Ichneumonidae	Ichneumon	Kate Perez	BIN Taxonomy Match	June
GMTPZ	GMGMK	GMGMK252-14	Specimen on BOLD	BIOUG17174-G06	GMP#06026	BOLD:AAF2941	BIN on BOLD	BIOUG17174-G06	575	17-Jun-2014	Hymenoptera	Ichneumonidae	Ichneumon	Kate Perez	BIN Taxonomy Match	June
GMTPZ	GMGMK	GMGMK254-14	Specimen on BOLD	BIOUG17174-G08	GMP#06026	BOLD:AAF2941	BIN on BOLD	BIOUG17174-G08	582	17-Jun-2014	Hymenoptera	Ichneumonidae	Ichneumon	Kate Perez	BIN Taxonomy Match	June
GMTPZ	GMGMK	GMGMK343-14	Specimen on BOLD	BIOUG17175-G02	GMP#06026	BOLD:AAF2941	BIN on BOLD	BIOUG17175-G02	588	17-Jun-2014	Hymenoptera	Ichneumonidae	Ichneumon	Kate Perez	BIN Taxonomy Match	June
GMTPZ	GMGMK	GMGMK348-14	Specimen on BOLD	BIOUG17175-G07	GMP#06026	BOLD:AAF2941	BIN on BOLD	BIOUG17175-G07	587	17-Jun-2014	Hymenoptera	Ichneumonidae	Ichneumon	Kate Perez	BIN Taxonomy Match	June
GMTPZ	GMGML	GMGML187-14	Specimen on BOLD	BIOUG17229-H04	GMP#06027	BOLD:AAF2941	BIN on BOLD	BIOUG17229-H04	567	01-Jul-2014	Hymenoptera	Ichneumonidae	Ichneumon	Kate Perez	BIN Taxonomy Match	July
GMTPZ	GMGMA	GMGMA1019-14	Specimen on BOLD	BIOUG16215-F02	GMP#06015	BOLD:AAF4022	BIN on BOLD	BIOUG16215-F02	588	25-Jul-2013	Hymenoptera	Colletidae	Hylaeus	Kate Perez	BIN Taxonomy Match	July
GMTPZ	GMGMN	GMGMN293-14	Specimen on BOLD	BIOUG17383-E04	GMP#06029	BOLD:AAF4164	BIN on BOLD	BIOUG17383-E04	599	29-Jul-2014	Hymenoptera	Vespidae	Ancistrocerus	Kate Perez	BIN Taxonomy Match	July
GMTPZ	GMGMI	GMGMI048-14	Specimen on BOLD	BIOUG17084-D07	GMP#06024	BOLD:AAF5611	BIN on BOLD	BIOUG17084-D07	576	16-May-2014	Hymenoptera	Tenthredinidae	Macrophya	Kate Perez	BIN Taxonomy Match	May
GMTPZ	GMGMI	GMGMI063-14	Specimen on BOLD	BIOUG17084-E10	GMP#06024	BOLD:AAF5611	BIN on BOLD	BIOUG17084-E10	537	16-May-2014	Hymenoptera	Tenthredinidae	Macrophya	Kate Perez	BIN Taxonomy Match	May
GMTPZ	GMGMI	GMGMI413-14	Specimen on BOLD	BIOUG17111-C04	GMP#06024	BOLD:AAF5611	BIN on BOLD	BIOUG17111-C04	591	16-May-2014	Hymenoptera	Tenthredinidae	Macrophya	Kate Perez	BIN Taxonomy Match	May
GMTPZ	GMGMJ	GMGMJ113-14	Specimen on BOLD	BIOUG17068-H08	GMP#06025	BOLD:AAF5611	BIN on BOLD	BIOUG17068-H08	591	02-Jun-2014	Hymenoptera	Tenthredinidae	Macrophya	Kate Perez	BIN Taxonomy Match	June
GMTPZ	GMGMJ	GMGMJ125-14	Specimen on BOLD	BIOUG17069-A09	GMP#06025	BOLD:AAF5611	BIN on BOLD	BIOUG17069-A09	552	02-Jun-2014	Hymenoptera	Tenthredinidae	Macrophya	Kate Perez	BIN Taxonomy Match	June
GMTPZ	GMGMJ	GMGMJ138-14	Specimen on BOLD	BIOUG17069-B10	GMP#06025	BOLD:AAF5611	BIN on BOLD	BIOUG17069-B10	576	02-Jun-2014	Hymenoptera	Tenthredinidae	Macrophya	Kate Perez	BIN Taxonomy Match	June
GMTPZ	GMGMJ	GMGMJ324-14	Specimen on BOLD	BIOUG17071-B06	GMP#06025	BOLD:AAF5611	BIN on BOLD	BIOUG17071-B06	588	02-Jun-2014	Hymenoptera	Tenthredinidae	Macrophya	Kate Perez	BIN Taxonomy Match	June
GMTPZ	GMGMK	GMGMK130-14	Specimen on BOLD	BIOUG17173-E03	GMP#06026	BOLD:AAF5611	BIN on BOLD	BIOUG17173-E03	591	17-Jun-2014	Hymenoptera	Tenthredinidae	Macrophya	Kate Perez	BIN Taxonomy Match	June
GMTPZ	GMGMK	GMGMK131-14	Specimen on BOLD	BIOUG17173-E04	GMP#06026	BOLD:AAF5611	BIN on BOLD	BIOUG17173-E04	588	17-Jun-2014	Hymenoptera	Tenthredinidae	Macrophya	Kate Perez	BIN Taxonomy Match	June
GMTPZ	GMGMK	GMGMK132-14	Specimen on BOLD	BIOUG17173-E05	GMP#06026	BOLD:AAF5611	BIN on BOLD	BIOUG17173-E05	564	17-Jun-2014	Hymenoptera	Tenthredinidae	Macrophya	Kate Perez	BIN Taxonomy Match	June
GMTPZ	GMGMK	GMGMK244-14	Specimen on BOLD	BIOUG17174-F10	GMP#06026	BOLD:AAF5611	BIN on BOLD	BIOUG17174-F10	576	17-Jun-2014	Hymenoptera	Tenthredinidae	Macrophya	Kate Perez	BIN Taxonomy Match	June
GMTPZ	GMGMK	GMGMK249-14	Specimen on BOLD	BIOUG17174-G03	GMP#06026	BOLD:AAF5611	BIN on BOLD	BIOUG17174-G03	579	17-Jun-2014	Hymenoptera	Tenthredinidae	Macrophya	Kate Perez	BIN Taxonomy Match	June
GMTPZ	GMGMK	GMGMK262-14	Specimen on BOLD	BIOUG17174-H04	GMP#06026	BOLD:AAF5611	BIN on BOLD	BIOUG17174-H04	564	17-Jun-2014	Hymenoptera	Tenthredinidae	Macrophya	Kate Perez	BIN Taxonomy Match	June
GMTPZ	GMGMN	GMGMN1600-14	Specimen on BOLD	BIOUG17467-H09	GMP#06029	BOLD:AAF7101	BIN on BOLD	BIOUG17467-H09	582	29-Jul-2014	Hymenoptera	Ichneumonidae	Acrotomus	Kate Perez	BOLD ID Engine Manual	July
GMTPZ	GMGMA	GMGMA1138-14	Specimen on BOLD	BIOUG16216-H02	GMP#06015	BOLD:AAF9914	BIN on BOLD	BIOUG16216-H02	635	25-Jul-2013	Hymenoptera	Braconidae	Annulipes	Kate Perez	BOLD ID Engine Manual	July
GMTPZ	GMGMK	GMGMK709-14	Specimen on BOLD	BIOUG17179-B06	GMP#06026	BOLD:AAG0698	BIN on BOLD	BIOUG17179-B06	564	17-Jun-2014	Hymenoptera	Braconidae	Adelius	Kate Perez	BIN Taxonomy Match	June
GMTPE	GMGRD	GMGRD1691-13	Specimen on BOLD	BIOUG05948-A07	bayw.7	BOLD:AAG0698	BIN on BOLD	BIOUG05948-A07	658	20-Jun-2012	Hymenoptera	Braconidae	Adelius	Kate Perez	BIN Taxonomy Match	June
GMTPE	GMGRD	GMGRD2923-13	Specimen on BOLD	BIOUG05949-E07	bayw.7	BOLD:AAG0698	BIN on BOLD	BIOUG05949-E07	603	20-Jun-2012	Hymenoptera	Braconidae	Adelius	Kate Perez	BIN Taxonomy Match	June
GMTPE	GMGRD	GMGRD3363-13	Specimen on BOLD	BIOUG06064-B08	bayw.7	BOLD:AAG0698	BIN on BOLD	BIOUG06064-B08	597	20-Jun-2012	Hymenoptera	Braconidae	Adelius	Kate Perez	BIN Taxonomy Match	June
GMTPE	GMGRE	GMGRE3348-13	Specimen on BOLD	BIOUG06279-H01	bayw.9	BOLD:AAG0698	BIN on BOLD	BIOUG06279-H01	562	04-Jul-2012	Hymenoptera	Braconidae	Adelius	Kate Perez	BIN Taxonomy Match	July
GMTPE	GMGRF	GMGRF1935-13	Specimen on BOLD	BIOUG07562-C11	bayw.11	BOLD:AAG0698	BIN on BOLD	BIOUG07562-C11	570	25-Jul-2012	Hymenoptera	Braconidae	Adelius	Kate Perez	BIN Taxonomy Match	July
GMTPE	GMGRC	GMGRC926-13	Specimen on BOLD	BIOUG05394-E05	bayw.5	BOLD:AAG0956	BIN on BOLD	BIOUG05394-E05	543	08-Jun-2012	Hymenoptera	Ichneumonidae	0	Kate Perez	BIN Taxonomy Match	June
GMTPE	GMGRD	GMGRD241-13	Specimen on BOLD	BIOUG05487-D03	bayw.7	BOLD:AAG0956	BIN on BOLD	BIOUG05487-D03	658	20-Jun-2012	Hymenoptera	Ichneumonidae	0	Kate Perez	BIN Taxonomy Match	June
GMTPE	GMGRE	GMGRE3521-13	Specimen on BOLD	BIOUG06448-D12	bayw.9	BOLD:AAG0956	BIN on BOLD	BIOUG06448-D12	591	04-Jul-2012	Hymenoptera	Ichneumonidae	0	Kate Perez	BIN Taxonomy Match	July
GMTPZ	GMGMA	GMGMA1448-14	Specimen on BOLD	BIOUG16220-B04	GMP#06015	BOLD:AAG6192	BIN on BOLD	BIOUG16220-B04	582	25-Jul-2013	Hymenoptera	Ichneumonidae	Sussaba	Kate Perez	BOLD ID Engine Manual	July
GMTPE	GMGRF	GMGRF3358-13	Specimen on BOLD	BIOUG06777-G01	bayw.11	BOLD:AAG6199	BIN on BOLD	BIOUG06777-G01	658	25-Jul-2012	Hymenoptera	Braconidae	0	Kate Perez	BIN Taxonomy Match	July
GMTPE	GMGRF	GMGRF4476-13	Specimen on BOLD	BIOUG07802-F12	bayw.11	BOLD:AAG6199	BIN on BOLD	BIOUG07802-F12	658	25-Jul-2012	Hymenoptera	Braconidae	0	Kate Perez	BIN Taxonomy Match	July
GMTPE	GMGRG	GMGRG4184-13	Specimen on BOLD	BIOUG08175-D03	bayw.13	BOLD:AAG6199	BIN on BOLD	BIOUG08175-D03	647	12-Aug-2012	Hymenoptera	Braconidae	0	Kate Perez	BIN Taxonomy Match	August
GMTPZ	GMGMN	GMGMN630-14	Specimen on BOLD	BIOUG17439-G01	GMP#06029	BOLD:AAG6689	BIN on BOLD	BIOUG17439-G01	637	29-Jul-2014	Hymenoptera	Braconidae	Bracon	Kate Perez	BIN Taxonomy Match	July
GMTPZ	GMGML	GMGML655-14	Specimen on BOLD	BIOUG17263-D04	GMP#06027	BOLD:AAG6690	BIN on BOLD	BIOUG17263-D04	658	01-Jul-2014	Hymenoptera	Braconidae	Clinocentrus	Kate Perez	BOLD ID Engine Manual	July
GMTPZ	GMGMD	GMGMD519-14	Specimen on BOLD	BIOUG16610-G06	GMP#06018	BOLD:AAG6715	BIN on BOLD	BIOUG16610-G06	658	16-Sep-2013	Hymenoptera	Braconidae	0	Kate Perez	BOLD ID Engine Manual	September
GMTPZ	GMGMM	GMGMM423-14	Specimen on BOLD	BIOUG17301-C03	GMP#06028	BOLD:AAG6715	BIN on BOLD	BIOUG17301-C03	624	15-Jul-2014	Hymenoptera	Braconidae	0	Kate Perez	BOLD ID Engine Manual	July
GMTPZ	GMGMM	GMGMM764-14	Specimen on BOLD	BIOUG17304-G11	GMP#06028	BOLD:AAG6715	BIN on BOLD	BIOUG17304-G11	594	15-Jul-2014	Hymenoptera	Braconidae	0	Kate Perez	BOLD ID Engine Manual	July
GMTPZ	GMGMA	GMGMA1052-14	Specimen on BOLD	BIOUG16215-H11	GMP#06015	BOLD:AAG6718	BIN on BOLD	BIOUG16215-H11	658	25-Jul-2013	Hymenoptera	Braconidae	0	Kate Perez	BOLD ID Engine Manual	July
GMTPZ	GMGML	GMGML671-14	Specimen on BOLD	BIOUG17263-E08	GMP#06027	BOLD:AAG7638	BIN on BOLD	BIOUG17263-E08	658	01-Jul-2014	Hymenoptera	Ichneumonidae	0	Kate Perez	BOLD ID Engine Manual	July
GMTPZ	GMGMD	GMGMD203-14	Specimen on BOLD	BIOUG16607-D11	GMP#06018	BOLD:AAG7726	BIN on BOLD	BIOUG16607-D11	582	16-Sep-2013	Hymenoptera	Ichneumonidae	0	Kate Perez	BOLD ID Engine Manual	September
GMTPZ	GMGMI	GMGMI473-14	Specimen on BOLD	BIOUG17111-H04	GMP#06024	BOLD:AAG7726	BIN on BOLD	BIOUG17111-H04	617	16-May-2014	Hymenoptera	Ichneumonidae	0	Kate Perez	BOLD ID Engine Manual	May
GMTPZ	GMGMN	GMGMN1362-14	Specimen on BOLD	BIOUG17447-D09	GMP#06029	BOLD:AAG7726	BIN on BOLD	BIOUG17447-D09	614	29-Jul-2014	Hymenoptera	Ichneumonidae	Acrotomus	Kate Perez	BOLD ID Engine Manual	July
GMTPZ	GMGMK	GMGMK726-14	Specimen on BOLD	BIOUG17179-C11	GMP#06026	BOLD:AAG7737	BIN on BOLD	BIOUG17179-C11	606	17-Jun-2014	Hymenoptera	Ichneumonidae	Ischnus	Kate Perez	BIN Taxonomy Match	June
GMTPZ	GMGMA	GMGMA1009-14	Specimen on BOLD	BIOUG16215-E04	GMP#06015	BOLD:AAG7873	BIN on BOLD	BIOUG16215-E04	574	25-Jul-2013	Hymenoptera	Crabronidae	Pemphredon	Kate Perez	BIN Taxonomy Match	July
GMTPZ	GMGMA	GMGMA1048-14	Specimen on BOLD	BIOUG16215-H07	GMP#06015	BOLD:AAG7873	BIN on BOLD	BIOUG16215-H07	571	25-Jul-2013	Hymenoptera	Crabronidae	Pemphredon	Kate Perez	BIN Taxonomy Match	July
GMTPZ	GMGMB	GMGMB655-14	Specimen on BOLD	BIOUG16274-E12	GMP#06017	BOLD:AAG7873	BIN on BOLD	BIOUG16274-E12	578	26-Aug-2013	Hymenoptera	Crabronidae	Pemphredon	Kate Perez	BIN Taxonomy Match	August
GMTPZ	GMGMK	GMGMK1107-14	Specimen on BOLD	BIOUG17222-C12	GMP#06026	BOLD:AAG7873	BIN on BOLD	BIOUG17222-C12	584	17-Jun-2014	Hymenoptera	Crabronidae	Pemphredon	Kate Perez	BIN Taxonomy Match	June
GMTPZ	GMGMK	GMGMK437-14	Specimen on BOLD	BIOUG17176-C07	GMP#06026	BOLD:AAG7873	BIN on BOLD	BIOUG17176-C07	588	17-Jun-2014	Hymenoptera	Crabronidae	Pemphredon	Kate Perez	BIN Taxonomy Match	June
GMTPZ	GMGMK	GMGMK442-14	Specimen on BOLD	BIOUG17176-C12	GMP#06026	BOLD:AAG7873	BIN on BOLD	BIOUG17176-C12	564	17-Jun-2014	Hymenoptera	Crabronidae	Pemphredon	Kate Perez	BIN Taxonomy Match	June
GMTPE	GMGRG	GMGRG4254-13	Specimen on BOLD	BIOUG08176-B02	bayw.13	BOLD:AAG7883	BIN on BOLD	BIOUG08176-B02	555	12-Aug-2012	Hymenoptera	Platygastridae	Leptasis	Kate Perez	BIN Taxonomy Match	August
GMTPE	GMGRG	GMGRG4271-13	Specimen on BOLD	BIOUG08176-C07	bayw.13	BOLD:AAG7883	BIN on BOLD	BIOUG08176-C07	570	12-Aug-2012	Hymenoptera	Platygastridae	Leptasis	Kate Perez	BIN Taxonomy Match	August
GMTPE	GMGRG	GMGRG4272-13	Specimen on BOLD	BIOUG08176-C08	bayw.13	BOLD:AAG7883	BIN on BOLD	BIOUG08176-C08	576	12-Aug-2012	Hymenoptera	Platygastridae	Leptasis	Kate Perez	BIN Taxonomy Match	August
GMTPZ	GMGMD	GMGMD475-14	Specimen on BOLD	BIOUG16610-C10	GMP#06018	BOLD:AAG7984	BIN on BOLD	BIOUG16610-C10	549	16-Sep-2013	Hymenoptera	Eulophidae	0	Kate Perez	BOLD ID Engine Manual	September
GMTPZ	GMGMD	GMGMD512-14	Specimen on BOLD	BIOUG16610-F11	GMP#06018	BOLD:AAG7984	BIN on BOLD	BIOUG16610-F11	573	16-Sep-2013	Hymenoptera	Eulophidae	0	Kate Perez	BOLD ID Engine Manual	September
GMTPE	GMGRG	GMGRG4447-13	Specimen on BOLD	BIOUG08178-B05	bayw.13	BOLD:AAG7990	BIN on BOLD	BIOUG08178-B05	570	12-Aug-2012	Hymenoptera	Platygastridae	0	Kate Perez	BIN Taxonomy Match	August
GMTPZ	GMGMK	GMGMK710-14	Specimen on BOLD	BIOUG17179-B07	GMP#06026	BOLD:AAG8013	BIN on BOLD	BIOUG17179-B07	537	17-Jun-2014	Hymenoptera	Braconidae	Aphidius	Kate Perez	BIN Taxonomy Match	June
GMTPZ	GMGMD	GMGMD280-14	Specimen on BOLD	BIOUG16608-C05	GMP#06018	BOLD:AAG8330	BIN on BOLD	BIOUG16608-C05	594	16-Sep-2013	Hymenoptera	Crabronidae	Psenulus	Kate Perez	BOLD ID Engine Manual	September
GMTPE	GMGRG	GMGRG4323-13	Specimen on BOLD	BIOUG08176-G11	bayw.13	BOLD:AAG8350	BIN on BOLD	BIOUG08176-G11	588	12-Aug-2012	Hymenoptera	Braconidae	0	Kate Perez	BIN Taxonomy Match	August
GMTPE	GMGRG	GMGRG4415-13	Specimen on BOLD	BIOUG08177-G08	bayw.13	BOLD:AAG8350	BIN on BOLD	BIOUG08177-G08	592	12-Aug-2012	Hymenoptera	Braconidae	0	Kate Perez	BIN Taxonomy Match	August
GMTPZ	GMGMJ	GMGMJ1262-14	Specimen on BOLD	BIOUG17097-B08	GMP#06025	BOLD:AAG8409	BIN on BOLD	BIOUG17097-B08	582	02-Jun-2014	Hymenoptera	Ichneumonidae	0	Kate Perez	BIN Taxonomy Match	June
GMTPZ	GMGMK	GMGMK741-14	Specimen on BOLD	BIOUG17179-E02	GMP#06026	BOLD:AAG8409	BIN on BOLD	BIOUG17179-E02	540	17-Jun-2014	Hymenoptera	Ichneumonidae	0	Kate Perez	BIN Taxonomy Match	June
GMTPZ	GMGML	GMGML1547-14	Specimen on BOLD	BIOUG17272-G05	GMP#06027	BOLD:AAG8409	BIN on BOLD	BIOUG17272-G05	591	01-Jul-2014	Hymenoptera	Ichneumonidae	0	Kate Perez	BIN Taxonomy Match	July
GMTPZ	GMGML	GMGML679-14	Specimen on BOLD	BIOUG17263-F04	GMP#06027	BOLD:AAG8409	BIN on BOLD	BIOUG17263-F04	591	01-Jul-2014	Hymenoptera	Ichneumonidae	0	Kate Perez	BIN Taxonomy Match	July
GMTPZ	GMGML	GMGML705-14	Specimen on BOLD	BIOUG17263-H06	GMP#06027	BOLD:AAG8409	BIN on BOLD	BIOUG17263-H06	588	01-Jul-2014	Hymenoptera	Ichneumonidae	0	Kate Perez	BIN Taxonomy Match	July
GMTPZ	GMGMM	GMGMM1070-14	Specimen on BOLD	BIOUG17375-A09	GMP#06028	BOLD:AAG8409	BIN on BOLD	BIOUG17375-A09	588	15-Jul-2014	Hymenoptera	Ichneumonidae	0	Kate Perez	BIN Taxonomy Match	July
GMTPZ	GMGMM	GMGMM716-14	Specimen on BOLD	BIOUG17304-C11	GMP#06028	BOLD:AAG8409	BIN on BOLD	BIOUG17304-C11	558	15-Jul-2014	Hymenoptera	Ichneumonidae	0	Kate Perez	BIN Taxonomy Match	July
GMTPZ	GMGMM	GMGMM723-14	Specimen on BOLD	BIOUG17304-D06	GMP#06028	BOLD:AAG8409	BIN on BOLD	BIOUG17304-D06	588	15-Jul-2014	Hymenoptera	Ichneumonidae	0	Kate Perez	BIN Taxonomy Match	July
GMTPZ	GMGMN	GMGMN559-14	Specimen on BOLD	BIOUG17439-A02	GMP#06029	BOLD:AAG8409	BIN on BOLD	BIOUG17439-A02	591	29-Jul-2014	Hymenoptera	Ichneumonidae	0	Kate Perez	BIN Taxonomy Match	July
GMTPE	GMGRF	GMGRF4507-13	Specimen on BOLD	BIOUG07803-A08	bayw.11	BOLD:AAG9511	BIN on BOLD	BIOUG07803-A08	579	25-Jul-2012	Hymenoptera	Ichneumonidae	Mesochorus	Kate Perez	BIN Taxonomy Match	July
GMTPZ	GMGMI	GMGMI1411-14	Specimen on BOLD	BIOUG17135-G04	GMP#06024	BOLD:AAG9608	BIN on BOLD	BIOUG17135-G04	567	16-May-2014	Hymenoptera	Ichneumonidae	Mesoleptidea	Kate Perez	BIN Taxonomy Match	May
GMTPZ	GMGMJ	GMGMJ485-14	Specimen on BOLD	BIOUG17026-H09	GMP#06025	BOLD:AAG9608	BIN on BOLD	BIOUG17026-H09	588	02-Jun-2014	Hymenoptera	Ichneumonidae	Mesoleptidea	Kate Perez	BIN Taxonomy Match	June
GMTPZ	GMGMJ	GMGMJ598-14	Specimen on BOLD	BIOUG17072-B09	GMP#06025	BOLD:AAG9608	BIN on BOLD	BIOUG17072-B09	534	02-Jun-2014	Hymenoptera	Ichneumonidae	Mesoleptidea	Kate Perez	BIN Taxonomy Match	June
GMTPZ	GMGMK	GMGMK1104-14	Specimen on BOLD	BIOUG17222-C09	GMP#06026	BOLD:AAG9608	BIN on BOLD	BIOUG17222-C09	588	17-Jun-2014	Hymenoptera	Ichneumonidae	Mesoleptidea	Kate Perez	BIN Taxonomy Match	June
GMTPZ	GMGMK	GMGMK447-14	Specimen on BOLD	BIOUG17176-D05	GMP#06026	BOLD:AAG9608	BIN on BOLD	BIOUG17176-D05	579	17-Jun-2014	Hymenoptera	Ichneumonidae	Mesoleptidea	Kate Perez	BIN Taxonomy Match	June
GMTPZ	GMGMK	GMGMK492-14	Specimen on BOLD	BIOUG17176-H02	GMP#06026	BOLD:AAG9608	BIN on BOLD	BIOUG17176-H02	588	17-Jun-2014	Hymenoptera	Ichneumonidae	Mesoleptidea	Kate Perez	BIN Taxonomy Match	June
GMTPZ	GMGMK	GMGMK501-14	Specimen on BOLD	BIOUG17176-H11	GMP#06026	BOLD:AAG9608	BIN on BOLD	BIOUG17176-H11	546	17-Jun-2014	Hymenoptera	Ichneumonidae	Mesoleptidea	Kate Perez	BIN Taxonomy Match	June
GMTPZ	GMGMK	GMGMK831-14	Specimen on BOLD	BIOUG17180-D09	GMP#06026	BOLD:AAG9608	BIN on BOLD	BIOUG17180-D09	528	17-Jun-2014	Hymenoptera	Ichneumonidae	Mesoleptidea	Kate Perez	BIN Taxonomy Match	June
GMTPZ	GMGMK	GMGMK835-14	Specimen on BOLD	BIOUG17180-E01	GMP#06026	BOLD:AAG9608	BIN on BOLD	BIOUG17180-E01	588	17-Jun-2014	Hymenoptera	Ichneumonidae	Mesoleptidea	Kate Perez	BIN Taxonomy Match	June
GMTPZ	GMGMK	GMGMK836-14	Specimen on BOLD	BIOUG17180-E02	GMP#06026	BOLD:AAG9608	BIN on BOLD	BIOUG17180-E02	579	17-Jun-2014	Hymenoptera	Ichneumonidae	Mesoleptidea	Kate Perez	BIN Taxonomy Match	June
GMTPZ	GMGML	GMGML1217-14	Specimen on BOLD	BIOUG17266-C08	GMP#06027	BOLD:AAG9608	BIN on BOLD	BIOUG17266-C08	658	01-Jul-2014	Hymenoptera	Ichneumonidae	Mesoleptidea	Kate Perez	BIN Taxonomy Match	July
GMTPZ	GMGML	GMGML1427-14	Specimen on BOLD	BIOUG17271-E04	GMP#06027	BOLD:AAG9608	BIN on BOLD	BIOUG17271-E04	582	01-Jul-2014	Hymenoptera	Ichneumonidae	Mesoleptidea	Kate Perez	BIN Taxonomy Match	July
GMTPZ	GMGMJ	GMGMJ660-14	Specimen on BOLD	BIOUG17072-G11	GMP#06025	BOLD:AAH0525	BIN on BOLD	BIOUG17072-G11	594	02-Jun-2014	Hymenoptera	Ichneumonidae	Woldstedtius	Kate Perez	BIN Taxonomy Match	June
GMTPZ	GMGMC	GMGMC1039-14	Specimen on BOLD	BIOUG16524-F12	GMP#06016	BOLD:AAH1064	BIN on BOLD	BIOUG16524-F12	561	08-Aug-2013	Hymenoptera	Braconidae	0	Kate Perez	BOLD ID Engine Manual	August
GMTPE	GMGRA	GMGRA765-13	Specimen on BOLD	BIOUG04463-F09	bayw.1	BOLD:AAH1634	BIN on BOLD	BIOUG04463-F09	658	04-May-2012	Hymenoptera	Ichneumonidae	0	Kate Perez	BIN Taxonomy Match	May
GMTPE	GMGRB	GMGRB1933-13	Specimen on BOLD	BIOUG05147-C08	bayw.3	BOLD:AAH1634	BIN on BOLD	BIOUG05147-C08	658	18-May-2012	Hymenoptera	Ichneumonidae	0	Kate Perez	BIN Taxonomy Match	May
GMTPE	GMGRC	GMGRC1301-13	Specimen on BOLD	BIOUG05398-G09	bayw.5	BOLD:AAH1774	BIN on BOLD	BIOUG05398-G09	637	08-Jun-2012	Hymenoptera	Ichneumonidae	Proclitus	Kate Perez	BIN Taxonomy Match	June
GMTPE	GMGRC	GMGRC920-13	Specimen on BOLD	BIOUG05394-D11	bayw.5	BOLD:AAH1774	BIN on BOLD	BIOUG05394-D11	588	08-Jun-2012	Hymenoptera	Ichneumonidae	Proclitus	Kate Perez	BIN Taxonomy Match	June
GMTPE	GMGRD	GMGRD1909-13	Specimen on BOLD	BIOUG05883-H02	bayw.7	BOLD:AAH1774	BIN on BOLD	BIOUG05883-H02	633	20-Jun-2012	Hymenoptera	Ichneumonidae	Proclitus	Kate Perez	BIN Taxonomy Match	June
GMTPE	GMGRD	GMGRD323-13	Specimen on BOLD	BIOUG05774-C02	bayw.7	BOLD:AAH1774	BIN on BOLD	BIOUG05774-C02	588	20-Jun-2012	Hymenoptera	Ichneumonidae	Proclitus	Kate Perez	BIN Taxonomy Match	June
GMTPZ	GMGMI	GMGMI606-14	Specimen on BOLD	BIOUG17113-C07	GMP#06024	BOLD:AAH1791	BIN on BOLD	BIOUG17113-C07	591	16-May-2014	Hymenoptera	Ichneumonidae	Syrphoctonus	Kate Perez	BOLD ID Engine Manual	May
GMTPZ	GMGMI	GMGMI661-14	Specimen on BOLD	BIOUG17113-H02	GMP#06024	BOLD:AAH1791	BIN on BOLD	BIOUG17113-H02	547	16-May-2014	Hymenoptera	Ichneumonidae	Syrphoctonus	Kate Perez	BOLD ID Engine Manual	May
GMTPZ	GMGMJ	GMGMJ1404-14	Specimen on BOLD	BIOUG17098-F07	GMP#06025	BOLD:AAH1791	BIN on BOLD	BIOUG17098-F07	591	02-Jun-2014	Hymenoptera	Ichneumonidae	Syrphoctonus	Kate Perez	BOLD ID Engine Manual	June
GMTPE	GMGRD	GMGRD974-13	Specimen on BOLD	BIOUG05397-H06	bayw.7	BOLD:AAH1855	BIN on BOLD	BIOUG05397-H06	631	20-Jun-2012	Hymenoptera	Ichneumonidae	0	Kate Perez	BIN Taxonomy Match	June
GMTPE	GMGRI	GMGRI670-13	Specimen on BOLD	BIOUG08368-B12	bayw.17	BOLD:AAH1951	BIN on BOLD	BIOUG08368-B12	658	22-Sep-2012	Hymenoptera	Ichneumonidae	0	Kate Perez	BIN Taxonomy Match	September
GMTPE	GMGRH	GMGRH090-13	Specimen on BOLD	BIOUG08212-B06	bayw.15	BOLD:AAH1955	BIN on BOLD	BIOUG08212-B06	546	03-Sep-2012	Hymenoptera	Ichneumonidae	0	Kate Perez	BIN Taxonomy Match	September
GMTPZ	GMGMB	GMGMB1251-14	Specimen on BOLD	BIOUG16280-H02	GMP#06017	BOLD:AAH1959	BIN on BOLD	BIOUG16280-H02	579	26-Aug-2013	Hymenoptera	Ichneumonidae	0	Kate Perez	BOLD ID Engine Manual	August
GMTPZ	GMGMD	GMGMD303-14	Specimen on BOLD	BIOUG16608-E04	GMP#06018	BOLD:AAH1959	BIN on BOLD	BIOUG16608-E04	658	16-Sep-2013	Hymenoptera	Ichneumonidae	0	Kate Perez	BOLD ID Engine Manual	September
GMTPZ	GMGMD	GMGMD457-14	Specimen on BOLD	BIOUG16610-B04	GMP#06018	BOLD:AAH1959	BIN on BOLD	BIOUG16610-B04	657	16-Sep-2013	Hymenoptera	Ichneumonidae	0	Kate Perez	BOLD ID Engine Manual	September
GMTPZ	GMGMI	GMGMI1353-14	Specimen on BOLD	BIOUG17135-B06	GMP#06024	BOLD:AAH1959	BIN on BOLD	BIOUG17135-B06	658	16-May-2014	Hymenoptera	Ichneumonidae	0	Kate Perez	BOLD ID Engine Manual	May
GMTPZ	GMGML	GMGML1425-14	Specimen on BOLD	BIOUG17271-E02	GMP#06027	BOLD:AAH1959	BIN on BOLD	BIOUG17271-E02	658	01-Jul-2014	Hymenoptera	Ichneumonidae	0	Kate Perez	BOLD ID Engine Manual	July
GMTPZ	GMGMJ	GMGMJ1402-14	Specimen on BOLD	BIOUG17098-F05	GMP#06025	BOLD:AAH1961	BIN on BOLD	BIOUG17098-F05	658	02-Jun-2014	Hymenoptera	Ichneumonidae	0	Kate Perez	BOLD ID Engine Manual	June
GMTPZ	GMGMM	GMGMM686-14	Specimen on BOLD	BIOUG17304-A05	GMP#06028	BOLD:AAH1965	BIN on BOLD	BIOUG17304-A05	562	15-Jul-2014	Hymenoptera	Ichneumonidae	0	Kate Perez	BOLD ID Engine Manual	July
GMTPZ	GMGMK	GMGMK269-14	Specimen on BOLD	BIOUG17174-H11	GMP#06026	BOLD:AAH2111	BIN on BOLD	BIOUG17174-H11	588	17-Jun-2014	Hymenoptera	Ichneumonidae	0	Kate Perez	BOLD ID Engine Manual	June
GMTPE	GMGRC	GMGRC1282-13	Specimen on BOLD	BIOUG05398-F02	bayw.5	BOLD:AAH2151	BIN on BOLD	BIOUG05398-F02	632	08-Jun-2012	Hymenoptera	Braconidae	Dinotrema	Kate Perez	BIN Taxonomy Match	June
GMTPE	GMGRD	GMGRD1008-13	Specimen on BOLD	BIOUG05779-C05	bayw.7	BOLD:AAH2151	BIN on BOLD	BIOUG05779-C05	609	20-Jun-2012	Hymenoptera	Braconidae	Dinotrema	Kate Perez	BIN Taxonomy Match	June
GMTPE	GMGRF	GMGRF1021-13	Specimen on BOLD	BIOUG07412-F11	bayw.11	BOLD:AAH2151	BIN on BOLD	BIOUG07412-F11	570	25-Jul-2012	Hymenoptera	Braconidae	Dinotrema	Kate Perez	BIN Taxonomy Match	July
GMTPE	GMGRF	GMGRF1953-13	Specimen on BOLD	BIOUG07562-E05	bayw.11	BOLD:AAH2151	BIN on BOLD	BIOUG07562-E05	572	25-Jul-2012	Hymenoptera	Braconidae	Dinotrema	Kate Perez	BIN Taxonomy Match	July
GMTPE	GMGRF	GMGRF4387-13	Specimen on BOLD	BIOUG07801-G06	bayw.11	BOLD:AAH2151	BIN on BOLD	BIOUG07801-G06	592	25-Jul-2012	Hymenoptera	Braconidae	Dinotrema	Kate Perez	BIN Taxonomy Match	July
GMTPE	GMGRF	GMGRF646-13	Specimen on BOLD	BIOUG07411-G04	bayw.11	BOLD:AAH2151	BIN on BOLD	BIOUG07411-G04	572	25-Jul-2012	Hymenoptera	Braconidae	Dinotrema	Kate Perez	BIN Taxonomy Match	July
GMTPE	GMGRH	GMGRH111-13	Specimen on BOLD	BIOUG08212-D03	bayw.15	BOLD:AAH2151	BIN on BOLD	BIOUG08212-D03	573	03-Sep-2012	Hymenoptera	Braconidae	Dinotrema	Kate Perez	BIN Taxonomy Match	September
GMTPZ	GMGMC	GMGMC1060-14	Specimen on BOLD	BIOUG16524-H09	GMP#06016	BOLD:AAH2172	BIN on BOLD	BIOUG16524-H09	588	08-Aug-2013	Hymenoptera	Ichneumonidae	0	Kate Perez	BOLD ID Engine Manual	August
GMTPZ	GMGMC	GMGMC990-14	Specimen on BOLD	BIOUG16524-B11	GMP#06016	BOLD:AAH2172	BIN on BOLD	BIOUG16524-B11	592	08-Aug-2013	Hymenoptera	Ichneumonidae	0	Kate Perez	BOLD ID Engine Manual	August
GMTPZ	GMGMN	GMGMN1266-14	Specimen on BOLD	BIOUG17446-D08	GMP#06029	BOLD:AAH3035	BIN on BOLD	BIOUG17446-D08	630	29-Jul-2014	Hymenoptera	Ichneumonidae	Acrotomus	Kate Perez	BOLD ID Engine Manual	July
GMTPZ	GMGMA	GMGMA1483-14	Specimen on BOLD	BIOUG16220-E03	GMP#06015	BOLD:AAH3126	BIN on BOLD	BIOUG16220-E03	588	25-Jul-2013	Hymenoptera	Braconidae	0	Kate Perez	BOLD ID Engine Manual	July
GMTPZ	GMGMD	GMGMD1155-14	Specimen on BOLD	BIOUG16617-E01	GMP#06018	BOLD:AAH3126	BIN on BOLD	BIOUG16617-E01	582	16-Sep-2013	Hymenoptera	Braconidae	0	Kate Perez	BOLD ID Engine Manual	September
GMTPZ	GMGMN	GMGMN586-14	Specimen on BOLD	BIOUG17439-C05	GMP#06029	BOLD:AAH3126	BIN on BOLD	BIOUG17439-C05	634	29-Jul-2014	Hymenoptera	Braconidae	0	Kate Perez	BOLD ID Engine Manual	July
GMTPZ	GMGMA	GMGMA150-14	Specimen on BOLD	BIOUG15978-D12	GMP#06015	BOLD:AAH3131	BIN on BOLD	BIOUG15978-D12	626	25-Jul-2013	Hymenoptera	Braconidae	0	Kate Perez	BOLD ID Engine Manual	July
GMTPZ	GMGMB	GMGMB1239-14	Specimen on BOLD	BIOUG16280-G02	GMP#06017	BOLD:AAH3131	BIN on BOLD	BIOUG16280-G02	601	26-Aug-2013	Hymenoptera	Braconidae	0	Kate Perez	BOLD ID Engine Manual	August
GMTPZ	GMGMD	GMGMD515-14	Specimen on BOLD	BIOUG16610-G02	GMP#06018	BOLD:AAH3131	BIN on BOLD	BIOUG16610-G02	658	16-Sep-2013	Hymenoptera	Braconidae	0	Kate Perez	BOLD ID Engine Manual	September
GMTPZ	GMGMD	GMGMD573-14	Specimen on BOLD	BIOUG16611-D01	GMP#06018	BOLD:AAH3131	BIN on BOLD	BIOUG16611-D01	658	16-Sep-2013	Hymenoptera	Braconidae	0	Kate Perez	BOLD ID Engine Manual	September
GMTPZ	GMGMJ	GMGMJ1272-14	Specimen on BOLD	BIOUG17097-C06	GMP#06025	BOLD:AAH3131	BIN on BOLD	BIOUG17097-C06	619	02-Jun-2014	Hymenoptera	Braconidae	0	Kate Perez	BOLD ID Engine Manual	June
GMTPZ	GMGML	GMGML1540-14	Specimen on BOLD	BIOUG17272-F10	GMP#06027	BOLD:AAH3131	BIN on BOLD	BIOUG17272-F10	585	01-Jul-2014	Hymenoptera	Braconidae	0	Kate Perez	BOLD ID Engine Manual	July
GMTPZ	GMGML	GMGML656-14	Specimen on BOLD	BIOUG17263-D05	GMP#06027	BOLD:AAH3131	BIN on BOLD	BIOUG17263-D05	658	01-Jul-2014	Hymenoptera	Braconidae	0	Kate Perez	BOLD ID Engine Manual	July
GMTPZ	GMGML	GMGML667-14	Specimen on BOLD	BIOUG17263-E04	GMP#06027	BOLD:AAH3131	BIN on BOLD	BIOUG17263-E04	658	01-Jul-2014	Hymenoptera	Braconidae	0	Kate Perez	BOLD ID Engine Manual	July
GMTPZ	GMGML	GMGML904-14	Specimen on BOLD	BIOUG17267-A04	GMP#06027	BOLD:AAH3131	BIN on BOLD	BIOUG17267-A04	591	01-Jul-2014	Hymenoptera	Braconidae	0	Kate Perez	BOLD ID Engine Manual	July
GMTPZ	GMGMM	GMGMM684-14	Specimen on BOLD	BIOUG17304-A03	GMP#06028	BOLD:AAH3131	BIN on BOLD	BIOUG17304-A03	564	15-Jul-2014	Hymenoptera	Braconidae	0	Kate Perez	BOLD ID Engine Manual	July
GMTPZ	GMGMM	GMGMM688-14	Specimen on BOLD	BIOUG17304-A07	GMP#06028	BOLD:AAH3131	BIN on BOLD	BIOUG17304-A07	591	15-Jul-2014	Hymenoptera	Braconidae	0	Kate Perez	BOLD ID Engine Manual	July
GMTPZ	GMGMM	GMGMM948-14	Specimen on BOLD	BIOUG17373-G05	GMP#06028	BOLD:AAH3131	BIN on BOLD	BIOUG17373-G05	588	15-Jul-2014	Hymenoptera	Braconidae	0	Kate Perez	BOLD ID Engine Manual	July
GMTPZ	GMGMA	GMGMA104-14	Specimen on BOLD	BIOUG15978-A02	GMP#06015	BOLD:AAH3139	BIN on BOLD	BIOUG15978-A02	610	25-Jul-2013	Hymenoptera	Braconidae	0	Kate Perez	BOLD ID Engine Manual	July
GMTPZ	GMGMJ	GMGMJ1435-14	Specimen on BOLD	BIOUG17099-A03	GMP#06025	BOLD:AAH3139	BIN on BOLD	BIOUG17099-A03	619	02-Jun-2014	Hymenoptera	Braconidae	0	Kate Perez	BOLD ID Engine Manual	June
GMTPZ	GMGMN	GMGMN571-14	Specimen on BOLD	BIOUG17439-B02	GMP#06029	BOLD:AAH3139	BIN on BOLD	BIOUG17439-B02	627	29-Jul-2014	Hymenoptera	Braconidae	0	Kate Perez	BOLD ID Engine Manual	July
GMTPE	GMGRH	GMGRH098-13	Specimen on BOLD	BIOUG08212-C02	bayw.15	BOLD:AAH3140	BIN on BOLD	BIOUG08212-C02	596	03-Sep-2012	Hymenoptera	Braconidae	0	Kate Perez	BIN Taxonomy Match	September
GMTPE	GMGRH	GMGRH2514-13	Specimen on BOLD	BIOUG08359-B07	bayw.15	BOLD:AAH3140	BIN on BOLD	BIOUG08359-B07	576	03-Sep-2012	Hymenoptera	Braconidae	0	Kate Perez	BIN Taxonomy Match	September
GMTPZ	GMGMD	GMGMD468-14	Specimen on BOLD	BIOUG16610-C03	GMP#06018	BOLD:AAH3150	BIN on BOLD	BIOUG16610-C03	658	16-Sep-2013	Hymenoptera	Braconidae	0	Kate Perez	BOLD ID Engine Manual	September
GMTPE	GMGRB	GMGRB1423-13	Specimen on BOLD	BIOUG05261-D08	bayw.3	BOLD:AAH3151	BIN on BOLD	BIOUG05261-D08	658	22-May-2012	Hymenoptera	Braconidae	Dacnusa	Kate Perez	BIN Taxonomy Match	May
GMTPZ	GMGMM	GMGMM1058-14	Specimen on BOLD	BIOUG17374-H08	GMP#06028	BOLD:AAH3870	BIN on BOLD	BIOUG17374-H08	658	15-Jul-2014	Hymenoptera	Ichneumonidae	Rhembobius	Kate Perez	BIN Taxonomy Match	July
GMTPZ	GMGMC	GMGMC934-14	Specimen on BOLD	BIOUG16523-F02	GMP#06016	BOLD:AAH7398	BIN on BOLD	BIOUG16523-F02	594	08-Aug-2013	Hymenoptera	Braconidae	Lysiphlebus	Kate Perez	BIN Taxonomy Match	August
GMTPZ	GMGML	GMGML680-14	Specimen on BOLD	BIOUG17263-F05	GMP#06027	BOLD:AAH7398	BIN on BOLD	BIOUG17263-F05	600	01-Jul-2014	Hymenoptera	Braconidae	Lysiphlebus	Kate Perez	BIN Taxonomy Match	July
GMTPZ	GMGMC	GMGMC410-14	Specimen on BOLD	BIOUG16359-D12	GMP#06016	BOLD:AAH9349	BIN on BOLD	BIOUG16359-D12	576	08-Aug-2013	Hymenoptera	Ichneumonidae	Pimpla	Kate Perez	BIN Taxonomy Match	August
GMTPZ	GMGMD	GMGMD320-14	Specimen on BOLD	BIOUG16608-F09	GMP#06018	BOLD:AAH9349	BIN on BOLD	BIOUG16608-F09	570	16-Sep-2013	Hymenoptera	Ichneumonidae	Pimpla	Kate Perez	BIN Taxonomy Match	September
GMTPZ	GMGMJ	GMGMJ1309-14	Specimen on BOLD	BIOUG17097-F07	GMP#06025	BOLD:AAH9349	BIN on BOLD	BIOUG17097-F07	588	02-Jun-2014	Hymenoptera	Ichneumonidae	Pimpla	Kate Perez	BIN Taxonomy Match	June
GMTPZ	GMGMJ	GMGMJ608-14	Specimen on BOLD	BIOUG17072-C07	GMP#06025	BOLD:AAH9349	BIN on BOLD	BIOUG17072-C07	600	02-Jun-2014	Hymenoptera	Ichneumonidae	Pimpla	Kate Perez	BIN Taxonomy Match	June
GMTPZ	GMGMJ	GMGMJ951-14	Specimen on BOLD	BIOUG17093-H05	GMP#06025	BOLD:AAH9349	BIN on BOLD	BIOUG17093-H05	588	02-Jun-2014	Hymenoptera	Ichneumonidae	Pimpla	Kate Perez	BIN Taxonomy Match	June
GMTPZ	GMGMN	GMGMN607-14	Specimen on BOLD	BIOUG17439-E02	GMP#06029	BOLD:AAH9349	BIN on BOLD	BIOUG17439-E02	582	29-Jul-2014	Hymenoptera	Ichneumonidae	Pimpla	Kate Perez	BIN Taxonomy Match	July
GMTPZ	GMGMN	GMGMN897-14	Specimen on BOLD	BIOUG17442-E07	GMP#06029	BOLD:AAH9349	BIN on BOLD	BIOUG17442-E07	579	29-Jul-2014	Hymenoptera	Ichneumonidae	Pimpla	Kate Perez	BIN Taxonomy Match	July
GMTPZ	GMGMB	GMGMB598-14	Specimen on BOLD	BIOUG16274-A03	GMP#06017	BOLD:AAH9350	BIN on BOLD	BIOUG16274-A03	511	26-Aug-2013	Hymenoptera	Ichneumonidae	Pimpla	Kate Perez	BOLD ID Engine Manual	August
GMTPZ	GMGMD	GMGMD274-14	Specimen on BOLD	BIOUG16608-B11	GMP#06018	BOLD:AAH9350	BIN on BOLD	BIOUG16608-B11	591	16-Sep-2013	Hymenoptera	Ichneumonidae	Pimpla	Kate Perez	BOLD ID Engine Manual	September
GMTPZ	GMGMD	GMGMD297-14	Specimen on BOLD	BIOUG16608-D10	GMP#06018	BOLD:AAH9350	BIN on BOLD	BIOUG16608-D10	585	16-Sep-2013	Hymenoptera	Ichneumonidae	Pimpla	Kate Perez	BOLD ID Engine Manual	September
GMTPZ	GMGMD	GMGMD316-14	Specimen on BOLD	BIOUG16608-F05	GMP#06018	BOLD:AAH9350	BIN on BOLD	BIOUG16608-F05	588	16-Sep-2013	Hymenoptera	Ichneumonidae	Pimpla	Kate Perez	BOLD ID Engine Manual	September
GMTPZ	GMGMD	GMGMD438-14	Specimen on BOLD	BIOUG16609-H08	GMP#06018	BOLD:AAH9350	BIN on BOLD	BIOUG16609-H08	582	16-Sep-2013	Hymenoptera	Ichneumonidae	Pimpla	Kate Perez	BOLD ID Engine Manual	September
GMTPZ	GMGMI	GMGMI1400-14	Specimen on BOLD	BIOUG17135-F05	GMP#06024	BOLD:AAH9350	BIN on BOLD	BIOUG17135-F05	567	16-May-2014	Hymenoptera	Ichneumonidae	Pimpla	Kate Perez	BOLD ID Engine Manual	May
GMTPZ	GMGMI	GMGMI403-14	Specimen on BOLD	BIOUG17111-B06	GMP#06024	BOLD:AAH9350	BIN on BOLD	BIOUG17111-B06	555	16-May-2014	Hymenoptera	Ichneumonidae	Pimpla	Kate Perez	BOLD ID Engine Manual	May
GMTPZ	GMGMI	GMGMI436-14	Specimen on BOLD	BIOUG17111-E03	GMP#06024	BOLD:AAH9350	BIN on BOLD	BIOUG17111-E03	579	16-May-2014	Hymenoptera	Ichneumonidae	Pimpla	Kate Perez	BOLD ID Engine Manual	May
GMTPZ	GMGMI	GMGMI475-14	Specimen on BOLD	BIOUG17111-H06	GMP#06024	BOLD:AAH9350	BIN on BOLD	BIOUG17111-H06	588	16-May-2014	Hymenoptera	Ichneumonidae	Pimpla	Kate Perez	BOLD ID Engine Manual	May
GMTPZ	GMGMJ	GMGMJ1260-14	Specimen on BOLD	BIOUG17097-B06	GMP#06025	BOLD:AAH9350	BIN on BOLD	BIOUG17097-B06	591	02-Jun-2014	Hymenoptera	Ichneumonidae	Pimpla	Kate Perez	BOLD ID Engine Manual	June
GMTPZ	GMGMJ	GMGMJ1308-14	Specimen on BOLD	BIOUG17097-F06	GMP#06025	BOLD:AAH9350	BIN on BOLD	BIOUG17097-F06	588	02-Jun-2014	Hymenoptera	Ichneumonidae	Pimpla	Kate Perez	BOLD ID Engine Manual	June
GMTPZ	GMGMJ	GMGMJ584-14	Specimen on BOLD	BIOUG17072-A07	GMP#06025	BOLD:AAH9350	BIN on BOLD	BIOUG17072-A07	508	02-Jun-2014	Hymenoptera	Ichneumonidae	Pimpla	Kate Perez	BOLD ID Engine Manual	June
GMTPZ	GMGMJ	GMGMJ586-14	Specimen on BOLD	BIOUG17072-A09	GMP#06025	BOLD:AAH9350	BIN on BOLD	BIOUG17072-A09	600	02-Jun-2014	Hymenoptera	Ichneumonidae	Pimpla	Kate Perez	BOLD ID Engine Manual	June
GMTPZ	GMGMJ	GMGMJ606-14	Specimen on BOLD	BIOUG17072-C05	GMP#06025	BOLD:AAH9350	BIN on BOLD	BIOUG17072-C05	600	02-Jun-2014	Hymenoptera	Ichneumonidae	Pimpla	Kate Perez	BOLD ID Engine Manual	June
GMTPZ	GMGMJ	GMGMJ609-14	Specimen on BOLD	BIOUG17072-C08	GMP#06025	BOLD:AAH9350	BIN on BOLD	BIOUG17072-C08	599	02-Jun-2014	Hymenoptera	Ichneumonidae	Pimpla	Kate Perez	BOLD ID Engine Manual	June
GMTPZ	GMGMJ	GMGMJ649-14	Specimen on BOLD	BIOUG17072-F12	GMP#06025	BOLD:AAH9350	BIN on BOLD	BIOUG17072-F12	502	02-Jun-2014	Hymenoptera	Ichneumonidae	Pimpla	Kate Perez	BOLD ID Engine Manual	June
GMTPZ	GMGMJ	GMGMJ667-14	Specimen on BOLD	BIOUG17072-H06	GMP#06025	BOLD:AAH9350	BIN on BOLD	BIOUG17072-H06	584	02-Jun-2014	Hymenoptera	Ichneumonidae	Pimpla	Kate Perez	BOLD ID Engine Manual	June
GMTPZ	GMGMJ	GMGMJ671-14	Specimen on BOLD	BIOUG17072-H10	GMP#06025	BOLD:AAH9350	BIN on BOLD	BIOUG17072-H10	555	02-Jun-2014	Hymenoptera	Ichneumonidae	Pimpla	Kate Perez	BOLD ID Engine Manual	June
GMTPZ	GMGMJ	GMGMJ894-14	Specimen on BOLD	BIOUG17093-C08	GMP#06025	BOLD:AAH9350	BIN on BOLD	BIOUG17093-C08	588	02-Jun-2014	Hymenoptera	Ichneumonidae	Pimpla	Kate Perez	BOLD ID Engine Manual	June
GMTPZ	GMGMJ	GMGMJ901-14	Specimen on BOLD	BIOUG17093-D03	GMP#06025	BOLD:AAH9350	BIN on BOLD	BIOUG17093-D03	591	02-Jun-2014	Hymenoptera	Ichneumonidae	Pimpla	Kate Perez	BOLD ID Engine Manual	June
GMTPZ	GMGMK	GMGMK1098-14	Specimen on BOLD	BIOUG17222-C03	GMP#06026	BOLD:AAH9350	BIN on BOLD	BIOUG17222-C03	591	17-Jun-2014	Hymenoptera	Ichneumonidae	Pimpla	Kate Perez	BOLD ID Engine Manual	June
GMTPZ	GMGMK	GMGMK462-14	Specimen on BOLD	BIOUG17176-E08	GMP#06026	BOLD:AAH9350	BIN on BOLD	BIOUG17176-E08	608	17-Jun-2014	Hymenoptera	Ichneumonidae	Pimpla	Kate Perez	BOLD ID Engine Manual	June
GMTPZ	GMGML	GMGML1464-14	Specimen on BOLD	BIOUG17271-H05	GMP#06027	BOLD:AAH9350	BIN on BOLD	BIOUG17271-H05	555	01-Jul-2014	Hymenoptera	Ichneumonidae	Pimpla	Kate Perez	BOLD ID Engine Manual	July
GMTPZ	GMGML	GMGML334-14	Specimen on BOLD	BIOUG17231-A04	GMP#06027	BOLD:AAH9350	BIN on BOLD	BIOUG17231-A04	576	01-Jul-2014	Hymenoptera	Ichneumonidae	Pimpla	Kate Perez	BOLD ID Engine Manual	July
GMTPZ	GMGML	GMGML355-14	Specimen on BOLD	BIOUG17231-C01	GMP#06027	BOLD:AAH9350	BIN on BOLD	BIOUG17231-C01	577	01-Jul-2014	Hymenoptera	Ichneumonidae	Pimpla	Kate Perez	BOLD ID Engine Manual	July
GMTPZ	GMGML	GMGML404-14	Specimen on BOLD	BIOUG17231-G02	GMP#06027	BOLD:AAH9350	BIN on BOLD	BIOUG17231-G02	591	01-Jul-2014	Hymenoptera	Ichneumonidae	Pimpla	Kate Perez	BOLD ID Engine Manual	July
GMTPZ	GMGML	GMGML981-14	Specimen on BOLD	BIOUG17267-G09	GMP#06027	BOLD:AAH9350	BIN on BOLD	BIOUG17267-G09	561	01-Jul-2014	Hymenoptera	Ichneumonidae	Pimpla	Kate Perez	BOLD ID Engine Manual	July
GMTPZ	GMGMM	GMGMM737-14	Specimen on BOLD	BIOUG17304-E08	GMP#06028	BOLD:AAH9350	BIN on BOLD	BIOUG17304-E08	591	15-Jul-2014	Hymenoptera	Ichneumonidae	Pimpla	Kate Perez	BOLD ID Engine Manual	July
GMTPZ	GMGMN	GMGMN1350-14	Specimen on BOLD	BIOUG17447-C09	GMP#06029	BOLD:AAH9350	BIN on BOLD	BIOUG17447-C09	608	29-Jul-2014	Hymenoptera	Ichneumonidae	Acrotomus	Kate Perez	BOLD ID Engine Manual	July
GMTPZ	GMGMN	GMGMN1396-14	Specimen on BOLD	BIOUG17447-G07	GMP#06029	BOLD:AAH9350	BIN on BOLD	BIOUG17447-G07	555	29-Jul-2014	Hymenoptera	Ichneumonidae	Acrotomus	Kate Perez	BOLD ID Engine Manual	July
GMTPZ	GMGMN	GMGMN548-14	Specimen on BOLD	BIOUG17438-H02	GMP#06029	BOLD:AAH9350	BIN on BOLD	BIOUG17438-H02	570	29-Jul-2014	Hymenoptera	Ichneumonidae	Pimpla	Kate Perez	BOLD ID Engine Manual	July
GMTPZ	GMGMN	GMGMN899-14	Specimen on BOLD	BIOUG17442-E09	GMP#06029	BOLD:AAH9350	BIN on BOLD	BIOUG17442-E09	588	29-Jul-2014	Hymenoptera	Ichneumonidae	Pimpla	Kate Perez	BOLD ID Engine Manual	July
GMTPZ	GMGMI	GMGMI077-14	Specimen on BOLD	BIOUG17084-F12	GMP#06024	BOLD:AAH9767	BIN on BOLD	BIOUG17084-F12	564	16-May-2014	Hymenoptera	Tenthredinidae	Tenthredo	Kate Perez	BIN Taxonomy Match	May
GMTPZ	GMGMB	GMGMB645-14	Specimen on BOLD	BIOUG16274-E02	GMP#06017	BOLD:AAI1121	BIN on BOLD	BIOUG16274-E02	658	26-Aug-2013	Hymenoptera	Ichneumonidae	Listrodomus	Kate Perez	BIN Taxonomy Match	August
GMTPZ	GMGMC	GMGMC743-14	Specimen on BOLD	BIOUG16520-H09	GMP#06016	BOLD:AAI1121	BIN on BOLD	BIOUG16520-H09	658	08-Aug-2013	Hymenoptera	Ichneumonidae	Listrodomus	Kate Perez	BIN Taxonomy Match	August
GMTPZ	GMGMK	GMGMK837-14	Specimen on BOLD	BIOUG17180-E03	GMP#06026	BOLD:AAI1657	BIN on BOLD	BIOUG17180-E03	658	17-Jun-2014	Hymenoptera	Braconidae	Macrocentrus	Kate Perez	BIN Taxonomy Match	June
GMTPZ	GMGMK	GMGMK419-14	Specimen on BOLD	BIOUG17176-B01	GMP#06026	BOLD:AAI1876	BIN on BOLD	BIOUG17176-B01	633	17-Jun-2014	Hymenoptera	Braconidae	Homolobus	Kate Perez	BIN Taxonomy Match	June
GMTPZ	GMGMM	GMGMM1056-14	Specimen on BOLD	BIOUG17374-H06	GMP#06028	BOLD:AAI2531	BIN on BOLD	BIOUG17374-H06	588	15-Jul-2014	Hymenoptera	Ichneumonidae	Perithous	Kate Perez	BIN Taxonomy Match	July
GMTPZ	GMGMJ	GMGMJ381-14	Specimen on BOLD	BIOUG16899-G12	GMP#06025	BOLD:AAI2575	BIN on BOLD	BIOUG16899-G12	658	02-Jun-2014	Hymenoptera	Ichneumonidae	Oxytorus	Kate Perez	BIN Taxonomy Match	June
GMTPZ	GMGMJ	GMGMJ1448-14	Specimen on BOLD	BIOUG17099-B04	GMP#06025	BOLD:AAI2695	BIN on BOLD	BIOUG17099-B04	633	02-Jun-2014	Hymenoptera	Ichneumonidae	0	Kate Perez	BOLD ID Engine Manual	June
GMTPZ	GMGMM	GMGMM426-14	Specimen on BOLD	BIOUG17301-C06	GMP#06028	BOLD:AAI2695	BIN on BOLD	BIOUG17301-C06	571	15-Jul-2014	Hymenoptera	Ichneumonidae	0	Kate Perez	BOLD ID Engine Manual	July
GMTPZ	GMGMB	GMGMB139-14	Specimen on BOLD	BIOUG16269-B07	GMP#06017	BOLD:AAI2846	BIN on BOLD	BIOUG16269-B07	591	26-Aug-2013	Hymenoptera	Braconidae	Pholetesor	Kate Perez	BIN Taxonomy Match	August
GMTPZ	GMGMA	GMGMA1126-14	Specimen on BOLD	BIOUG16216-G02	GMP#06015	BOLD:AAI3000	BIN on BOLD	BIOUG16216-G02	567	25-Jul-2013	Hymenoptera	Ichneumonidae	Phygadeuon	Kate Perez	BOLD ID Engine Manual	July
GMTPZ	GMGMA	GMGMA146-14	Specimen on BOLD	BIOUG15978-D08	GMP#06015	BOLD:AAI3000	BIN on BOLD	BIOUG15978-D08	613	25-Jul-2013	Hymenoptera	Ichneumonidae	Phygadeuon	Kate Perez	BOLD ID Engine Manual	July
GMTPZ	GMGMB	GMGMB1181-14	Specimen on BOLD	BIOUG16280-B04	GMP#06017	BOLD:AAI3000	BIN on BOLD	BIOUG16280-B04	567	26-Aug-2013	Hymenoptera	Ichneumonidae	Phygadeuon	Kate Perez	BOLD ID Engine Manual	August
GMTPZ	GMGMB	GMGMB1500-14	Specimen on BOLD	BIOUG16354-C05	GMP#06017	BOLD:AAI3000	BIN on BOLD	BIOUG16354-C05	564	26-Aug-2013	Hymenoptera	Ichneumonidae	Phygadeuon	Kate Perez	BOLD ID Engine Manual	August
GMTPZ	GMGMB	GMGMB668-14	Specimen on BOLD	BIOUG16274-G01	GMP#06017	BOLD:AAI3000	BIN on BOLD	BIOUG16274-G01	552	26-Aug-2013	Hymenoptera	Ichneumonidae	Phygadeuon	Kate Perez	BOLD ID Engine Manual	August
GMTPZ	GMGMB	GMGMB688-14	Specimen on BOLD	BIOUG16274-H09	GMP#06017	BOLD:AAI3000	BIN on BOLD	BIOUG16274-H09	576	26-Aug-2013	Hymenoptera	Ichneumonidae	Phygadeuon	Kate Perez	BOLD ID Engine Manual	August
GMTPZ	GMGMC	GMGMC425-14	Specimen on BOLD	BIOUG16359-F03	GMP#06016	BOLD:AAI3000	BIN on BOLD	BIOUG16359-F03	346	08-Aug-2013	Hymenoptera	Ichneumonidae	Phygadeuon	Kate Perez	BOLD ID Engine Manual	August
GMTPZ	GMGMJ	GMGMJ1277-14	Specimen on BOLD	BIOUG17097-C11	GMP#06025	BOLD:AAI3000	BIN on BOLD	BIOUG17097-C11	552	02-Jun-2014	Hymenoptera	Ichneumonidae	Phygadeuon	Kate Perez	BOLD ID Engine Manual	June
GMTPZ	GMGMK	GMGMK770-14	Specimen on BOLD	BIOUG17179-G07	GMP#06026	BOLD:AAI3000	BIN on BOLD	BIOUG17179-G07	576	17-Jun-2014	Hymenoptera	Ichneumonidae	Phygadeuon	Kate Perez	BOLD ID Engine Manual	June
GMTPZ	GMGML	GMGML698-14	Specimen on BOLD	BIOUG17263-G11	GMP#06027	BOLD:AAI3000	BIN on BOLD	BIOUG17263-G11	618	01-Jul-2014	Hymenoptera	Ichneumonidae	Phygadeuon	Kate Perez	BOLD ID Engine Manual	July
GMTPZ	GMGML	GMGML946-14	Specimen on BOLD	BIOUG17267-D10	GMP#06027	BOLD:AAI3000	BIN on BOLD	BIOUG17267-D10	588	01-Jul-2014	Hymenoptera	Ichneumonidae	Phygadeuon	Kate Perez	BOLD ID Engine Manual	July
GMTPZ	GMGMM	GMGMM697-14	Specimen on BOLD	BIOUG17304-B04	GMP#06028	BOLD:AAI3000	BIN on BOLD	BIOUG17304-B04	567	15-Jul-2014	Hymenoptera	Ichneumonidae	Phygadeuon	Kate Perez	BOLD ID Engine Manual	July
GMTPZ	GMGMM	GMGMM887-14	Specimen on BOLD	BIOUG17373-B04	GMP#06028	BOLD:AAI3000	BIN on BOLD	BIOUG17373-B04	588	15-Jul-2014	Hymenoptera	Ichneumonidae	Phygadeuon	Kate Perez	BOLD ID Engine Manual	July
GMTPZ	GMGMM	GMGMM935-14	Specimen on BOLD	BIOUG17373-F04	GMP#06028	BOLD:AAI3000	BIN on BOLD	BIOUG17373-F04	579	15-Jul-2014	Hymenoptera	Ichneumonidae	Phygadeuon	Kate Perez	BOLD ID Engine Manual	July
GMTPZ	GMGMN	GMGMN909-14	Specimen on BOLD	BIOUG17442-F07	GMP#06029	BOLD:AAI3000	BIN on BOLD	BIOUG17442-F07	588	29-Jul-2014	Hymenoptera	Ichneumonidae	Phygadeuon	Kate Perez	BOLD ID Engine Manual	July
GMTPZ	GMGMK	GMGMK715-14	Specimen on BOLD	BIOUG17179-B12	GMP#06026	BOLD:AAI3467	BIN on BOLD	BIOUG17179-B12	534	17-Jun-2014	Hymenoptera	Ichneumonidae	0	Kate Perez	BOLD ID Engine Manual	June
GMTPZ	GMGMN	GMGMN1221-14	Specimen on BOLD	BIOUG17445-H10	GMP#06029	BOLD:AAI3467	BIN on BOLD	BIOUG17445-H10	658	29-Jul-2014	Hymenoptera	Ichneumonidae	0	Kate Perez	BOLD ID Engine Manual	July
GMTPZ	GMGMN	GMGMN911-14	Specimen on BOLD	BIOUG17442-F09	GMP#06029	BOLD:AAI3467	BIN on BOLD	BIOUG17442-F09	579	29-Jul-2014	Hymenoptera	Ichneumonidae	0	Kate Perez	BOLD ID Engine Manual	July
GMTPZ	GMGMA	GMGMA423-14	Specimen on BOLD	BIOUG16209-C12	GMP#06015	BOLD:AAI4109	BIN on BOLD	BIOUG16209-C12	525	25-Jul-2013	Hymenoptera	Ichneumonidae	Coelichneumon	Kate Perez	BIN Taxonomy Match	July
GMTPZ	GMGMI	GMGMI083-14	Specimen on BOLD	BIOUG17084-G06	GMP#06024	BOLD:AAI4109	BIN on BOLD	BIOUG17084-G06	564	16-May-2014	Hymenoptera	Ichneumonidae	Coelichneumon	Kate Perez	BIN Taxonomy Match	May
GMTPZ	GMGMI	GMGMI099-14	Specimen on BOLD	BIOUG17084-H10	GMP#06024	BOLD:AAI4109	BIN on BOLD	BIOUG17084-H10	540	16-May-2014	Hymenoptera	Ichneumonidae	Coelichneumon	Kate Perez	BIN Taxonomy Match	May
GMTPZ	GMGMI	GMGMI274-14	Specimen on BOLD	BIOUG17086-G07	GMP#06024	BOLD:AAI4109	BIN on BOLD	BIOUG17086-G07	579	16-May-2014	Hymenoptera	Ichneumonidae	Coelichneumon	Kate Perez	BIN Taxonomy Match	May
GMTPZ	GMGMI	GMGMI428-14	Specimen on BOLD	BIOUG17111-D07	GMP#06024	BOLD:AAI4109	BIN on BOLD	BIOUG17111-D07	576	16-May-2014	Hymenoptera	Ichneumonidae	Coelichneumon	Kate Perez	BIN Taxonomy Match	May
GMTPZ	GMGMJ	GMGMJ116-14	Specimen on BOLD	BIOUG17068-H11	GMP#06025	BOLD:AAI4109	BIN on BOLD	BIOUG17068-H11	579	02-Jun-2014	Hymenoptera	Ichneumonidae	Coelichneumon	Kate Perez	BIN Taxonomy Match	June
GMTPZ	GMGMJ	GMGMJ141-14	Specimen on BOLD	BIOUG17069-C01	GMP#06025	BOLD:AAI4109	BIN on BOLD	BIOUG17069-C01	576	02-Jun-2014	Hymenoptera	Ichneumonidae	Coelichneumon	Kate Perez	BIN Taxonomy Match	June
GMTPZ	GMGMK	GMGMK414-14	Specimen on BOLD	BIOUG17176-A08	GMP#06026	BOLD:AAI4109	BIN on BOLD	BIOUG17176-A08	576	17-Jun-2014	Hymenoptera	Ichneumonidae	Coelichneumon	Kate Perez	BIN Taxonomy Match	June
GMTPZ	GMGML	GMGML181-14	Specimen on BOLD	BIOUG17229-G10	GMP#06027	BOLD:AAI4109	BIN on BOLD	BIOUG17229-G10	527	01-Jul-2014	Hymenoptera	Ichneumonidae	Coelichneumon	Kate Perez	BIN Taxonomy Match	July
GMTPZ	GMGML	GMGML184-14	Specimen on BOLD	BIOUG17229-H01	GMP#06027	BOLD:AAI4109	BIN on BOLD	BIOUG17229-H01	533	01-Jul-2014	Hymenoptera	Ichneumonidae	Coelichneumon	Kate Perez	BIN Taxonomy Match	July
GMTPZ	GMGML	GMGML195-14	Specimen on BOLD	BIOUG17230-A01	GMP#06027	BOLD:AAI4109	BIN on BOLD	BIOUG17230-A01	603	01-Jul-2014	Hymenoptera	Ichneumonidae	Coelichneumon	Kate Perez	BIN Taxonomy Match	July
GMTPZ	GMGML	GMGML197-14	Specimen on BOLD	BIOUG17230-A03	GMP#06027	BOLD:AAI4109	BIN on BOLD	BIOUG17230-A03	588	01-Jul-2014	Hymenoptera	Ichneumonidae	Coelichneumon	Kate Perez	BIN Taxonomy Match	July
GMTPZ	GMGML	GMGML199-14	Specimen on BOLD	BIOUG17230-A05	GMP#06027	BOLD:AAI4109	BIN on BOLD	BIOUG17230-A05	576	01-Jul-2014	Hymenoptera	Ichneumonidae	Coelichneumon	Kate Perez	BIN Taxonomy Match	July
GMTPZ	GMGML	GMGML204-14	Specimen on BOLD	BIOUG17230-A10	GMP#06027	BOLD:AAI4109	BIN on BOLD	BIOUG17230-A10	563	01-Jul-2014	Hymenoptera	Ichneumonidae	Coelichneumon	Kate Perez	BIN Taxonomy Match	July
GMTPZ	GMGML	GMGML358-14	Specimen on BOLD	BIOUG17231-C04	GMP#06027	BOLD:AAI4109	BIN on BOLD	BIOUG17231-C04	588	01-Jul-2014	Hymenoptera	Ichneumonidae	Coelichneumon	Kate Perez	BIN Taxonomy Match	July
GMTPZ	GMGMM	GMGMM1084-14	Specimen on BOLD	BIOUG17375-B11	GMP#06028	BOLD:AAI4109	BIN on BOLD	BIOUG17375-B11	591	15-Jul-2014	Hymenoptera	Ichneumonidae	Coelichneumon	Kate Perez	BIN Taxonomy Match	July
GMTPZ	GMGMM	GMGMM323-14	Specimen on BOLD	BIOUG17299-C12	GMP#06028	BOLD:AAI4109	BIN on BOLD	BIOUG17299-C12	603	15-Jul-2014	Hymenoptera	Ichneumonidae	Coelichneumon	Kate Perez	BIN Taxonomy Match	July
GMTPZ	GMGMB	GMGMB1401-14	Specimen on BOLD	BIOUG16352-D10	GMP#06017	BOLD:AAI4432	BIN on BOLD	BIOUG16352-D10	658	26-Aug-2013	Hymenoptera	Ichneumonidae	0	Kate Perez	BOLD ID Engine Manual	August
GMTPZ	GMGMA	GMGMA1189-14	Specimen on BOLD	BIOUG16217-D06	GMP#06015	BOLD:AAI4650	BIN on BOLD	BIOUG16217-D06	621	25-Jul-2013	Hymenoptera	Braconidae	Blacus	Kate Perez	BIN Taxonomy Match	July
GMTPZ	GMGMC	GMGMC1001-14	Specimen on BOLD	BIOUG16524-C10	GMP#06016	BOLD:AAI4650	BIN on BOLD	BIOUG16524-C10	576	08-Aug-2013	Hymenoptera	Braconidae	Blacus	Kate Perez	BIN Taxonomy Match	August
GMTPZ	GMGMC	GMGMC1021-14	Specimen on BOLD	BIOUG16524-E06	GMP#06016	BOLD:AAI4650	BIN on BOLD	BIOUG16524-E06	576	08-Aug-2013	Hymenoptera	Braconidae	Blacus	Kate Perez	BIN Taxonomy Match	August
GMTPZ	GMGMC	GMGMC1049-14	Specimen on BOLD	BIOUG16524-G10	GMP#06016	BOLD:AAI4650	BIN on BOLD	BIOUG16524-G10	585	08-Aug-2013	Hymenoptera	Braconidae	Blacus	Kate Perez	BIN Taxonomy Match	August
GMTPZ	GMGMC	GMGMC369-14	Specimen on BOLD	BIOUG16359-A07	GMP#06016	BOLD:AAI4650	BIN on BOLD	BIOUG16359-A07	591	08-Aug-2013	Hymenoptera	Braconidae	Blacus	Kate Perez	BIN Taxonomy Match	August
GMTPZ	GMGMC	GMGMC895-14	Specimen on BOLD	BIOUG16523-B11	GMP#06016	BOLD:AAI4650	BIN on BOLD	BIOUG16523-B11	658	08-Aug-2013	Hymenoptera	Braconidae	Blacus	Kate Perez	BIN Taxonomy Match	August
GMTPZ	GMGMI	GMGMI1345-14	Specimen on BOLD	BIOUG17135-A10	GMP#06024	BOLD:AAI4650	BIN on BOLD	BIOUG17135-A10	658	16-May-2014	Hymenoptera	Braconidae	Blacus	Kate Perez	BIN Taxonomy Match	May
GMTPZ	GMGMI	GMGMI1396-14	Specimen on BOLD	BIOUG17135-F01	GMP#06024	BOLD:AAI4650	BIN on BOLD	BIOUG17135-F01	658	16-May-2014	Hymenoptera	Braconidae	Blacus	Kate Perez	BIN Taxonomy Match	May
GMTPZ	GMGML	GMGML674-14	Specimen on BOLD	BIOUG17263-E11	GMP#06027	BOLD:AAI4650	BIN on BOLD	BIOUG17263-E11	658	01-Jul-2014	Hymenoptera	Braconidae	Blacus	Kate Perez	BIN Taxonomy Match	July
GMTPZ	GMGMM	GMGMM729-14	Specimen on BOLD	BIOUG17304-D12	GMP#06028	BOLD:AAI4650	BIN on BOLD	BIOUG17304-D12	585	15-Jul-2014	Hymenoptera	Braconidae	Blacus	Kate Perez	BIN Taxonomy Match	July
GMTPE	GMGRD	GMGRD1885-13	Specimen on BOLD	BIOUG05883-F02	bayw.7	BOLD:AAI4827	BIN on BOLD	BIOUG05883-F02	658	20-Jun-2012	Hymenoptera	Braconidae	Ascogaster	Kate Perez	BIN Taxonomy Match	June
GMTPE	GMGRF	GMGRF5418-13	Specimen on BOLD	BIOUG07386-E02	bayw.11	BOLD:AAI4827	BIN on BOLD	BIOUG07386-E02	658	25-Jul-2012	Hymenoptera	Braconidae	Ascogaster	Kate Perez	BOLD ID Engine Manual	July
GMTPZ	GMGMB	GMGMB845-14	Specimen on BOLD	BIOUG16276-E12	GMP#06017	BOLD:AAI4919	BIN on BOLD	BIOUG16276-E12	570	26-Aug-2013	Hymenoptera	Braconidae	0	Kate Perez	BIN Taxonomy Match	August
GMTPZ	GMGMC	GMGMC386-14	Specimen on BOLD	BIOUG16359-B12	GMP#06016	BOLD:AAI4919	BIN on BOLD	BIOUG16359-B12	658	08-Aug-2013	Hymenoptera	Braconidae	0	Kate Perez	BIN Taxonomy Match	August
GMTPZ	GMGMD	GMGMD183-14	Specimen on BOLD	BIOUG16607-C03	GMP#06018	BOLD:AAI5161	BIN on BOLD	BIOUG16607-C03	560	16-Sep-2013	Hymenoptera	Ichneumonidae	Enicospilus	Kate Perez	BIN Taxonomy Match	September
GMTPE	GMGRC	GMGRC1265-13	Specimen on BOLD	BIOUG05398-D09	bayw.5	BOLD:AAI5295	BIN on BOLD	BIOUG05398-D09	646	08-Jun-2012	Hymenoptera	Ichneumonidae	Encrateola	Kate Perez	BIN Taxonomy Match	June
GMTPE	GMGRC	GMGRC2907-13	Specimen on BOLD	BIOUG05397-C10	bayw.5	BOLD:AAI5543	BIN on BOLD	BIOUG05397-C10	632	08-Jun-2012	Hymenoptera	Ichneumonidae	Fiangniella	Kate Perez	BIN Taxonomy Match	June
GMTPE	GMGRC	GMGRC886-13	Specimen on BOLD	BIOUG05394-B01	bayw.5	BOLD:AAI5543	BIN on BOLD	BIOUG05394-B01	658	08-Jun-2012	Hymenoptera	Ichneumonidae	Fiangniella	Kate Perez	BIN Taxonomy Match	June
GMTPE	GMGRD	GMGRD1007-13	Specimen on BOLD	BIOUG05779-C04	bayw.7	BOLD:AAI5543	BIN on BOLD	BIOUG05779-C04	612	20-Jun-2012	Hymenoptera	Ichneumonidae	Fiangniella	Kate Perez	BIN Taxonomy Match	June
GMTPE	GMGRD	GMGRD1013-13	Specimen on BOLD	BIOUG05779-C10	bayw.7	BOLD:AAI5543	BIN on BOLD	BIOUG05779-C10	632	20-Jun-2012	Hymenoptera	Ichneumonidae	Fiangniella	Kate Perez	BIN Taxonomy Match	June
GMTPE	GMGRD	GMGRD1022-13	Specimen on BOLD	BIOUG05779-D07	bayw.7	BOLD:AAI5543	BIN on BOLD	BIOUG05779-D07	609	20-Jun-2012	Hymenoptera	Ichneumonidae	Fiangniella	Kate Perez	BIN Taxonomy Match	June
GMTPE	GMGRD	GMGRD1028-13	Specimen on BOLD	BIOUG05779-E01	bayw.7	BOLD:AAI5543	BIN on BOLD	BIOUG05779-E01	609	20-Jun-2012	Hymenoptera	Ichneumonidae	Fiangniella	Kate Perez	BIN Taxonomy Match	June
GMTPE	GMGRD	GMGRD1049-13	Specimen on BOLD	BIOUG05779-F10	bayw.7	BOLD:AAI5543	BIN on BOLD	BIOUG05779-F10	609	20-Jun-2012	Hymenoptera	Ichneumonidae	Fiangniella	Kate Perez	BIN Taxonomy Match	June
GMTPE	GMGRD	GMGRD1878-13	Specimen on BOLD	BIOUG05883-E07	bayw.7	BOLD:AAI5543	BIN on BOLD	BIOUG05883-E07	658	20-Jun-2012	Hymenoptera	Ichneumonidae	Fiangniella	Kate Perez	BIN Taxonomy Match	June
GMTPE	GMGRD	GMGRD258-13	Specimen on BOLD	BIOUG05487-E08	bayw.7	BOLD:AAI5543	BIN on BOLD	BIOUG05487-E08	658	20-Jun-2012	Hymenoptera	Ichneumonidae	Fiangniella	Kate Perez	BIN Taxonomy Match	June
GMTPE	GMGRD	GMGRD3457-13	Specimen on BOLD	BIOUG05943-C12	bayw.7	BOLD:AAI5543	BIN on BOLD	BIOUG05943-C12	618	20-Jun-2012	Hymenoptera	Ichneumonidae	Fiangniella	Kate Perez	BIN Taxonomy Match	June
GMTPE	GMGRE	GMGRE1494-13	Specimen on BOLD	BIOUG05943-H09	bayw.9	BOLD:AAI5543	BIN on BOLD	BIOUG05943-H09	630	04-Jul-2012	Hymenoptera	Ichneumonidae	Fiangniella	Kate Perez	BIN Taxonomy Match	July
GMTPE	GMGRE	GMGRE1593-13	Specimen on BOLD	BIOUG06099-A02	bayw.9	BOLD:AAI5543	BIN on BOLD	BIOUG06099-A02	658	04-Jul-2012	Hymenoptera	Ichneumonidae	Fiangniella	Kate Perez	BIN Taxonomy Match	July
GMTPE	GMGRF	GMGRF3406-13	Specimen on BOLD	BIOUG07016-D12	bayw.11	BOLD:AAI5562	BIN on BOLD	BIOUG07016-D12	547	25-Jul-2012	Hymenoptera	Ichneumonidae	Euryproctus	Kate Perez	BIN Taxonomy Match	July
GMTPE	GMGRB	GMGRB1413-13	Specimen on BOLD	BIOUG05261-C10	bayw.3	BOLD:AAI5591	BIN on BOLD	BIOUG05261-C10	658	22-May-2012	Hymenoptera	Ichneumonidae	Eusterinx	Kate Perez	BIN Taxonomy Match	May
GMTPE	GMGRC	GMGRC1264-13	Specimen on BOLD	BIOUG05398-D08	bayw.5	BOLD:AAI5591	BIN on BOLD	BIOUG05398-D08	632	08-Jun-2012	Hymenoptera	Ichneumonidae	Eusterinx	Kate Perez	BIN Taxonomy Match	June
GMTPE	GMGRC	GMGRC1279-13	Specimen on BOLD	BIOUG05398-E11	bayw.5	BOLD:AAI5591	BIN on BOLD	BIOUG05398-E11	639	08-Jun-2012	Hymenoptera	Ichneumonidae	Eusterinx	Kate Perez	BIN Taxonomy Match	June
GMTPE	GMGRC	GMGRC1293-13	Specimen on BOLD	BIOUG05398-G01	bayw.5	BOLD:AAI5591	BIN on BOLD	BIOUG05398-G01	641	08-Jun-2012	Hymenoptera	Ichneumonidae	Eusterinx	Kate Perez	BIN Taxonomy Match	June
GMTPE	GMGRC	GMGRC1310-13	Specimen on BOLD	BIOUG05398-H06	bayw.5	BOLD:AAI5591	BIN on BOLD	BIOUG05398-H06	641	08-Jun-2012	Hymenoptera	Ichneumonidae	Eusterinx	Kate Perez	BIN Taxonomy Match	June
GMTPE	GMGRC	GMGRC2209-13	Specimen on BOLD	BIOUG05482-A12	bayw.5	BOLD:AAI5591	BIN on BOLD	BIOUG05482-A12	658	08-Jun-2012	Hymenoptera	Ichneumonidae	Eusterinx	Kate Perez	BIN Taxonomy Match	June
GMTPE	GMGRC	GMGRC2218-13	Specimen on BOLD	BIOUG05482-B09	bayw.5	BOLD:AAI5591	BIN on BOLD	BIOUG05482-B09	658	08-Jun-2012	Hymenoptera	Ichneumonidae	Eusterinx	Kate Perez	BIN Taxonomy Match	June
GMTPE	GMGRC	GMGRC884-13	Specimen on BOLD	BIOUG05394-A11	bayw.5	BOLD:AAI5591	BIN on BOLD	BIOUG05394-A11	658	08-Jun-2012	Hymenoptera	Ichneumonidae	Eusterinx	Kate Perez	BIN Taxonomy Match	June
GMTPE	GMGRC	GMGRC894-13	Specimen on BOLD	BIOUG05394-B09	bayw.5	BOLD:AAI5591	BIN on BOLD	BIOUG05394-B09	542	08-Jun-2012	Hymenoptera	Ichneumonidae	Eusterinx	Kate Perez	BIN Taxonomy Match	June
GMTPE	GMGRD	GMGRD1037-13	Specimen on BOLD	BIOUG05779-E10	bayw.7	BOLD:AAI5591	BIN on BOLD	BIOUG05779-E10	607	20-Jun-2012	Hymenoptera	Ichneumonidae	Eusterinx	Kate Perez	BIN Taxonomy Match	June
GMTPE	GMGRD	GMGRD1071-13	Specimen on BOLD	BIOUG05779-H08	bayw.7	BOLD:AAI5591	BIN on BOLD	BIOUG05779-H08	609	20-Jun-2012	Hymenoptera	Ichneumonidae	Eusterinx	Kate Perez	BIN Taxonomy Match	June
GMTPE	GMGRD	GMGRD222-13	Specimen on BOLD	BIOUG05487-B08	bayw.7	BOLD:AAI5591	BIN on BOLD	BIOUG05487-B08	658	20-Jun-2012	Hymenoptera	Ichneumonidae	Eusterinx	Kate Perez	BIN Taxonomy Match	June
GMTPE	GMGRD	GMGRD256-13	Specimen on BOLD	BIOUG05487-E06	bayw.7	BOLD:AAI5591	BIN on BOLD	BIOUG05487-E06	658	20-Jun-2012	Hymenoptera	Ichneumonidae	Eusterinx	Kate Perez	BIN Taxonomy Match	June
GMTPE	GMGRD	GMGRD259-13	Specimen on BOLD	BIOUG05487-E09	bayw.7	BOLD:AAI5591	BIN on BOLD	BIOUG05487-E09	582	20-Jun-2012	Hymenoptera	Ichneumonidae	Eusterinx	Kate Perez	BIN Taxonomy Match	June
GMTPE	GMGRD	GMGRD261-13	Specimen on BOLD	BIOUG05487-E11	bayw.7	BOLD:AAI5591	BIN on BOLD	BIOUG05487-E11	575	20-Jun-2012	Hymenoptera	Ichneumonidae	Eusterinx	Kate Perez	BIN Taxonomy Match	June
GMTPE	GMGRD	GMGRD286-13	Specimen on BOLD	BIOUG05487-G12	bayw.7	BOLD:AAI5591	BIN on BOLD	BIOUG05487-G12	572	20-Jun-2012	Hymenoptera	Ichneumonidae	Eusterinx	Kate Perez	BIN Taxonomy Match	June
GMTPE	GMGRD	GMGRD290-13	Specimen on BOLD	BIOUG05487-H04	bayw.7	BOLD:AAI5591	BIN on BOLD	BIOUG05487-H04	585	20-Jun-2012	Hymenoptera	Ichneumonidae	Eusterinx	Kate Perez	BIN Taxonomy Match	June
GMTPE	GMGRD	GMGRD987-13	Specimen on BOLD	BIOUG05779-A08	bayw.7	BOLD:AAI5591	BIN on BOLD	BIOUG05779-A08	609	20-Jun-2012	Hymenoptera	Ichneumonidae	Eusterinx	Kate Perez	BIN Taxonomy Match	June
GMTPE	GMGRE	GMGRE1640-13	Specimen on BOLD	BIOUG06099-E01	bayw.9	BOLD:AAI5591	BIN on BOLD	BIOUG06099-E01	600	04-Jul-2012	Hymenoptera	Ichneumonidae	Eusterinx	Kate Perez	BIN Taxonomy Match	July
GMTPE	GMGRF	GMGRF1940-13	Specimen on BOLD	BIOUG07562-D04	bayw.11	BOLD:AAI5591	BIN on BOLD	BIOUG07562-D04	574	25-Jul-2012	Hymenoptera	Ichneumonidae	Eusterinx	Kate Perez	BIN Taxonomy Match	July
GMTPE	GMGRF	GMGRF3352-13	Specimen on BOLD	BIOUG06777-F07	bayw.11	BOLD:AAI5591	BIN on BOLD	BIOUG06777-F07	565	25-Jul-2012	Hymenoptera	Ichneumonidae	Eusterinx	Kate Perez	BIN Taxonomy Match	July
GMTPE	GMGRF	GMGRF4551-13	Specimen on BOLD	BIOUG07803-E04	bayw.11	BOLD:AAI5591	BIN on BOLD	BIOUG07803-E04	525	25-Jul-2012	Hymenoptera	Ichneumonidae	Eusterinx	Kate Perez	BIN Taxonomy Match	July
GMTPE	GMGRF	GMGRF4593-13	Specimen on BOLD	BIOUG07803-H10	bayw.11	BOLD:AAI5591	BIN on BOLD	BIOUG07803-H10	574	25-Jul-2012	Hymenoptera	Ichneumonidae	Eusterinx	Kate Perez	BIN Taxonomy Match	July
GMTPE	GMGRF	GMGRF663-13	Specimen on BOLD	BIOUG07411-H09	bayw.11	BOLD:AAI5591	BIN on BOLD	BIOUG07411-H09	566	25-Jul-2012	Hymenoptera	Ichneumonidae	Eusterinx	Kate Perez	BIN Taxonomy Match	July
GMTPE	GMGRG	GMGRG1108-13	Specimen on BOLD	BIOUG07502-C10	bayw.13	BOLD:AAI5591	BIN on BOLD	BIOUG07502-C10	550	12-Aug-2012	Hymenoptera	Ichneumonidae	Eusterinx	Kate Perez	BIN Taxonomy Match	August
GMTPE	GMGRG	GMGRG1131-13	Specimen on BOLD	BIOUG07502-E09	bayw.13	BOLD:AAI5591	BIN on BOLD	BIOUG07502-E09	558	12-Aug-2012	Hymenoptera	Ichneumonidae	Eusterinx	Kate Perez	BIN Taxonomy Match	August
GMTPE	GMGRG	GMGRG1133-13	Specimen on BOLD	BIOUG07502-E11	bayw.13	BOLD:AAI5591	BIN on BOLD	BIOUG07502-E11	550	12-Aug-2012	Hymenoptera	Ichneumonidae	Eusterinx	Kate Perez	BIN Taxonomy Match	August
GMTPE	GMGRG	GMGRG1144-13	Specimen on BOLD	BIOUG07502-F10	bayw.13	BOLD:AAI5591	BIN on BOLD	BIOUG07502-F10	579	12-Aug-2012	Hymenoptera	Ichneumonidae	Eusterinx	Kate Perez	BIN Taxonomy Match	August
GMTPE	GMGRG	GMGRG1154-13	Specimen on BOLD	BIOUG07502-G08	bayw.13	BOLD:AAI5591	BIN on BOLD	BIOUG07502-G08	591	12-Aug-2012	Hymenoptera	Ichneumonidae	Eusterinx	Kate Perez	BIN Taxonomy Match	August
GMTPE	GMGRI	GMGRI660-13	Specimen on BOLD	BIOUG08368-B02	bayw.17	BOLD:AAI5591	BIN on BOLD	BIOUG08368-B02	564	22-Sep-2012	Hymenoptera	Ichneumonidae	Eusterinx	Kate Perez	BIN Taxonomy Match	September
GMTPE	GMGRI	GMGRI667-13	Specimen on BOLD	BIOUG08368-B09	bayw.17	BOLD:AAI5591	BIN on BOLD	BIOUG08368-B09	564	22-Sep-2012	Hymenoptera	Ichneumonidae	Eusterinx	Kate Perez	BIN Taxonomy Match	September
GMTPZ	GMGMN	GMGMN580-14	Specimen on BOLD	BIOUG17439-B11	GMP#06029	BOLD:AAI5646	BIN on BOLD	BIOUG17439-B11	624	29-Jul-2014	Hymenoptera	Ichneumonidae	Gelis	Kate Perez	BIN Taxonomy Match	July
GMTPZ	GMGMI	GMGMI464-14	Specimen on BOLD	BIOUG17111-G07	GMP#06024	BOLD:AAI7633	BIN on BOLD	BIOUG17111-G07	594	16-May-2014	Hymenoptera	Ichneumonidae	Enizemum	Kate Perez	BIN Taxonomy Match	May
GMTPZ	GMGML	GMGML1454-14	Specimen on BOLD	BIOUG17271-G07	GMP#06027	BOLD:AAI8413	BIN on BOLD	BIOUG17271-G07	591	01-Jul-2014	Hymenoptera	Ichneumonidae	Hepiopelmus	Kate Perez	BOLD ID Engine Manual	July
GMTPZ	GMGML	GMGML200-14	Specimen on BOLD	BIOUG17230-A06	GMP#06027	BOLD:AAI8413	BIN on BOLD	BIOUG17230-A06	555	01-Jul-2014	Hymenoptera	Ichneumonidae	Hepiopelmus	Kate Perez	BOLD ID Engine Manual	July
GMTPZ	GMGMM	GMGMM324-14	Specimen on BOLD	BIOUG17299-D01	GMP#06028	BOLD:AAI8413	BIN on BOLD	BIOUG17299-D01	576	15-Jul-2014	Hymenoptera	Ichneumonidae	Hepiopelmus	Kate Perez	BOLD ID Engine Manual	July
GMTPZ	GMGMA	GMGMA1490-14	Specimen on BOLD	BIOUG16220-E10	GMP#06015	BOLD:AAI8775	BIN on BOLD	BIOUG16220-E10	574	25-Jul-2013	Hymenoptera	Colletidae	Hylaeus	Kate Perez	BIN Taxonomy Match	July
GMTPZ	GMGMA	GMGMA1498-14	Specimen on BOLD	BIOUG16220-F06	GMP#06015	BOLD:AAI8775	BIN on BOLD	BIOUG16220-F06	525	25-Jul-2013	Hymenoptera	Colletidae	Hylaeus	Kate Perez	BIN Taxonomy Match	July
GMTPZ	GMGMA	GMGMA958-14	Specimen on BOLD	BIOUG16215-A01	GMP#06015	BOLD:AAI8775	BIN on BOLD	BIOUG16215-A01	615	25-Jul-2013	Hymenoptera	Colletidae	Hylaeus	Kate Perez	BIN Taxonomy Match	July
GMTPZ	GMGMC	GMGMC924-14	Specimen on BOLD	BIOUG16523-E04	GMP#06016	BOLD:AAI8775	BIN on BOLD	BIOUG16523-E04	550	08-Aug-2013	Hymenoptera	Colletidae	Hylaeus	Kate Perez	BIN Taxonomy Match	August
GMTPZ	GMGMC	GMGMC668-14	Specimen on BOLD	BIOUG16520-B06	GMP#06016	BOLD:AAI9043	BIN on BOLD	BIOUG16520-B06	594	08-Aug-2013	Hymenoptera	Ichneumonidae	Cratichneumon	Kate Perez	BIN Taxonomy Match	August
GMTPZ	GMGMA	GMGMA1035-14	Specimen on BOLD	BIOUG16215-G06	GMP#06015	BOLD:AAI9475	BIN on BOLD	BIOUG16215-G06	658	25-Jul-2013	Hymenoptera	Ichneumonidae	Diadegma	Kate Perez	BIN Taxonomy Match	July
GMTPZ	GMGMA	GMGMA1526-14	Specimen on BOLD	BIOUG16220-H10	GMP#06015	BOLD:AAI9475	BIN on BOLD	BIOUG16220-H10	658	25-Jul-2013	Hymenoptera	Ichneumonidae	Diadegma	Kate Perez	BIN Taxonomy Match	July
GMTPZ	GMGMK	GMGMK434-14	Specimen on BOLD	BIOUG17176-C04	GMP#06026	BOLD:AAI9475	BIN on BOLD	BIOUG17176-C04	621	17-Jun-2014	Hymenoptera	Ichneumonidae	Diadegma	Kate Perez	BIN Taxonomy Match	June
GMTPE	GMGRC	GMGRC2214-13	Specimen on BOLD	BIOUG05482-B05	bayw.5	BOLD:AAI9890	BIN on BOLD	BIOUG05482-B05	658	08-Jun-2012	Hymenoptera	Braconidae	Dinotrema	Kate Perez	BIN Taxonomy Match	June
GMTPE	GMGRC	GMGRC912-13	Specimen on BOLD	BIOUG05394-D03	bayw.5	BOLD:AAI9890	BIN on BOLD	BIOUG05394-D03	658	08-Jun-2012	Hymenoptera	Braconidae	Dinotrema	Kate Perez	BIN Taxonomy Match	June
GMTPE	GMGRD	GMGRD1062-13	Specimen on BOLD	BIOUG05779-G11	bayw.7	BOLD:AAI9890	BIN on BOLD	BIOUG05779-G11	609	20-Jun-2012	Hymenoptera	Braconidae	Dinotrema	Kate Perez	BIN Taxonomy Match	June
GMTPE	GMGRD	GMGRD1073-13	Specimen on BOLD	BIOUG05779-H10	bayw.7	BOLD:AAI9890	BIN on BOLD	BIOUG05779-H10	601	20-Jun-2012	Hymenoptera	Braconidae	Dinotrema	Kate Perez	BIN Taxonomy Match	June
GMTPE	GMGRE	GMGRE002-13	Specimen on BOLD	BIOUG06064-D09	bayw.9	BOLD:AAI9890	BIN on BOLD	BIOUG06064-D09	596	04-Jul-2012	Hymenoptera	Braconidae	Dinotrema	Kate Perez	BIN Taxonomy Match	July
GMTPE	GMGRE	GMGRE706-13	Specimen on BOLD	BIOUG06089-A06	bayw.9	BOLD:AAI9890	BIN on BOLD	BIOUG06089-A06	613	04-Jul-2012	Hymenoptera	Braconidae	Dinotrema	Kate Perez	BIN Taxonomy Match	July
GMTPZ	GMGMI	GMGMI635-14	Specimen on BOLD	BIOUG17113-E12	GMP#06024	BOLD:AAJ0494	BIN on BOLD	BIOUG17113-E12	610	16-May-2014	Hymenoptera	Tenthredinidae	Eutomostethus	Kate Perez	BIN Taxonomy Match	May
GMTPZ	GMGMK	GMGMK423-14	Specimen on BOLD	BIOUG17176-B05	GMP#06026	BOLD:AAJ0494	BIN on BOLD	BIOUG17176-B05	588	17-Jun-2014	Hymenoptera	Tenthredinidae	Eutomostethus	Kate Perez	BIN Taxonomy Match	June
GMTPZ	GMGMK	GMGMK744-14	Specimen on BOLD	BIOUG17179-E05	GMP#06026	BOLD:AAJ0494	BIN on BOLD	BIOUG17179-E05	558	17-Jun-2014	Hymenoptera	Tenthredinidae	Eutomostethus	Kate Perez	BIN Taxonomy Match	June
GMTPZ	GMGMK	GMGMK747-14	Specimen on BOLD	BIOUG17179-E08	GMP#06026	BOLD:AAJ0494	BIN on BOLD	BIOUG17179-E08	551	17-Jun-2014	Hymenoptera	Tenthredinidae	Eutomostethus	Kate Perez	BIN Taxonomy Match	June
GMTPZ	GMGMK	GMGMK1502-14	Specimen on BOLD	BIOUG17226-E03	GMP#06026	BOLD:AAJ0840	BIN on BOLD	BIOUG17226-E03	588	17-Jun-2014	Hymenoptera	Braconidae	0	Kate Perez	BOLD ID Engine Manual	June
GMTPZ	GMGMK	GMGMK713-14	Specimen on BOLD	BIOUG17179-B10	GMP#06026	BOLD:AAJ0840	BIN on BOLD	BIOUG17179-B10	549	17-Jun-2014	Hymenoptera	Braconidae	0	Kate Perez	BOLD ID Engine Manual	June
GMTPZ	GMGML	GMGML654-14	Specimen on BOLD	BIOUG17263-D03	GMP#06027	BOLD:AAJ0840	BIN on BOLD	BIOUG17263-D03	658	01-Jul-2014	Hymenoptera	Braconidae	0	Kate Perez	BOLD ID Engine Manual	July
GMTPZ	GMGMA	GMGMA109-14	Specimen on BOLD	BIOUG15978-A07	GMP#06015	BOLD:AAJ1250	BIN on BOLD	BIOUG15978-A07	582	25-Jul-2013	Hymenoptera	Braconidae	Aphidius	Kate Perez	BIN Taxonomy Match	July
GMTPZ	GMGMC	GMGMC878-14	Specimen on BOLD	BIOUG16523-A06	GMP#06016	BOLD:AAJ1250	BIN on BOLD	BIOUG16523-A06	591	08-Aug-2013	Hymenoptera	Braconidae	Aphidius	Kate Perez	BIN Taxonomy Match	August
GMTPZ	GMGMI	GMGMI1091-14	Specimen on BOLD	BIOUG17118-D05	GMP#06024	BOLD:AAJ1450	BIN on BOLD	BIOUG17118-D05	588	16-May-2014	Hymenoptera	Tenthredinidae	Macrophya	Kate Perez	BIN Taxonomy Match	May
GMTPZ	GMGMI	GMGMI394-14	Specimen on BOLD	BIOUG17111-A09	GMP#06024	BOLD:AAJ1450	BIN on BOLD	BIOUG17111-A09	564	16-May-2014	Hymenoptera	Tenthredinidae	Macrophya	Kate Perez	BIN Taxonomy Match	May
GMTPZ	GMGMI	GMGMI450-14	Specimen on BOLD	BIOUG17111-F05	GMP#06024	BOLD:AAJ1450	BIN on BOLD	BIOUG17111-F05	588	16-May-2014	Hymenoptera	Tenthredinidae	Macrophya	Kate Perez	BIN Taxonomy Match	May
GMTPZ	GMGMJ	GMGMJ302-14	Specimen on BOLD	BIOUG17070-H07	GMP#06025	BOLD:AAJ1450	BIN on BOLD	BIOUG17070-H07	608	02-Jun-2014	Hymenoptera	Tenthredinidae	Macrophya	Kate Perez	BIN Taxonomy Match	June
GMTPZ	GMGMJ	GMGMJ896-14	Specimen on BOLD	BIOUG17093-C10	GMP#06025	BOLD:AAJ1450	BIN on BOLD	BIOUG17093-C10	615	02-Jun-2014	Hymenoptera	Tenthredinidae	Macrophya	Kate Perez	BIN Taxonomy Match	June
GMTPZ	GMGMK	GMGMK467-14	Specimen on BOLD	BIOUG17176-F01	GMP#06026	BOLD:AAJ1450	BIN on BOLD	BIOUG17176-F01	630	17-Jun-2014	Hymenoptera	Tenthredinidae	Macrophya	Kate Perez	BIN Taxonomy Match	June
GMTPZ	GMGML	GMGML365-14	Specimen on BOLD	BIOUG17231-C11	GMP#06027	BOLD:AAJ1450	BIN on BOLD	BIOUG17231-C11	608	01-Jul-2014	Hymenoptera	Tenthredinidae	Macrophya	Kate Perez	BIN Taxonomy Match	July
GMTPZ	GMGMA	GMGMA416-14	Specimen on BOLD	BIOUG16209-C05	GMP#06015	BOLD:AAJ2115	BIN on BOLD	BIOUG16209-C05	608	25-Jul-2013	Hymenoptera	Andrenidae	Andrena	Kate Perez	BIN Taxonomy Match	July
GMTPZ	GMGMA	GMGMA428-14	Specimen on BOLD	BIOUG16209-D05	GMP#06015	BOLD:AAJ2115	BIN on BOLD	BIOUG16209-D05	511	25-Jul-2013	Hymenoptera	Andrenidae	Andrena	Kate Perez	BIN Taxonomy Match	July
GMTPZ	GMGMA	GMGMA435-14	Specimen on BOLD	BIOUG16209-D12	GMP#06015	BOLD:AAJ2115	BIN on BOLD	BIOUG16209-D12	529	25-Jul-2013	Hymenoptera	Andrenidae	Andrena	Kate Perez	BIN Taxonomy Match	July
GMTPZ	GMGMA	GMGMA478-14	Specimen on BOLD	BIOUG16209-H07	GMP#06015	BOLD:AAJ2115	BIN on BOLD	BIOUG16209-H07	533	25-Jul-2013	Hymenoptera	Andrenidae	Andrena	Kate Perez	BIN Taxonomy Match	July
GMTPZ	GMGMA	GMGMA555-14	Specimen on BOLD	BIOUG16210-G01	GMP#06015	BOLD:AAJ2115	BIN on BOLD	BIOUG16210-G01	586	25-Jul-2013	Hymenoptera	Andrenidae	Andrena	Kate Perez	BIN Taxonomy Match	July
GMTPZ	GMGMA	GMGMA595-14	Specimen on BOLD	BIOUG16211-B06	GMP#06015	BOLD:AAJ2115	BIN on BOLD	BIOUG16211-B06	537	25-Jul-2013	Hymenoptera	Andrenidae	Andrena	Kate Perez	BIN Taxonomy Match	July
GMTPZ	GMGMA	GMGMA655-14	Specimen on BOLD	BIOUG16211-G06	GMP#06015	BOLD:AAJ2115	BIN on BOLD	BIOUG16211-G06	556	25-Jul-2013	Hymenoptera	Andrenidae	Andrena	Kate Perez	BIN Taxonomy Match	July
GMTPZ	GMGMC	GMGMC190-14	Specimen on BOLD	BIOUG16356-E07	GMP#06016	BOLD:AAJ2115	BIN on BOLD	BIOUG16356-E07	591	08-Aug-2013	Hymenoptera	Andrenidae	Andrena	Kate Perez	BIN Taxonomy Match	August
GMTPZ	GMGMC	GMGMC191-14	Specimen on BOLD	BIOUG16356-E08	GMP#06016	BOLD:AAJ2115	BIN on BOLD	BIOUG16356-E08	591	08-Aug-2013	Hymenoptera	Andrenidae	Andrena	Kate Perez	BIN Taxonomy Match	August
GMTPZ	GMGMC	GMGMC666-14	Specimen on BOLD	BIOUG16520-B04	GMP#06016	BOLD:AAJ2115	BIN on BOLD	BIOUG16520-B04	617	08-Aug-2013	Hymenoptera	Andrenidae	Andrena	Kate Perez	BIN Taxonomy Match	August
GMTPZ	GMGMC	GMGMC676-14	Specimen on BOLD	BIOUG16520-C02	GMP#06016	BOLD:AAJ2115	BIN on BOLD	BIOUG16520-C02	573	08-Aug-2013	Hymenoptera	Andrenidae	Andrena	Kate Perez	BIN Taxonomy Match	August
GMTPZ	GMGMI	GMGMI1069-14	Specimen on BOLD	BIOUG17118-B07	GMP#06024	BOLD:AAJ3604	BIN on BOLD	BIOUG17118-B07	591	16-May-2014	Hymenoptera	Tenthredinidae	Allantus	Kate Perez	BIN Taxonomy Match	May
GMTPZ	GMGMI	GMGMI1387-14	Specimen on BOLD	BIOUG17135-E04	GMP#06024	BOLD:AAJ3604	BIN on BOLD	BIOUG17135-E04	554	16-May-2014	Hymenoptera	Tenthredinidae	Allantus	Kate Perez	BIN Taxonomy Match	May
GMTPZ	GMGMI	GMGMI1392-14	Specimen on BOLD	BIOUG17135-E09	GMP#06024	BOLD:AAJ3604	BIN on BOLD	BIOUG17135-E09	567	16-May-2014	Hymenoptera	Tenthredinidae	Allantus	Kate Perez	BIN Taxonomy Match	May
GMTPZ	GMGMI	GMGMI404-14	Specimen on BOLD	BIOUG17111-B07	GMP#06024	BOLD:AAJ3604	BIN on BOLD	BIOUG17111-B07	591	16-May-2014	Hymenoptera	Tenthredinidae	Allantus	Kate Perez	BIN Taxonomy Match	May
GMTPZ	GMGMI	GMGMI418-14	Specimen on BOLD	BIOUG17111-C09	GMP#06024	BOLD:AAJ3604	BIN on BOLD	BIOUG17111-C09	591	16-May-2014	Hymenoptera	Tenthredinidae	Allantus	Kate Perez	BIN Taxonomy Match	May
GMTPZ	GMGMI	GMGMI478-14	Specimen on BOLD	BIOUG17111-H09	GMP#06024	BOLD:AAJ3604	BIN on BOLD	BIOUG17111-H09	564	16-May-2014	Hymenoptera	Tenthredinidae	Allantus	Kate Perez	BIN Taxonomy Match	May
GMTPZ	GMGMJ	GMGMJ949-14	Specimen on BOLD	BIOUG17093-H03	GMP#06025	BOLD:AAJ3604	BIN on BOLD	BIOUG17093-H03	555	02-Jun-2014	Hymenoptera	Tenthredinidae	Allantus	Kate Perez	BIN Taxonomy Match	June
GMTPZ	GMGMA	GMGMA1129-14	Specimen on BOLD	BIOUG16216-G05	GMP#06015	BOLD:AAJ9512	BIN on BOLD	BIOUG16216-G05	567	25-Jul-2013	Hymenoptera	Tenthredinidae	Athalia	Kate Perez	BIN Taxonomy Match	July
GMTPZ	GMGMC	GMGMC734-14	Specimen on BOLD	BIOUG16520-G12	GMP#06016	BOLD:AAJ9512	BIN on BOLD	BIOUG16520-G12	555	08-Aug-2013	Hymenoptera	Tenthredinidae	Athalia	Kate Perez	BIN Taxonomy Match	August
GMTPZ	GMGMD	GMGMD1209-14	Specimen on BOLD	BIOUG16618-A08	GMP#06018	BOLD:AAJ9512	BIN on BOLD	BIOUG16618-A08	576	16-Sep-2013	Hymenoptera	Tenthredinidae	Athalia	Kate Perez	BIN Taxonomy Match	September
GMTPZ	GMGMI	GMGMI1077-14	Specimen on BOLD	BIOUG17118-C03	GMP#06024	BOLD:AAJ9512	BIN on BOLD	BIOUG17118-C03	588	16-May-2014	Hymenoptera	Tenthredinidae	Athalia	Kate Perez	BIN Taxonomy Match	May
GMTPZ	GMGMJ	GMGMJ630-14	Specimen on BOLD	BIOUG17072-E05	GMP#06025	BOLD:AAJ9512	BIN on BOLD	BIOUG17072-E05	598	02-Jun-2014	Hymenoptera	Tenthredinidae	Athalia	Kate Perez	BIN Taxonomy Match	June
GMTPZ	GMGMJ	GMGMJ955-14	Specimen on BOLD	BIOUG17093-H09	GMP#06025	BOLD:AAJ9512	BIN on BOLD	BIOUG17093-H09	555	02-Jun-2014	Hymenoptera	Tenthredinidae	Athalia	Kate Perez	BIN Taxonomy Match	June
GMTPZ	GMGMK	GMGMK1108-14	Specimen on BOLD	BIOUG17222-D01	GMP#06026	BOLD:AAJ9512	BIN on BOLD	BIOUG17222-D01	591	17-Jun-2014	Hymenoptera	Tenthredinidae	Athalia	Kate Perez	BIN Taxonomy Match	June
GMTPZ	GMGMN	GMGMN1353-14	Specimen on BOLD	BIOUG17447-C12	GMP#06029	BOLD:AAJ9512	BIN on BOLD	BIOUG17447-C12	546	29-Jul-2014	Hymenoptera	Ichneumonidae	Acrotomus	Kate Perez	BOLD ID Engine Manual	July
GMTPZ	GMGMN	GMGMN1535-14	Specimen on BOLD	BIOUG17467-C04	GMP#06029	BOLD:AAJ9512	BIN on BOLD	BIOUG17467-C04	546	29-Jul-2014	Hymenoptera	Ichneumonidae	Acrotomus	Kate Perez	BOLD ID Engine Manual	July
GMTPZ	GMGMN	GMGMN1560-14	Specimen on BOLD	BIOUG17467-E05	GMP#06029	BOLD:AAK0980	BIN on BOLD	BIOUG17467-E05	521	29-Jul-2014	Hymenoptera	Ichneumonidae	Acrotomus	Kate Perez	BOLD ID Engine Manual	July
GMTPZ	GMGMD	GMGMD501-14	Specimen on BOLD	BIOUG16610-E12	GMP#06018	BOLD:AAK1321	BIN on BOLD	BIOUG16610-E12	567	16-Sep-2013	Hymenoptera	Ichneumonidae	Syrphoctonus	Kate Perez	BIN Taxonomy Match	September
GMTPZ	GMGMI	GMGMI461-14	Specimen on BOLD	BIOUG17111-G04	GMP#06024	BOLD:AAK1321	BIN on BOLD	BIOUG17111-G04	618	16-May-2014	Hymenoptera	Ichneumonidae	Syrphoctonus	Kate Perez	BIN Taxonomy Match	May
GMTPZ	GMGMJ	GMGMJ1301-14	Specimen on BOLD	BIOUG17097-E11	GMP#06025	BOLD:AAK1321	BIN on BOLD	BIOUG17097-E11	615	02-Jun-2014	Hymenoptera	Ichneumonidae	Syrphoctonus	Kate Perez	BIN Taxonomy Match	June
GMTPZ	GMGML	GMGML1443-14	Specimen on BOLD	BIOUG17271-F08	GMP#06027	BOLD:AAK1321	BIN on BOLD	BIOUG17271-F08	582	01-Jul-2014	Hymenoptera	Ichneumonidae	Syrphoctonus	Kate Perez	BIN Taxonomy Match	July
GMTPZ	GMGML	GMGML377-14	Specimen on BOLD	BIOUG17231-D11	GMP#06027	BOLD:AAK1321	BIN on BOLD	BIOUG17231-D11	611	01-Jul-2014	Hymenoptera	Ichneumonidae	Syrphoctonus	Kate Perez	BIN Taxonomy Match	July
GMTPZ	GMGMM	GMGMM437-14	Specimen on BOLD	BIOUG17301-D05	GMP#06028	BOLD:AAK1321	BIN on BOLD	BIOUG17301-D05	591	15-Jul-2014	Hymenoptera	Ichneumonidae	Syrphoctonus	Kate Perez	BIN Taxonomy Match	July
GMTPZ	GMGML	GMGML709-14	Specimen on BOLD	BIOUG17263-H10	GMP#06027	BOLD:AAK1354	BIN on BOLD	BIOUG17263-H10	591	01-Jul-2014	Hymenoptera	Ichneumonidae	0	Kate Perez	BOLD ID Engine Manual	July
GMTPZ	GMGMM	GMGMM924-14	Specimen on BOLD	BIOUG17373-E05	GMP#06028	BOLD:AAK3162	BIN on BOLD	BIOUG17373-E05	658	15-Jul-2014	Hymenoptera	Ichneumonidae	Tycherus	Kate Perez	BOLD ID Engine Manual	July
GMTPZ	GMGMJ	GMGMJ121-14	Specimen on BOLD	BIOUG17069-A05	GMP#06025	BOLD:AAK6376	BIN on BOLD	BIOUG17069-A05	603	02-Jun-2014	Hymenoptera	Tenthredinidae	Macrophya	Kate Perez	BIN Taxonomy Match	June
GMTPZ	GMGMI	GMGMI011-14	Specimen on BOLD	BIOUG17084-A06	GMP#06024	BOLD:AAK6380	BIN on BOLD	BIOUG17084-A06	447	16-May-2014	Hymenoptera	Tenthredinidae	Macrophya	Kate Perez	BOLD ID Engine Manual	May
GMTPZ	GMGMI	GMGMI387-14	Specimen on BOLD	BIOUG17111-A02	GMP#06024	BOLD:AAK6380	BIN on BOLD	BIOUG17111-A02	588	16-May-2014	Hymenoptera	Tenthredinidae	Macrophya	Kate Perez	BOLD ID Engine Manual	May
GMTPZ	GMGMI	GMGMI476-14	Specimen on BOLD	BIOUG17111-H07	GMP#06024	BOLD:AAK6380	BIN on BOLD	BIOUG17111-H07	582	16-May-2014	Hymenoptera	Tenthredinidae	Macrophya	Kate Perez	BOLD ID Engine Manual	May
GMTPZ	GMGMJ	GMGMJ119-14	Specimen on BOLD	BIOUG17069-A03	GMP#06025	BOLD:AAK6380	BIN on BOLD	BIOUG17069-A03	552	02-Jun-2014	Hymenoptera	Tenthredinidae	Macrophya	Kate Perez	BOLD ID Engine Manual	June
GMTPZ	GMGMC	GMGMC874-14	Specimen on BOLD	BIOUG16523-A02	GMP#06016	BOLD:AAL0670	BIN on BOLD	BIOUG16523-A02	648	08-Aug-2013	Hymenoptera	Braconidae	Ephedrus	Kate Perez	BIN Taxonomy Match	August
GMTPZ	GMGMM	GMGMM304-14	Specimen on BOLD	BIOUG17299-B05	GMP#06028	BOLD:AAL2075	BIN on BOLD	BIOUG17299-B05	551	15-Jul-2014	Hymenoptera	Ichneumonidae	Diphyus	Kate Perez	BOLD ID Engine Manual	July
GMTPZ	GMGMM	GMGMM316-14	Specimen on BOLD	BIOUG17299-C05	GMP#06028	BOLD:AAL2075	BIN on BOLD	BIOUG17299-C05	559	15-Jul-2014	Hymenoptera	Ichneumonidae	Diphyus	Kate Perez	BOLD ID Engine Manual	July
GMTPZ	GMGMM	GMGMM491-14	Specimen on BOLD	BIOUG17301-H11	GMP#06028	BOLD:AAL2075	BIN on BOLD	BIOUG17301-H11	579	15-Jul-2014	Hymenoptera	Ichneumonidae	Diphyus	Kate Perez	BOLD ID Engine Manual	July
GMTPZ	GMGMN	GMGMN1230-14	Specimen on BOLD	BIOUG17446-A08	GMP#06029	BOLD:AAL5216	BIN on BOLD	BIOUG17446-A08	618	29-Jul-2014	Hymenoptera	Ichneumonidae	Acrotomus	Kate Perez	BOLD ID Engine Manual	July
GMTPZ	GMGMN	GMGMN1286-14	Specimen on BOLD	BIOUG17446-F04	GMP#06029	BOLD:AAL5216	BIN on BOLD	BIOUG17446-F04	612	29-Jul-2014	Hymenoptera	Ichneumonidae	Acrotomus	Kate Perez	BOLD ID Engine Manual	July
GMTPZ	GMGMN	GMGMN1296-14	Specimen on BOLD	BIOUG17446-G02	GMP#06029	BOLD:AAL5216	BIN on BOLD	BIOUG17446-G02	608	29-Jul-2014	Hymenoptera	Ichneumonidae	Acrotomus	Kate Perez	BOLD ID Engine Manual	July
GMTPZ	GMGMN	GMGMN1310-14	Specimen on BOLD	BIOUG17446-H04	GMP#06029	BOLD:AAL5216	BIN on BOLD	BIOUG17446-H04	545	29-Jul-2014	Hymenoptera	Ichneumonidae	Acrotomus	Kate Perez	BOLD ID Engine Manual	July
GMTPZ	GMGMN	GMGMN1311-14	Specimen on BOLD	BIOUG17446-H05	GMP#06029	BOLD:AAL5216	BIN on BOLD	BIOUG17446-H05	604	29-Jul-2014	Hymenoptera	Ichneumonidae	Acrotomus	Kate Perez	BOLD ID Engine Manual	July
GMTPZ	GMGMN	GMGMN1578-14	Specimen on BOLD	BIOUG17467-F11	GMP#06029	BOLD:AAL5216	BIN on BOLD	BIOUG17467-F11	583	29-Jul-2014	Hymenoptera	Ichneumonidae	Acrotomus	Kate Perez	BOLD ID Engine Manual	July
GMTPZ	GMGMD	GMGMD273-14	Specimen on BOLD	BIOUG16608-B10	GMP#06018	BOLD:AAM3899	BIN on BOLD	BIOUG16608-B10	546	16-Sep-2013	Hymenoptera	Vespidae	Ancistrocerus	Kate Perez	BIN Taxonomy Match	September
GMTPZ	GMGMI	GMGMI423-14	Specimen on BOLD	BIOUG17111-D02	GMP#06024	BOLD:AAM3899	BIN on BOLD	BIOUG17111-D02	564	16-May-2014	Hymenoptera	Vespidae	Ancistrocerus	Kate Perez	BIN Taxonomy Match	May
GMTPZ	GMGMI	GMGMI447-14	Specimen on BOLD	BIOUG17111-F02	GMP#06024	BOLD:AAM3899	BIN on BOLD	BIOUG17111-F02	588	16-May-2014	Hymenoptera	Vespidae	Ancistrocerus	Kate Perez	BIN Taxonomy Match	May
GMTPZ	GMGMN	GMGMN1344-14	Specimen on BOLD	BIOUG17447-C03	GMP#06029	BOLD:AAM3899	BIN on BOLD	BIOUG17447-C03	576	29-Jul-2014	Hymenoptera	Ichneumonidae	Acrotomus	Kate Perez	BOLD ID Engine Manual	July
GMTPZ	GMGML	GMGML173-14	Specimen on BOLD	BIOUG17229-G02	GMP#06027	BOLD:AAM3988	BIN on BOLD	BIOUG17229-G02	616	01-Jul-2014	Hymenoptera	Vespidae	Dolichovespula	Kate Perez	BIN Taxonomy Match	July
GMTPZ	GMGMM	GMGMM298-14	Specimen on BOLD	BIOUG17299-A11	GMP#06028	BOLD:AAM3988	BIN on BOLD	BIOUG17299-A11	516	15-Jul-2014	Hymenoptera	Vespidae	Dolichovespula	Kate Perez	BIN Taxonomy Match	July
GMTPZ	GMGMN	GMGMN173-14	Specimen on BOLD	BIOUG17382-C03	GMP#06029	BOLD:AAM3988	BIN on BOLD	BIOUG17382-C03	588	29-Jul-2014	Hymenoptera	Vespidae	Dolichovespula	Kate Perez	BIN Taxonomy Match	July
GMTPZ	GMGMN	GMGMN872-14	Specimen on BOLD	BIOUG17442-C06	GMP#06029	BOLD:AAM4594	BIN on BOLD	BIOUG17442-C06	582	29-Jul-2014	Hymenoptera	Gasteruptiidae	Gasteruption	Kate Perez	BIN Taxonomy Match	July
GMTPZ	GMGMM	GMGMM450-14	Specimen on BOLD	BIOUG17301-E06	GMP#06028	BOLD:AAM4920	BIN on BOLD	BIOUG17301-E06	579	15-Jul-2014	Hymenoptera	Tenthredinidae	Nematus	Kate Perez	BIN Taxonomy Match	July
GMTPZ	GMGMI	GMGMI1413-14	Specimen on BOLD	BIOUG17135-G06	GMP#06024	BOLD:AAM7350	BIN on BOLD	BIOUG17135-G06	534	16-May-2014	Hymenoptera	Ichneumonidae	0	Kate Perez	BOLD ID Engine Manual	May
[truncated: 19,006 more rows]
